# Supplementary material for: Ferroptotic stress promotes the accumulation of pro-inflammatory proximal tubular cells in maladaptive renal repair
Source: eLife. 2021 Jul 19;10:e68603. doi: 10.7554/eLife.68603 (PMC8318592; doi:10.7554/eLife.68603)
Supplement: Supplementary file 1. [file elife-68603-supp1.xlsx]

## Sheet: Find all markers
gene	p_val	avg_logFC	pct.1	pct.2	p_val_adj	cluster	cell type
Umod	0	2.48706	0.984	0.331	0	0	TAL
Slc12a1	0	2.26793	0.888	0.087	0	0	TAL
Egf	0	1.45424	0.514	0.11	0	0	TAL
Spp1	0	1.41323	0.993	0.84	0	0	TAL
Mt2	0	1.01804	0.804	0.34	0	0	TAL
Wfdc15b	0	1.01016	0.579	0.104	0	0	TAL
Mt1	0	0.99594	0.916	0.6	0	0	TAL
Lcn2	0	0.928549	0.659	0.196	0	0	TAL
Defb1	0	0.885453	0.855	0.354	0	0	TAL
Cd24a	0	0.707955	0.866	0.435	0	0	TAL
Kng2	0	0.702749	0.683	0.171	0	0	TAL
Tsc22d1	0	0.680049	0.831	0.484	0	0	TAL
Wfdc2	0	0.679251	0.805	0.305	0	0	TAL
Mrps6	0	0.662581	0.677	0.201	0	0	TAL
Atp1b1	0	0.646671	0.976	0.652	0	0	TAL
Atp1a1	0	0.638164	0.957	0.63	0	0	TAL
Slc5a3	0	0.619886	0.544	0.133	0	0	TAL
Ppp1r1a	0	0.617537	0.472	0.094	0	0	TAL
Cldn10	0	0.574598	0.375	0.037	0	0	TAL
Ly6a	0	0.571534	0.952	0.559	0	0	TAL
Eprn	0	0.495198	0.299	0.012	0	0	TAL
Epcam	0	0.487225	0.731	0.302	0	0	TAL
Kctd1	0	0.4157	0.371	0.079	0	0	TAL
Slc5a1	0	0.302612	0.256	0.015	0	0	TAL
Paqr5	2.62561e-298	0.417318	0.491	0.156	4.91881e-294	0	TAL
Las1l	2.94657e-267	0.580494	0.453	0.151	5.52011e-263	0	TAL
Fxyd2	2.53889e-262	0.580973	0.905	0.537	4.75636e-258	0	TAL
Sostdc1	1.28977e-260	0.458203	0.301	0.068	2.41625e-256	0	TAL
Tspan8	5.53523e-252	0.372587	0.547	0.201	1.03697e-247	0	TAL
Kcnk1	2.06398e-250	0.316783	0.357	0.096	3.86665e-246	0	TAL
Mal	7.75666e-247	0.459046	0.72	0.338	1.45313e-242	0	TAL
Pik3r1	1.67535e-245	0.401577	0.448	0.151	3.1386e-241	0	TAL
Sorl1	2.1469e-228	0.319802	0.376	0.114	4.02199e-224	0	TAL
Sfn	5.54236e-204	0.491644	0.483	0.19	1.03831e-199	0	TAL
Tmem72	1.29116e-193	0.272408	0.328	0.098	2.41886e-189	0	TAL
Itga6	4.71016e-193	0.386574	0.513	0.223	8.82402e-189	0	TAL
Hbegf	3.67304e-188	0.737949	0.675	0.387	6.88107e-184	0	TAL
Syne2	1.28252e-184	0.489736	0.713	0.414	2.40268e-180	0	TAL
Cd63	3.76901e-177	0.405053	0.857	0.577	7.06086e-173	0	TAL
Net1	7.1991e-170	0.333275	0.415	0.167	1.34868e-165	0	TAL
Pkp4	3.1458e-166	0.297356	0.39	0.15	5.89334e-162	0	TAL
mt-Nd5	1.16436e-144	0.620003	0.964	0.871	2.18131e-140	0	TAL
Sdc4	2.71726e-137	0.309191	0.835	0.553	5.09051e-133	0	TAL
Nudt4	6.51286e-136	0.322803	0.636	0.346	1.22012e-131	0	TAL
Etnk1	7.39364e-135	0.277037	0.373	0.153	1.38512e-130	0	TAL
Itgb6	5.01744e-130	0.292387	0.359	0.149	9.39968e-126	0	TAL
Mgst3	6.01294e-128	0.257875	0.378	0.16	1.12646e-123	0	TAL
Kcnj16	2.68978e-127	0.319987	0.475	0.235	5.03903e-123	0	TAL
Emp1	4.52947e-127	0.285619	0.393	0.169	8.48551e-123	0	TAL
Car2	9.37893e-126	0.440679	0.51	0.263	1.75705e-121	0	TAL
Lgals3	1.23199e-125	0.406504	0.634	0.37	2.30801e-121	0	TAL
Tacc2	4.89421e-124	0.266255	0.343	0.141	9.16881e-120	0	TAL
mt-Nd4	5.40014e-118	0.63818	0.862	0.728	1.01166e-113	0	TAL
Elovl7	3.41839e-114	0.255953	0.334	0.141	6.40402e-110	0	TAL
Sox4	6.09724e-113	0.327784	0.472	0.241	1.14226e-108	0	TAL
Dst	6.29785e-112	0.280025	0.471	0.243	1.17984e-107	0	TAL
Cox6c	9.87087e-110	0.307992	0.854	0.639	1.84921e-105	0	TAL
Cgnl1	2.84621e-107	0.281936	0.455	0.233	5.33209e-103	0	TAL
mt-Co1	8.04723e-104	0.570821	0.795	0.574	1.50757e-99	0	TAL
Slc38a2	1.26172e-101	0.294447	0.436	0.228	2.36371e-97	0	TAL
mt-Cytb	2.30384e-101	0.594514	0.959	0.881	4.31601e-97	0	TAL
Rgs2	1.93314e-96	0.265239	0.349	0.16	3.62155e-92	0	TAL
mt-Nd1	3.44826e-95	0.502076	0.882	0.764	6.45997e-91	0	TAL
Mpc2	1.41697e-92	0.261079	0.569	0.335	2.65456e-88	0	TAL
Cox4i1	7.42862e-91	0.304808	0.864	0.696	1.39168e-86	0	TAL
Id2	3.99231e-86	0.335973	0.599	0.384	7.47919e-82	0	TAL
Ivns1abp	1.83802e-81	0.258283	0.574	0.359	3.44334e-77	0	TAL
Rtn4	7.69347e-80	0.297183	0.548	0.353	1.44129e-75	0	TAL
Cox5b	5.29115e-79	0.276673	0.663	0.463	9.91244e-75	0	TAL
Cox8a	7.99727e-77	0.257437	0.629	0.419	1.49821e-72	0	TAL
mt-Nd2	1.64003e-76	0.480939	0.903	0.833	3.07244e-72	0	TAL
Krt8	7.35356e-68	0.315853	0.545	0.348	1.37762e-63	0	TAL
Pth1r	6.41484e-66	0.260163	0.31	0.161	1.20176e-61	0	TAL
Cox6a1	2.46105e-64	0.264733	0.81	0.642	4.61054e-60	0	TAL
Zfp36l1	2.46077e-62	0.262526	0.741	0.582	4.61001e-58	0	TAL
Gclc	7.81239e-60	0.256449	0.33	0.184	1.46357e-55	0	TAL
Klf6	7.09719e-51	0.326744	0.729	0.595	1.32959e-46	0	TAL
Atf3	2.13219e-24	0.283888	0.631	0.554	3.99445e-20	0	TAL
Slc12a3	0	1.87666	0.942	0.117	0	1	DCT1
Fxyd2	0	1.22297	0.981	0.535	0	1	DCT1
Mt1	0	1.15763	0.938	0.603	0	1	DCT1
Mt2	0	1.12742	0.807	0.347	0	1	DCT1
Defb1	0	0.989404	0.822	0.365	0	1	DCT1
Ly6a	0	0.954157	0.976	0.563	0	1	DCT1
Atp1a1	0	0.929004	0.976	0.633	0	1	DCT1
Clu	0	0.923573	0.955	0.556	0	1	DCT1
Ldhb	0	0.846776	0.945	0.492	0	1	DCT1
Atp1b1	0	0.81876	0.985	0.656	0	1	DCT1
Egf	0	0.779423	0.525	0.115	0	1	DCT1
Wfdc15b	0	0.770804	0.519	0.118	0	1	DCT1
Kng2	0	0.741917	0.732	0.174	0	1	DCT1
Cox6c	0	0.710398	0.928	0.635	0	1	DCT1
Sfrp1	0	0.697007	0.489	0.084	0	1	DCT1
Tmem52b	0	0.684618	0.596	0.16	0	1	DCT1
Ppp1r1a	0	0.650773	0.515	0.096	0	1	DCT1
Tmem213	0	0.639084	0.701	0.213	0	1	DCT1
Ptgfr	0	0.632651	0.458	0.035	0	1	DCT1
Pvalb	0	0.601285	0.289	0.008	0	1	DCT1
Trpm7	0	0.555544	0.57	0.163	0	1	DCT1
Umod	0	0.514614	0.792	0.362	0	1	DCT1
Fabp3	0	0.489572	0.382	0.069	0	1	DCT1
Pigr	0	0.472901	0.339	0.065	0	1	DCT1
Pgam2	0	0.458508	0.354	0.061	0	1	DCT1
Tmem72	0	0.418384	0.432	0.09	0	1	DCT1
Abca13	0	0.398803	0.345	0.027	0	1	DCT1
Hoxb5os	0	0.300238	0.296	0.044	0	1	DCT1
Mfsd4a	0	0.269345	0.286	0.043	0	1	DCT1
Oxct1	1.31912e-303	0.762521	0.716	0.336	2.47124e-299	1	DCT1
Mrps6	1.65154e-299	0.485039	0.614	0.216	3.09399e-295	1	DCT1
Sdc4	8.52951e-291	0.631983	0.918	0.549	1.59792e-286	1	DCT1
Clcnkb	5.70343e-283	0.412538	0.564	0.185	1.06848e-278	1	DCT1
Slc16a7	5.04689e-276	0.342949	0.347	0.077	9.45484e-272	1	DCT1
Wnk4	5.27667e-271	0.310084	0.344	0.077	9.88532e-267	1	DCT1
Spint2	5.43878e-262	0.422134	0.634	0.253	1.0189e-257	1	DCT1
Cox4i1	8.82084e-256	0.614942	0.941	0.691	1.6525e-251	1	DCT1
Cox6a1	3.32089e-255	0.612714	0.892	0.636	6.22135e-251	1	DCT1
S100a1	1.76808e-246	0.456751	0.767	0.364	3.31231e-242	1	DCT1
mt-Nd4	2.77657e-241	0.717002	0.923	0.724	5.20164e-237	1	DCT1
Ctsd	3.62192e-238	0.672569	0.797	0.466	6.78531e-234	1	DCT1
Cox5b	4.65967e-235	0.554314	0.787	0.453	8.72943e-231	1	DCT1
Cox6b1	1.85036e-229	0.54959	0.811	0.49	3.46647e-225	1	DCT1
Spp1	6.37978e-229	0.917412	0.972	0.845	1.19519e-224	1	DCT1
mt-Nd5	9.08173e-227	0.657912	0.978	0.871	1.70137e-222	1	DCT1
Mal	2.203e-223	0.405955	0.749	0.342	4.12709e-219	1	DCT1
Tacstd2	2.68478e-219	0.441793	0.552	0.209	5.02967e-215	1	DCT1
Ndufa1	2.50809e-217	0.421588	0.602	0.268	4.69866e-213	1	DCT1
Ndufb9	2.24194e-215	0.465664	0.659	0.319	4.20004e-211	1	DCT1
mt-Nd2	1.32506e-213	0.584364	0.959	0.828	2.48237e-209	1	DCT1
Igfbp7	1.10615e-210	0.382554	0.937	0.601	2.07227e-206	1	DCT1
Cox8a	1.27234e-210	0.538766	0.739	0.411	2.38361e-206	1	DCT1
Cox7c	1.18288e-209	0.479756	0.826	0.527	2.21602e-205	1	DCT1
mt-Cytb	3.62651e-206	0.68191	0.976	0.88	6.79391e-202	1	DCT1
Wfdc2	1.17096e-205	0.642488	0.674	0.327	2.19368e-201	1	DCT1
Ndufa4	3.61948e-203	0.516296	0.804	0.498	6.78072e-199	1	DCT1
Cox7b	7.04434e-200	0.485514	0.736	0.415	1.31969e-195	1	DCT1
Atp5j	5.42974e-198	0.479066	0.717	0.392	1.01721e-193	1	DCT1
Epcam	4.32703e-196	0.358255	0.7	0.312	8.10626e-192	1	DCT1
Cox7a2	3.7567e-192	0.490477	0.752	0.45	7.03779e-188	1	DCT1
Gabarapl1	2.72199e-189	0.550907	0.627	0.321	5.09938e-185	1	DCT1
Uqcrq	2.93365e-189	0.491594	0.713	0.4	5.4959e-185	1	DCT1
Cdh1	3.70909e-188	0.363022	0.539	0.222	6.94862e-184	1	DCT1
mt-Nd1	4.643e-188	0.541893	0.937	0.76	8.69819e-184	1	DCT1
Kcnj1	2.8177e-187	0.344756	0.338	0.1	5.27868e-183	1	DCT1
Atp5b	1.7855e-184	0.436576	0.848	0.556	3.34495e-180	1	DCT1
Kctd1	6.0189e-184	0.279268	0.319	0.089	1.12758e-179	1	DCT1
Atp5g3	1.97068e-182	0.461206	0.793	0.484	3.69188e-178	1	DCT1
Wnk1	9.61934e-180	0.626794	0.532	0.248	1.80209e-175	1	DCT1
mt-Co1	5.88416e-175	0.686735	0.84	0.573	1.10234e-170	1	DCT1
Sgms2	2.9477e-174	0.264916	0.33	0.099	5.52223e-170	1	DCT1
Ndufb6	2.55821e-173	0.374593	0.551	0.247	4.79255e-169	1	DCT1
Hoxd8	2.18961e-172	0.339818	0.373	0.127	4.10202e-168	1	DCT1
Tnfrsf12a	3.56711e-172	0.48436	0.562	0.272	6.68263e-168	1	DCT1
Slc25a5	1.57031e-171	0.464475	0.825	0.533	2.94183e-167	1	DCT1
Atp5g1	2.51644e-166	0.44833	0.604	0.305	4.71431e-162	1	DCT1
2010107E04Rik	1.14444e-165	0.390642	0.686	0.377	2.14399e-161	1	DCT1
Socs2	1.65689e-165	0.272343	0.334	0.106	3.10401e-161	1	DCT1
Calb1	6.54759e-165	0.488517	0.321	0.099	1.22663e-160	1	DCT1
Uqcr10	7.14619e-165	0.418951	0.711	0.404	1.33877e-160	1	DCT1
Pkm	2.90068e-161	0.327496	0.608	0.293	5.43413e-157	1	DCT1
Slc5a3	2.5368e-158	0.372657	0.408	0.154	4.75245e-154	1	DCT1
Mgst3	1.59175e-155	0.316362	0.413	0.16	2.98198e-151	1	DCT1
Pcolce	3.37628e-152	0.2517	0.318	0.101	6.32512e-148	1	DCT1
Sppl2a	2.99155e-149	0.278006	0.397	0.151	5.60437e-145	1	DCT1
Cldn7	5.75951e-144	0.281495	0.561	0.254	1.07899e-139	1	DCT1
Itgav	6.51338e-143	0.386323	0.5	0.236	1.22022e-138	1	DCT1
Chchd10	6.59799e-143	0.37481	0.672	0.369	1.23607e-138	1	DCT1
Paqr5	5.12025e-141	0.269804	0.422	0.169	9.59227e-137	1	DCT1
Usmg5	1.7095e-138	0.347174	0.601	0.322	3.20257e-134	1	DCT1
Atp5j2	7.82913e-136	0.387332	0.689	0.418	1.46671e-131	1	DCT1
Atp6v0a4	8.6445e-136	0.277188	0.444	0.188	1.61946e-131	1	DCT1
Atp5a1	2.45042e-129	0.379927	0.745	0.48	4.59062e-125	1	DCT1
Sytl2	3.97945e-129	0.27258	0.337	0.125	7.45509e-125	1	DCT1
Ezr	1.23327e-128	0.364597	0.739	0.454	2.31041e-124	1	DCT1
Atp5k	6.01102e-128	0.318312	0.564	0.294	1.1261e-123	1	DCT1
Phyh	2.81123e-125	0.284764	0.452	0.205	5.26657e-121	1	DCT1
Ndufb11	7.49991e-122	0.29787	0.456	0.214	1.40503e-117	1	DCT1
Ndufc1	3.16163e-120	0.324513	0.613	0.345	5.92299e-116	1	DCT1
Ckb	2.46097e-119	0.299103	0.297	0.106	4.61038e-115	1	DCT1
Cox5a	5.868e-119	0.351661	0.671	0.396	1.09931e-114	1	DCT1
Atp5c1	2.93433e-118	0.353991	0.649	0.385	5.49717e-114	1	DCT1
Bag1	1.64101e-117	0.305376	0.59	0.321	3.07427e-113	1	DCT1
Uqcrh	7.49745e-116	0.336702	0.627	0.365	1.40457e-111	1	DCT1
Atp5o	1.18238e-114	0.340715	0.597	0.34	2.21507e-110	1	DCT1
Atp5e	2.98643e-111	0.364587	0.688	0.446	5.59478e-107	1	DCT1
Atp5h	3.90513e-110	0.329404	0.651	0.399	7.31587e-106	1	DCT1
Kl	3.32077e-108	0.3008	0.358	0.151	6.22114e-104	1	DCT1
Las1l	1.37682e-106	0.313859	0.375	0.164	2.57934e-102	1	DCT1
Cd9	2.10898e-106	0.261733	0.634	0.353	3.95096e-102	1	DCT1
Idh2	9.56881e-105	0.285612	0.428	0.206	1.79262e-100	1	DCT1
Ndufb8	4.29881e-104	0.307593	0.515	0.277	8.05338e-100	1	DCT1
Acadl	8.53018e-104	0.263741	0.497	0.259	1.59804e-99	1	DCT1
Uqcrfs1	1.3255e-103	0.298255	0.505	0.267	2.48319e-99	1	DCT1
Id2	7.7154e-103	0.395801	0.624	0.385	1.4454e-98	1	DCT1
Cd63	7.68261e-102	0.310111	0.837	0.584	1.43926e-97	1	DCT1
Ndufa13	3.73203e-100	0.302006	0.6	0.356	6.99158e-96	1	DCT1
Phldb2	5.7551e-97	0.2629	0.529	0.287	1.07816e-92	1	DCT1
Ndufb5	1.56893e-95	0.271322	0.44	0.224	2.93923e-91	1	DCT1
Mpc2	4.21634e-93	0.297783	0.575	0.338	7.89888e-89	1	DCT1
Acsl4	1.99919e-92	0.25523	0.362	0.168	3.74528e-88	1	DCT1
Itga6	1.84586e-90	0.261247	0.451	0.234	3.45803e-86	1	DCT1
Anxa5	6.96083e-90	0.32	0.534	0.314	1.30404e-85	1	DCT1
Prdx5	2.10064e-89	0.286669	0.742	0.493	3.93535e-85	1	DCT1
Kcnj16	1.37431e-87	0.254434	0.459	0.24	2.57464e-83	1	DCT1
Uqcr11	1.02122e-85	0.313668	0.595	0.374	1.91316e-81	1	DCT1
Zfp36l1	8.95731e-83	0.33194	0.775	0.581	1.67806e-78	1	DCT1
Sdhb	4.00158e-82	0.265573	0.434	0.231	7.49656e-78	1	DCT1
Uqcrb	4.416e-81	0.263377	0.603	0.375	8.27293e-77	1	DCT1
Atp5d	1.434e-80	0.271624	0.614	0.386	2.68645e-76	1	DCT1
Slc25a3	4.48989e-80	0.266855	0.692	0.472	8.41136e-76	1	DCT1
Atp5f1	5.62813e-80	0.283397	0.593	0.375	1.05437e-75	1	DCT1
Rcan1	3.71132e-79	0.292108	0.33	0.155	6.95279e-75	1	DCT1
Minos1	1.03144e-77	0.26485	0.584	0.361	1.9323e-73	1	DCT1
Nudt4	2.75621e-77	0.257252	0.587	0.356	5.16348e-73	1	DCT1
Mdh1	2.53143e-76	0.252482	0.606	0.375	4.74238e-72	1	DCT1
mt-Rnr2	1.10471e-69	0.266274	1	1	2.06957e-65	1	DCT1
Lcn2	4.51238e-60	0.411171	0.4	0.231	8.45349e-56	1	DCT1
Rtn4	9.91052e-56	0.262725	0.534	0.358	1.85664e-51	1	DCT1
S100a10	6.35846e-45	0.287614	0.65	0.498	1.19119e-40	1	DCT1
Hbegf	7.5775e-36	0.252851	0.545	0.405	1.41957e-31	1	DCT1
Ifrd1	1.64405e-25	0.276724	0.471	0.362	3.07996e-21	1	DCT1
Gpx3	0	2.63584	0.998	0.625	0	2	PT, S1/S2
Aldob	0	1.48311	0.913	0.179	0	2	PT, S1/S2
Acsm2	0	1.42463	0.921	0.189	0	2	PT, S1/S2
Slc34a1	0	1.31244	0.849	0.213	0	2	PT, S1/S2
Spink1	0	1.17438	0.833	0.145	0	2	PT, S1/S2
Slc4a4	0	1.12904	0.769	0.119	0	2	PT, S1/S2
Ass1	0	1.0921	0.702	0.115	0	2	PT, S1/S2
Ndrg1	0	1.08386	0.884	0.424	0	2	PT, S1/S2
Miox	0	1.03186	0.67	0.123	0	2	PT, S1/S2
Tmem27	0	0.993002	0.776	0.152	0	2	PT, S1/S2
Slc5a2	0	0.903955	0.623	0.052	0	2	PT, S1/S2
Slc13a1	0	0.884994	0.581	0.077	0	2	PT, S1/S2
Sult1d1	0	0.852551	0.72	0.166	0	2	PT, S1/S2
Lrp2	0	0.784477	0.63	0.101	0	2	PT, S1/S2
Lgmn	0	0.754417	0.738	0.294	0	2	PT, S1/S2
Glyat	0	0.754075	0.646	0.095	0	2	PT, S1/S2
Akr1c21	0	0.74759	0.542	0.084	0	2	PT, S1/S2
Fut9	0	0.730792	0.593	0.092	0	2	PT, S1/S2
Igfbp4	0	0.69141	0.599	0.116	0	2	PT, S1/S2
Keg1	0	0.681504	0.535	0.084	0	2	PT, S1/S2
Pdzk1	0	0.665353	0.538	0.075	0	2	PT, S1/S2
Maf	0	0.658148	0.618	0.138	0	2	PT, S1/S2
Sord	0	0.657137	0.565	0.094	0	2	PT, S1/S2
Slc27a2	0	0.649326	0.611	0.124	0	2	PT, S1/S2
4931406C07Rik	0	0.629929	0.572	0.125	0	2	PT, S1/S2
Dab2	0	0.62151	0.686	0.236	0	2	PT, S1/S2
Fbp1	0	0.610684	0.451	0.05	0	2	PT, S1/S2
Rida	0	0.605239	0.569	0.167	0	2	PT, S1/S2
Gsta2	0	0.602292	0.478	0.052	0	2	PT, S1/S2
Cyp2j5	0	0.58988	0.554	0.083	0	2	PT, S1/S2
Cyp24a1	0	0.56567	0.332	0.022	0	2	PT, S1/S2
Spp2	0	0.550972	0.363	0.018	0	2	PT, S1/S2
Ugt2b38	0	0.545996	0.458	0.068	0	2	PT, S1/S2
Idh1	0	0.532798	0.462	0.076	0	2	PT, S1/S2
Abcc2	0	0.524903	0.448	0.06	0	2	PT, S1/S2
Guca2b	0	0.520326	0.426	0.076	0	2	PT, S1/S2
Kcnj15	0	0.515999	0.467	0.067	0	2	PT, S1/S2
Dnase1	0	0.504448	0.333	0.035	0	2	PT, S1/S2
Tmem174	0	0.502233	0.446	0.052	0	2	PT, S1/S2
Nox4	0	0.494149	0.431	0.036	0	2	PT, S1/S2
Slc6a19	0	0.476958	0.345	0.031	0	2	PT, S1/S2
Mpp1	0	0.465763	0.41	0.064	0	2	PT, S1/S2
Cldn2	0	0.454064	0.418	0.064	0	2	PT, S1/S2
Pter	0	0.415601	0.376	0.058	0	2	PT, S1/S2
Slc5a12	0	0.383421	0.274	0.015	0	2	PT, S1/S2
Steap2	0	0.383396	0.356	0.057	0	2	PT, S1/S2
Pah	0	0.376125	0.336	0.055	0	2	PT, S1/S2
Snhg11	0	0.374613	0.261	0.02	0	2	PT, S1/S2
Slc17a1	0	0.367606	0.366	0.059	0	2	PT, S1/S2
Slc2a2	0	0.365096	0.322	0.024	0	2	PT, S1/S2
Dao	0	0.3528	0.343	0.046	0	2	PT, S1/S2
Gas2	0	0.341625	0.33	0.05	0	2	PT, S1/S2
Alpl	0	0.326896	0.291	0.036	0	2	PT, S1/S2
Hnf4a	0	0.317275	0.313	0.039	0	2	PT, S1/S2
Amn	0	0.31375	0.298	0.033	0	2	PT, S1/S2
Pcx	0	0.303844	0.282	0.038	0	2	PT, S1/S2
Cpn1	0	0.289668	0.252	0.022	0	2	PT, S1/S2
Slc22a1	0	0.284891	0.274	0.034	0	2	PT, S1/S2
Enpp2	4.01087e-306	0.342273	0.347	0.06	7.51396e-302	2	PT, S1/S2
Pck1	3.35219e-299	0.6455	0.412	0.089	6.28e-295	2	PT, S1/S2
Fmo2	1.59297e-288	0.282288	0.285	0.042	2.98427e-284	2	PT, S1/S2
Chpt1	1.87244e-288	0.641017	0.741	0.312	3.50784e-284	2	PT, S1/S2
Lipa	2.90303e-288	0.465887	0.483	0.125	5.43853e-284	2	PT, S1/S2
Abcg2	1.46595e-287	0.381573	0.424	0.095	2.74631e-283	2	PT, S1/S2
Akr1a1	3.29516e-286	0.756775	0.771	0.366	6.17314e-282	2	PT, S1/S2
Cda	2.89935e-283	0.331621	0.314	0.053	5.43164e-279	2	PT, S1/S2
Gk	7.32813e-283	0.356864	0.36	0.07	1.37285e-278	2	PT, S1/S2
Slc47a1	7.10196e-282	0.304006	0.312	0.052	1.33048e-277	2	PT, S1/S2
Folr1	4.60916e-280	0.310293	0.307	0.051	8.6348e-276	2	PT, S1/S2
Acox1	2.0678e-279	0.540907	0.526	0.153	3.87382e-275	2	PT, S1/S2
Rab11fip3	4.51794e-275	0.341545	0.314	0.055	8.46391e-271	2	PT, S1/S2
Sfxn1	1.37305e-274	0.358066	0.405	0.091	2.57227e-270	2	PT, S1/S2
Nr1h4	9.82123e-273	0.315269	0.293	0.048	1.83991e-268	2	PT, S1/S2
Slc17a3	2.66392e-271	0.323118	0.343	0.065	4.99059e-267	2	PT, S1/S2
Khk	7.15822e-259	0.369417	0.344	0.069	1.34102e-254	2	PT, S1/S2
Gpx1	8.99491e-253	0.970773	0.86	0.539	1.68511e-248	2	PT, S1/S2
Mfsd4b5	1.9644e-252	0.291172	0.296	0.052	3.6801e-248	2	PT, S1/S2
Slc22a18	3.43257e-244	0.291156	0.29	0.052	6.43058e-240	2	PT, S1/S2
Pecr	6.48591e-242	0.324073	0.27	0.045	1.21507e-237	2	PT, S1/S2
Cat	3.07243e-240	0.384383	0.447	0.122	5.75589e-236	2	PT, S1/S2
Gcnt1	3.20863e-237	0.314477	0.311	0.061	6.01105e-233	2	PT, S1/S2
Lactb2	1.49025e-236	0.364677	0.399	0.1	2.79184e-232	2	PT, S1/S2
Ugt3a2	2.7128e-233	0.290901	0.314	0.063	5.08217e-229	2	PT, S1/S2
Dbi	5.36653e-231	0.721139	0.788	0.441	1.00536e-226	2	PT, S1/S2
Tkfc	5.17825e-228	0.26863	0.261	0.045	9.70094e-224	2	PT, S1/S2
Fmo1	2.26128e-220	0.260756	0.261	0.046	4.23627e-216	2	PT, S1/S2
Dhcr24	1.66824e-214	0.300673	0.323	0.072	3.12528e-210	2	PT, S1/S2
Tcn2	1.55491e-212	0.412279	0.483	0.157	2.91296e-208	2	PT, S1/S2
Cryz	1.21914e-211	0.287691	0.303	0.064	2.28393e-207	2	PT, S1/S2
Bdh2	1.36008e-211	0.268142	0.256	0.046	2.54798e-207	2	PT, S1/S2
Sod3	7.77853e-210	0.251341	0.274	0.053	1.45723e-205	2	PT, S1/S2
Gm19950	3.28347e-209	0.294003	0.263	0.049	6.15125e-205	2	PT, S1/S2
Neu1	1.81654e-208	0.387586	0.428	0.126	3.40311e-204	2	PT, S1/S2
Me1	2.04986e-208	0.26	0.275	0.054	3.8402e-204	2	PT, S1/S2
Cryl1	5.4468e-208	0.264938	0.254	0.047	1.0204e-203	2	PT, S1/S2
Gstm5	6.71921e-208	0.38544	0.318	0.073	1.25878e-203	2	PT, S1/S2
Ttc36	9.15754e-208	0.452514	0.375	0.098	1.71557e-203	2	PT, S1/S2
Selenbp1	1.82816e-206	0.359788	0.371	0.096	3.42487e-202	2	PT, S1/S2
Calml4	2.87944e-203	0.328646	0.309	0.069	5.39435e-199	2	PT, S1/S2
Atp6v1b2	4.76739e-187	0.366449	0.426	0.136	8.93123e-183	2	PT, S1/S2
Selenop	2.94382e-186	0.478311	0.661	0.3	5.51495e-182	2	PT, S1/S2
Gstt2	8.53806e-186	0.414197	0.343	0.092	1.59952e-181	2	PT, S1/S2
Nus1	8.02725e-176	0.339038	0.41	0.131	1.50383e-171	2	PT, S1/S2
Cyp4b1	1.08732e-175	0.435874	0.529	0.195	2.03698e-171	2	PT, S1/S2
Hspd1	4.88959e-158	0.437217	0.611	0.293	9.16016e-154	2	PT, S1/S2
Aldh6a1	6.98142e-153	0.278959	0.332	0.098	1.3079e-148	2	PT, S1/S2
H6pd	1.71545e-148	0.255644	0.269	0.069	3.21372e-144	2	PT, S1/S2
Akr7a5	1.32055e-145	0.270258	0.294	0.082	2.47392e-141	2	PT, S1/S2
Mettl7a1	2.16057e-144	0.289526	0.337	0.105	4.04761e-140	2	PT, S1/S2
Fxyd2	1.09148e-142	0.355084	0.926	0.549	2.04477e-138	2	PT, S1/S2
Tmem252	1.61052e-139	0.305756	0.337	0.104	3.01716e-135	2	PT, S1/S2
Hspa9	1.60149e-138	0.433685	0.623	0.327	3.00023e-134	2	PT, S1/S2
Plin2	7.10364e-134	0.372468	0.337	0.11	1.3308e-129	2	PT, S1/S2
Aldh9a1	1.13947e-130	0.289396	0.326	0.106	2.13468e-126	2	PT, S1/S2
mt-Rnr1	2.69497e-124	0.625441	0.985	0.967	5.04876e-120	2	PT, S1/S2
Chd3	4.97899e-124	0.299608	0.447	0.184	9.32763e-120	2	PT, S1/S2
Alas1	4.28245e-123	0.270508	0.293	0.092	8.02274e-119	2	PT, S1/S2
Zbtb20	9.38626e-123	0.397744	0.609	0.317	1.75842e-118	2	PT, S1/S2
Ldhd	3.51797e-122	0.256373	0.349	0.119	6.59056e-118	2	PT, S1/S2
Hmox1	7.90975e-116	0.449818	0.328	0.115	1.48181e-111	2	PT, S1/S2
Esd	3.51662e-115	0.340631	0.467	0.21	6.58804e-111	2	PT, S1/S2
Acy3	8.54011e-115	0.314966	0.281	0.087	1.5999e-110	2	PT, S1/S2
Oxct1	1.04025e-113	0.354992	0.646	0.35	1.9488e-109	2	PT, S1/S2
Pdzk1ip1	2.31483e-111	0.326549	0.617	0.324	4.33661e-107	2	PT, S1/S2
Gipc2	1.18672e-110	0.252976	0.379	0.147	2.22321e-106	2	PT, S1/S2
Gclm	1.37052e-110	0.292433	0.415	0.171	2.56754e-106	2	PT, S1/S2
Lrpap1	1.73304e-105	0.256474	0.341	0.129	3.24668e-101	2	PT, S1/S2
Retreg1	4.33516e-105	0.269892	0.324	0.12	8.12148e-101	2	PT, S1/S2
mt-Rnr2	1.42544e-101	0.411906	1	1	2.67042e-97	2	PT, S1/S2
C130074G19Rik	8.33383e-97	0.254248	0.361	0.148	1.56126e-92	2	PT, S1/S2
Golga4	6.72743e-96	0.377507	0.617	0.362	1.26032e-91	2	PT, S1/S2
Myo6	1.0108e-90	0.273671	0.475	0.237	1.89364e-86	2	PT, S1/S2
Herpud1	1.65694e-86	0.286946	0.356	0.154	3.10412e-82	2	PT, S1/S2
Sars	2.296e-86	0.263086	0.378	0.17	4.30134e-82	2	PT, S1/S2
Etfb	8.9191e-84	0.313483	0.5	0.27	1.6709e-79	2	PT, S1/S2
Fth1	1.55544e-81	0.350188	0.963	0.889	2.91396e-77	2	PT, S1/S2
St13	6.89702e-80	0.298766	0.547	0.315	1.29209e-75	2	PT, S1/S2
Ctage5	1.24682e-79	0.309542	0.549	0.317	2.33579e-75	2	PT, S1/S2
Cyb5a	5.15199e-79	0.442161	0.47	0.252	9.65174e-75	2	PT, S1/S2
Tns1	8.00104e-76	0.310679	0.549	0.325	1.49892e-71	2	PT, S1/S2
Aldh2	1.30855e-74	0.256828	0.431	0.217	2.45144e-70	2	PT, S1/S2
Tnfaip8	8.80721e-72	0.268292	0.296	0.126	1.64994e-67	2	PT, S1/S2
Cgnl1	1.15745e-71	0.269381	0.453	0.242	2.16837e-67	2	PT, S1/S2
Errfi1	4.76728e-71	0.325099	0.538	0.311	8.93102e-67	2	PT, S1/S2
Park7	1.72299e-70	0.297676	0.481	0.269	3.22785e-66	2	PT, S1/S2
Prdx5	5.98166e-69	0.344488	0.717	0.5	1.1206e-64	2	PT, S1/S2
Hspe1	4.28307e-62	0.250469	0.466	0.265	8.0239e-58	2	PT, S1/S2
Sqstm1	1.26474e-59	0.367402	0.613	0.423	2.36936e-55	2	PT, S1/S2
Gm42418	3.20835e-59	0.480604	0.92	0.857	6.01053e-55	2	PT, S1/S2
Ftl1	1.23335e-58	0.423066	0.681	0.515	2.31057e-54	2	PT, S1/S2
Mdh1	4.79741e-58	0.287607	0.596	0.381	8.98746e-54	2	PT, S1/S2
Hint1	3.6009e-56	0.26648	0.525	0.328	6.74593e-52	2	PT, S1/S2
Cd63	5.95013e-54	0.269637	0.798	0.592	1.1147e-49	2	PT, S1/S2
mt-Nd2	5.72182e-49	0.265864	0.936	0.833	1.07193e-44	2	PT, S1/S2
Arl6ip1	2.36529e-47	0.278803	0.575	0.406	4.43113e-43	2	PT, S1/S2
Eif3a	3.97716e-45	0.302754	0.62	0.47	7.45082e-41	2	PT, S1/S2
Txnrd1	4.18416e-40	0.265516	0.467	0.312	7.8386e-36	2	PT, S1/S2
Malat1	5.10765e-36	0.342941	0.996	0.999	9.56866e-32	2	PT, S1/S2
Hsp90aa1	7.85669e-33	0.284278	0.726	0.612	1.47187e-28	2	PT, S1/S2
Cd74	0	2.60615	0.969	0.24	0	3	Mac
Apoe	0	2.2231	0.866	0.22	0	3	Mac
H2-Eb1	0	2.16132	0.864	0.113	0	3	Mac
Ccl4	0	2.14639	0.648	0.043	0	3	Mac
H2-Ab1	0	2.07404	0.876	0.152	0	3	Mac
H2-Aa	0	1.96923	0.846	0.093	0	3	Mac
Il1b	0	1.92944	0.822	0.108	0	3	Mac
C1qb	0	1.89399	0.969	0.054	0	3	Mac
Cxcl2	0	1.88744	0.742	0.127	0	3	Mac
C1qa	0	1.73931	0.944	0.039	0	3	Mac
C1qc	0	1.5031	0.888	0.035	0	3	Mac
Ctss	0	1.48913	0.941	0.093	0	3	Mac
Ccl3	0	1.46769	0.525	0.026	0	3	Mac
Cd14	0	1.34917	0.789	0.104	0	3	Mac
Lyz2	0	1.33706	0.843	0.138	0	3	Mac
Cd83	0	1.32056	0.752	0.064	0	3	Mac
Fth1	0	1.30331	0.996	0.886	0	3	Mac
Rgs1	0	1.28713	0.623	0.035	0	3	Mac
Tmsb4x	0	1.23549	0.998	0.587	0	3	Mac
Lcp1	0	1.05941	0.719	0.077	0	3	Mac
Laptm5	0	1.05339	0.78	0.087	0	3	Mac
Tyrobp	0	1.02057	0.791	0.09	0	3	Mac
Lilr4b	0	1.01535	0.685	0.067	0	3	Mac
Plek	0	1.00191	0.696	0.079	0	3	Mac
Fcer1g	0	1.00104	0.702	0.078	0	3	Mac
Ctsb	0	0.976347	0.829	0.462	0	3	Mac
Lilrb4a	0	0.946178	0.679	0.072	0	3	Mac
B2m	0	0.936618	0.97	0.502	0	3	Mac
Fyb	0	0.897197	0.653	0.059	0	3	Mac
Pf4	0	0.86456	0.395	0.022	0	3	Mac
Cst3	0	0.833489	0.893	0.503	0	3	Mac
Ctsc	0	0.829058	0.662	0.143	0	3	Mac
Aif1	0	0.822501	0.583	0.03	0	3	Mac
Mpeg1	0	0.81208	0.614	0.053	0	3	Mac
Cxcl16	0	0.79488	0.618	0.158	0	3	Mac
Ms4a7	0	0.785238	0.48	0.02	0	3	Mac
Cybb	0	0.774229	0.586	0.05	0	3	Mac
Cebpb	0	0.771033	0.713	0.276	0	3	Mac
Mrc1	0	0.749519	0.487	0.034	0	3	Mac
Wfdc17	0	0.737037	0.459	0.059	0	3	Mac
Marcks	0	0.731775	0.645	0.147	0	3	Mac
Srgn	0	0.730094	0.736	0.216	0	3	Mac
Cd52	0	0.729879	0.625	0.077	0	3	Mac
Basp1	0	0.724426	0.525	0.064	0	3	Mac
Ccl12	0	0.721895	0.262	0.007	0	3	Mac
Slc15a3	0	0.643313	0.484	0.045	0	3	Mac
Kctd12	0	0.634906	0.483	0.115	0	3	Mac
Ptprc	0	0.616602	0.55	0.075	0	3	Mac
Slfn2	0	0.613847	0.49	0.08	0	3	Mac
Ly86	0	0.593905	0.458	0.031	0	3	Mac
Clec7a	0	0.586213	0.4	0.059	0	3	Mac
Ctsz	0	0.585342	0.509	0.128	0	3	Mac
Mafb	0	0.574132	0.41	0.069	0	3	Mac
Cd72	0	0.569539	0.366	0.01	0	3	Mac
Fcgr2b	0	0.561655	0.426	0.048	0	3	Mac
Ccl2	0	0.534294	0.274	0.033	0	3	Mac
Ifi207	0	0.531851	0.392	0.044	0	3	Mac
Efhd2	0	0.531098	0.473	0.099	0	3	Mac
Coro1a	0	0.527155	0.433	0.058	0	3	Mac
Unc93b1	0	0.52216	0.449	0.057	0	3	Mac
Bcl2a1b	0	0.51329	0.39	0.027	0	3	Mac
Trf	0	0.5008	0.373	0.033	0	3	Mac
Csf1r	0	0.500175	0.398	0.036	0	3	Mac
Tgfbi	0	0.488791	0.367	0.047	0	3	Mac
Slamf7	0	0.458529	0.295	0.015	0	3	Mac
Mgl2	0	0.454014	0.283	0.012	0	3	Mac
Hcls1	0	0.452847	0.356	0.036	0	3	Mac
Ccrl2	0	0.450093	0.315	0.031	0	3	Mac
Ifi27l2a	0	0.44905	0.329	0.045	0	3	Mac
C5ar1	0	0.443292	0.347	0.022	0	3	Mac
Cd68	0	0.430474	0.349	0.04	0	3	Mac
Arrb2	0	0.426777	0.344	0.036	0	3	Mac
Nlrp3	0	0.426485	0.294	0.023	0	3	Mac
Ms4a6c	0	0.422735	0.367	0.046	0	3	Mac
Fcgr3	0	0.420472	0.336	0.027	0	3	Mac
Rgs10	0	0.407608	0.315	0.023	0	3	Mac
Cx3cr1	0	0.402675	0.291	0.013	0	3	Mac
H2-DMb1	0	0.396376	0.287	0.035	0	3	Mac
Itgam	0	0.394804	0.344	0.046	0	3	Mac
H2-DMa	0	0.387672	0.3	0.033	0	3	Mac
Pld4	0	0.385327	0.301	0.031	0	3	Mac
C3ar1	0	0.369164	0.292	0.013	0	3	Mac
Ccr5	0	0.352674	0.283	0.024	0	3	Mac
Tlr2	0	0.349817	0.268	0.03	0	3	Mac
Stap1	0	0.349479	0.275	0.033	0	3	Mac
Adgre1	0	0.345492	0.261	0.011	0	3	Mac
Plbd1	0	0.338732	0.281	0.036	0	3	Mac
Cd300c2	0	0.338508	0.275	0.022	0	3	Mac
Cyth4	0	0.320304	0.279	0.032	0	3	Mac
Gpr65	0	0.307503	0.251	0.015	0	3	Mac
Slc11a1	0	0.302485	0.262	0.024	0	3	Mac
Pim1	3.38778e-302	0.557469	0.507	0.132	6.34667e-298	3	Mac
Alox5ap	3.31886e-301	0.372532	0.331	0.052	6.21755e-297	3	Mac
Tm6sf1	8.39026e-289	0.329276	0.266	0.036	1.57183e-284	3	Mac
Jdp2	1.31063e-288	0.480435	0.337	0.059	2.45533e-284	3	Mac
Rel	7.32531e-280	0.451511	0.378	0.077	1.37232e-275	3	Mac
Stab1	1.15584e-274	0.411294	0.273	0.04	2.16535e-270	3	Mac
H3f3b	1.07476e-272	0.869033	0.892	0.634	2.01346e-268	3	Mac
Cd53	8.39421e-272	0.305112	0.283	0.043	1.57257e-267	3	Mac
Celf2	1.95851e-263	0.311932	0.307	0.052	3.66907e-259	3	Mac
Neurl3	2.65314e-260	0.351593	0.273	0.042	4.9704e-256	3	Mac
Ptgs2	1.22937e-256	0.474182	0.274	0.043	2.30309e-252	3	Mac
Cotl1	1.09595e-238	0.453335	0.41	0.102	2.05316e-234	3	Mac
Npc2	1.01946e-235	0.572809	0.618	0.238	1.90986e-231	3	Mac
Tnfaip3	4.31921e-234	0.396976	0.326	0.067	8.09161e-230	3	Mac
Dusp1	6.97913e-232	0.69088	0.654	0.27	1.30747e-227	3	Mac
Actb	3.63635e-227	0.674248	0.988	0.891	6.81234e-223	3	Mac
Fxyd5	6.47265e-225	0.455722	0.495	0.146	1.21259e-220	3	Mac
Nfkbiz	2.50578e-217	0.696205	0.621	0.262	4.69433e-213	3	Mac
Ccl6	8.74391e-217	0.256991	0.314	0.062	1.63808e-212	3	Mac
Rps24	5.21699e-213	0.604177	0.889	0.629	9.77351e-209	3	Mac
Dab2	1.74589e-203	0.596561	0.603	0.244	3.27074e-199	3	Mac
Psap	6.29884e-198	0.610316	0.697	0.351	1.18002e-193	3	Mac
Ftl1	6.82448e-198	0.970617	0.789	0.507	1.2785e-193	3	Mac
Myo5a	1.26784e-197	0.29287	0.255	0.048	2.37517e-193	3	Mac
Cyba	7.41599e-195	0.537872	0.627	0.266	1.38931e-190	3	Mac
Hexa	7.73781e-193	0.362589	0.316	0.074	1.4496e-188	3	Mac
Rplp1	2.0218e-192	0.562519	0.888	0.67	3.78763e-188	3	Mac
Lgmn	2.16512e-190	0.557175	0.653	0.303	4.05614e-186	3	Mac
Hexb	2.57438e-190	0.418958	0.384	0.108	4.82284e-186	3	Mac
Nfkbia	7.56044e-189	0.739877	0.731	0.396	1.41637e-184	3	Mac
Ctsh	7.77495e-187	0.401421	0.394	0.115	1.45656e-182	3	Mac
Cd36	8.20255e-185	0.427033	0.295	0.068	1.53666e-180	3	Mac
Ucp2	1.31081e-183	0.471745	0.481	0.172	2.45567e-179	3	Mac
Csf2ra	4.28001e-177	0.322622	0.291	0.068	8.01816e-173	3	Mac
Zeb2	6.68202e-177	0.381768	0.374	0.108	1.25181e-172	3	Mac
Ccl9	2.39598e-175	0.346154	0.267	0.056	4.48864e-171	3	Mac
H2-K1	3.39668e-175	0.581498	0.766	0.45	6.36334e-171	3	Mac
H2-D1	3.51043e-173	0.540167	0.793	0.457	6.57645e-169	3	Mac
Zfp36	7.12617e-161	0.748381	0.752	0.458	1.33502e-156	3	Mac
Stk17b	4.53212e-159	0.311699	0.299	0.077	8.49047e-155	3	Mac
Rps9	1.45051e-157	0.515767	0.87	0.636	2.71739e-153	3	Mac
Skil	1.34147e-154	0.418446	0.417	0.146	2.5131e-150	3	Mac
Arhgdib	3.90503e-153	0.275525	0.287	0.072	7.31568e-149	3	Mac
Grn	1.69342e-150	0.397531	0.422	0.152	3.17246e-146	3	Mac
Pla2g7	2.13782e-144	0.292327	0.251	0.06	4.00499e-140	3	Mac
Snx5	1.13205e-143	0.319145	0.327	0.098	2.12078e-139	3	Mac
Junb	1.62241e-141	0.562676	0.769	0.485	3.03942e-137	3	Mac
Metrnl	5.38124e-139	0.287453	0.268	0.07	1.00812e-134	3	Mac
Gm8995	3.8946e-138	0.326658	0.349	0.108	7.29614e-134	3	Mac
Ier5	5.36753e-137	0.477254	0.45	0.182	1.00555e-132	3	Mac
Rps29	1.3359e-136	0.494809	0.73	0.476	2.50267e-132	3	Mac
Hspa5	1.80969e-134	0.734859	0.844	0.696	3.39027e-130	3	Mac
Rpl13	6.0987e-131	0.440397	0.898	0.727	1.14253e-126	3	Mac
Actr3	2.31693e-125	0.401846	0.465	0.202	4.34055e-121	3	Mac
Calm1	1.83567e-124	0.485217	0.898	0.734	3.43895e-120	3	Mac
Maf	7.55106e-124	0.365413	0.41	0.156	1.41462e-119	3	Mac
Fau	4.4835e-120	0.423333	0.709	0.438	8.39938e-116	3	Mac
Rpl32	1.04227e-119	0.45945	0.802	0.578	1.95259e-115	3	Mac
Ctsa	3.28966e-115	0.32996	0.374	0.142	6.16285e-111	3	Mac
Rps12	2.502e-114	0.436465	0.712	0.458	4.68724e-110	3	Mac
Bst2	1.1752e-112	0.342794	0.358	0.132	2.20163e-108	3	Mac
Picalm	8.3348e-112	0.405363	0.55	0.284	1.56144e-107	3	Mac
Rps27a	1.39622e-104	0.402251	0.739	0.497	2.61568e-100	3	Mac
Sdcbp	1.0511e-103	0.369923	0.465	0.22	1.96912e-99	3	Mac
Arpc1b	5.21271e-100	0.386338	0.616	0.349	9.7655e-96	3	Mac
Rps8	1.53503e-98	0.404296	0.836	0.682	2.87573e-94	3	Mac
Rps20	2.00102e-96	0.391769	0.686	0.454	3.7487e-92	3	Mac
Creg1	3.76261e-93	0.341445	0.317	0.122	7.04887e-89	3	Mac
Pfn1	1.30623e-92	0.44492	0.691	0.465	2.44708e-88	3	Mac
Rpsa	1.58137e-91	0.414665	0.7	0.482	2.96254e-87	3	Mac
Rps25	1.83723e-90	0.375371	0.699	0.481	3.44187e-86	3	Mac
Ifrd1	3.93e-90	0.457185	0.597	0.355	7.36246e-86	3	Mac
Mbnl1	5.59523e-89	0.3211	0.367	0.159	1.04821e-84	3	Mac
Gnai2	2.51747e-87	0.329101	0.593	0.332	4.71622e-83	3	Mac
Mcl1	2.51832e-87	0.393671	0.615	0.381	4.71783e-83	3	Mac
Kdm6b	4.93427e-87	0.333241	0.365	0.16	9.24386e-83	3	Mac
Psmb8	3.81225e-85	0.253782	0.27	0.097	7.14188e-81	3	Mac
Rplp2	1.42381e-83	0.336756	0.693	0.465	2.66736e-79	3	Mac
Rps28	3.74575e-83	0.345272	0.656	0.434	7.01729e-79	3	Mac
Rpl18a	2.49523e-80	0.341823	0.679	0.453	4.67456e-76	3	Mac
Rpl17	1.2568e-76	0.354035	0.709	0.509	2.3545e-72	3	Mac
Rps19	2.61558e-73	0.364321	0.738	0.553	4.90003e-69	3	Mac
Rpl12	1.84609e-71	0.338288	0.53	0.318	3.45847e-67	3	Mac
Rps26	3.29632e-70	0.353182	0.693	0.506	6.17532e-66	3	Mac
Hmox1	1.03968e-69	0.670565	0.279	0.12	1.94774e-65	3	Mac
Tpd52	4.34964e-67	0.314511	0.458	0.255	8.14862e-63	3	Mac
Rps27	6.26263e-67	0.328728	0.729	0.544	1.17324e-62	3	Mac
Nfe2l2	2.85306e-66	0.348469	0.554	0.356	5.34493e-62	3	Mac
Rps14	7.23558e-66	0.331993	0.802	0.637	1.35551e-61	3	Mac
Rpl39	1.0129e-65	0.303184	0.588	0.38	1.89756e-61	3	Mac
Rrbp1	5.14565e-65	0.426676	0.636	0.473	9.63986e-61	3	Mac
Selenop	3.78557e-64	0.432041	0.513	0.313	7.09188e-60	3	Mac
Rap1b	2.72549e-63	0.279345	0.377	0.193	5.10593e-59	3	Mac
Rgs2	9.43677e-63	0.336785	0.346	0.168	1.76789e-58	3	Mac
Irf2bp2	1.32361e-62	0.275491	0.334	0.162	2.47965e-58	3	Mac
Tpm3	2.38217e-61	0.320932	0.733	0.554	4.46276e-57	3	Mac
Rps15a	6.92727e-61	0.311216	0.616	0.428	1.29775e-56	3	Mac
Grb2	8.68522e-61	0.259553	0.329	0.159	1.62709e-56	3	Mac
Arpc2	1.46452e-58	0.333699	0.676	0.505	2.74363e-54	3	Mac
Hmgb2	4.64927e-58	0.286172	0.331	0.165	8.70994e-54	3	Mac
Cdkn1a	1.37493e-57	0.278411	0.559	0.338	2.5758e-53	3	Mac
Rack1	4.73345e-57	0.323741	0.596	0.415	8.86764e-53	3	Mac
Rps3	1.86442e-55	0.297414	0.792	0.653	3.49281e-51	3	Mac
Rps4x	8.19249e-55	0.298842	0.613	0.423	1.53478e-50	3	Mac
Rps5	4.71746e-53	0.329717	0.689	0.523	8.83769e-49	3	Mac
Rpl22	1.34964e-51	0.294181	0.57	0.396	2.52841e-47	3	Mac
Gadd45b	5.79331e-49	0.265688	0.403	0.228	1.08532e-44	3	Mac
Ubc	2.84027e-48	0.373455	0.852	0.755	5.32097e-44	3	Mac
Rps13	1.60678e-47	0.275689	0.564	0.391	3.01013e-43	3	Mac
Rpl11	8.71571e-47	0.28732	0.713	0.581	1.6328e-42	3	Mac
Rpl26	3.70497e-46	0.274347	0.669	0.514	6.9409e-42	3	Mac
Rpl3	5.58217e-46	0.286802	0.674	0.518	1.04576e-41	3	Mac
Rpl14	5.33035e-45	0.281184	0.75	0.631	9.98588e-41	3	Mac
Hspa8	5.53875e-45	0.347175	0.821	0.749	1.03763e-40	3	Mac
Cfl1	6.65315e-45	0.295257	0.642	0.485	1.2464e-40	3	Mac
Zfand5	1.213e-40	0.298202	0.579	0.419	2.27244e-36	3	Mac
Rpl4	2.29755e-40	0.263028	0.74	0.62	4.30423e-36	3	Mac
Id2	6.95918e-32	0.300245	0.53	0.398	1.30373e-27	3	Mac
Gm42418	1.50782e-31	0.360941	0.888	0.86	2.82474e-27	3	Mac
Lpl	5.54662e-29	0.279901	0.377	0.244	1.0391e-24	3	Mac
Hsp90b1	1.10817e-25	0.276729	0.736	0.674	2.07604e-21	3	Mac
Hspa1a	1.50601e-16	0.530206	0.309	0.227	2.82136e-12	3	Mac
Calr	1.16656e-15	0.250754	0.58	0.522	2.18544e-11	3	Mac
Hspa1b	3.7006e-07	0.55736	0.276	0.237	0.0069327	3	Mac
Kap	0	3.17912	0.953	0.426	0	4	PT, S2/S3
Acsm2	0	1.57821	0.95	0.192	0	4	PT, S2/S3
Slc27a2	0	1.30331	0.881	0.107	0	4	PT, S2/S3
Aldob	0	1.27284	0.91	0.184	0	4	PT, S2/S3
Slc34a1	0	1.22793	0.883	0.215	0	4	PT, S2/S3
Cyp4b1	0	1.17775	0.831	0.175	0	4	PT, S2/S3
Miox	0	1.06245	0.753	0.12	0	4	PT, S2/S3
Chpt1	0	1.01826	0.867	0.305	0	4	PT, S2/S3
Acy3	0	1.01241	0.621	0.063	0	4	PT, S2/S3
Akr1c21	0	0.977374	0.657	0.079	0	4	PT, S2/S3
Spink1	0	0.939325	0.747	0.156	0	4	PT, S2/S3
Cyp2e1	0	0.932182	0.559	0.033	0	4	PT, S2/S3
Pck1	0	0.931576	0.593	0.078	0	4	PT, S2/S3
Ttc36	0	0.919132	0.617	0.082	0	4	PT, S2/S3
Gpx3	0	0.902703	0.994	0.628	0	4	PT, S2/S3
Tmem27	0	0.880867	0.761	0.158	0	4	PT, S2/S3
Cndp2	0	0.835924	0.598	0.113	0	4	PT, S2/S3
Napsa	0	0.819797	0.544	0.057	0	4	PT, S2/S3
Ass1	0	0.808364	0.696	0.119	0	4	PT, S2/S3
Sult1d1	0	0.792954	0.739	0.169	0	4	PT, S2/S3
Inmt	0	0.792817	0.519	0.045	0	4	PT, S2/S3
Rida	0	0.784655	0.685	0.161	0	4	PT, S2/S3
Ggt1	0	0.772973	0.661	0.102	0	4	PT, S2/S3
Keg1	0	0.755683	0.596	0.083	0	4	PT, S2/S3
Cyp2j5	0	0.747031	0.656	0.079	0	4	PT, S2/S3
Lrp2	0	0.744857	0.679	0.101	0	4	PT, S2/S3
Ldhd	0	0.716192	0.609	0.102	0	4	PT, S2/S3
Ugt2b38	0	0.693006	0.573	0.062	0	4	PT, S2/S3
Slc22a6	0	0.69264	0.528	0.026	0	4	PT, S2/S3
Glyat	0	0.690826	0.652	0.099	0	4	PT, S2/S3
Slc7a13	0	0.681814	0.419	0.013	0	4	PT, S2/S3
4931406C07Rik	0	0.663012	0.637	0.123	0	4	PT, S2/S3
Acox1	0	0.653733	0.627	0.148	0	4	PT, S2/S3
Guca2b	0	0.6472	0.522	0.072	0	4	PT, S2/S3
Slc17a3	0	0.635608	0.566	0.05	0	4	PT, S2/S3
Mep1a	0	0.633933	0.49	0.035	0	4	PT, S2/S3
Nudt19	0	0.63356	0.463	0.083	0	4	PT, S2/S3
Ces1f	0	0.621108	0.496	0.029	0	4	PT, S2/S3
Ugt3a2	0	0.609863	0.537	0.048	0	4	PT, S2/S3
Abcc2	0	0.592753	0.488	0.06	0	4	PT, S2/S3
Slc13a1	0	0.561665	0.529	0.084	0	4	PT, S2/S3
Cat	0	0.557835	0.565	0.116	0	4	PT, S2/S3
Slc4a4	0	0.550811	0.631	0.134	0	4	PT, S2/S3
Khk	0	0.539177	0.455	0.063	0	4	PT, S2/S3
Pdzk1	0	0.537782	0.522	0.079	0	4	PT, S2/S3
Tmigd1	0	0.526086	0.403	0.027	0	4	PT, S2/S3
Mfsd4b5	0	0.516548	0.472	0.04	0	4	PT, S2/S3
Sord	0	0.515505	0.539	0.099	0	4	PT, S2/S3
Gm19950	0	0.511373	0.437	0.038	0	4	PT, S2/S3
Lactb2	0	0.505626	0.51	0.094	0	4	PT, S2/S3
Slc6a18	0	0.502537	0.431	0.035	0	4	PT, S2/S3
Acsm3	0	0.502286	0.323	0.01	0	4	PT, S2/S3
Kcnj15	0	0.502255	0.496	0.068	0	4	PT, S2/S3
Slc17a1	0	0.501307	0.473	0.053	0	4	PT, S2/S3
Slc22a12	0	0.493718	0.43	0.021	0	4	PT, S2/S3
Fbp1	0	0.480219	0.423	0.055	0	4	PT, S2/S3
Tmem174	0	0.474027	0.427	0.056	0	4	PT, S2/S3
Acaa1b	0	0.470233	0.411	0.037	0	4	PT, S2/S3
Pter	0	0.454606	0.438	0.056	0	4	PT, S2/S3
Slc13a3	0	0.453426	0.398	0.026	0	4	PT, S2/S3
Nat8f1	0	0.449917	0.356	0.038	0	4	PT, S2/S3
Fut9	0	0.443106	0.489	0.103	0	4	PT, S2/S3
Aass	0	0.438998	0.411	0.036	0	4	PT, S2/S3
Me1	0	0.428448	0.415	0.045	0	4	PT, S2/S3
Slco1a1	0	0.427808	0.287	0.006	0	4	PT, S2/S3
Gk	0	0.423175	0.413	0.068	0	4	PT, S2/S3
Ephx2	0	0.416731	0.381	0.039	0	4	PT, S2/S3
Mettl7b	0	0.411826	0.363	0.028	0	4	PT, S2/S3
Slc47a1	0	0.410329	0.404	0.047	0	4	PT, S2/S3
Pecr	0	0.402078	0.363	0.04	0	4	PT, S2/S3
Slc22a18	0	0.392031	0.387	0.046	0	4	PT, S2/S3
Pah	0	0.391307	0.359	0.055	0	4	PT, S2/S3
Cda	0	0.388685	0.383	0.05	0	4	PT, S2/S3
Fah	0	0.380489	0.347	0.049	0	4	PT, S2/S3
Slc22a2	0	0.370151	0.334	0.017	0	4	PT, S2/S3
Sod3	0	0.366301	0.348	0.049	0	4	PT, S2/S3
Slc22a30	0	0.362463	0.305	0.022	0	4	PT, S2/S3
Gas2	0	0.351054	0.354	0.05	0	4	PT, S2/S3
Hao2	0	0.345936	0.284	0.028	0	4	PT, S2/S3
Mpv17l	0	0.345936	0.291	0.028	0	4	PT, S2/S3
Dao	0	0.345735	0.348	0.048	0	4	PT, S2/S3
Folr1	0	0.342916	0.334	0.051	0	4	PT, S2/S3
Nat8	0	0.338467	0.272	0.015	0	4	PT, S2/S3
Gm45792	0	0.328373	0.264	0.013	0	4	PT, S2/S3
Tkfc	0	0.318776	0.316	0.042	0	4	PT, S2/S3
Hnf4a	0	0.313017	0.315	0.041	0	4	PT, S2/S3
Aldh8a1	0	0.311961	0.268	0.025	0	4	PT, S2/S3
Slc22a8	0	0.302088	0.254	0.026	0	4	PT, S2/S3
Fmo2	0	0.295947	0.32	0.041	0	4	PT, S2/S3
Slc22a1	0	0.289334	0.295	0.034	0	4	PT, S2/S3
Serpinf2	0	0.28477	0.258	0.019	0	4	PT, S2/S3
Cyp2j13	0	0.280459	0.274	0.022	0	4	PT, S2/S3
Cideb	0	0.272712	0.269	0.029	0	4	PT, S2/S3
Hgd	0	0.269751	0.251	0.028	0	4	PT, S2/S3
Abcg2	9.8543e-301	0.403346	0.445	0.095	1.84611e-296	4	PT, S2/S3
Osgin1	5.75765e-297	0.487036	0.312	0.048	1.07864e-292	4	PT, S2/S3
Cyb5a	6.11645e-290	0.636029	0.675	0.238	1.14586e-285	4	PT, S2/S3
Gss	2.53898e-288	0.328013	0.344	0.059	4.75653e-284	4	PT, S2/S3
Pipox	3.77767e-284	0.279642	0.272	0.037	7.07709e-280	4	PT, S2/S3
Cryz	6.76127e-279	0.320169	0.348	0.063	1.26666e-274	4	PT, S2/S3
Xylb	2.12306e-278	0.263387	0.252	0.032	3.97734e-274	4	PT, S2/S3
Selenbp1	3.60194e-274	0.435889	0.423	0.094	6.74787e-270	4	PT, S2/S3
Adh1	1.5186e-272	0.381307	0.373	0.072	2.84494e-268	4	PT, S2/S3
Aldh6a1	6.57185e-266	0.365993	0.415	0.094	1.23117e-261	4	PT, S2/S3
Mlxipl	2.05765e-265	0.293865	0.275	0.04	3.85481e-261	4	PT, S2/S3
Ghr	4.59603e-254	0.342981	0.347	0.069	8.61021e-250	4	PT, S2/S3
Nr1h4	1.01879e-253	0.291457	0.296	0.049	1.90861e-249	4	PT, S2/S3
Bdh2	1.12244e-252	0.277342	0.285	0.046	2.10279e-248	4	PT, S2/S3
Gclm	1.15324e-251	0.490284	0.538	0.164	2.16048e-247	4	PT, S2/S3
Calml4	1.95113e-248	0.351347	0.345	0.068	3.65525e-244	4	PT, S2/S3
Adhfe1	1.99682e-245	0.269627	0.273	0.043	3.74084e-241	4	PT, S2/S3
Igfbp4	1.07319e-240	0.39946	0.478	0.128	2.01052e-236	4	PT, S2/S3
Selenop	8.89827e-236	0.63113	0.708	0.299	1.667e-231	4	PT, S2/S3
Lap3	8.22329e-234	0.34704	0.386	0.09	1.54055e-229	4	PT, S2/S3
mt-Rnr1	1.58239e-231	0.974626	0.997	0.966	2.96445e-227	4	PT, S2/S3
Fmo1	8.7528e-231	0.263164	0.276	0.047	1.63975e-226	4	PT, S2/S3
Dnase1	3.0125e-228	0.379966	0.262	0.043	5.64361e-224	4	PT, S2/S3
Gcnt1	2.50707e-222	0.31239	0.314	0.063	4.69674e-218	4	PT, S2/S3
Ces1d	1.14254e-220	0.264718	0.26	0.043	2.14043e-216	4	PT, S2/S3
Atp11a	1.08408e-212	0.469186	0.433	0.125	2.03091e-208	4	PT, S2/S3
Pank1	1.96595e-212	0.30299	0.283	0.054	3.68302e-208	4	PT, S2/S3
Ccdc107	7.24839e-210	0.359417	0.415	0.112	1.35791e-205	4	PT, S2/S3
Tmem252	1.02429e-209	0.399925	0.399	0.101	1.9189e-205	4	PT, S2/S3
Gsta2	1.6764e-207	0.357321	0.316	0.067	3.14057e-203	4	PT, S2/S3
Gstm5	2.35624e-205	0.356953	0.329	0.074	4.41419e-201	4	PT, S2/S3
Ddah1	1.68667e-201	0.251606	0.289	0.058	3.15981e-197	4	PT, S2/S3
Gcdh	4.44573e-200	0.261063	0.267	0.05	8.32863e-196	4	PT, S2/S3
Ndrg1	7.71836e-193	0.597866	0.801	0.433	1.44596e-188	4	PT, S2/S3
Cd36	5.15719e-189	0.262346	0.308	0.067	9.66148e-185	4	PT, S2/S3
Akr1a1	2.2618e-185	0.553835	0.728	0.372	4.23726e-181	4	PT, S2/S3
Mpp1	2.20913e-182	0.279139	0.315	0.073	4.13859e-178	4	PT, S2/S3
Gpx1	4.50669e-180	0.817758	0.833	0.543	8.44283e-176	4	PT, S2/S3
mt-Rnr2	1.85931e-170	0.567923	1	1	3.48322e-166	4	PT, S2/S3
Cldn2	1.11121e-163	0.257422	0.304	0.074	2.08174e-159	4	PT, S2/S3
Zbtb20	8.07701e-161	0.450148	0.668	0.314	1.51315e-156	4	PT, S2/S3
Sfxn1	1.57672e-160	0.276659	0.348	0.097	2.95382e-156	4	PT, S2/S3
Mettl7a1	8.159e-157	0.285665	0.361	0.105	1.52851e-152	4	PT, S2/S3
Gstt2	3.50346e-153	0.337131	0.334	0.094	6.56338e-149	4	PT, S2/S3
Ugdh	1.73693e-152	0.257611	0.272	0.065	3.25397e-148	4	PT, S2/S3
Lpl	3.927e-151	0.376056	0.562	0.231	7.35685e-147	4	PT, S2/S3
Chd3	5.56723e-150	0.323436	0.486	0.183	1.04297e-145	4	PT, S2/S3
Dbi	7.04959e-148	0.588267	0.74	0.446	1.32067e-143	4	PT, S2/S3
Plin2	3.20432e-144	0.448224	0.353	0.111	6.00297e-140	4	PT, S2/S3
Acat1	5.85192e-142	0.448724	0.561	0.254	1.0963e-137	4	PT, S2/S3
Aldh9a1	6.90525e-142	0.264487	0.348	0.106	1.29363e-137	4	PT, S2/S3
Dhrs4	1.08099e-140	0.262064	0.309	0.087	2.02513e-136	4	PT, S2/S3
Tcn2	1.70375e-136	0.311913	0.438	0.162	3.19181e-132	4	PT, S2/S3
Akr7a5	2.11849e-136	0.261667	0.297	0.083	3.96877e-132	4	PT, S2/S3
Aldh2	5.13458e-133	0.370056	0.502	0.213	9.61911e-129	4	PT, S2/S3
Hmgcs1	6.05468e-133	0.286306	0.374	0.125	1.13428e-128	4	PT, S2/S3
Sod1	1.87107e-131	0.417174	0.595	0.295	3.50526e-127	4	PT, S2/S3
Grina	7.56004e-131	0.291396	0.423	0.156	1.4163e-126	4	PT, S2/S3
Acadm	6.50089e-125	0.396402	0.502	0.222	1.21788e-120	4	PT, S2/S3
Neu1	2.44036e-124	0.263403	0.379	0.132	4.57177e-120	4	PT, S2/S3
Stard10	1.74858e-123	0.263483	0.335	0.109	3.27579e-119	4	PT, S2/S3
Por	1.35274e-121	0.27606	0.371	0.132	2.53423e-117	4	PT, S2/S3
Slc20a1	2.75531e-117	0.283077	0.292	0.089	5.1618e-113	4	PT, S2/S3
mt-Nd2	8.13997e-113	0.631984	0.955	0.832	1.52494e-108	4	PT, S2/S3
Mettl26	1.19001e-112	0.259942	0.346	0.121	2.22936e-108	4	PT, S2/S3
Hspd1	3.78075e-111	0.408451	0.576	0.298	7.08286e-107	4	PT, S2/S3
Slc25a39	4.88433e-106	0.272675	0.414	0.168	9.1503e-102	4	PT, S2/S3
Hspe1	8.57363e-105	0.376079	0.526	0.262	1.60618e-100	4	PT, S2/S3
Gclc	1.38784e-100	0.447153	0.417	0.184	2.59998e-96	4	PT, S2/S3
Hspa9	6.00131e-99	0.360635	0.604	0.33	1.12428e-94	4	PT, S2/S3
mt-Nd1	9.0084e-98	0.577683	0.924	0.766	1.68763e-93	4	PT, S2/S3
Gstm1	1.46415e-93	0.25682	0.357	0.141	2.74294e-89	4	PT, S2/S3
Sqstm1	4.80693e-93	0.561131	0.658	0.421	9.0053e-89	4	PT, S2/S3
mt-Nd5	5.6453e-92	0.540021	0.971	0.875	1.05759e-87	4	PT, S2/S3
Etfb	9.59271e-91	0.314236	0.522	0.27	1.7971e-86	4	PT, S2/S3
Esd	1.86963e-90	0.302286	0.453	0.213	3.50257e-86	4	PT, S2/S3
mt-Cytb	5.19449e-83	0.485901	0.971	0.883	9.73135e-79	4	PT, S2/S3
Prdx5	7.4438e-80	0.36487	0.74	0.5	1.39452e-75	4	PT, S2/S3
mt-Co1	6.89711e-75	0.411434	0.803	0.583	1.2921e-70	4	PT, S2/S3
Hist1h2bc	5.38215e-70	0.257696	0.469	0.242	1.00829e-65	4	PT, S2/S3
Chchd10	2.20148e-69	0.269131	0.635	0.381	4.12425e-65	4	PT, S2/S3
Srxn1	8.31413e-69	0.353112	0.323	0.146	1.55757e-64	4	PT, S2/S3
Herpud1	1.68589e-65	0.260606	0.339	0.156	3.15834e-61	4	PT, S2/S3
mt-Nd4	4.64485e-62	0.40727	0.89	0.732	8.70167e-58	4	PT, S2/S3
Gm42418	6.65739e-52	0.635688	0.931	0.857	1.2472e-47	4	PT, S2/S3
Txnrd1	2.22674e-39	0.296781	0.47	0.313	4.17157e-35	4	PT, S2/S3
Malat1	1.16079e-31	0.453202	0.987	0.999	2.17463e-27	4	PT, S2/S3
Plat	0	2.39543	0.953	0.133	0	5	Endo-1
Ehd3	0	1.87492	0.882	0.043	0	5	Endo-1
Igfbp5	0	1.69769	0.839	0.129	0	5	Endo-1
Emcn	0	1.64495	0.919	0.084	0	5	Endo-1
Kdr	0	1.498	0.873	0.059	0	5	Endo-1
Plpp1	0	1.47545	0.859	0.08	0	5	Endo-1
Plpp3	0	1.42611	0.875	0.161	0	5	Endo-1
Nrp1	0	1.36362	0.858	0.148	0	5	Endo-1
Ly6c1	0	1.26577	0.86	0.204	0	5	Endo-1
Timp3	0	1.1677	0.917	0.522	0	5	Endo-1
Gimap4	0	1.16693	0.718	0.043	0	5	Endo-1
Ctla2a	0	1.16155	0.698	0.061	0	5	Endo-1
Socs3	0	1.13579	0.783	0.24	0	5	Endo-1
Egfl7	0	1.11348	0.761	0.08	0	5	Endo-1
Sgk1	0	1.08625	0.722	0.154	0	5	Endo-1
Slfn5	0	1.08543	0.748	0.104	0	5	Endo-1
Lpl	0	1.04723	0.675	0.223	0	5	Endo-1
Ptprb	0	0.999032	0.722	0.081	0	5	Endo-1
Dkk2	0	0.954774	0.617	0.053	0	5	Endo-1
Adgrf5	0	0.943081	0.751	0.131	0	5	Endo-1
Eng	0	0.926899	0.661	0.075	0	5	Endo-1
Cyp4b1	0	0.912805	0.746	0.182	0	5	Endo-1
Cavin2	0	0.909878	0.572	0.115	0	5	Endo-1
Slc9a3r2	0	0.882674	0.621	0.077	0	5	Endo-1
Meis2	0	0.874209	0.629	0.07	0	5	Endo-1
Pi16	0	0.869535	0.528	0.026	0	5	Endo-1
Flt1	0	0.864629	0.69	0.091	0	5	Endo-1
Pecam1	0	0.858303	0.685	0.082	0	5	Endo-1
Klf2	0	0.843749	0.622	0.182	0	5	Endo-1
B2m	0	0.839253	0.939	0.506	0	5	Endo-1
Ifitm3	0	0.834889	0.821	0.275	0	5	Endo-1
Gimap6	0	0.832231	0.602	0.059	0	5	Endo-1
Iigp1	0	0.820843	0.4	0.059	0	5	Endo-1
Sparc	0	0.765882	0.8	0.187	0	5	Endo-1
Tm4sf1	0	0.744415	0.629	0.136	0	5	Endo-1
Cd200	0	0.739188	0.573	0.096	0	5	Endo-1
Dlc1	0	0.723961	0.542	0.043	0	5	Endo-1
Cd300lg	0	0.722495	0.522	0.023	0	5	Endo-1
Apold1	0	0.709233	0.489	0.069	0	5	Endo-1
Clic4	0	0.701188	0.66	0.218	0	5	Endo-1
Clic5	0	0.68606	0.56	0.073	0	5	Endo-1
Gng11	0	0.681762	0.536	0.084	0	5	Endo-1
Srgn	0	0.681451	0.73	0.218	0	5	Endo-1
Gimap5	0	0.62727	0.439	0.033	0	5	Endo-1
Esam	0	0.627051	0.5	0.067	0	5	Endo-1
F8	0	0.620545	0.4	0.023	0	5	Endo-1
Pbx1	0	0.606089	0.513	0.114	0	5	Endo-1
Thbd	0	0.601643	0.415	0.064	0	5	Endo-1
Syne1	0	0.601628	0.451	0.074	0	5	Endo-1
Fabp4	0	0.6002	0.52	0.091	0	5	Endo-1
Lifr	0	0.584387	0.431	0.053	0	5	Endo-1
Cdh5	0	0.580781	0.489	0.054	0	5	Endo-1
Podxl	0	0.58074	0.519	0.086	0	5	Endo-1
Nostrin	0	0.578659	0.411	0.029	0	5	Endo-1
Slco2a1	0	0.577558	0.414	0.053	0	5	Endo-1
Tbx3	0	0.567565	0.424	0.029	0	5	Endo-1
Gpihbp1	0	0.546548	0.364	0.029	0	5	Endo-1
Ramp2	0	0.541727	0.409	0.05	0	5	Endo-1
Ece1	0	0.53873	0.481	0.095	0	5	Endo-1
Hecw2	0	0.532504	0.362	0.014	0	5	Endo-1
Rasgrp3	0	0.532287	0.409	0.023	0	5	Endo-1
Fam117b	0	0.527212	0.421	0.069	0	5	Endo-1
Ldb2	0	0.518215	0.396	0.034	0	5	Endo-1
Epas1	0	0.505189	0.451	0.083	0	5	Endo-1
AU021092	0	0.504259	0.37	0.03	0	5	Endo-1
Tspan7	0	0.503227	0.336	0.03	0	5	Endo-1
Efnb2	0	0.492449	0.367	0.042	0	5	Endo-1
Adgrl4	0	0.480137	0.408	0.068	0	5	Endo-1
Mmrn2	0	0.477464	0.399	0.042	0	5	Endo-1
Tek	0	0.470213	0.374	0.039	0	5	Endo-1
S1pr1	0	0.469986	0.393	0.052	0	5	Endo-1
Cd38	0	0.468953	0.359	0.036	0	5	Endo-1
Erg	0	0.467082	0.366	0.038	0	5	Endo-1
Cmtm8	0	0.465414	0.341	0.037	0	5	Endo-1
Cyyr1	0	0.45046	0.362	0.021	0	5	Endo-1
Clec1a	0	0.443799	0.316	0.02	0	5	Endo-1
Fgf1	0	0.44198	0.379	0.068	0	5	Endo-1
Tmem204	0	0.436308	0.314	0.021	0	5	Endo-1
Palmd	0	0.432208	0.328	0.024	0	5	Endo-1
Exoc3l2	0	0.429713	0.328	0.022	0	5	Endo-1
Icam2	0	0.419251	0.328	0.032	0	5	Endo-1
Slc43a3	0	0.413027	0.346	0.039	0	5	Endo-1
Fas	0	0.409465	0.34	0.049	0	5	Endo-1
Rasip1	0	0.402551	0.324	0.046	0	5	Endo-1
Fam167b	0	0.398694	0.299	0.023	0	5	Endo-1
Heg1	0	0.379743	0.311	0.043	0	5	Endo-1
Myct1	0	0.371533	0.276	0.023	0	5	Endo-1
Grrp1	0	0.357823	0.278	0.033	0	5	Endo-1
Ushbp1	0	0.332717	0.284	0.033	0	5	Endo-1
Gimap8	0	0.31607	0.256	0.028	0	5	Endo-1
F2r	6.20686e-306	0.34982	0.301	0.042	1.16279e-301	5	Endo-1
Kitl	1.72018e-298	0.563358	0.467	0.108	3.22258e-294	5	Endo-1
Prex2	1.47777e-296	0.344506	0.268	0.034	2.76846e-292	5	Endo-1
Cd34	9.42447e-296	0.359667	0.31	0.046	1.76558e-291	5	Endo-1
Calcrl	1.66717e-293	0.350361	0.273	0.036	3.12328e-289	5	Endo-1
Tmem88	2.03711e-293	0.33906	0.262	0.032	3.81633e-289	5	Endo-1
Tie1	3.53539e-289	0.331927	0.291	0.041	6.62319e-285	5	Endo-1
Ednrb	5.69843e-276	0.513395	0.321	0.053	1.06754e-271	5	Endo-1
Ets1	1.35603e-275	0.461636	0.406	0.086	2.54038e-271	5	Endo-1
Ntn4	1.12093e-274	0.59883	0.458	0.116	2.09994e-270	5	Endo-1
Tmem2	3.53523e-271	0.328386	0.283	0.042	6.62291e-267	5	Endo-1
Gm8995	9.12566e-268	0.54304	0.44	0.103	1.7096e-263	5	Endo-1
Serinc3	1.16025e-266	0.786966	0.843	0.482	2.17362e-262	5	Endo-1
Sptbn1	1.47106e-260	0.822462	0.819	0.483	2.75588e-256	5	Endo-1
Ccnd1	1.03599e-258	0.681178	0.59	0.202	1.94082e-254	5	Endo-1
Ptprg	5.95975e-254	0.362125	0.328	0.061	1.1165e-249	5	Endo-1
Fli1	3.3725e-253	0.307653	0.269	0.04	6.31805e-249	5	Endo-1
Irf1	1.07166e-251	0.639313	0.503	0.149	2.00764e-247	5	Endo-1
Ppp1r2	2.66998e-244	0.495679	0.468	0.131	5.00195e-240	5	Endo-1
Klf7	4.75903e-238	0.506078	0.453	0.124	8.91556e-234	5	Endo-1
Hspb1	5.46666e-235	0.709071	0.607	0.218	1.02412e-230	5	Endo-1
Pitpnc1	1.89474e-234	0.405464	0.347	0.074	3.5496e-230	5	Endo-1
Mndal	7.15256e-229	0.414835	0.413	0.102	1.33996e-224	5	Endo-1
Jun	1.6198e-227	0.866771	0.893	0.63	3.03454e-223	5	Endo-1
Cdkn1a	1.71856e-226	0.847391	0.7	0.328	3.21955e-222	5	Endo-1
Plk2	3.74586e-226	0.525668	0.374	0.089	7.0175e-222	5	Endo-1
Adamts1	1.69242e-223	0.785815	0.65	0.275	3.17059e-219	5	Endo-1
Sh3bp5	3.3878e-220	0.384659	0.339	0.074	6.3467e-216	5	Endo-1
Dusp3	5.93589e-214	0.491145	0.472	0.146	1.11203e-209	5	Endo-1
Ecscr	3.35489e-212	0.310379	0.261	0.045	6.28505e-208	5	Endo-1
Gnas	1.82692e-206	0.670684	0.841	0.562	3.42256e-202	5	Endo-1
Gngt2	1.50158e-201	0.372376	0.317	0.069	2.81307e-197	5	Endo-1
Tshz2	2.89793e-199	0.341045	0.273	0.052	5.42899e-195	5	Endo-1
Sertad1	2.36804e-197	0.408142	0.383	0.102	4.43628e-193	5	Endo-1
Cd24a	5.1048e-197	0.60155	0.821	0.457	9.56332e-193	5	Endo-1
Tcf4	5.83562e-196	0.453205	0.459	0.143	1.09325e-191	5	Endo-1
Fkbp1a	6.75859e-193	0.535002	0.517	0.191	1.26615e-188	5	Endo-1
App	3.42558e-192	0.592026	0.886	0.688	6.41749e-188	5	Endo-1
Rbms1	1.88434e-190	0.526973	0.551	0.217	3.53013e-186	5	Endo-1
Limch1	2.33449e-190	0.427565	0.387	0.107	4.37343e-186	5	Endo-1
Ifi203	5.48002e-189	0.319669	0.296	0.064	1.02663e-184	5	Endo-1
Mgll	1.40496e-186	0.36762	0.321	0.076	2.63206e-182	5	Endo-1
Egr1	1.48893e-184	0.842594	0.772	0.494	2.78936e-180	5	Endo-1
Rdx	1.70409e-176	0.681318	0.654	0.344	3.19244e-172	5	Endo-1
Cd81	2.58488e-165	0.59815	0.673	0.354	4.84252e-161	5	Endo-1
Arap2	1.32567e-163	0.311364	0.284	0.067	2.48352e-159	5	Endo-1
Gnai2	2.17937e-163	0.51805	0.663	0.328	4.08284e-159	5	Endo-1
Ppp1r15a	2.28972e-162	0.619699	0.581	0.267	4.28957e-158	5	Endo-1
Csf1	5.75417e-160	0.295874	0.263	0.059	1.07799e-155	5	Endo-1
Marcksl1	9.60742e-159	0.362901	0.326	0.089	1.79985e-154	5	Endo-1
Ly6e	3.03604e-155	0.506251	0.857	0.53	5.68772e-151	5	Endo-1
Pip4k2a	6.42318e-155	0.332363	0.294	0.075	1.20332e-150	5	Endo-1
Id1	1.3181e-152	0.327449	0.272	0.064	2.46933e-148	5	Endo-1
Akap12	3.68174e-152	0.464108	0.406	0.132	6.89737e-148	5	Endo-1
Ddah2	2.57394e-151	0.352319	0.325	0.092	4.82202e-147	5	Endo-1
Bnip2	2.57669e-150	0.433563	0.417	0.147	4.82718e-146	5	Endo-1
Mxd4	3.62167e-150	0.47919	0.491	0.2	6.78483e-146	5	Endo-1
Mef2a	6.5637e-150	0.415262	0.456	0.171	1.22964e-145	5	Endo-1
Ddx5	1.17248e-144	0.51798	0.858	0.681	2.19653e-140	5	Endo-1
Arhgap29	8.23925e-140	0.404718	0.388	0.134	1.54354e-135	5	Endo-1
Asap1	1.01531e-139	0.262287	0.273	0.069	1.90207e-135	5	Endo-1
Crip2	3.40323e-139	0.44077	0.408	0.147	6.37562e-135	5	Endo-1
Laptm4a	2.65724e-136	0.53081	0.672	0.393	4.97807e-132	5	Endo-1
Id3	4.00317e-135	0.490871	0.488	0.203	7.49954e-131	5	Endo-1
Plcb1	6.17761e-135	0.310811	0.264	0.068	1.15731e-130	5	Endo-1
Xiap	2.62294e-134	0.397943	0.422	0.159	4.91381e-130	5	Endo-1
Elk3	1.78707e-133	0.285803	0.266	0.069	3.34789e-129	5	Endo-1
Junb	2.91227e-133	0.574141	0.75	0.487	5.45584e-129	5	Endo-1
Tcim	3.16816e-131	0.383038	0.371	0.127	5.93522e-127	5	Endo-1
Pim3	7.71937e-131	0.386292	0.401	0.147	1.44615e-126	5	Endo-1
Qk	9.26544e-129	0.447251	0.476	0.204	1.73579e-124	5	Endo-1
Eif1	1.00676e-128	0.512715	0.782	0.577	1.88606e-124	5	Endo-1
Plekho1	9.18697e-128	0.263713	0.265	0.07	1.72109e-123	5	Endo-1
Dusp1	8.95963e-124	0.480547	0.573	0.277	1.6785e-119	5	Endo-1
H2-D1	1.34973e-120	0.453758	0.748	0.462	2.52858e-116	5	Endo-1
Plaur	3.41861e-120	0.318318	0.296	0.091	6.40442e-116	5	Endo-1
Myo1c	1.05098e-117	0.320041	0.339	0.118	1.96891e-113	5	Endo-1
Plscr2	7.51679e-116	0.510603	0.532	0.274	1.4082e-111	5	Endo-1
Calm1	1.4929e-114	0.409498	0.902	0.735	2.79679e-110	5	Endo-1
Rhob	1.68844e-114	0.504211	0.532	0.268	3.16313e-110	5	Endo-1
Bmpr2	3.23826e-113	0.308934	0.306	0.101	6.06656e-109	5	Endo-1
Msn	4.08534e-100	0.425333	0.605	0.345	7.65348e-96	5	Endo-1
Ier2	3.43884e-97	0.461562	0.515	0.271	6.44232e-93	5	Endo-1
Macf1	1.0689e-94	0.431948	0.528	0.292	2.00247e-90	5	Endo-1
Klf4	2.47165e-94	0.42647	0.422	0.191	4.63038e-90	5	Endo-1
Ppp1r10	9.77281e-91	0.252955	0.252	0.082	1.83084e-86	5	Endo-1
Luzp1	1.10589e-90	0.329319	0.379	0.163	2.07178e-86	5	Endo-1
Ehd4	1.69358e-88	0.326242	0.436	0.201	3.17275e-84	5	Endo-1
Itgb1	1.80731e-81	0.400307	0.659	0.461	3.38582e-77	5	Endo-1
Plscr1	7.03088e-79	0.292058	0.349	0.153	1.31717e-74	5	Endo-1
S100a13	1.17547e-78	0.305829	0.329	0.14	2.20213e-74	5	Endo-1
Ifitm2	3.9649e-77	0.335651	0.552	0.314	7.42785e-73	5	Endo-1
Sept7	2.5391e-76	0.394012	0.569	0.355	4.75675e-72	5	Endo-1
Csnk1a1	2.04779e-73	0.397488	0.605	0.405	3.83632e-69	5	Endo-1
Zfand5	2.88491e-72	0.44449	0.607	0.417	5.4046e-68	5	Endo-1
Fos	1.75788e-71	0.492579	0.786	0.611	3.29321e-67	5	Endo-1
Btg2	1.73943e-70	0.469505	0.7	0.524	3.25865e-66	5	Endo-1
Elf1	1.01641e-69	0.327493	0.374	0.183	1.90414e-65	5	Endo-1
Csrnp1	6.68225e-68	0.299654	0.364	0.176	1.25185e-63	5	Endo-1
Hes1	3.1119e-67	0.328413	0.345	0.162	5.82983e-63	5	Endo-1
Rell1	1.00842e-66	0.275229	0.353	0.167	1.88917e-62	5	Endo-1
Col4a1	1.60727e-66	0.269207	0.429	0.221	3.01106e-62	5	Endo-1
Tpm3	2.44614e-64	0.345706	0.719	0.555	4.58261e-60	5	Endo-1
Zfp36	9.05487e-62	0.359809	0.658	0.466	1.69634e-57	5	Endo-1
Dynll1	1.21386e-61	0.337491	0.515	0.316	2.27405e-57	5	Endo-1
Rap1b	1.79692e-61	0.268795	0.381	0.193	3.36635e-57	5	Endo-1
Dnaja1	1.66507e-60	0.376533	0.569	0.39	3.11935e-56	5	Endo-1
Hspa8	1.19789e-59	0.341505	0.811	0.75	2.24413e-55	5	Endo-1
Clec2d	7.25006e-59	0.272808	0.333	0.162	1.35823e-54	5	Endo-1
Tpm4	1.00392e-58	0.341687	0.513	0.32	1.88074e-54	5	Endo-1
Fosb	3.21668e-57	0.400641	0.621	0.425	6.02613e-53	5	Endo-1
S100a16	5.30838e-56	0.257782	0.299	0.139	9.94472e-52	5	Endo-1
Tagln2	9.34256e-55	0.333457	0.551	0.37	1.75023e-50	5	Endo-1
Sypl	1.23126e-54	0.264941	0.337	0.172	2.30664e-50	5	Endo-1
Fermt2	6.40804e-53	0.308091	0.44	0.261	1.20048e-48	5	Endo-1
Ier3	1.12895e-51	0.482141	0.534	0.369	2.11498e-47	5	Endo-1
Ywhab	2.77823e-51	0.335171	0.528	0.367	5.20474e-47	5	Endo-1
Ptma	5.27407e-50	0.25422	0.819	0.71	9.88045e-46	5	Endo-1
Atf4	2.12763e-49	0.348382	0.484	0.318	3.9859e-45	5	Endo-1
Klf9	2.41297e-49	0.26886	0.36	0.197	4.52046e-45	5	Endo-1
Hnrnpa2b1	3.79148e-49	0.327767	0.747	0.648	7.10296e-45	5	Endo-1
2010111I01Rik	9.8725e-49	0.254155	0.273	0.13	1.84951e-44	5	Endo-1
Drap1	5.04848e-47	0.275645	0.405	0.243	9.45782e-43	5	Endo-1
Hsp90ab1	1.35666e-46	0.251252	0.92	0.885	2.54157e-42	5	Endo-1
Arpc3	7.64163e-46	0.295417	0.455	0.293	1.43158e-41	5	Endo-1
Rps3	5.42746e-45	0.287594	0.767	0.655	1.01678e-40	5	Endo-1
Ier5	2.8077e-44	0.254652	0.347	0.191	5.25994e-40	5	Endo-1
Ubb	4.38723e-43	0.294416	0.846	0.778	8.21903e-39	5	Endo-1
Cd47	1.80801e-42	0.271859	0.462	0.301	3.38713e-38	5	Endo-1
Hspa1a	4.02445e-40	0.530214	0.366	0.223	7.53941e-36	5	Endo-1
Sh3glb1	3.02456e-39	0.280191	0.44	0.291	5.66622e-35	5	Endo-1
Hsp90b1	4.83442e-39	0.278563	0.756	0.672	9.05681e-35	5	Endo-1
Arpc2	9.16661e-39	0.260389	0.646	0.508	1.71727e-34	5	Endo-1
Slk	3.28255e-35	0.265807	0.483	0.343	6.14952e-31	5	Endo-1
Zcchc6	3.28718e-34	0.259372	0.354	0.22	6.15821e-30	5	Endo-1
Selenok	3.83536e-34	0.250443	0.349	0.214	7.18515e-30	5	Endo-1
Arglu1	2.78162e-31	0.26442	0.5	0.366	5.21108e-27	5	Endo-1
Gadd45g	3.50446e-28	0.301752	0.509	0.384	6.56526e-24	5	Endo-1
Clic1	1.15357e-25	0.267508	0.481	0.37	2.16109e-21	5	Endo-1
Hspa1b	6.57646e-25	0.440893	0.337	0.233	1.23203e-20	5	Endo-1
Ccnl1	3.4753e-23	0.278796	0.49	0.393	6.51063e-19	5	Endo-1
Aqp2	0	2.17542	0.762	0.077	0	6	CD-PC
Fxyd4	0	1.74749	0.884	0.061	0	6	CD-PC
Aqp3	0	1.45007	0.693	0.085	0	6	CD-PC
Hsd11b2	0	1.40216	0.791	0.099	0	6	CD-PC
Cldn4	0	1.39194	0.888	0.295	0	6	CD-PC
Sprr2f	0	1.29321	0.395	0.022	0	6	CD-PC
Lcn2	0	1.26996	0.74	0.213	0	6	CD-PC
Krt18	0	1.05955	0.806	0.186	0	6	CD-PC
Ly6e	0	1.02839	0.962	0.524	0	6	CD-PC
Pdzk1ip1	0	0.995072	0.823	0.313	0	6	CD-PC
Tacstd2	0	0.98892	0.785	0.204	0	6	CD-PC
Sh3bgrl3	0	0.983199	0.856	0.379	0	6	CD-PC
Plet1	0	0.915183	0.627	0.118	0	6	CD-PC
Cldn7	0	0.85405	0.773	0.25	0	6	CD-PC
Krt7	0	0.812441	0.683	0.185	0	6	CD-PC
Sprr2g	0	0.77558	0.376	0.037	0	6	CD-PC
Epcam	0	0.70617	0.815	0.317	0	6	CD-PC
Mal2	0	0.672611	0.561	0.081	0	6	CD-PC
Adh1	0	0.654416	0.428	0.07	0	6	CD-PC
Npnt	0	0.606838	0.531	0.118	0	6	CD-PC
Elf3	0	0.506195	0.441	0.084	0	6	CD-PC
Apela	0	0.502056	0.379	0.039	0	6	CD-PC
Ehf	0	0.488047	0.503	0.104	0	6	CD-PC
Gm43305	0	0.471261	0.303	0.034	0	6	CD-PC
Krt19	0	0.453582	0.331	0.034	0	6	CD-PC
Scnn1b	0	0.430928	0.392	0.061	0	6	CD-PC
Tmem45b	0	0.384025	0.335	0.023	0	6	CD-PC
Spink8	2.43474e-307	0.557347	0.388	0.068	4.56124e-303	6	CD-PC
S100a11	3.6967e-294	0.818406	0.905	0.523	6.92539e-290	6	CD-PC
Clu	1.14063e-293	1.42168	0.885	0.574	2.13686e-289	6	CD-PC
Krt8	5.74324e-289	0.780873	0.804	0.339	1.07594e-284	6	CD-PC
Tspan1	6.66348e-280	0.450433	0.434	0.094	1.24834e-275	6	CD-PC
Gdf15	4.50888e-275	0.892049	0.463	0.117	8.44694e-271	6	CD-PC
Tspan8	7.47731e-273	0.538446	0.65	0.211	1.4008e-268	6	CD-PC
Tmsb4x	1.01492e-270	0.675695	0.98	0.591	1.90136e-266	6	CD-PC
Cdh16	3.45948e-270	0.697329	0.825	0.383	6.48098e-266	6	CD-PC
Tmem229a	5.62109e-270	0.33298	0.312	0.05	1.05305e-265	6	CD-PC
Gata3	7.18493e-269	0.317456	0.334	0.057	1.34603e-264	6	CD-PC
Gstm2	1.35699e-261	0.420513	0.318	0.054	2.54219e-257	6	CD-PC
Cystm1	2.43133e-261	0.705699	0.749	0.324	4.55485e-257	6	CD-PC
Scd2	1.34318e-254	0.390275	0.414	0.092	2.51632e-250	6	CD-PC
Myh10	4.26369e-251	0.374824	0.379	0.079	7.9876e-247	6	CD-PC
Lgals3	3.96527e-249	0.72	0.807	0.371	7.42854e-245	6	CD-PC
Cd24a	5.11704e-248	0.764015	0.875	0.455	9.58626e-244	6	CD-PC
Gstt1	8.02399e-247	0.465863	0.438	0.108	1.50321e-242	6	CD-PC
Phactr1	1.89081e-239	0.279663	0.262	0.039	3.54224e-235	6	CD-PC
Sfn	1.63584e-236	0.577771	0.595	0.197	3.06458e-232	6	CD-PC
Cldn3	2.43794e-235	0.428759	0.378	0.083	4.56723e-231	6	CD-PC
Cdh1	3.86455e-234	0.561183	0.629	0.226	7.23985e-230	6	CD-PC
Car2	3.1971e-228	0.731942	0.68	0.263	5.98945e-224	6	CD-PC
Mgst1	3.81655e-227	0.502983	0.541	0.173	7.14992e-223	6	CD-PC
Serinc3	4.29625e-227	0.650579	0.865	0.482	8.0486e-223	6	CD-PC
Nudt4	5.55118e-201	0.643388	0.752	0.352	1.03996e-196	6	CD-PC
Cdo1	7.70447e-200	0.393362	0.398	0.103	1.44336e-195	6	CD-PC
Muc1	7.6669e-198	0.365619	0.352	0.084	1.43632e-193	6	CD-PC
Gata2	1.16741e-197	0.269574	0.274	0.051	2.18702e-193	6	CD-PC
Dsp	4.09011e-190	0.371545	0.395	0.106	7.66241e-186	6	CD-PC
Mal	1.35581e-185	0.524963	0.76	0.354	2.53997e-181	6	CD-PC
Wfdc2	4.20855e-178	0.462421	0.76	0.333	7.88429e-174	6	CD-PC
Arhgap24	6.16029e-178	0.441425	0.422	0.128	1.15407e-173	6	CD-PC
Cdkl1	4.0248e-175	0.380596	0.399	0.114	7.54005e-171	6	CD-PC
Rhcg	3.4663e-174	0.440268	0.353	0.093	6.49377e-170	6	CD-PC
Hoxb9	1.4556e-173	0.294432	0.339	0.086	2.72691e-169	6	CD-PC
Aif1l	2.3856e-172	0.399252	0.463	0.153	4.46918e-168	6	CD-PC
Frk	2.04916e-169	0.262989	0.294	0.067	3.8389e-165	6	CD-PC
Rnf128	2.61462e-166	0.372908	0.422	0.134	4.89823e-162	6	CD-PC
Ctsd	4.69615e-164	0.580216	0.813	0.476	8.79777e-160	6	CD-PC
Cav2	1.59841e-162	0.320302	0.348	0.094	2.99446e-158	6	CD-PC
Pigq	3.56649e-159	0.27557	0.267	0.059	6.68146e-155	6	CD-PC
Blnk	1.52069e-154	0.292821	0.341	0.093	2.84885e-150	6	CD-PC
Fam129a	7.50628e-151	0.298796	0.29	0.071	1.40623e-146	6	CD-PC
Anxa1	1.29557e-148	0.516983	0.437	0.152	2.42711e-144	6	CD-PC
Cd9	6.86545e-148	0.498346	0.698	0.358	1.28617e-143	6	CD-PC
Ptp4a2	1.32803e-144	0.461602	0.603	0.285	2.48793e-140	6	CD-PC
Wasl	3.07208e-142	0.384628	0.468	0.177	5.75523e-138	6	CD-PC
Cd2ap	9.04576e-136	0.497513	0.759	0.448	1.69463e-131	6	CD-PC
Tpm1	9.55822e-136	0.349824	0.636	0.296	1.79064e-131	6	CD-PC
Galnt3	2.08032e-135	0.264846	0.275	0.071	3.89727e-131	6	CD-PC
Gipc2	1.74335e-133	0.332996	0.416	0.148	3.26599e-129	6	CD-PC
Clint1	3.73169e-127	0.401756	0.516	0.225	6.99095e-123	6	CD-PC
Atp1b1	2.4471e-124	0.402807	0.97	0.668	4.58439e-120	6	CD-PC
Aplp2	8.29155e-119	0.468952	0.777	0.477	1.55334e-114	6	CD-PC
S100a1	3.69217e-117	0.444858	0.697	0.382	6.9169e-113	6	CD-PC
Ezr	3.77952e-113	0.444096	0.761	0.462	7.08056e-109	6	CD-PC
Defb1	3.1696e-104	0.345811	0.729	0.387	5.93793e-100	6	CD-PC
Hbegf	4.31784e-104	0.497206	0.689	0.4	8.08905e-100	6	CD-PC
Actg1	1.05836e-101	0.409704	0.712	0.439	1.98274e-97	6	CD-PC
Chka	1.25088e-101	0.44543	0.491	0.231	2.34341e-97	6	CD-PC
Klf6	1.00741e-100	0.389839	0.853	0.593	1.88728e-96	6	CD-PC
Ctnna1	2.10142e-99	0.380871	0.662	0.383	3.9368e-95	6	CD-PC
Neat1	1.16497e-97	0.587942	0.78	0.563	2.18246e-93	6	CD-PC
1700011H14Rik	1.18921e-96	0.348814	0.389	0.16	2.22787e-92	6	CD-PC
Ier3	7.22999e-96	0.450505	0.635	0.363	1.35447e-91	6	CD-PC
Phactr2	3.70892e-95	0.282364	0.388	0.158	6.94829e-91	6	CD-PC
Tuba1c	4.59989e-95	0.35758	0.555	0.287	8.61743e-91	6	CD-PC
Egr1	7.9514e-95	0.383879	0.787	0.494	1.48962e-90	6	CD-PC
Serpinb1a	9.27999e-94	0.359749	0.29	0.1	1.73851e-89	6	CD-PC
Erc1	1.87171e-93	0.286585	0.29	0.1	3.50645e-89	6	CD-PC
Ahnak	1.42232e-90	0.337789	0.596	0.317	2.66458e-86	6	CD-PC
Dstn	9.34634e-89	0.302524	0.537	0.274	1.75094e-84	6	CD-PC
Tfcp2l1	5.33637e-84	0.300419	0.431	0.197	9.99716e-80	6	CD-PC
Ldhd	3.13309e-82	0.447495	0.313	0.124	5.86954e-78	6	CD-PC
Itm2b	7.25594e-80	0.349894	0.901	0.715	1.35933e-75	6	CD-PC
Ivns1abp	2.23021e-79	0.350706	0.617	0.367	4.17807e-75	6	CD-PC
F3	1.30581e-77	0.278588	0.312	0.122	2.4463e-73	6	CD-PC
Wls	1.49072e-74	0.288746	0.498	0.262	2.79271e-70	6	CD-PC
Phlda1	3.92903e-74	0.319081	0.396	0.183	7.36065e-70	6	CD-PC
Spint2	2.54149e-73	0.260069	0.52	0.273	4.76122e-69	6	CD-PC
Gadd45b	7.3988e-73	0.36026	0.449	0.227	1.38609e-68	6	CD-PC
Oat	1.653e-71	0.270199	0.337	0.147	3.09672e-67	6	CD-PC
Btg2	2.81869e-67	0.351639	0.75	0.521	5.28054e-63	6	CD-PC
Rasd1	3.89212e-66	0.263967	0.267	0.104	7.29151e-62	6	CD-PC
Zfp36	3.78683e-64	0.352627	0.692	0.464	7.09424e-60	6	CD-PC
Aldoa	4.81174e-63	0.371533	0.665	0.456	9.01431e-59	6	CD-PC
Aes	1.96947e-62	0.296684	0.503	0.287	3.6896e-58	6	CD-PC
Bcam	3.55599e-62	0.252718	0.404	0.201	6.66179e-58	6	CD-PC
Syne2	2.06215e-60	0.305944	0.664	0.432	3.86323e-56	6	CD-PC
Sox4	6.71519e-60	0.310341	0.464	0.253	1.25802e-55	6	CD-PC
Myl12a	1.43596e-59	0.26649	0.675	0.447	2.69013e-55	6	CD-PC
Ldhb	3.3834e-59	0.324464	0.775	0.518	6.33846e-55	6	CD-PC
Prdx5	5.28735e-56	0.283289	0.73	0.502	9.90532e-52	6	CD-PC
Ubc	1.08039e-52	0.289978	0.887	0.753	2.024e-48	6	CD-PC
Atf3	2.43005e-51	0.31006	0.761	0.549	4.55246e-47	6	CD-PC
Vmp1	2.77595e-50	0.283665	0.589	0.385	5.20047e-46	6	CD-PC
Fos	9.09124e-46	0.3109	0.797	0.611	1.70315e-41	6	CD-PC
Atp6v1f	1.00572e-42	0.277158	0.488	0.31	1.88412e-38	6	CD-PC
Lmna	1.0077e-40	0.25918	0.437	0.266	1.88782e-36	6	CD-PC
H1f0	2.84315e-36	0.269824	0.343	0.198	5.32636e-32	6	CD-PC
Lyz2	0	2.79471	0.978	0.143	0	7	Mono
Apoe	0	1.90636	0.737	0.239	0	7	Mono
Ccl6	0	1.73041	0.77	0.041	0	7	Mono
Thbs1	0	1.62933	0.712	0.094	0	7	Mono
Ctss	0	1.61133	0.929	0.109	0	7	Mono
Cd14	0	1.40647	0.832	0.114	0	7	Mono
Tyrobp	0	1.34859	0.897	0.097	0	7	Mono
Tmsb4x	0	1.31216	0.999	0.595	0	7	Mono
Srgn	0	1.3121	0.886	0.216	0	7	Mono
Vim	0	1.20711	0.796	0.164	0	7	Mono
Il1b	0	1.20629	0.739	0.126	0	7	Mono
Ccl9	0	1.20426	0.667	0.037	0	7	Mono
Fcer1g	0	1.13074	0.799	0.083	0	7	Mono
Clec7a	0	1.09855	0.633	0.052	0	7	Mono
Laptm5	0	1.04816	0.807	0.098	0	7	Mono
Chil3	0	1.04181	0.322	0.002	0	7	Mono
Cebpb	0	1.03887	0.836	0.277	0	7	Mono
Cd52	0	1.01997	0.751	0.08	0	7	Mono
Plek	0	1.00192	0.742	0.088	0	7	Mono
Wfdc17	0	0.976602	0.579	0.06	0	7	Mono
Crip1	0	0.967284	0.705	0.189	0	7	Mono
Ccr2	0	0.953195	0.561	0.035	0	7	Mono
Lilrb4a	0	0.908151	0.707	0.082	0	7	Mono
Fn1	0	0.901906	0.424	0.033	0	7	Mono
Tgfbi	0	0.881237	0.523	0.044	0	7	Mono
Gda	0	0.881062	0.577	0.051	0	7	Mono
Ms4a6c	0	0.871849	0.574	0.04	0	7	Mono
Ptprc	0	0.859547	0.611	0.08	0	7	Mono
S100a4	0	0.836647	0.489	0.033	0	7	Mono
Cd44	0	0.830786	0.545	0.05	0	7	Mono
Lcp1	0	0.827685	0.676	0.092	0	7	Mono
Lilr4b	0	0.822109	0.635	0.081	0	7	Mono
Fxyd5	0	0.806949	0.675	0.142	0	7	Mono
Itgam	0	0.805015	0.576	0.038	0	7	Mono
Alox5ap	0	0.799793	0.548	0.045	0	7	Mono
Coro1a	0	0.769675	0.58	0.056	0	7	Mono
Mpeg1	0	0.748002	0.577	0.066	0	7	Mono
Clec4e	0	0.747862	0.423	0.015	0	7	Mono
Fyb	0	0.721177	0.574	0.074	0	7	Mono
Clec4n	0	0.71054	0.412	0.024	0	7	Mono
Cotl1	0	0.691662	0.567	0.099	0	7	Mono
Cybb	0	0.685003	0.535	0.063	0	7	Mono
Basp1	0	0.60953	0.443	0.077	0	7	Mono
Il1rn	0	0.593156	0.336	0.039	0	7	Mono
Msr1	0	0.586958	0.399	0.018	0	7	Mono
Pla2g7	0	0.58624	0.448	0.053	0	7	Mono
Arhgdib	0	0.581379	0.473	0.065	0	7	Mono
Slfn2	0	0.581063	0.469	0.089	0	7	Mono
Fcgr2b	0	0.575946	0.424	0.055	0	7	Mono
Cytip	0	0.563156	0.444	0.06	0	7	Mono
Emp3	0	0.560131	0.434	0.069	0	7	Mono
Slc15a3	0	0.528475	0.431	0.056	0	7	Mono
Clec4d	0	0.528379	0.348	0.013	0	7	Mono
Lsp1	0	0.524508	0.399	0.037	0	7	Mono
Cd53	0	0.521018	0.44	0.038	0	7	Mono
F13a1	0	0.504283	0.258	0.005	0	7	Mono
Fcgr3	0	0.488018	0.387	0.03	0	7	Mono
Cfp	0	0.476938	0.375	0.031	0	7	Mono
Itgb2	0	0.474547	0.359	0.02	0	7	Mono
Cd68	0	0.452495	0.373	0.044	0	7	Mono
Ccr1	0	0.445604	0.329	0.015	0	7	Mono
Emilin2	0	0.426051	0.294	0.007	0	7	Mono
Pld4	0	0.402807	0.345	0.034	0	7	Mono
Csf1r	0	0.402092	0.356	0.045	0	7	Mono
Trem2	0	0.400741	0.26	0.016	0	7	Mono
Csf2rb	0	0.38631	0.299	0.029	0	7	Mono
Adam8	0	0.384527	0.287	0.018	0	7	Mono
Lrp1	0	0.378613	0.312	0.028	0	7	Mono
C5ar1	0	0.378224	0.304	0.03	0	7	Mono
Ly86	0	0.372161	0.344	0.045	0	7	Mono
Ncf2	0	0.365	0.302	0.024	0	7	Mono
Ms4a6b	0	0.360955	0.267	0.024	0	7	Mono
Slc11a1	0	0.359166	0.319	0.025	0	7	Mono
Apbb1ip	0	0.347459	0.276	0.028	0	7	Mono
Pirb	0	0.343805	0.282	0.022	0	7	Mono
Gpr35	0	0.341994	0.261	0.01	0	7	Mono
Cd300c2	0	0.322766	0.275	0.027	0	7	Mono
Clec4a2	0	0.321617	0.273	0.022	0	7	Mono
AI662270	0	0.288814	0.258	0.023	0	7	Mono
Actb	4.77796e-307	1.01983	0.996	0.893	8.95103e-303	7	Mono
Cxcl2	9.86429e-302	0.954867	0.59	0.147	1.84798e-297	7	Mono
Cyba	4.1073e-300	0.80973	0.744	0.266	7.69462e-296	7	Mono
Samsn1	1.7616e-297	0.305753	0.258	0.026	3.30019e-293	7	Mono
Trf	6.15829e-293	0.549962	0.316	0.042	1.15369e-288	7	Mono
Arpc1b	1.75665e-289	0.818476	0.82	0.343	3.29091e-285	7	Mono
Ctsc	2.44589e-289	0.659181	0.596	0.156	4.58213e-285	7	Mono
Ctsz	1.04666e-288	0.613239	0.546	0.132	1.96081e-284	7	Mono
Mafb	5.41442e-285	0.54245	0.416	0.075	1.01434e-280	7	Mono
Spi1	3.83139e-282	0.313928	0.265	0.029	7.17773e-278	7	Mono
Psap	5.91654e-274	0.862357	0.792	0.352	1.1084e-269	7	Mono
Ifi27l2a	1.85828e-271	0.478182	0.332	0.05	3.4813e-267	7	Mono
Csf2ra	1.92237e-271	0.449089	0.38	0.067	3.60137e-267	7	Mono
Lyn	2.0376e-261	0.348248	0.325	0.049	3.81725e-257	7	Mono
Hcls1	9.87143e-261	0.352601	0.31	0.045	1.84931e-256	7	Mono
Aif1	1.45566e-260	0.408445	0.344	0.054	2.72704e-256	7	Mono
Ifi207	1.07357e-257	0.401904	0.339	0.054	2.01123e-253	7	Mono
Plbd1	1.13311e-255	0.347024	0.293	0.04	2.12277e-251	7	Mono
Cyth4	6.34609e-255	0.322671	0.277	0.036	1.18888e-250	7	Mono
Fam49b	6.49103e-253	0.424593	0.382	0.072	1.21603e-248	7	Mono
Samhd1	1.6527e-250	0.44438	0.347	0.06	3.09617e-246	7	Mono
Tm6sf1	1.2601e-246	0.288728	0.283	0.039	2.36067e-242	7	Mono
Ccr5	4.44004e-243	0.3022	0.251	0.031	8.31797e-239	7	Mono
C1qb	3.40136e-240	0.841493	0.449	0.101	6.37211e-236	7	Mono
Npc2	6.45178e-237	0.676721	0.668	0.242	1.20868e-232	7	Mono
Fth1	1.21258e-233	0.953183	0.986	0.889	2.27164e-229	7	Mono
Plac8	9.76852e-232	0.869219	0.372	0.077	1.83003e-227	7	Mono
Unc93b1	2.0927e-219	0.398419	0.355	0.069	3.92046e-215	7	Mono
Zeb2	4.95728e-212	0.447862	0.443	0.109	9.28696e-208	7	Mono
Sirpa	1.38115e-208	0.316467	0.297	0.051	2.58745e-204	7	Mono
Stk17b	7.36703e-208	0.414476	0.366	0.078	1.38014e-203	7	Mono
Ptgs2	2.05963e-207	0.469344	0.284	0.047	3.85852e-203	7	Mono
Gm2a	7.9271e-203	0.399747	0.379	0.085	1.48506e-198	7	Mono
B2m	1.16609e-199	0.625942	0.933	0.512	2.18455e-195	7	Mono
Ptpn6	4.71892e-198	0.307612	0.27	0.044	8.84043e-194	7	Mono
Ctsb	2.30515e-194	0.944231	0.798	0.47	4.31847e-190	7	Mono
Rps8	3.73179e-184	0.614888	0.929	0.679	6.99114e-180	7	Mono
Celf2	1.32196e-180	0.308796	0.296	0.058	2.47655e-176	7	Mono
Calm1	1.76332e-179	0.731676	0.938	0.735	3.3034e-175	7	Mono
Lgals1	2.81939e-179	0.539364	0.482	0.145	5.28185e-175	7	Mono
Rps9	5.06797e-179	0.718474	0.886	0.64	9.49434e-175	7	Mono
Capg	4.62608e-178	0.433458	0.388	0.1	8.66649e-174	7	Mono
Rps24	2.29183e-177	0.588094	0.915	0.632	4.29352e-173	7	Mono
Pim1	8.21062e-176	0.425629	0.472	0.141	1.53818e-171	7	Mono
Tpd52	2.99309e-175	0.599944	0.614	0.25	5.60725e-171	7	Mono
Ucp2	1.17002e-168	0.460524	0.52	0.175	2.19192e-164	7	Mono
C1qc	2.50681e-168	0.51022	0.35	0.081	4.69626e-164	7	Mono
C1qa	1.08856e-165	0.595366	0.365	0.089	2.03932e-161	7	Mono
Rps27a	8.58541e-163	0.607845	0.814	0.497	1.60839e-158	7	Mono
Nr4a2	5.06114e-160	0.304738	0.257	0.048	9.48153e-156	7	Mono
Fau	3.31995e-159	0.555241	0.778	0.439	6.2196e-155	7	Mono
Pfn1	1.72878e-156	0.661191	0.789	0.463	3.23869e-152	7	Mono
Cd83	1.14408e-155	0.41737	0.377	0.098	2.14333e-151	7	Mono
Marcks	1.78782e-155	0.433613	0.498	0.164	3.34929e-151	7	Mono
Gngt2	2.1787e-155	0.39763	0.314	0.073	4.08158e-151	7	Mono
Tmsb10	2.60981e-154	0.652361	0.669	0.315	4.88922e-150	7	Mono
Ifitm3	1.036e-151	0.672262	0.662	0.292	1.94085e-147	7	Mono
Rel	3.26137e-151	0.369688	0.338	0.085	6.10985e-147	7	Mono
S100a6	1.32146e-147	0.561756	0.649	0.29	2.47562e-143	7	Mono
Gm8995	2.43018e-147	0.380876	0.394	0.11	4.5527e-143	7	Mono
Tgfb1	1.67343e-146	0.30343	0.312	0.075	3.135e-142	7	Mono
Metrnl	6.10564e-145	0.333465	0.302	0.072	1.14383e-140	7	Mono
Efhd2	1.32369e-141	0.353671	0.381	0.111	2.4798e-137	7	Mono
Cd74	1.40356e-141	0.807635	0.612	0.274	2.62943e-137	7	Mono
Mrc1	6.19612e-140	0.413932	0.259	0.055	1.16078e-135	7	Mono
Arpc2	5.36972e-137	0.593089	0.795	0.501	1.00596e-132	7	Mono
Rps29	1.77952e-134	0.509362	0.782	0.477	3.33375e-130	7	Mono
Rps26	3.20693e-133	0.513769	0.807	0.503	6.00787e-129	7	Mono
Arpc5	8.4626e-133	0.545353	0.643	0.326	1.58538e-128	7	Mono
Ptpn1	2.79409e-132	0.37549	0.356	0.105	5.23445e-128	7	Mono
Ftl1	3.54434e-131	0.572683	0.803	0.511	6.63997e-127	7	Mono
Msrb1	3.3713e-128	0.460277	0.391	0.13	6.31579e-124	7	Mono
Grn	1.86777e-127	0.420392	0.438	0.156	3.49907e-123	7	Mono
H2-D1	3.45797e-127	0.547825	0.786	0.464	6.47815e-123	7	Mono
Ifitm2	2.30829e-125	0.66389	0.621	0.313	4.32436e-121	7	Mono
Rpl13	1.58076e-124	0.496571	0.903	0.73	2.96139e-120	7	Mono
Nfil3	5.47506e-124	0.296274	0.275	0.068	1.0257e-119	7	Mono
Rps25	7.24526e-121	0.482189	0.776	0.48	1.35733e-116	7	Mono
Emb	1.89411e-120	0.37146	0.367	0.117	3.54843e-116	7	Mono
Cst3	2.45655e-120	0.413515	0.812	0.515	4.60209e-116	7	Mono
Hexa	6.92987e-119	0.341095	0.294	0.08	1.29824e-114	7	Mono
Rps19	8.23868e-118	0.499563	0.813	0.552	1.54343e-113	7	Mono
Ctsa	4.11088e-117	0.355802	0.41	0.145	7.70133e-113	7	Mono
Rpl32	1.8685e-114	0.512181	0.82	0.581	3.50046e-110	7	Mono
Gnai2	6.72267e-114	0.424444	0.665	0.333	1.25943e-109	7	Mono
Rps14	1.70233e-113	0.484231	0.869	0.636	3.18915e-109	7	Mono
Rpsa	7.37389e-112	0.482519	0.765	0.482	1.38142e-107	7	Mono
Rpl18a	9.10144e-110	0.513198	0.727	0.455	1.70506e-105	7	Mono
Jdp2	9.34521e-109	0.291047	0.264	0.069	1.75073e-104	7	Mono
Ifngr1	6.89043e-107	0.316323	0.342	0.11	1.29085e-102	7	Mono
Cfl1	9.13195e-107	0.508826	0.745	0.482	1.71078e-102	7	Mono
Pabpc1	6.85915e-106	0.468625	0.866	0.654	1.28499e-101	7	Mono
Rps3	1.10185e-103	0.475761	0.858	0.652	2.06421e-99	7	Mono
Creg1	3.11875e-101	0.370286	0.355	0.124	5.84267e-97	7	Mono
Sh3bgrl	5.6683e-100	0.371061	0.499	0.218	1.0619e-95	7	Mono
Rps12	1.48915e-99	0.429787	0.741	0.461	2.78977e-95	7	Mono
Arpc3	1.13612e-98	0.430563	0.576	0.288	2.12841e-94	7	Mono
Rps28	1.29922e-98	0.43781	0.701	0.435	2.43396e-94	7	Mono
H2-Aa	1.80182e-96	0.653435	0.373	0.134	3.37553e-92	7	Mono
Lgals3	2.84579e-96	0.480223	0.69	0.383	5.33131e-92	7	Mono
Actr3	6.00527e-96	0.370841	0.473	0.207	1.12503e-91	7	Mono
Capzb	2.56705e-95	0.397362	0.486	0.217	4.80911e-91	7	Mono
Sem1	1.67121e-94	0.425797	0.633	0.357	3.13085e-90	7	Mono
Rpl17	4.11249e-94	0.424361	0.761	0.509	7.70434e-90	7	Mono
Tgm2	1.11608e-93	0.390627	0.333	0.117	2.09086e-89	7	Mono
Aprt	3.42608e-91	0.344225	0.329	0.117	6.41842e-87	7	Mono
Dusp5	2.35602e-90	0.272987	0.282	0.088	4.41376e-86	7	Mono
Rps15a	4.71865e-90	0.3905	0.701	0.427	8.83992e-86	7	Mono
Rplp1	1.08464e-89	0.413646	0.859	0.675	2.03197e-85	7	Mono
Pitpna	5.12795e-89	0.357319	0.403	0.167	9.6067e-85	7	Mono
Mcl1	5.47035e-88	0.43231	0.655	0.383	1.02482e-83	7	Mono
Gpx1	4.32996e-87	0.387704	0.798	0.55	8.11175e-83	7	Mono
Rps27	7.31316e-86	0.422887	0.779	0.545	1.37005e-81	7	Mono
Rps7	9.31879e-86	0.421719	0.686	0.424	1.74578e-81	7	Mono
Btg1	1.75969e-85	0.339062	0.453	0.205	3.29661e-81	7	Mono
Rps13	6.86664e-85	0.401388	0.649	0.389	1.2864e-80	7	Mono
Cdkn1a	1.13772e-83	0.400068	0.626	0.338	2.13141e-79	7	Mono
Kctd12	1.78404e-83	0.307177	0.347	0.129	3.34222e-79	7	Mono
Plaur	5.16272e-83	0.251954	0.286	0.095	9.67184e-79	7	Mono
Ctsh	6.93716e-83	0.277993	0.336	0.124	1.29961e-78	7	Mono
Rpl26	4.39436e-82	0.420406	0.732	0.513	8.23239e-78	7	Mono
Rap1b	8.8802e-82	0.375604	0.43	0.193	1.66362e-77	7	Mono
Tpm3	3.99447e-81	0.405056	0.782	0.554	7.48324e-77	7	Mono
Arpc4	2.7502e-78	0.283108	0.335	0.13	5.15222e-74	7	Mono
Rpl34	6.83956e-78	0.352176	0.632	0.374	1.28132e-73	7	Mono
Rpl8	1.04167e-77	0.453709	0.729	0.519	1.95146e-73	7	Mono
Tmed5	1.51175e-76	0.31397	0.409	0.181	2.83211e-72	7	Mono
Rplp0	1.15137e-75	0.441569	0.727	0.507	2.15698e-71	7	Mono
Kdm7a	1.65001e-75	0.272388	0.277	0.097	3.09112e-71	7	Mono
Rack1	5.08636e-75	0.395151	0.657	0.415	9.52878e-71	7	Mono
Rpl11	1.20319e-74	0.386968	0.788	0.579	2.25406e-70	7	Mono
Capza2	4.04102e-74	0.328953	0.425	0.198	7.57044e-70	7	Mono
Picalm	1.40781e-73	0.372124	0.532	0.29	2.6374e-69	7	Mono
Rpl4	2.97601e-73	0.395513	0.804	0.619	5.57526e-69	7	Mono
H2-Ab1	2.12592e-72	0.681458	0.413	0.192	3.98269e-68	7	Mono
Atp2b1	4.97048e-72	0.390046	0.541	0.301	9.3117e-68	7	Mono
Rps5	1.67542e-70	0.40073	0.738	0.524	3.13874e-66	7	Mono
Ninj1	4.72736e-70	0.308706	0.29	0.11	8.85624e-66	7	Mono
Rplp2	5.91879e-70	0.37331	0.687	0.469	1.10883e-65	7	Mono
Lgmn	2.2197e-69	0.432314	0.546	0.315	4.15838e-65	7	Mono
Sdcbp	7.87247e-69	0.324686	0.452	0.226	1.47483e-64	7	Mono
Kdm6b	1.09365e-67	0.318292	0.37	0.164	2.04884e-63	7	Mono
Rps20	8.30612e-67	0.369813	0.683	0.459	1.55607e-62	7	Mono
Rpl22	1.10534e-66	0.348647	0.623	0.396	2.07075e-62	7	Mono
Rpl18	6.55709e-66	0.383549	0.659	0.446	1.22841e-61	7	Mono
Atp1b3	7.92781e-66	0.280648	0.382	0.173	1.4852e-61	7	Mono
Pkm	2.88262e-64	0.413039	0.531	0.311	5.40029e-60	7	Mono
Rps4x	3.41089e-64	0.375708	0.643	0.425	6.38997e-60	7	Mono
Litaf	1.04873e-63	0.290972	0.474	0.243	1.96469e-59	7	Mono
Rpl39	4.7885e-63	0.338568	0.613	0.382	8.97077e-59	7	Mono
Rpl10	8.49571e-63	0.336891	0.59	0.356	1.59159e-58	7	Mono
Rps3a1	1.29179e-62	0.316669	0.622	0.389	2.42004e-58	7	Mono
Rpl6	1.54648e-62	0.366087	0.665	0.455	2.89717e-58	7	Mono
Tiparp	8.11873e-62	0.286633	0.324	0.137	1.52096e-57	7	Mono
Ell2	1.01907e-60	0.263652	0.279	0.111	1.90912e-56	7	Mono
Rps11	2.92982e-60	0.335694	0.589	0.367	5.48872e-56	7	Mono
Cdc42	7.35293e-60	0.376557	0.664	0.452	1.3775e-55	7	Mono
Rps10	8.83489e-60	0.336662	0.622	0.405	1.65513e-55	7	Mono
H2-Eb1	1.03014e-59	0.524639	0.35	0.156	1.92987e-55	7	Mono
Sh3bgrl3	3.82493e-59	0.283655	0.644	0.396	7.16562e-55	7	Mono
Rpl37a	1.0681e-58	0.341596	0.681	0.488	2.00097e-54	7	Mono
Rpl23a	7.16943e-57	0.356423	0.681	0.484	1.34312e-52	7	Mono
H3f3b	2.8259e-56	0.342782	0.817	0.643	5.29405e-52	7	Mono
Rpl14	9.02388e-55	0.337536	0.78	0.631	1.69053e-50	7	Mono
Rpl27	3.33652e-54	0.312178	0.605	0.401	6.25063e-50	7	Mono
Tpt1	9.0323e-54	0.323939	0.709	0.509	1.69211e-49	7	Mono
Sub1	3.95683e-53	0.307396	0.458	0.26	7.41273e-49	7	Mono
Clta	3.8661e-51	0.326578	0.478	0.282	7.24275e-47	7	Mono
Rrbp1	1.12458e-50	0.343548	0.663	0.475	2.1068e-46	7	Mono
Mbnl1	2.08548e-50	0.257751	0.342	0.164	3.90694e-46	7	Mono
Rpl37	3.65624e-50	0.308976	0.658	0.465	6.84961e-46	7	Mono
Lrrfip1	2.48734e-49	0.295377	0.408	0.216	4.65977e-45	7	Mono
Rps23	8.6433e-49	0.275731	0.552	0.347	1.61924e-44	7	Mono
Rps18	1.87496e-48	0.308764	0.627	0.433	3.51255e-44	7	Mono
Iqgap1	6.53587e-47	0.342483	0.614	0.431	1.22443e-42	7	Mono
Rgs2	1.24349e-46	0.261114	0.35	0.171	2.32956e-42	7	Mono
Hspa5	1.59868e-45	0.403343	0.81	0.701	2.99496e-41	7	Mono
Atox1	4.76805e-45	0.307664	0.549	0.357	8.93246e-41	7	Mono
Rpl36al	5.49847e-45	0.252621	0.402	0.222	1.03008e-40	7	Mono
Cstb	1.74815e-44	0.367097	0.518	0.34	3.27499e-40	7	Mono
Msn	1.96958e-43	0.293913	0.558	0.351	3.68981e-39	7	Mono
Gsr	2.39194e-42	0.293443	0.275	0.131	4.48107e-38	7	Mono
Rpl23	2.62643e-42	0.267367	0.6	0.426	4.92036e-38	7	Mono
Rpl21	1.82773e-41	0.261381	0.654	0.478	3.42408e-37	7	Mono
Rpl38	2.13898e-41	0.259087	0.629	0.448	4.00717e-37	7	Mono
Rpl41	7.09456e-41	0.261058	0.797	0.673	1.32909e-36	7	Mono
Anxa2	1.89296e-40	0.31303	0.512	0.326	3.54627e-36	7	Mono
Rpl5	1.86477e-39	0.253783	0.598	0.422	3.49346e-35	7	Mono
Rpl19	2.46332e-39	0.252417	0.582	0.403	4.61479e-35	7	Mono
Tln1	8.00272e-39	0.258596	0.427	0.253	1.49923e-34	7	Mono
Ifrd1	1.01965e-37	0.250747	0.559	0.362	1.91022e-33	7	Mono
Rpl9	8.69843e-37	0.28211	0.602	0.44	1.62956e-32	7	Mono
Lamp1	1.16929e-36	0.322315	0.58	0.43	2.19055e-32	7	Mono
BC005537	1.0684e-35	0.268862	0.447	0.282	2.00154e-31	7	Mono
H2-K1	1.41063e-32	0.257806	0.635	0.463	2.64268e-28	7	Mono
Chmp4b	2.53554e-30	0.253871	0.484	0.329	4.75007e-26	7	Mono
Hsp90b1	1.41872e-27	0.290079	0.762	0.673	2.65783e-23	7	Mono
Ahnak	3.38573e-27	0.262162	0.475	0.327	6.34283e-23	7	Mono
Dab2	4.3474e-27	0.305913	0.399	0.262	8.14442e-23	7	Mono
Ctsd	4.81137e-26	0.544115	0.6	0.492	9.01362e-22	7	Mono
Atp6v1g3	0	2.46001	0.976	0.042	0	8	CD-IC
Car2	0	1.45568	0.891	0.258	0	8	CD-IC
Slc26a4	0	1.39575	0.473	0.021	0	8	CD-IC
Atp6v0d2	0	1.1029	0.769	0.029	0	8	CD-IC
Atp6v1a	0	1.08232	0.861	0.283	0	8	CD-IC
Pam	0	1.07348	0.786	0.111	0	8	CD-IC
Atp6v1b1	0	1.03851	0.775	0.083	0	8	CD-IC
Spink8	0	0.984314	0.542	0.064	0	8	CD-IC
Serpinb9	0	0.981121	0.644	0.065	0	8	CD-IC
Atp6v1c2	0	0.893959	0.613	0.01	0	8	CD-IC
Tmem213	0	0.888981	0.809	0.23	0	8	CD-IC
Hexb	0	0.873464	0.686	0.098	0	8	CD-IC
Atp6v1e1	0	0.853116	0.791	0.273	0	8	CD-IC
Atp6v0a4	0	0.832139	0.753	0.183	0	8	CD-IC
Aqp6	0	0.81048	0.367	0.011	0	8	CD-IC
Serpinb6b	0	0.744253	0.556	0.042	0	8	CD-IC
Car12	0	0.726129	0.529	0.06	0	8	CD-IC
Clcnkb	0	0.713404	0.756	0.192	0	8	CD-IC
Tfcp2l1	0	0.693965	0.682	0.187	0	8	CD-IC
Eps8	0	0.690817	0.557	0.109	0	8	CD-IC
Pgrmc1	0	0.678128	0.632	0.166	0	8	CD-IC
Plet1	0	0.66575	0.582	0.127	0	8	CD-IC
Aldh1l1	0	0.661668	0.547	0.102	0	8	CD-IC
Ckmt1	0	0.631114	0.549	0.085	0	8	CD-IC
Ociad2	0	0.623092	0.496	0.027	0	8	CD-IC
Hepacam2	0	0.593721	0.458	0.008	0	8	CD-IC
Slc4a9	0	0.577688	0.444	0.012	0	8	CD-IC
Itpr2	0	0.532441	0.532	0.103	0	8	CD-IC
Guca2a	0	0.523339	0.323	0.009	0	8	CD-IC
Foxi1	0	0.506626	0.343	0.006	0	8	CD-IC
Rhbg	0	0.474657	0.371	0.037	0	8	CD-IC
Rcan2	0	0.426263	0.389	0.02	0	8	CD-IC
Rnf152	0	0.333751	0.303	0.028	0	8	CD-IC
Alcam	9.90808e-292	0.449024	0.418	0.072	1.85618e-287	8	CD-IC
Atp6v1d	3.74863e-282	0.63044	0.611	0.168	7.02268e-278	8	CD-IC
Rhcg	2.38662e-279	0.514463	0.461	0.09	4.47108e-275	8	CD-IC
Adgrf5	2.79118e-248	0.626668	0.578	0.151	5.229e-244	8	CD-IC
Pde1a	3.58293e-248	0.362597	0.337	0.054	6.71227e-244	8	CD-IC
Atp6ap2	1.69011e-247	0.566355	0.588	0.17	3.16626e-243	8	CD-IC
Atp6v0b	1.61536e-238	0.702909	0.769	0.326	3.02621e-234	8	CD-IC
Anxa4	3.80789e-228	0.404175	0.448	0.102	7.1337e-224	8	CD-IC
S100a1	6.99125e-227	0.831002	0.807	0.38	1.30974e-222	8	CD-IC
Aqp3	7.78562e-218	0.331316	0.466	0.106	1.45856e-213	8	CD-IC
Scand1	5.30666e-211	0.546848	0.552	0.17	9.94149e-207	8	CD-IC
Cldn4	1.3411e-202	0.867341	0.743	0.311	2.51242e-198	8	CD-IC
Mme	1.10665e-200	0.492902	0.361	0.077	2.07321e-196	8	CD-IC
Emb	6.06243e-192	0.467758	0.44	0.114	1.13574e-187	8	CD-IC
Clcn5	1.83954e-190	0.344732	0.326	0.065	3.44619e-186	8	CD-IC
Pcolce	2.47317e-179	0.490463	0.41	0.106	4.63323e-175	8	CD-IC
Rpap3	2.22635e-177	0.290889	0.297	0.057	4.17084e-173	8	CD-IC
Epcam	1.71907e-174	0.505218	0.769	0.326	3.2205e-170	8	CD-IC
Dmxl1	2.83542e-170	0.359353	0.371	0.091	5.31187e-166	8	CD-IC
Gadd45a	7.83137e-170	0.594862	0.637	0.255	1.46713e-165	8	CD-IC
Atp6ap1	2.73755e-169	0.4085	0.491	0.152	5.12853e-165	8	CD-IC
Serpinb1a	1.49696e-168	0.386455	0.389	0.098	2.80441e-164	8	CD-IC
Atp6v0e	5.21551e-167	0.571687	0.639	0.261	9.77074e-163	8	CD-IC
Cxadr	8.14694e-163	0.407247	0.447	0.132	1.52625e-158	8	CD-IC
Chchd10	1.79156e-160	0.64942	0.767	0.378	3.3563e-156	8	CD-IC
Atp6v1f	5.63172e-150	0.51684	0.675	0.302	1.05505e-145	8	CD-IC
Efhd1	1.04127e-149	0.335632	0.343	0.086	1.95071e-145	8	CD-IC
Cldn7	3.95339e-149	0.478094	0.648	0.264	7.40628e-145	8	CD-IC
St14	8.98337e-145	0.314653	0.415	0.121	1.68294e-140	8	CD-IC
Slc43a2	4.33183e-144	0.313005	0.341	0.087	8.11525e-140	8	CD-IC
Ldhb	2.70506e-138	0.584957	0.881	0.516	5.06766e-134	8	CD-IC
Ap1ar	6.10877e-138	0.307616	0.299	0.072	1.14442e-133	8	CD-IC
Mdh1	1.54208e-128	0.570836	0.722	0.379	2.88894e-124	8	CD-IC
Arhgap18	2.29979e-125	0.297011	0.313	0.083	4.30843e-121	8	CD-IC
Pdzk1ip1	1.42632e-124	0.50436	0.674	0.328	2.67206e-120	8	CD-IC
Cystm1	2.9148e-120	0.460943	0.678	0.333	5.46059e-116	8	CD-IC
Foxp1	7.44774e-120	0.270181	0.325	0.09	1.39526e-115	8	CD-IC
Atp6v1h	3.64029e-118	0.339904	0.393	0.129	6.81972e-114	8	CD-IC
Uqcrb	3.67076e-114	0.494855	0.693	0.381	6.8768e-110	8	CD-IC
Krt18	1.29838e-113	0.441333	0.525	0.209	2.43239e-109	8	CD-IC
Ncoa7	1.26591e-110	0.335212	0.446	0.165	2.37155e-106	8	CD-IC
Itm2b	9.61267e-106	0.527772	0.911	0.717	1.80084e-101	8	CD-IC
Atp5b	4.1079e-105	0.488547	0.842	0.569	7.69575e-101	8	CD-IC
Mif	1.28756e-104	0.446342	0.57	0.267	2.41211e-100	8	CD-IC
Slc25a4	2.56604e-102	0.557863	0.673	0.374	4.80723e-98	8	CD-IC
S100a11	3.31625e-99	0.457652	0.833	0.533	6.21267e-95	8	CD-IC
Cox6c	1.2441e-96	0.463977	0.895	0.65	2.33069e-92	8	CD-IC
Defb1	1.84944e-94	0.509685	0.709	0.393	3.46474e-90	8	CD-IC
Slc25a5	1.51206e-89	0.482071	0.8	0.548	2.8327e-85	8	CD-IC
Phlda1	5.90431e-87	0.363033	0.441	0.183	1.10611e-82	8	CD-IC
Aldoa	2.87036e-85	0.442196	0.723	0.456	5.37734e-81	8	CD-IC
Cox7a2	1.22118e-84	0.416196	0.743	0.465	2.28776e-80	8	CD-IC
Bsg	2.6624e-82	0.390873	0.589	0.314	4.98774e-78	8	CD-IC
Krt7	3.88355e-81	0.299964	0.47	0.203	7.27544e-77	8	CD-IC
Sdhd	1.01202e-80	0.258138	0.372	0.144	1.89592e-76	8	CD-IC
Cox7b	2.66923e-79	0.39774	0.704	0.432	5.00054e-75	8	CD-IC
Atp1b1	4.43859e-78	0.283052	0.969	0.672	8.31525e-74	8	CD-IC
Aif1l	1.84132e-77	0.278142	0.394	0.161	3.44953e-73	8	CD-IC
Cebpd	7.76845e-76	0.325506	0.412	0.175	1.45534e-71	8	CD-IC
Uqcr10	7.02131e-75	0.34742	0.698	0.419	1.31537e-70	8	CD-IC
Cox5a	1.59201e-73	0.40357	0.671	0.409	2.98248e-69	8	CD-IC
Atp5a1	1.40545e-72	0.367765	0.753	0.491	2.63298e-68	8	CD-IC
Cycs	3.44978e-71	0.327058	0.44	0.206	6.46281e-67	8	CD-IC
Cox8a	2.34805e-69	0.35262	0.691	0.429	4.39883e-65	8	CD-IC
Uqcrfs1	2.27371e-68	0.370187	0.523	0.277	4.25957e-64	8	CD-IC
Atp5j	2.51731e-68	0.366214	0.681	0.409	4.71592e-64	8	CD-IC
Atp5h	1.31513e-67	0.380551	0.661	0.41	2.46377e-63	8	CD-IC
Ndufa4	4.89372e-67	0.393715	0.757	0.514	9.1679e-63	8	CD-IC
Ptbp3	6.17651e-67	0.330304	0.548	0.298	1.15711e-62	8	CD-IC
Atp5g3	1.76054e-66	0.359073	0.745	0.5	3.2982e-62	8	CD-IC
Neat1	4.1032e-65	0.406616	0.801	0.565	7.68693e-61	8	CD-IC
Csrp1	4.6695e-65	0.257482	0.36	0.152	8.74784e-61	8	CD-IC
Trib1	1.02124e-64	0.321804	0.444	0.217	1.9132e-60	8	CD-IC
Etfa	1.20615e-64	0.323929	0.459	0.227	2.2596e-60	8	CD-IC
Atp5g1	8.50607e-64	0.3483	0.569	0.32	1.59353e-59	8	CD-IC
Cd2ap	2.92798e-63	0.333482	0.711	0.455	5.48529e-59	8	CD-IC
Ndufc1	2.11447e-61	0.314133	0.604	0.358	3.96125e-57	8	CD-IC
Usmg5	6.40054e-61	0.288864	0.587	0.336	1.19908e-56	8	CD-IC
Cox6b1	1.66853e-60	0.342553	0.75	0.508	3.12582e-56	8	CD-IC
Atp5c1	3.45184e-60	0.340241	0.647	0.398	6.46668e-56	8	CD-IC
Atp5f1	1.39651e-58	0.345727	0.621	0.384	2.61623e-54	8	CD-IC
Slc25a3	7.17769e-57	0.339673	0.706	0.481	1.34467e-52	8	CD-IC
Camk2n1	7.52452e-57	0.263821	0.484	0.255	1.40964e-52	8	CD-IC
Uqcr11	8.09759e-57	0.322985	0.618	0.383	1.517e-52	8	CD-IC
Cox7c	2.18278e-56	0.327463	0.767	0.544	4.08922e-52	8	CD-IC
Ubc	7.70211e-56	0.373047	0.882	0.756	1.44291e-51	8	CD-IC
Atf3	8.50913e-56	0.422627	0.741	0.553	1.5941e-51	8	CD-IC
Sox4	1.80334e-54	0.312721	0.478	0.255	3.37839e-50	8	CD-IC
Aplp2	4.36878e-54	0.265935	0.734	0.483	8.18447e-50	8	CD-IC
2010107E04Rik	9.67665e-54	0.3004	0.628	0.395	1.81282e-49	8	CD-IC
Tuba1c	9.49264e-53	0.303501	0.516	0.293	1.77835e-48	8	CD-IC
Cdh16	1.1701e-52	0.257874	0.655	0.399	2.19207e-48	8	CD-IC
Aco2	2.3088e-51	0.289719	0.435	0.232	4.3253e-47	8	CD-IC
Ndufab1	2.45585e-51	0.262672	0.429	0.224	4.60079e-47	8	CD-IC
Atp5o	3.35818e-50	0.266477	0.587	0.353	6.29121e-46	8	CD-IC
Chchd2	6.55161e-46	0.28481	0.803	0.623	1.22738e-41	8	CD-IC
Ndufa5	3.58101e-45	0.251018	0.519	0.306	6.70867e-41	8	CD-IC
Ndufa1	4.4043e-45	0.250671	0.494	0.29	8.25101e-41	8	CD-IC
Immt	3.64565e-44	0.259048	0.426	0.236	6.82975e-40	8	CD-IC
Ctsl	4.2311e-43	0.255375	0.711	0.486	7.92654e-39	8	CD-IC
Cyc1	2.67856e-42	0.263928	0.419	0.234	5.01802e-38	8	CD-IC
Cox4i1	1.13509e-41	0.268554	0.873	0.706	2.12647e-37	8	CD-IC
Cst3	1.72913e-41	0.269891	0.704	0.521	3.23936e-37	8	CD-IC
App	2.77741e-39	0.250547	0.847	0.694	5.20319e-35	8	CD-IC
Atp5e	1.35689e-38	0.269604	0.657	0.458	2.54201e-34	8	CD-IC
Cox6a1	1.66537e-38	0.267854	0.824	0.652	3.1199e-34	8	CD-IC
Actg1	1.82303e-36	0.259553	0.63	0.447	3.41526e-32	8	CD-IC
Atp5d	4.14286e-35	0.262528	0.583	0.398	7.76124e-31	8	CD-IC
Klf6	2.60694e-32	0.305486	0.739	0.603	4.88384e-28	8	CD-IC
Fxyd2	8.63279e-19	0.265215	0.71	0.57	1.61727e-14	8	CD-IC
Fabp4	0	1.92549	0.868	0.083	0	9	Endo-2
Plvap	0	1.72092	0.824	0.032	0	9	Endo-2
Ly6c1	0	1.29296	0.857	0.218	0	9	Endo-2
Flt1	0	1.22708	0.781	0.099	0	9	Endo-2
Rgcc	0	1.20647	0.619	0.025	0	9	Endo-2
Igfbp3	0	1.195	0.472	0.03	0	9	Endo-2
Sparc	0	1.18853	0.871	0.196	0	9	Endo-2
B2m	0	1.1002	0.967	0.513	0	9	Endo-2
Ifitm3	0	1.02323	0.856	0.285	0	9	Endo-2
Pecam1	0	0.970907	0.725	0.093	0	9	Endo-2
Tm4sf1	0	0.948894	0.693	0.143	0	9	Endo-2
Adgrl4	0	0.90389	0.598	0.065	0	9	Endo-2
Emcn	0	0.892416	0.716	0.112	0	9	Endo-2
Rsad2	0	0.889211	0.486	0.049	0	9	Endo-2
Egfl7	0	0.888462	0.69	0.098	0	9	Endo-2
Plpp1	0	0.880571	0.664	0.106	0	9	Endo-2
Plpp3	0	0.840595	0.693	0.185	0	9	Endo-2
Gng11	0	0.8139	0.57	0.092	0	9	Endo-2
Esm1	0	0.799993	0.318	0.019	0	9	Endo-2
Gpihbp1	0	0.767085	0.371	0.036	0	9	Endo-2
Cd200	0	0.721427	0.551	0.107	0	9	Endo-2
Eng	0	0.715881	0.541	0.093	0	9	Endo-2
Cd93	0	0.658933	0.478	0.067	0	9	Endo-2
Ptprb	0	0.642684	0.548	0.103	0	9	Endo-2
Ednrb	0	0.640973	0.402	0.055	0	9	Endo-2
Gimap6	0	0.637116	0.494	0.075	0	9	Endo-2
Kdr	0	0.63079	0.562	0.091	0	9	Endo-2
Cavin3	0	0.591396	0.401	0.06	0	9	Endo-2
Gimap4	0	0.559706	0.449	0.071	0	9	Endo-2
Rflnb	0	0.553231	0.365	0.049	0	9	Endo-2
Cdh5	0	0.539065	0.444	0.065	0	9	Endo-2
Cd34	0	0.527708	0.399	0.047	0	9	Endo-2
S1pr1	0	0.502827	0.4	0.059	0	9	Endo-2
Inhbb	0	0.491431	0.283	0.01	0	9	Endo-2
Ecscr	0	0.48108	0.359	0.044	0	9	Endo-2
Ifi44	0	0.474981	0.323	0.03	0	9	Endo-2
Tie1	0	0.465564	0.345	0.043	0	9	Endo-2
Fam167b	0	0.415956	0.308	0.029	0	9	Endo-2
Gja1	0	0.388098	0.262	0.023	0	9	Endo-2
Tek	1.88495e-307	0.460511	0.359	0.047	3.53127e-303	9	Endo-2
Rasip1	5.26927e-307	0.47389	0.367	0.049	9.87145e-303	9	Endo-2
Ctla2a	4.55325e-293	0.625797	0.472	0.086	8.53006e-289	9	Endo-2
Adgrf5	1.11871e-291	0.680743	0.623	0.15	2.09579e-287	9	Endo-2
Thbd	7.41833e-289	0.561945	0.425	0.071	1.38975e-284	9	Endo-2
Col4a1	5.53532e-288	0.876269	0.684	0.212	1.03699e-283	9	Endo-2
Tcf4	3.4109e-265	0.665608	0.565	0.145	6.38998e-261	9	Endo-2
Ehd4	2.19382e-264	0.793099	0.645	0.196	4.1099e-260	9	Endo-2
Esam	1.6078e-256	0.564753	0.426	0.08	3.01206e-252	9	Endo-2
Ushbp1	1.45599e-238	0.370172	0.286	0.038	2.72765e-234	9	Endo-2
Nrp2	1.9629e-229	0.361881	0.268	0.035	3.6773e-225	9	Endo-2
Mmrn2	7.83606e-229	0.401526	0.332	0.053	1.46801e-224	9	Endo-2
Meis2	7.23672e-224	0.467066	0.436	0.092	1.35573e-219	9	Endo-2
Tmem88	6.22301e-221	0.375634	0.27	0.037	1.16582e-216	9	Endo-2
Slc43a3	4.29677e-219	0.384246	0.305	0.047	8.04956e-215	9	Endo-2
Gimap5	2.60656e-218	0.365514	0.307	0.048	4.88313e-214	9	Endo-2
Lmo2	4.05794e-217	0.502419	0.318	0.053	7.60214e-213	9	Endo-2
H2-D1	6.00764e-213	0.824549	0.858	0.462	1.12547e-208	9	Endo-2
Grrp1	1.13613e-212	0.328786	0.271	0.038	2.12843e-208	9	Endo-2
Entpd1	9.32263e-212	0.39493	0.296	0.046	1.7465e-207	9	Endo-2
Slc9a3r2	2.05392e-204	0.54577	0.43	0.098	3.84782e-200	9	Endo-2
Col4a2	2.99831e-203	0.567855	0.463	0.119	5.61703e-199	9	Endo-2
Cd300lg	8.8626e-200	0.389949	0.288	0.045	1.66032e-195	9	Endo-2
Ldb2	6.0318e-196	0.384725	0.29	0.047	1.13e-191	9	Endo-2
Ramp2	9.0578e-189	0.421508	0.325	0.061	1.69689e-184	9	Endo-2
Erg	3.1469e-188	0.345922	0.289	0.048	5.89541e-184	9	Endo-2
Slfn5	2.50555e-187	0.52838	0.486	0.13	4.6939e-183	9	Endo-2
Apold1	1.66528e-184	0.537053	0.38	0.083	3.11973e-180	9	Endo-2
Rapgef5	9.75135e-181	0.312311	0.262	0.042	1.82682e-176	9	Endo-2
Bst2	1.11809e-161	0.58096	0.449	0.133	2.09462e-157	9	Endo-2
AU021092	5.60555e-161	0.340296	0.253	0.043	1.05014e-156	9	Endo-2
Hspb1	6.66887e-160	0.715906	0.599	0.226	1.24935e-155	9	Endo-2
Tcim	4.11117e-159	0.51717	0.44	0.129	7.70187e-155	9	Endo-2
Podxl	1.64496e-158	0.34551	0.402	0.101	3.08167e-154	9	Endo-2
Ets1	2.24047e-158	0.441496	0.376	0.095	4.1973e-154	9	Endo-2
Igfbp5	2.47775e-153	1.15787	0.485	0.162	4.64181e-149	9	Endo-2
Tinagl1	6.48039e-153	0.574926	0.408	0.116	1.21404e-148	9	Endo-2
Ly6e	1.29297e-151	0.733938	0.868	0.536	2.42226e-147	9	Endo-2
Sh3bp5	1.11464e-145	0.400971	0.331	0.08	2.08817e-141	9	Endo-2
Gnai2	1.16292e-137	0.609448	0.671	0.334	2.17861e-133	9	Endo-2
Pbx1	4.32476e-133	0.441332	0.411	0.128	8.10201e-129	9	Endo-2
Timp3	1.4138e-132	0.735696	0.837	0.534	2.64861e-128	9	Endo-2
Iigp1	4.37979e-129	0.542405	0.298	0.071	8.2051e-125	9	Endo-2
Cald1	7.60194e-129	0.338146	0.498	0.167	1.42415e-124	9	Endo-2
Mndal	6.11382e-128	0.462357	0.377	0.111	1.14536e-123	9	Endo-2
Klf2	6.37644e-126	0.519057	0.518	0.196	1.19456e-121	9	Endo-2
Irx3	7.15704e-125	0.347783	0.254	0.055	1.3408e-120	9	Endo-2
Sp100	2.26378e-121	0.346971	0.277	0.065	4.24096e-117	9	Endo-2
Ece1	1.28083e-118	0.406293	0.363	0.109	2.39951e-114	9	Endo-2
Isg15	1.39423e-110	0.408431	0.283	0.073	2.61195e-106	9	Endo-2
Elk3	6.67151e-108	0.322881	0.279	0.073	1.24984e-103	9	Endo-2
Marcks	5.91532e-106	0.485583	0.448	0.169	1.10818e-101	9	Endo-2
Id1	1.214e-104	0.289955	0.271	0.069	2.27431e-100	9	Endo-2
Gngt2	2.83947e-104	0.34548	0.283	0.076	5.31947e-100	9	Endo-2
Rai14	1.95255e-103	0.29538	0.255	0.064	3.6579e-99	9	Endo-2
Msn	1.05594e-101	0.613739	0.627	0.349	1.9782e-97	9	Endo-2
Arhgap29	3.49135e-95	0.400341	0.386	0.14	6.54069e-91	9	Endo-2
Adam15	5.67608e-95	0.296969	0.253	0.067	1.06336e-90	9	Endo-2
Srgn	3.75567e-94	0.354921	0.564	0.237	7.03587e-90	9	Endo-2
H2-Q4	4.82156e-94	0.318696	0.315	0.098	9.03271e-90	9	Endo-2
Tpm3	3.64053e-91	0.515497	0.773	0.556	6.82017e-87	9	Endo-2
Ly6a	8.10756e-90	0.427599	0.893	0.588	1.51887e-85	9	Endo-2
Klf7	4.9048e-89	0.385951	0.369	0.136	9.18865e-85	9	Endo-2
Sptbn1	5.46123e-87	0.521956	0.729	0.494	1.02311e-82	9	Endo-2
Tmsb4x	9.84484e-86	0.264259	0.918	0.601	1.84433e-81	9	Endo-2
Sgk1	5.18824e-84	0.409182	0.435	0.18	9.71966e-80	9	Endo-2
Akap12	1.82281e-81	0.616513	0.364	0.14	3.41484e-77	9	Endo-2
Marcksl1	1.42579e-80	0.313433	0.293	0.095	2.67107e-76	9	Endo-2
Tpm4	8.51765e-79	0.557858	0.564	0.322	1.5957e-74	9	Endo-2
H2-K1	1.20083e-76	0.512144	0.687	0.462	2.24963e-72	9	Endo-2
Hspa1b	2.82302e-76	0.679535	0.462	0.229	5.28865e-72	9	Endo-2
Limch1	6.59437e-72	0.37034	0.313	0.117	1.23539e-67	9	Endo-2
Jun	4.42244e-69	0.53023	0.796	0.64	8.28499e-65	9	Endo-2
Fkbp1a	3.33045e-68	0.39752	0.426	0.202	6.23926e-64	9	Endo-2
Serpinh1	1.56426e-67	0.345517	0.359	0.151	2.93049e-63	9	Endo-2
Rdx	3.19891e-64	0.504421	0.558	0.356	5.99284e-60	9	Endo-2
Epas1	1.18873e-63	0.273892	0.279	0.099	2.22697e-59	9	Endo-2
Calm1	1.66533e-63	0.403886	0.869	0.74	3.11982e-59	9	Endo-2
Ifitm2	1.9624e-63	0.441494	0.556	0.318	3.67636e-59	9	Endo-2
Gm8995	2.77495e-63	0.359649	0.306	0.116	5.19858e-59	9	Endo-2
Id3	1.78555e-60	0.383115	0.433	0.211	3.34505e-56	9	Endo-2
Clic4	4.36661e-60	0.369138	0.46	0.238	8.18041e-56	9	Endo-2
Hsp90ab1	6.34291e-60	0.396168	0.92	0.886	1.18828e-55	9	Endo-2
Uaca	8.49014e-60	0.252953	0.257	0.09	1.59054e-55	9	Endo-2
Hspa1a	2.66424e-57	0.569109	0.425	0.223	4.99119e-53	9	Endo-2
Plk2	1.334e-56	0.336422	0.265	0.1	2.49911e-52	9	Endo-2
Ppfibp1	1.25765e-55	0.344274	0.33	0.146	2.35609e-51	9	Endo-2
Rbms1	4.15265e-55	0.34306	0.439	0.229	7.77957e-51	9	Endo-2
Clic5	2.32372e-54	0.275919	0.262	0.098	4.35326e-50	9	Endo-2
Emp1	3.70543e-53	0.351742	0.383	0.184	6.94175e-49	9	Endo-2
Crip2	8.4383e-52	0.309384	0.341	0.156	1.58083e-47	9	Endo-2
Laptm4a	2.8709e-48	0.415886	0.581	0.403	5.37834e-44	9	Endo-2
Cd81	1.18818e-45	0.38198	0.564	0.367	2.22593e-41	9	Endo-2
Serinc3	1.35719e-45	0.337756	0.683	0.498	2.54255e-41	9	Endo-2
App	4.35129e-45	0.355251	0.777	0.698	8.1517e-41	9	Endo-2
Nfib	1.73965e-44	0.287671	0.325	0.156	3.25907e-40	9	Endo-2
Socs3	2.49625e-44	0.415264	0.451	0.268	4.67648e-40	9	Endo-2
Rhob	2.78006e-43	0.381874	0.46	0.277	5.20816e-39	9	Endo-2
Rhoc	1.89869e-40	0.290062	0.324	0.163	3.55701e-36	9	Endo-2
Gnas	8.48067e-39	0.384366	0.685	0.576	1.58877e-34	9	Endo-2
Map4k4	1.57365e-38	0.263785	0.286	0.137	2.94808e-34	9	Endo-2
Xiap	1.64746e-38	0.308886	0.324	0.17	3.08635e-34	9	Endo-2
Crim1	1.57303e-35	0.275255	0.294	0.149	2.94691e-31	9	Endo-2
Macf1	4.98365e-34	0.347319	0.452	0.3	9.33636e-30	9	Endo-2
Itgb1	6.07319e-34	0.369707	0.593	0.468	1.13775e-29	9	Endo-2
Actb	5.4616e-33	0.284143	0.952	0.896	1.02318e-28	9	Endo-2
Ddx5	2.55502e-32	0.288032	0.762	0.69	4.78657e-28	9	Endo-2
Kitl	8.58982e-32	0.289893	0.255	0.126	1.60922e-27	9	Endo-2
Nr2f2	1.68571e-30	0.265797	0.267	0.136	3.158e-26	9	Endo-2
Slk	9.80347e-23	0.301499	0.46	0.347	1.83658e-18	9	Endo-2
Mxd4	3.77296e-22	0.253703	0.334	0.214	7.06827e-18	9	Endo-2
Sept7	1.33274e-21	0.309479	0.473	0.364	2.49675e-17	9	Endo-2
Anxa2	2.23295e-18	0.253599	0.449	0.331	4.18321e-14	9	Endo-2
Anp32a	1.42442e-13	0.265904	0.457	0.387	2.66851e-09	9	Endo-2
Egr1	1.68834e-09	0.273091	0.556	0.511	3.16294e-05	9	Endo-2
Klk1	0	3.39407	0.995	0.34	0	10	DCT2
S100g	0	2.81776	0.954	0.249	0	10	DCT2
Calb1	0	1.7206	0.701	0.092	0	10	DCT2
Clu	0	1.38303	0.994	0.575	0	10	DCT2
Tmem52b	0	1.10964	0.877	0.169	0	10	DCT2
Kl	0	1.09034	0.686	0.146	0	10	DCT2
Pgam2	0	0.557736	0.482	0.07	0	10	DCT2
Gm44120	0	0.408379	0.339	0.03	0	10	DCT2
Trpv5	0	0.350141	0.305	0.026	0	10	DCT2
Atp1b1	3.69692e-284	0.924312	1	0.672	6.92581e-280	10	DCT2
Ltc4s	1.50652e-274	0.464134	0.331	0.044	2.82232e-270	10	DCT2
Scnn1b	1.6997e-234	0.367191	0.384	0.068	3.18422e-230	10	DCT2
Clcnkb	1.15301e-214	0.509243	0.655	0.2	2.16005e-210	10	DCT2
Scnn1g	2.76832e-213	0.279872	0.281	0.04	5.18617e-209	10	DCT2
Atp1a1	7.55397e-206	0.792736	0.973	0.651	1.41516e-201	10	DCT2
Atp2b4	2.71729e-201	0.283491	0.281	0.042	5.09056e-197	10	DCT2
Hsd11b2	1.23889e-196	0.714534	0.493	0.126	2.32094e-192	10	DCT2
Kcnj16	4.10241e-195	0.50676	0.688	0.241	7.68545e-191	10	DCT2
Wfdc2	5.30192e-194	0.623831	0.83	0.338	9.93261e-190	10	DCT2
Kng2	8.26306e-191	0.487578	0.649	0.207	1.548e-186	10	DCT2
Kcnj1	3.80869e-190	0.419464	0.445	0.107	7.1352e-186	10	DCT2
Tspan1	1.0607e-185	0.36972	0.428	0.101	1.98712e-181	10	DCT2
Nudt4	1.10396e-184	0.622333	0.805	0.357	2.06816e-180	10	DCT2
Tmem213	3.89593e-183	0.502667	0.687	0.239	7.29864e-179	10	DCT2
Tacstd2	4.33604e-177	0.52863	0.65	0.222	8.12314e-173	10	DCT2
Rhcg	2.71277e-170	0.393082	0.402	0.095	5.0821e-166	10	DCT2
Cdh16	8.79503e-162	0.552914	0.811	0.392	1.64766e-157	10	DCT2
Acss1	4.87379e-152	0.387512	0.403	0.108	9.13055e-148	10	DCT2
Wnk1	1.07539e-150	0.72704	0.625	0.258	2.01463e-146	10	DCT2
Spp1	5.56045e-150	0.51848	0.999	0.85	1.0417e-145	10	DCT2
S100a1	1.20952e-143	0.55691	0.782	0.384	2.26592e-139	10	DCT2
Iqgap2	1.33493e-143	0.335672	0.395	0.106	2.50086e-139	10	DCT2
Cdo1	5.39465e-138	0.372915	0.395	0.109	1.01063e-133	10	DCT2
Slc16a7	6.37729e-133	0.292304	0.353	0.091	1.19472e-128	10	DCT2
mt-Nd5	1.31558e-131	0.738644	0.985	0.876	2.46461e-127	10	DCT2
Defb1	5.821e-131	0.55064	0.816	0.389	1.09051e-126	10	DCT2
mt-Nd2	5.92419e-128	0.652772	0.97	0.834	1.10984e-123	10	DCT2
Ly6a	5.55711e-126	0.604868	0.949	0.585	1.04107e-121	10	DCT2
Sfrp1	1.26023e-125	0.521999	0.383	0.11	2.36092e-121	10	DCT2
mt-Nd4	2.67154e-123	0.75609	0.948	0.733	5.00487e-119	10	DCT2
Slc12a3	1.5185e-122	0.878873	0.493	0.181	2.84476e-118	10	DCT2
mt-Cytb	4.5778e-118	0.746535	0.988	0.884	8.57606e-114	10	DCT2
Tmprss2	2.02396e-111	0.268636	0.32	0.087	3.79169e-107	10	DCT2
Scnn1a	2.16548e-108	0.273731	0.338	0.097	4.0568e-104	10	DCT2
Fxyd2	2.13564e-103	0.493295	0.887	0.562	4.00091e-99	10	DCT2
mt-Nd1	3.86807e-102	0.615563	0.949	0.769	7.24644e-98	10	DCT2
Ldhb	4.71145e-102	0.435473	0.868	0.519	8.82643e-98	10	DCT2
Cdh1	2.00014e-99	0.347815	0.563	0.237	3.74707e-95	10	DCT2
Sgms2	2.86325e-99	0.306695	0.348	0.11	5.36402e-95	10	DCT2
Tfcp2l1	1.02064e-95	0.329224	0.497	0.198	1.91206e-91	10	DCT2
mt-Co1	2.97818e-95	0.82299	0.848	0.586	5.57932e-91	10	DCT2
Mal	1.63312e-92	0.380067	0.722	0.364	3.0595e-88	10	DCT2
Hoxd8	3.56387e-85	0.269885	0.386	0.139	6.67656e-81	10	DCT2
Cldn4	4.74558e-81	0.382288	0.652	0.318	8.89037e-77	10	DCT2
mt-Rnr2	6.51514e-81	0.425015	1	1	1.22055e-76	10	DCT2
Col4a4	3.12987e-78	0.284176	0.433	0.175	5.8635e-74	10	DCT2
Itm2b	1.43648e-75	0.383389	0.929	0.717	2.6911e-71	10	DCT2
Ctsd	9.51749e-66	0.405086	0.762	0.485	1.78301e-61	10	DCT2
Atp6v0e	1.46681e-60	0.292531	0.523	0.268	2.74792e-56	10	DCT2
Nfe2l1	2.19277e-57	0.264262	0.543	0.29	4.10793e-53	10	DCT2
Cd9	7.2651e-56	0.268553	0.648	0.367	1.36104e-51	10	DCT2
Clint1	5.39595e-52	0.250389	0.46	0.233	1.01088e-47	10	DCT2
Wls	1.41216e-49	0.252284	0.496	0.267	2.64554e-45	10	DCT2
mt-Rnr1	5.34691e-42	0.313016	0.991	0.967	1.00169e-37	10	DCT2
Syne2	2.81988e-35	0.280822	0.647	0.437	5.28277e-31	10	DCT2
Cryab	0	1.63488	0.794	0.131	0	11	TL
Fst	0	1.13653	0.251	0.007	0	11	TL
Ankrd1	0	1.03556	0.391	0.038	0	11	TL
Bst1	0	0.640318	0.397	0.018	0	11	TL
Cp	4.78472e-306	0.667537	0.481	0.074	8.96369e-302	11	TL
Nupr1	1.19396e-291	1.12149	0.61	0.134	2.23676e-287	11	TL
Gprc5a	1.00533e-281	0.456876	0.38	0.05	1.88339e-277	11	TL
Prr15	1.82965e-275	0.401974	0.299	0.031	3.42767e-271	11	TL
Akap12	1.95656e-256	1.40112	0.579	0.133	3.66542e-252	11	TL
Cdh6	8.84391e-226	0.282559	0.257	0.027	1.65682e-221	11	TL
Srd5a1	1.50218e-206	0.369992	0.282	0.037	2.81419e-202	11	TL
S100a6	3.55628e-205	1.43348	0.732	0.292	6.66233e-201	11	TL
Anxa2	8.41453e-173	0.787451	0.756	0.319	1.57638e-168	11	TL
Apela	2.64904e-167	0.534933	0.3	0.051	4.96272e-163	11	TL
Ehf	1.74218e-164	0.507135	0.456	0.117	3.2638e-160	11	TL
Epcam	1.37658e-159	0.641728	0.777	0.331	2.57888e-155	11	TL
Tpm1	7.39189e-157	0.599228	0.728	0.301	1.3848e-152	11	TL
Aqp1	4.74702e-147	0.964319	0.338	0.075	8.89308e-143	11	TL
S100a11	1.17122e-146	0.627885	0.921	0.533	2.19417e-142	11	TL
Pax8	4.80143e-142	0.347489	0.353	0.079	8.99499e-138	11	TL
Plau	1.43219e-140	0.595776	0.509	0.162	2.68307e-136	11	TL
Hbegf	3.77245e-137	0.88657	0.785	0.404	7.06731e-133	11	TL
Plet1	2.12592e-135	0.492434	0.473	0.137	3.9827e-131	11	TL
Sdc4	1.00817e-132	0.795788	0.892	0.572	1.88871e-128	11	TL
Scin	7.88276e-131	0.341736	0.345	0.081	1.47676e-126	11	TL
Tshz2	1.14489e-120	0.28042	0.282	0.058	2.14484e-116	11	TL
Krt18	2.71488e-117	0.610002	0.564	0.212	5.08606e-113	11	TL
2200002D01Rik	3.73647e-117	0.332016	0.321	0.078	6.99991e-113	11	TL
Tsc22d1	2.38475e-104	0.629319	0.827	0.51	4.46758e-100	11	TL
Dcdc2a	2.43267e-102	0.36223	0.367	0.108	4.55736e-98	11	TL
S100a10	5.82837e-98	0.642199	0.797	0.501	1.09189e-93	11	TL
Bicc1	6.81513e-97	0.411891	0.491	0.189	1.27675e-92	11	TL
Hoxb9	1.09404e-94	0.299753	0.328	0.093	2.04957e-90	11	TL
Bcam	7.99894e-90	0.431347	0.502	0.202	1.49852e-85	11	TL
Prom1	5.88765e-86	0.343596	0.303	0.087	1.10299e-81	11	TL
Cobl	1.14343e-83	0.264597	0.266	0.071	2.1421e-79	11	TL
F2rl1	9.14935e-83	0.317642	0.377	0.129	1.71404e-78	11	TL
Spint2	1.13935e-77	0.374526	0.586	0.277	2.13445e-73	11	TL
Ctsl	1.10464e-75	0.640135	0.752	0.488	2.06942e-71	11	TL
Cd24a	1.33908e-74	0.434282	0.804	0.469	2.50863e-70	11	TL
Sfn	2.33204e-74	0.575556	0.481	0.212	4.36885e-70	11	TL
Atf3	5.82446e-72	0.623202	0.799	0.553	1.09115e-67	11	TL
Igfbp7	6.46688e-72	0.455304	0.875	0.623	1.21151e-67	11	TL
Dag1	1.23406e-71	0.366105	0.396	0.155	2.31189e-67	11	TL
Hspb1	1.85764e-71	0.383677	0.525	0.233	3.48011e-67	11	TL
Wwc1	1.87712e-68	0.355383	0.396	0.158	3.5166e-64	11	TL
Rdh10	7.56804e-66	0.271548	0.278	0.088	1.4178e-61	11	TL
Krt8	2.33887e-65	0.546196	0.638	0.358	4.38164e-61	11	TL
Fosb	3.84565e-65	0.594228	0.687	0.428	7.20444e-61	11	TL
Tmsb10	1.5265e-64	0.327695	0.62	0.323	2.85975e-60	11	TL
F3	4.11802e-63	0.410423	0.335	0.126	7.71471e-59	11	TL
Cldn4	7.85555e-60	0.448922	0.6	0.322	1.47166e-55	11	TL
Cldn7	3.29012e-57	0.328937	0.544	0.273	6.16372e-53	11	TL
Gls	4.06653e-54	0.30958	0.482	0.241	7.61823e-50	11	TL
Myl12a	4.87908e-54	0.390497	0.698	0.452	9.14046e-50	11	TL
Atpif1	8.73196e-54	0.388963	0.734	0.495	1.63585e-49	11	TL
Gclm	1.39852e-52	0.354697	0.396	0.181	2.61999e-48	11	TL
Gstm1	2.06411e-51	0.423654	0.346	0.148	3.86691e-47	11	TL
Klf6	4.49509e-51	0.396112	0.808	0.602	8.42111e-47	11	TL
Cd2ap	7.40517e-51	0.379285	0.698	0.458	1.38729e-46	11	TL
Errfi1	1.28933e-50	0.420802	0.557	0.319	2.41544e-46	11	TL
Ptma	4.36593e-50	0.334945	0.881	0.711	8.17913e-46	11	TL
Tmem176b	1.68452e-49	0.535735	0.661	0.455	3.15577e-45	11	TL
Litaf	7.77562e-48	0.262859	0.484	0.246	1.45668e-43	11	TL
Tspan8	2.01289e-45	0.326696	0.456	0.23	3.77095e-41	11	TL
H3f3b	1.02266e-42	0.390404	0.844	0.644	1.91585e-38	11	TL
Tcim	3.47669e-42	0.273769	0.314	0.136	6.51324e-38	11	TL
Txn1	8.24987e-42	0.304122	0.637	0.416	1.54553e-37	11	TL
Rpl14	2.20706e-39	0.321006	0.812	0.632	4.13471e-35	11	TL
Adgrg1	4.03716e-39	0.253103	0.468	0.255	7.56322e-35	11	TL
Lmna	4.80448e-39	0.32338	0.478	0.269	9.00072e-35	11	TL
Ndufb8	1.14428e-38	0.359275	0.496	0.292	2.14369e-34	11	TL
Vmp1	1.48427e-38	0.333949	0.6	0.39	2.78063e-34	11	TL
Npm1	1.70239e-38	0.347684	0.586	0.382	3.18926e-34	11	TL
Gdf15	1.6844e-37	0.326647	0.299	0.132	3.15555e-33	11	TL
Rpl4	1.61844e-36	0.28123	0.791	0.622	3.03198e-32	11	TL
Egr1	1.09109e-35	0.391214	0.712	0.505	2.04404e-31	11	TL
Itgb1	1.8717e-35	0.275354	0.679	0.466	3.50644e-31	11	TL
Rpl13	6.34912e-34	0.268167	0.857	0.735	1.18944e-29	11	TL
Adamts1	6.67046e-33	0.252916	0.506	0.292	1.24964e-28	11	TL
Rps2	7.64813e-33	0.315832	0.69	0.518	1.4328e-28	11	TL
Npnt	2.04707e-32	0.343314	0.289	0.139	3.83498e-28	11	TL
Hsp90aa1	3.15819e-31	0.260528	0.794	0.614	5.91655e-27	11	TL
Rpl3	1.52727e-29	0.266454	0.691	0.522	2.86119e-25	11	TL
Eef1a1	3.62376e-29	0.261744	0.71	0.541	6.78875e-25	11	TL
Ncl	4.59294e-28	0.342816	0.781	0.65	8.60441e-24	11	TL
Rplp0	8.51794e-28	0.288645	0.682	0.513	1.59575e-23	11	TL
Rps5	1.08496e-27	0.258579	0.697	0.529	2.03257e-23	11	TL
Tmem176a	1.5302e-26	0.312307	0.539	0.378	2.86668e-22	11	TL
Zfp36l1	1.7938e-25	0.275485	0.757	0.593	3.36051e-21	11	TL
Actg1	3.40803e-25	0.268892	0.606	0.451	6.3846e-21	11	TL
Cstb	3.94022e-25	0.260038	0.505	0.344	7.3816e-21	11	TL
Nfkbia	2.09491e-23	0.309965	0.586	0.413	3.9246e-19	11	TL
Ier3	2.25984e-23	0.261233	0.547	0.374	4.23358e-19	11	TL
Mpc2	4.10364e-22	0.266922	0.513	0.354	7.68776e-18	11	TL
Btg2	1.21988e-21	0.324631	0.68	0.53	2.28532e-17	11	TL
Mrps6	4.79788e-20	0.291109	0.386	0.248	8.98835e-16	11	TL
Fos	1.51726e-17	0.38694	0.722	0.619	2.84243e-13	11	TL
Anxa1	2.24443e-16	0.350086	0.272	0.166	4.20471e-12	11	TL
Tm4sf1	0	1.60359	0.926	0.145	0	12	Endo-3
Ly6c1	0	1.50394	0.919	0.227	0	12	Endo-3
Apold1	0	1.35272	0.734	0.077	0	12	Endo-3
Vim	0	1.28696	0.854	0.177	0	12	Endo-3
Klf2	0	1.25898	0.805	0.193	0	12	Endo-3
Ptprb	0	1.09245	0.773	0.104	0	12	Endo-3
Pecam1	0	1.00448	0.755	0.103	0	12	Endo-3
Adgrf5	0	0.98428	0.838	0.151	0	12	Endo-3
Sema3g	0	0.960011	0.613	0.038	0	12	Endo-3
Sox17	0	0.946552	0.655	0.023	0	12	Endo-3
Cldn5	0	0.928199	0.424	0.018	0	12	Endo-3
Fbln5	0	0.926493	0.54	0.014	0	12	Endo-3
Cd200	0	0.920655	0.748	0.109	0	12	Endo-3
Slc9a3r2	0	0.825847	0.65	0.097	0	12	Endo-3
Adgrl4	0	0.807093	0.636	0.073	0	12	Endo-3
Cd93	0	0.793725	0.641	0.068	0	12	Endo-3
Epas1	0	0.791182	0.657	0.09	0	12	Endo-3
Flt1	0	0.738904	0.674	0.114	0	12	Endo-3
Esam	0	0.733302	0.611	0.08	0	12	Endo-3
Podxl	0	0.731277	0.674	0.097	0	12	Endo-3
Jam2	0	0.730308	0.514	0.018	0	12	Endo-3
Igfbp3	0	0.728277	0.423	0.039	0	12	Endo-3
Thbd	0	0.675669	0.544	0.073	0	12	Endo-3
Mmrn2	0	0.668988	0.525	0.052	0	12	Endo-3
S1pr1	0	0.661758	0.555	0.06	0	12	Endo-3
Id1	0	0.658641	0.496	0.065	0	12	Endo-3
Cdh5	0	0.642074	0.574	0.068	0	12	Endo-3
Heg1	0	0.587539	0.452	0.049	0	12	Endo-3
Ecscr	0	0.546538	0.47	0.046	0	12	Endo-3
Lmo2	0	0.526283	0.475	0.053	0	12	Endo-3
8430408G22Rik	0	0.520311	0.276	0.013	0	12	Endo-3
Lrrc32	0	0.518541	0.408	0.032	0	12	Endo-3
Rasip1	0	0.506275	0.445	0.052	0	12	Endo-3
Tie1	0	0.505825	0.451	0.045	0	12	Endo-3
Ltbp4	0	0.487726	0.315	0.023	0	12	Endo-3
Nos3	0	0.482646	0.357	0.014	0	12	Endo-3
Palmd	0	0.478101	0.396	0.033	0	12	Endo-3
Eln	0	0.474787	0.285	0.017	0	12	Endo-3
Grrp1	0	0.438487	0.403	0.038	0	12	Endo-3
Fbln2	0	0.414898	0.283	0.007	0	12	Endo-3
Gja1	0	0.394382	0.347	0.025	0	12	Endo-3
Jag2	0	0.302081	0.268	0.011	0	12	Endo-3
Uaca	7.06812e-306	0.639462	0.548	0.084	1.32414e-301	12	Endo-3
Adcy4	1.81508e-305	0.294249	0.259	0.016	3.40036e-301	12	Endo-3
Icam2	5.73948e-303	0.470697	0.394	0.042	1.07523e-298	12	Endo-3
Sparc	7.7496e-303	1.03863	0.85	0.208	1.45181e-298	12	Endo-3
Erg	2.21358e-302	0.463437	0.424	0.048	4.14693e-298	12	Endo-3
Sema7a	6.69797e-300	0.372035	0.338	0.03	1.2548e-295	12	Endo-3
Meis2	8.86618e-291	0.586488	0.579	0.093	1.66099e-286	12	Endo-3
Egfl7	4.87519e-290	0.687427	0.629	0.11	9.13318e-286	12	Endo-3
Ifitm3	8.05795e-276	1.05658	0.914	0.293	1.50958e-271	12	Endo-3
Acvrl1	9.22518e-256	0.358416	0.336	0.035	1.72824e-251	12	Endo-3
Ramp2	8.9292e-255	0.531732	0.442	0.062	1.6728e-250	12	Endo-3
Rhoj	2.19364e-252	0.412633	0.327	0.034	4.10957e-248	12	Endo-3
Timp3	1.98665e-251	1.33888	0.967	0.535	3.72179e-247	12	Endo-3
Edn1	1.61872e-249	0.587499	0.343	0.039	3.0325e-245	12	Endo-3
Ehd4	3.53278e-247	0.930202	0.725	0.201	6.6183e-243	12	Endo-3
Timeless	8.46538e-247	0.342114	0.301	0.029	1.5859e-242	12	Endo-3
Ebf1	2.03501e-243	0.309137	0.294	0.028	3.81238e-239	12	Endo-3
Ccnd2	1.15501e-240	0.643559	0.518	0.093	2.1638e-236	12	Endo-3
Acer2	4.28282e-234	0.411048	0.361	0.045	8.02343e-230	12	Endo-3
Samd12	2.10889e-233	0.316469	0.287	0.028	3.95079e-229	12	Endo-3
Klf4	1.80619e-232	0.890349	0.704	0.19	3.38372e-228	12	Endo-3
Gimap6	3.84681e-230	0.519486	0.491	0.083	7.20661e-226	12	Endo-3
Cavin3	9.37817e-223	0.520158	0.423	0.065	1.75691e-218	12	Endo-3
Glul	1.56437e-217	0.88463	0.627	0.164	2.9307e-213	12	Endo-3
Cldn15	1.47564e-214	0.278738	0.257	0.024	2.76447e-210	12	Endo-3
Tmem252	2.6494e-212	0.693717	0.53	0.109	4.96338e-208	12	Endo-3
Arhgef15	7.27763e-210	0.286593	0.264	0.026	1.36339e-205	12	Endo-3
Emp1	5.16837e-207	0.949143	0.644	0.179	9.68243e-203	12	Endo-3
Ece1	1.35665e-204	0.575736	0.523	0.108	2.54155e-200	12	Endo-3
Prex2	6.01123e-204	0.351982	0.322	0.041	1.12614e-199	12	Endo-3
Grasp	8.88783e-203	0.423635	0.349	0.049	1.66505e-198	12	Endo-3
Fxyd5	3.08536e-202	0.620928	0.637	0.156	5.78012e-198	12	Endo-3
Ushbp1	2.80225e-197	0.378151	0.319	0.041	5.24973e-193	12	Endo-3
Jcad	3.80788e-196	0.298133	0.264	0.028	7.13368e-192	12	Endo-3
Eng	1.37015e-194	0.551373	0.507	0.102	2.56683e-190	12	Endo-3
Jag1	2.71142e-192	0.530686	0.354	0.054	5.07958e-188	12	Endo-3
Ceacam1	1.15883e-191	0.335348	0.326	0.044	2.17094e-187	12	Endo-3
Crip2	6.21377e-190	0.640041	0.595	0.151	1.16409e-185	12	Endo-3
Gm8995	2.45965e-189	0.601191	0.519	0.113	4.6079e-185	12	Endo-3
S100a4	5.12947e-187	0.382918	0.342	0.049	9.60956e-183	12	Endo-3
Hspb1	1.21252e-186	0.770816	0.741	0.228	2.27153e-182	12	Endo-3
Crip1	2.26988e-186	0.897347	0.674	0.202	4.25239e-182	12	Endo-3
Cavin1	1.46926e-185	0.458275	0.449	0.087	2.75251e-181	12	Endo-3
Myct1	1.16387e-184	0.304208	0.276	0.033	2.1804e-180	12	Endo-3
Rflnb	1.94506e-184	0.425612	0.356	0.055	3.64387e-180	12	Endo-3
Fabp4	2.85946e-184	0.987063	0.505	0.108	5.35692e-180	12	Endo-3
Pi16	9.98931e-181	0.485719	0.342	0.051	1.8714e-176	12	Endo-3
Kitl	8.38931e-180	0.609121	0.521	0.12	1.57165e-175	12	Endo-3
Dnm3	3.96296e-179	0.273321	0.273	0.033	7.42421e-175	12	Endo-3
Adam15	9.12813e-179	0.428783	0.382	0.066	1.71006e-174	12	Endo-3
Cd34	2.19633e-174	0.35523	0.349	0.054	4.11461e-170	12	Endo-3
Clic5	1.34415e-171	0.486273	0.461	0.094	2.51813e-167	12	Endo-3
Lrrc8c	1.7323e-170	0.272072	0.268	0.033	3.2453e-166	12	Endo-3
Sparcl1	1.82396e-169	0.453789	0.375	0.064	3.41701e-165	12	Endo-3
Calcrl	2.30967e-168	0.386751	0.303	0.044	4.32694e-164	12	Endo-3
Tcf4	1.6349e-165	0.500666	0.577	0.151	3.06282e-161	12	Endo-3
Clic4	7.94414e-165	0.684839	0.692	0.234	1.48825e-160	12	Endo-3
Mgp	2.88746e-162	1.07264	0.387	0.075	5.40938e-158	12	Endo-3
Tek	1.15471e-158	0.317532	0.331	0.053	2.16324e-154	12	Endo-3
Tmem88	3.43095e-158	0.284481	0.285	0.04	6.42755e-154	12	Endo-3
Rapgef5	2.64586e-157	0.299218	0.299	0.045	4.95675e-153	12	Endo-3
Hip1	1.90921e-156	0.356568	0.35	0.061	3.57671e-152	12	Endo-3
Cdc14a	2.85228e-156	0.313576	0.29	0.043	5.34346e-152	12	Endo-3
Rsad2	5.77174e-156	0.484958	0.35	0.061	1.08128e-151	12	Endo-3
Cavin2	2.15273e-152	0.64974	0.516	0.135	4.03293e-148	12	Endo-3
Pmp22	3.98123e-152	0.341664	0.32	0.053	7.45844e-148	12	Endo-3
Cdkn1a	4.07038e-152	0.893563	0.787	0.34	7.62545e-148	12	Endo-3
B2m	3.81602e-146	0.786086	0.956	0.521	7.14893e-142	12	Endo-3
H2-D1	6.53832e-146	0.743615	0.894	0.468	1.22489e-141	12	Endo-3
Slfn5	8.35217e-146	0.485066	0.526	0.135	1.5647e-141	12	Endo-3
Ets1	5.03563e-144	0.440047	0.433	0.098	9.43375e-140	12	Endo-3
1700025G04Rik	1.20123e-140	0.381051	0.324	0.059	2.25038e-136	12	Endo-3
4931406P16Rik	4.08204e-135	0.339247	0.335	0.063	7.6473e-131	12	Endo-3
Serpine2	6.66412e-135	0.357638	0.359	0.07	1.24846e-130	12	Endo-3
Utrn	1.26375e-133	0.52787	0.498	0.14	2.36751e-129	12	Endo-3
Socs3	5.45719e-133	0.64737	0.697	0.263	1.02235e-128	12	Endo-3
Syn3	4.33872e-131	0.271423	0.296	0.052	8.12816e-127	12	Endo-3
Calm1	8.60553e-131	0.66436	0.967	0.739	1.61216e-126	12	Endo-3
Isg15	2.00547e-130	0.451767	0.357	0.074	3.75705e-126	12	Endo-3
AU021092	2.16161e-128	0.299076	0.278	0.046	4.04955e-124	12	Endo-3
Mllt3	7.6322e-127	0.27713	0.268	0.044	1.42982e-122	12	Endo-3
Notch1	1.23835e-126	0.325066	0.333	0.066	2.31992e-122	12	Endo-3
Fas	5.82709e-126	0.315462	0.317	0.06	1.09165e-121	12	Endo-3
[truncated: 2,038 more rows]
