# Supplementary material for: Ferroptotic stress promotes the accumulation of pro-inflammatory proximal tubular cells in maladaptive renal repair
Source: eLife. 2021 Jul 19;10:e68603. doi: 10.7554/eLife.68603 (PMC8318592; doi:10.7554/eLife.68603)
Supplement: Supplementary file 2. [file elife-68603-supp2.xlsx]

## Sheet: DA-PT (IRI) vs PT (IRI)
gene	p_val	avg_logFC	pct.1	pct.2	p_val_adj
Spp1	5.84e-169	1.79866	0.987	0.829	1.09e-164
Akap12	1.74e-234	1.35856	0.747	0.1	3.26e-230
Cp	0	1.34411	0.842	0.063	0
Igfbp7	3.8e-195	1.30164	0.987	0.633	7.11e-191
Cxcl1	3.81e-77	1.25814	0.522	0.167	7.14e-73
Tmsb4x	5e-213	1.18903	0.818	0.172	9.36e-209
Atf3	2.69e-149	1.12615	0.831	0.284	5.03e-145
Ccl2	4.21e-126	1.1139	0.311	0.016	7.89e-122
Ly6e	4.01e-169	1.10324	0.767	0.194	7.51e-165
Ldhb	1.77e-70	1.10132	0.789	0.609	3.31e-66
Hspb1	2.5e-213	1.07744	0.689	0.088	4.68e-209
S100a6	1.35e-152	1.07665	0.658	0.135	2.54e-148
Cxcl2	1.18e-97	1.07336	0.407	0.068	2.21e-93
Ankrd1	5.72e-211	1.07146	0.493	0.023	1.07e-206
Havcr1	7.2e-88	1.06772	0.564	0.18	1.35e-83
B2m	4.71e-167	1.0382	0.853	0.29	8.82e-163
Vcam1	1.74e-235	1.02913	0.618	0.047	3.26e-231
Tmsb10	9.27e-290	0.990881	0.789	0.079	1.74e-285
Egr1	1.51e-137	0.977696	0.711	0.192	2.83e-133
Nfkbia	4.85e-123	0.968834	0.644	0.17	9.09e-119
Sdc4	3.07e-92	0.93393	0.844	0.473	5.76e-88
Tpm1	2.56e-152	0.90144	0.713	0.175	4.8e-148
Adamts1	4e-122	0.878885	0.753	0.247	7.49e-118
Ier3	2.85e-127	0.836275	0.571	0.118	5.34e-123
Ptma	1.2e-133	0.824754	0.949	0.578	2.24e-129
S100a11	8.32e-152	0.819549	0.84	0.276	1.56e-147
Tmem176b	2.13e-93	0.814415	0.867	0.515	4e-89
Anxa2	4.63e-149	0.805603	0.68	0.148	8.67e-145
Cald1	4.87e-164	0.773877	0.48	0.043	9.12e-160
Vim	3.64e-132	0.768926	0.449	0.054	6.82e-128
Sparc	6.14e-83	0.76847	0.449	0.105	1.15e-78
Col4a1	1.18e-109	0.758301	0.627	0.176	2.22e-105
Cstb	1.58e-100	0.754902	0.727	0.279	2.95e-96
Fos	5.49e-67	0.738424	0.727	0.339	1.03e-62
H2-K1	7.2e-111	0.729293	0.722	0.243	1.35e-106
Actb	2.89e-97	0.723491	0.973	0.762	5.41e-93
Dcdc2a	3.21e-178	0.69775	0.551	0.058	6.01e-174
Nes	3.29e-174	0.690051	0.482	0.038	6.17e-170
Zfp36l1	4.99e-79	0.68419	0.889	0.537	9.34e-75
C3	4.64e-159	0.671854	0.489	0.047	8.69e-155
Plat	7.72e-127	0.6679	0.52	0.087	1.45e-122
Myl12a	4.9e-116	0.660083	0.693	0.201	9.17e-112
Rps9	1.86e-85	0.634329	0.84	0.454	3.49e-81
Calm1	1.76e-82	0.630531	0.876	0.48	3.29e-78
Lgals1	5.18e-93	0.630139	0.629	0.196	9.7e-89
Gc	9.11e-94	0.628315	0.384	0.061	1.71e-89
Cd74	3.45e-56	0.6253	0.5	0.185	6.47e-52
Rps3	7.89e-76	0.618069	0.836	0.496	1.48e-71
Sox4	3.46e-125	0.617572	0.562	0.105	6.48e-121
Klf6	1.03e-55	0.60546	0.807	0.512	1.93e-51
Tsc22d1	5.38e-57	0.600962	0.818	0.507	1.01e-52
Itga1	3.66e-117	0.595808	0.562	0.117	6.86e-113
Rps19	1.02e-74	0.594675	0.818	0.449	1.92e-70
Hbegf	1.17e-54	0.58628	0.66	0.307	2.19e-50
Rps14	1.65e-69	0.579575	0.769	0.405	3.09e-65
Anxa5	2.31e-114	0.578247	0.596	0.136	4.33e-110
Cryab	4.46e-97	0.559749	0.522	0.116	8.35e-93
Zfp36	1.39e-60	0.55156	0.553	0.211	2.61e-56
Actn1	9.93e-93	0.540692	0.529	0.13	1.86e-88
Id3	6.54e-53	0.532303	0.404	0.122	1.22e-48
Dynll1	1.58e-96	0.532177	0.636	0.187	2.95e-92
H2-D1	2.45e-85	0.529743	0.589	0.182	4.59e-81
Btg2	5.93e-65	0.529289	0.591	0.217	1.11e-60
Junb	1e-68	0.525271	0.562	0.186	1.88e-64
Tmem176a	4.5e-42	0.518513	0.724	0.472	8.44e-38
Clic1	2.01e-66	0.514985	0.573	0.216	3.76e-62
Dag1	4.21e-75	0.512561	0.407	0.091	7.88e-71
H3f3b	4.84e-64	0.512305	0.78	0.382	9.07e-60
Bcam	1.61e-112	0.508004	0.42	0.057	3.02e-108
Rdh10	9.14e-88	0.505641	0.436	0.088	1.71e-83
Itgb1	3.52e-58	0.503365	0.676	0.316	6.59e-54
Vmp1	2.74e-51	0.498079	0.709	0.4	5.13e-47
Cdh6	3.16e-152	0.496965	0.367	0.017	5.93e-148
Ctsl	1.03e-32	0.494449	0.807	0.607	1.93e-28
Tpm4	1.02e-89	0.492759	0.578	0.161	1.91e-85
Bicc1	1.09e-66	0.491886	0.587	0.215	2.04e-62
Cyr61	1.91e-32	0.486463	0.629	0.381	3.58e-28
Tagln2	2.34e-60	0.485735	0.613	0.263	4.39e-56
Cited2	6.23e-52	0.484623	0.513	0.191	1.17e-47
Arpc2	7.01e-57	0.482042	0.609	0.261	1.31e-52
Rps2	5.45e-54	0.471473	0.751	0.412	1.02e-49
Rps5	6.52e-52	0.470084	0.707	0.371	1.22e-47
Pnrc1	6.24e-50	0.470066	0.578	0.254	1.17e-45
Rplp0	1.38e-54	0.470046	0.731	0.396	2.59e-50
Sytl2	1.59e-126	0.468899	0.398	0.039	2.97e-122
Cd9	3.37e-98	0.457162	0.407	0.065	6.31e-94
Cd44	1.95e-120	0.457012	0.336	0.024	3.65e-116
Calm2	1.92e-63	0.455234	0.529	0.175	3.6e-59
Rps4x	7.18e-60	0.451784	0.602	0.243	1.34e-55
Rpl32	4.96e-46	0.448731	0.764	0.465	9.29e-42
Rpl23a	1.31e-57	0.4465	0.673	0.315	2.45e-53
Rps26	1.08e-57	0.446444	0.72	0.365	2.03e-53
Rps8	1.46e-49	0.445713	0.838	0.577	2.73e-45
Eif1	4.39e-51	0.444249	0.736	0.407	8.22e-47
Rpl3	1.75e-50	0.444155	0.72	0.387	3.27e-46
Myl6	3.33e-42	0.441376	0.558	0.27	6.25e-38
Pfn1	1e-52	0.441347	0.647	0.304	1.88e-48
Adamts5	2.24e-140	0.440968	0.291	0.006	4.19e-136
Rpl13	2.79e-50	0.437809	0.889	0.65	5.23e-46
Rps27	5.63e-56	0.435934	0.671	0.317	1.06e-51
Scin	3.01e-133	0.433681	0.373	0.028	5.63e-129
Rps7	2.63e-54	0.431992	0.638	0.287	4.93e-50
Tuba1a	1.16e-117	0.430787	0.329	0.024	2.17e-113
Ptgds	5.53e-125	0.430308	0.338	0.022	1.04e-120
Timp2	7.57e-122	0.428538	0.282	0.011	1.42e-117
Rps24	1.78e-49	0.424113	0.818	0.514	3.34e-45
Rpl41	5.19e-46	0.418868	0.802	0.496	9.73e-42
F3	1.84e-28	0.418068	0.436	0.208	3.45e-24
Aplp2	1.86e-35	0.417767	0.5	0.24	3.49e-31
Rpl7	8.61e-58	0.417146	0.604	0.25	1.61e-53
Rplp1	1.12e-47	0.414477	0.849	0.588	2.09e-43
Clic4	2.43e-63	0.413995	0.507	0.163	4.56e-59
App	1.04e-37	0.411507	0.844	0.634	1.95e-33
Anxa3	4.84e-87	0.411063	0.387	0.066	9.06e-83
Tcim	2.79e-73	0.408288	0.336	0.058	5.23e-69
Rbp1	1.86e-119	0.407924	0.347	0.028	3.49e-115
Slc6a6	6.67e-16	0.407902	0.487	0.327	1.25e-11
Ly6a	5.63e-19	0.407674	0.513	0.332	1.06e-14
Sh3bgrl3	8.55e-71	0.407513	0.433	0.106	1.6e-66
Npm1	7.35e-33	0.407022	0.673	0.414	1.38e-28
Cldn1	9.6e-109	0.40184	0.373	0.042	1.8e-104
S100a10	9.42e-33	0.398495	0.816	0.561	1.77e-28
Gnas	7.91e-39	0.396914	0.656	0.372	1.48e-34
Nedd4	5.19e-35	0.396518	0.629	0.368	9.72e-31
Rpl18	3.48e-40	0.395376	0.609	0.317	6.52e-36
Nfkbiz	9.08e-37	0.388831	0.451	0.193	1.7e-32
Cfl1	3.83e-43	0.388075	0.604	0.297	7.17e-39
Cd24a	5.26e-53	0.387681	0.382	0.109	9.85e-49
Cpe	8.01e-53	0.386829	0.467	0.157	1.5e-48
Bhlhe40	7.99e-47	0.386276	0.498	0.197	1.5e-42
Clu	5.41e-35	0.386219	0.616	0.347	1.01e-30
2200002D01Rik	2.05e-57	0.385021	0.462	0.147	3.83e-53
Cd47	3.49e-69	0.384993	0.431	0.108	6.53e-65
Rps18	1.77e-48	0.382365	0.58	0.257	3.32e-44
Rpl14	5.85e-37	0.382339	0.78	0.524	1.1e-32
Rpl39	2.26e-43	0.377815	0.593	0.286	4.24e-39
Tpm3	4.62e-36	0.37513	0.727	0.455	8.66e-32
Rps27a	1.79e-42	0.374449	0.658	0.338	3.35e-38
Laptm4a	2.69e-46	0.374362	0.493	0.194	5.04e-42
Rpl4	1.02e-36	0.373764	0.82	0.584	1.91e-32
Gxylt2	5.16e-128	0.372444	0.302	0.013	9.66e-124
Rpl17	8.88e-44	0.372048	0.707	0.394	1.66e-39
Hmgn1	1.67e-39	0.371235	0.576	0.284	3.13e-35
Ncam1	4.7e-103	0.369703	0.264	0.015	8.8e-99
Aoc1	1.27e-81	0.369598	0.271	0.028	2.37e-77
Cyb5r3	8.45e-42	0.365505	0.553	0.252	1.58e-37
Msn	1.03e-31	0.364993	0.531	0.279	1.93e-27
Rps3a1	4.13e-45	0.363389	0.556	0.241	7.73e-41
Sox9	1.88e-63	0.362559	0.371	0.084	3.52e-59
Filip1l	4.08e-100	0.358554	0.296	0.024	7.64e-96
Rps12	1.78e-33	0.357463	0.647	0.368	3.34e-29
Arpc1b	9.98e-57	0.356844	0.351	0.085	1.87e-52
Rpl6	6.49e-37	0.347762	0.622	0.333	1.22e-32
Gnai2	9.2e-41	0.346029	0.467	0.192	1.72e-36
Spint2	2.98e-43	0.34414	0.484	0.198	5.59e-39
Fosb	3.09e-31	0.34349	0.531	0.253	5.79e-27
Rpl5	1.65e-33	0.342322	0.629	0.349	3.08e-29
Plscr1	6.75e-51	0.341848	0.322	0.08	1.27e-46
Myh9	3.15e-31	0.340876	0.496	0.246	5.91e-27
Tubb5	5.21e-57	0.339789	0.34	0.077	9.75e-53
Ppia	1.7e-43	0.339454	0.584	0.261	3.19e-39
Npnt	1.18e-44	0.339362	0.318	0.088	2.21e-40
Rpl21	1.04e-36	0.338277	0.573	0.295	1.95e-32
Rps15a	1.1e-36	0.333928	0.58	0.294	2.07e-32
Marcks	8.03e-81	0.333926	0.269	0.028	1.51e-76
Rtn4	2.33e-34	0.331026	0.564	0.283	4.37e-30
Eef1a1	6.81e-30	0.330379	0.687	0.436	1.28e-25
Flna	2.74e-73	0.328951	0.287	0.039	5.13e-69
Rpl18a	5.36e-31	0.327615	0.58	0.316	1.01e-26
Rpl34	2.24e-36	0.32702	0.496	0.228	4.2e-32
Phlda1	1.25e-42	0.326103	0.289	0.074	2.34e-38
Rps15	5.97e-31	0.325882	0.609	0.348	1.12e-26
Rps13	1.17e-36	0.324636	0.54	0.257	2.2e-32
Arpc5	2.13e-43	0.32254	0.496	0.199	3.99e-39
Sem1	5.55e-35	0.322415	0.504	0.241	1.04e-30
Rpl9	1.45e-35	0.321688	0.536	0.255	2.71e-31
Rps20	7.95e-33	0.321048	0.629	0.364	1.49e-28
Hsp90ab1	3.35e-31	0.319956	0.956	0.875	6.28e-27
Ybx3	6.03e-38	0.319956	0.442	0.176	1.13e-33
Ier2	1.21e-32	0.319687	0.338	0.121	2.26e-28
Pabpc1	2.29e-28	0.319599	0.82	0.614	4.29e-24
Rps28	1.71e-33	0.318191	0.598	0.326	3.21e-29
Itm2b	4.78e-20	0.317611	0.696	0.497	8.95e-16
Rpl38	9.35e-30	0.317366	0.64	0.391	1.75e-25
Jun	1.12e-40	0.315771	0.836	0.514	2.1e-36
Rpl37a	6.03e-31	0.314611	0.593	0.322	1.13e-26
Litaf	6.98e-46	0.314035	0.378	0.117	1.31e-41
Rpl27	7.04e-38	0.313195	0.596	0.292	1.32e-33
Ifrd1	4.46e-23	0.313115	0.536	0.307	8.35e-19
Cldn4	8.51e-21	0.312953	0.302	0.137	1.59e-16
Rpl26	4.06e-30	0.312067	0.653	0.379	7.61e-26
Arl4c	1.45e-77	0.311422	0.271	0.031	2.72e-73
Actg1	7.84e-31	0.31078	0.54	0.277	1.47e-26
Psma7	3.41e-26	0.309816	0.573	0.335	6.38e-22
Rpl11	2.31e-24	0.309518	0.671	0.448	4.32e-20
Rrp1	4.38e-33	0.308176	0.471	0.216	8.2e-29
Lmna	7.76e-24	0.308007	0.42	0.213	1.45e-19
Rpl37	1.49e-32	0.307954	0.593	0.324	2.78e-28
Rpl10	3.53e-32	0.304952	0.478	0.221	6.62e-28
Sept11	3.99e-24	0.304921	0.367	0.172	7.47e-20
Rps29	1.49e-30	0.304474	0.576	0.315	2.78e-26
Hnrnpc	1.94e-30	0.304164	0.516	0.264	3.64e-26
Eef1b2	8.2e-31	0.303835	0.518	0.26	1.54e-26
Capns1	5.8e-35	0.302131	0.471	0.207	1.09e-30
Hmgb1	7.26e-35	0.301252	0.524	0.25	1.36e-30
Rpl8	2.63e-25	0.300474	0.658	0.42	4.93e-21
Rhob	5.79e-39	0.299775	0.451	0.176	1.08e-34
F2rl1	1.31e-59	0.297316	0.278	0.048	2.46e-55
Rpl22l1	2.36e-33	0.296735	0.458	0.203	4.42e-29
Itgav	1.37e-32	0.296421	0.442	0.196	2.57e-28
Rpl19	6.61e-33	0.292436	0.533	0.265	1.24e-28
Tspo	2.42e-35	0.290836	0.391	0.149	4.53e-31
Rplp2	1.72e-29	0.290062	0.607	0.345	3.22e-25
Col18a1	3.02e-21	0.288969	0.427	0.23	5.65e-17
Rpl12	7.1e-28	0.285119	0.527	0.281	1.33e-23
Calr	4.34e-20	0.28216	0.671	0.484	8.13e-16
Rps25	1.94e-26	0.282071	0.618	0.372	3.64e-22
Serpinh1	1.25e-41	0.281332	0.34	0.104	2.34e-37
Rps16	8.43e-39	0.280054	0.418	0.156	1.58e-34
Rpl22	3.14e-27	0.279678	0.573	0.322	5.88e-23
Ywhae	1.47e-24	0.278987	0.596	0.361	2.76e-20
Tnfrsf12a	1.03e-22	0.276877	0.553	0.321	1.94e-18
Col4a2	9.13e-25	0.27649	0.276	0.105	1.71e-20
Fkbp3	2.96e-34	0.275728	0.418	0.168	5.55e-30
Hnrnpa3	2.57e-22	0.275667	0.491	0.273	4.82e-18
Ywhaq	5.62e-46	0.274385	0.32	0.084	1.05e-41
Elob	2.79e-27	0.274199	0.478	0.242	5.23e-23
Cdc42	1.37e-26	0.274135	0.54	0.298	2.56e-22
Rack1	1.41e-22	0.27109	0.62	0.401	2.64e-18
Cnn3	2.01e-30	0.270608	0.344	0.133	3.77e-26
Dync1i2	4.54e-24	0.270272	0.46	0.239	8.5e-20
Ptpn13	4.94e-34	0.269923	0.298	0.095	9.25e-30
Psme1	6.43e-51	0.268806	0.309	0.071	1.2e-46
Crip1	3.57e-59	0.268246	0.253	0.038	6.68e-55
Chd4	1.29e-17	0.266863	0.644	0.45	2.42e-13
Rpl23	8.89e-23	0.266167	0.582	0.358	1.66e-18
Spns2	3.69e-38	0.264462	0.276	0.075	6.92e-34
Adgrg1	1.46e-29	0.26432	0.433	0.191	2.73e-25
Ier5	1.24e-34	0.264153	0.289	0.087	2.32e-30
Sept7	3.63e-19	0.263464	0.413	0.225	6.81e-15
Rps10	1.41e-23	0.26305	0.571	0.341	2.65e-19
Rps11	3.55e-32	0.263014	0.498	0.228	6.65e-28
Rhoa	2.9e-25	0.262987	0.458	0.231	5.43e-21
Pdxk	9.27e-24	0.261746	0.284	0.112	1.74e-19
Hnrnpa2b1	1.03e-14	0.260975	0.689	0.538	1.92e-10
Hsbp1	8.81e-29	0.260919	0.393	0.169	1.65e-24
Rps23	2.47e-29	0.257621	0.458	0.213	4.63e-25
Fosl2	3.61e-34	0.255113	0.3	0.095	6.76e-30
Myl12b	3.72e-28	0.255101	0.38	0.163	6.97e-24
Palld	3.8e-17	0.254313	0.358	0.189	7.12e-13
Hnrnpk	9.26e-28	0.253986	0.487	0.246	1.73e-23
Ddx5	2.23e-17	0.253788	0.742	0.56	4.18e-13
Tpt1	1.42e-13	0.253229	0.707	0.558	2.66e-09
Cst3	1.45e-21	0.250358	0.402	0.202	2.71e-17
Rpl31	3.7e-20	0.249938	0.458	0.264	6.93e-16
Selenow	1.54e-33	0.247516	0.311	0.102	2.88e-29
Hmg20b	5.26e-23	0.246632	0.371	0.174	9.84e-19
Pdia3	4.75e-18	0.246609	0.607	0.408	8.9e-14
Eif6	6.15e-19	0.244586	0.469	0.269	1.15e-14
Set	4.17e-22	0.244276	0.484	0.263	7.8e-18
Nr2f2	4.64e-13	0.243566	0.293	0.162	8.7e-09
Hspa5	2.17e-08	0.242659	0.798	0.709	0.000407447
Ppib	3.22e-25	0.241701	0.351	0.15	6.03e-21
B230219D22Rik	8.52e-24	0.241532	0.358	0.161	1.6e-19
Btf3	1.98e-35	0.240049	0.396	0.146	3.71e-31
Ubb	6.37e-19	0.238752	0.838	0.655	1.19e-14
Sema3c	1.91e-23	0.236331	0.336	0.146	3.58e-19
Icam1	1.28e-26	0.235737	0.256	0.086	2.4e-22
Prdx2	3.96e-25	0.234311	0.38	0.171	7.41e-21
Myof	3.39e-21	0.233346	0.402	0.203	6.34e-17
Atpif1	3.41e-15	0.232868	0.74	0.569	6.38e-11
Csnk1a1	2.17e-16	0.232617	0.54	0.357	4.06e-12
Pdia6	1.95e-20	0.230858	0.382	0.192	3.65e-16
Rps17	4.31e-19	0.230855	0.462	0.261	8.07e-15
Ptms	8.1e-14	0.230506	0.604	0.445	1.52e-09
Rpsa	1.12e-16	0.230407	0.671	0.47	2.09e-12
Dnajc8	2.67e-24	0.229937	0.336	0.143	5e-20
1810037I17Rik	1.41e-33	0.229246	0.32	0.106	2.65e-29
Cd81	1.59e-13	0.229074	0.336	0.19	2.98e-09
Ssb	3.36e-17	0.228716	0.491	0.295	6.29e-13
Sh3bgrl	8.17e-37	0.228454	0.267	0.07	1.53e-32
Psme2	1.45e-37	0.226881	0.253	0.063	2.72e-33
Uqcc2	2.73e-27	0.226745	0.282	0.1	5.12e-23
Ywhah	1.26e-21	0.225711	0.362	0.173	2.36e-17
Pdgfb	2.96e-33	0.225687	0.256	0.072	5.55e-29
Hnrnpab	5.61e-16	0.224799	0.498	0.312	1.05e-11
Edf1	4.83e-16	0.223457	0.416	0.238	9.04e-12
Sfr1	5.71e-19	0.223214	0.349	0.173	1.07e-14
Rps21	1.94e-16	0.223035	0.564	0.373	3.63e-12
Mrpl33	3.41e-23	0.22264	0.409	0.199	6.39e-19
Prr13	1.99e-24	0.222291	0.287	0.11	3.73e-20
Tceal9	6.65e-24	0.220209	0.327	0.138	1.25e-19
Tmem50a	3.45e-28	0.219736	0.271	0.09	6.46e-24
Ranbp1	9.74e-32	0.219183	0.26	0.077	1.83e-27
Eloc	1.68e-24	0.218772	0.291	0.113	3.14e-20
Cxcl16	2.73e-27	0.217324	0.273	0.094	5.12e-23
H2-Ab1	2.43e-13	0.216861	0.276	0.142	4.56e-09
Ccdc50	6.48e-17	0.215756	0.462	0.277	1.21e-12
Atox1	2e-14	0.215474	0.511	0.338	3.74e-10
Dstn	1.42e-15	0.214651	0.378	0.212	2.66e-11
Rpl36a	1.09e-18	0.213804	0.396	0.207	2.04e-14
Cbx1	2.98e-18	0.213702	0.342	0.17	5.59e-14
Tmed10	7.8e-32	0.213649	0.351	0.128	1.46e-27
Rhoc	7.92e-22	0.212654	0.378	0.181	1.48e-17
Smarca5	1.16e-14	0.212514	0.38	0.219	2.16e-10
Sec61b	4.12e-35	0.212466	0.304	0.093	7.71e-31
Sept2	9.26e-31	0.212273	0.307	0.105	1.74e-26
Chmp4b	2.63e-15	0.211134	0.351	0.191	4.92e-11
Eef1g	7.54e-14	0.210463	0.442	0.277	1.41e-09
Snrpg	1.39e-38	0.209668	0.273	0.071	2.61e-34
Rpl30	4.03e-20	0.209384	0.409	0.212	7.55e-16
Gnb2	8.26e-16	0.2076	0.336	0.178	1.55e-11
Rpl27a	1.11e-19	0.207354	0.382	0.195	2.09e-15
Cd63	2.31e-12	0.206918	0.847	0.772	4.33e-08
Ywhab	8.98e-16	0.206772	0.458	0.279	1.68e-11
Pax8	1.25e-23	0.206344	0.329	0.137	2.34e-19
Anp32a	2.25e-12	0.20583	0.404	0.253	4.21e-08
Agrn	6.03e-23	0.204705	0.324	0.136	1.13e-18
Cfdp1	8.28e-19	0.203214	0.378	0.195	1.55e-14
Serbp1	1.92e-14	0.202895	0.696	0.512	3.6e-10
Fam213a	4.08e-07	0.201527	0.389	0.289	0.00764187
Csrnp1	1.47e-30	0.201061	0.251	0.074	2.76e-26
Cdk4	5.53e-26	0.200593	0.253	0.085	1.04e-21
Nfe2l1	7.76e-17	0.200008	0.307	0.15	1.45e-12
Map4k4	3.58e-30	0.199949	0.256	0.077	6.7e-26
Id2	1.34e-09	0.198917	0.533	0.4	2.52e-05
Picalm	3.61e-11	0.198718	0.509	0.35	6.76e-07
Apoe	1.19e-18	0.197662	0.389	0.198	2.24e-14
Eif3f	9.25e-16	0.197038	0.329	0.172	1.73e-11
Acin1	8.89e-10	0.196964	0.476	0.347	1.66e-05
Psmb2	8.66e-23	0.196845	0.253	0.093	1.62e-18
Nol7	7.38e-12	0.196536	0.44	0.288	1.38e-07
Gas5	1.19e-10	0.196523	0.513	0.367	2.23e-06
Pdap1	9.43e-14	0.195542	0.418	0.257	1.77e-09
Ivns1abp	1.82e-08	0.194788	0.469	0.359	0.000341452
Nedd8	2e-16	0.194685	0.378	0.204	3.75e-12
Naca	2.62e-15	0.194429	0.427	0.251	4.91e-11
Zfand5	9.3e-12	0.194027	0.444	0.289	1.74e-07
Swi5	8.17e-16	0.193559	0.36	0.191	1.53e-11
Snrpb	3.19e-16	0.193415	0.282	0.134	5.98e-12
Arf5	3.03e-18	0.193037	0.32	0.151	5.67e-14
Trib1	4.1e-18	0.193021	0.276	0.12	7.69e-14
Rpl7a	8.08e-17	0.192643	0.391	0.212	1.51e-12
Hnrnpu	7.81e-09	0.192592	0.584	0.459	0.00014639
Cd151	2.86e-25	0.192088	0.262	0.092	5.35e-21
Psmd8	4.08e-18	0.191365	0.28	0.126	7.65e-14
Abracl	9.77e-20	0.190817	0.267	0.11	1.83e-15
Pmaip1	4.63e-17	0.189314	0.284	0.129	8.68e-13
Lamb1	3.94e-20	0.188762	0.269	0.11	7.38e-16
Mtpn	1.98e-16	0.188615	0.298	0.144	3.71e-12
Arpc3	1.68e-17	0.18755	0.298	0.139	3.15e-13
Reep5	1.46e-13	0.187339	0.271	0.136	2.74e-09
Anp32b	2.86e-10	0.187332	0.42	0.287	5.36e-06
Plau	1.34e-08	0.186039	0.436	0.309	0.000251133
Ndufa7	8.1e-14	0.185508	0.34	0.189	1.52e-09
Rbpms	1.52e-11	0.183584	0.351	0.213	2.84e-07
Sf3b1	3.81e-11	0.183395	0.418	0.271	7.14e-07
Rpl10a	1.02e-17	0.183242	0.38	0.198	1.91e-13
Gng12	3.17e-13	0.182631	0.416	0.253	5.93e-09
Hnrnpa0	2.12e-14	0.182617	0.356	0.198	3.97e-10
Eif5a	3.01e-11	0.182553	0.462	0.315	5.63e-07
Tmem258	7.54e-26	0.182463	0.271	0.094	1.41e-21
Fkbp1a	3.55e-18	0.181799	0.342	0.168	6.66e-14
Rpl36	8.83e-14	0.180057	0.509	0.334	1.65e-09
Crim1	4.16e-10	0.17981	0.298	0.176	7.8e-06
Slc25a4	3.38e-15	0.179714	0.536	0.338	6.34e-11
Psmb1	1.51e-12	0.178849	0.373	0.22	2.82e-08
Ybx1	2.19e-17	0.178244	0.864	0.698	4.1e-13
Rps27l	2.98e-11	0.17755	0.487	0.331	5.59e-07
Gabarap	1.06e-11	0.177195	0.522	0.365	1.99e-07
Cetn3	7.95e-19	0.177001	0.26	0.108	1.49e-14
Sash1	2.33e-12	0.17692	0.296	0.161	4.37e-08
Snrpd3	1e-14	0.17664	0.32	0.168	1.88e-10
Mir703	1.17e-19	0.175574	0.362	0.174	2.2e-15
Tbca	2.81e-15	0.175502	0.316	0.162	5.27e-11
Pfdn5	2.76e-11	0.174526	0.362	0.223	5.17e-07
Srsf3	4.26e-12	0.1731	0.311	0.173	7.97e-08
Snw1	4.07e-10	0.172919	0.296	0.176	7.63e-06
Ik	1.33e-11	0.172642	0.362	0.219	2.48e-07
Tmem252	0.00315412	0.17216	0.413	0.379	1
Hprt	6.07e-18	0.172007	0.267	0.115	1.14e-13
Nop58	9.88e-14	0.171803	0.44	0.267	1.85e-09
Mrpl52	1.01e-15	0.171061	0.309	0.153	1.9e-11
Dek	1.09e-11	0.170971	0.342	0.202	2.05e-07
Rad21	3.56e-12	0.170797	0.258	0.134	6.67e-08
Prdx1	6.17e-11	0.170158	0.709	0.59	1.16e-06
Ctnna1	1.04e-07	0.169666	0.4	0.285	0.00193992
Mrfap1	5.47e-18	0.169536	0.302	0.139	1.03e-13
Rexo2	4.51e-13	0.169177	0.329	0.184	8.46e-09
H3f3a	1.38e-24	0.168976	0.26	0.091	2.59e-20
Minos1	1.32e-09	0.167948	0.524	0.375	2.47e-05
Ran	1.19e-17	0.167738	0.3	0.138	2.22e-13
Nop10	8.4e-11	0.165505	0.367	0.229	1.57e-06
Tuba1c	1.68e-12	0.165336	0.356	0.204	3.15e-08
Pa2g4	5.35e-12	0.165292	0.313	0.176	1e-07
Arf4	4.69e-11	0.164543	0.258	0.139	8.78e-07
Ctsd	2.76e-08	0.16434	0.462	0.336	0.000517664
Manf	1.82e-14	0.164157	0.26	0.123	3.4e-10
Rbx1	5.54e-16	0.163153	0.309	0.151	1.04e-11
Cfap36	1.92e-08	0.161495	0.307	0.197	0.000360464
Rpl35a	1.15e-13	0.161022	0.378	0.217	2.16e-09
Eif3c	1.91e-09	0.160726	0.613	0.463	3.57e-05
Atp6v0e	2.02e-14	0.159927	0.251	0.118	3.79e-10
Cct4	1.85e-09	0.157952	0.273	0.159	3.47e-05
Arglu1	1.54e-09	0.157212	0.451	0.308	2.89e-05
Hsp90b1	4.75e-08	0.156885	0.756	0.63	0.000889811
Spcs1	2.37e-17	0.156819	0.273	0.12	4.44e-13
Ptp4a2	2.08e-10	0.156183	0.318	0.189	3.9e-06
Rps6	3.18e-16	0.155633	0.291	0.138	5.95e-12
Cyba	4.78e-06	0.155532	0.571	0.491	0.0896367
Dad1	4.6e-11	0.155458	0.273	0.149	8.61e-07
Eif1a	2.47e-10	0.15455	0.307	0.182	4.63e-06
Cd2ap	2.45e-10	0.154113	0.636	0.46	4.6e-06
Pdcd6ip	2.28e-10	0.153909	0.32	0.193	4.28e-06
Gnb1	3.45e-12	0.153554	0.269	0.142	6.47e-08
Chmp2a	1.77e-08	0.153329	0.267	0.162	0.000332243
Taf10	2.26e-09	0.153134	0.264	0.153	4.23e-05
Cdc37	5.69e-09	0.152391	0.293	0.179	0.000106682
Dynlrb1	7.44e-13	0.150753	0.253	0.125	1.39e-08
Rbbp7	3.15e-12	0.15019	0.273	0.144	5.9e-08
Sh3glb1	5.93e-08	0.150072	0.34	0.228	0.00111015
Capzb	7.53e-10	0.149841	0.267	0.153	1.41e-05
Cfl2	2.57e-09	0.149538	0.318	0.196	4.81e-05
Sfpq	5.6e-08	0.149363	0.458	0.328	0.00104932
Tgm2	4.51e-08	0.149092	0.324	0.212	0.000844965
Gstm1	2.8e-06	0.148326	0.391	0.292	0.0524833
Serf2	3.01e-11	0.147678	0.309	0.176	5.64e-07
Sec11a	7.39e-11	0.147376	0.251	0.133	1.38e-06
Gadd45g	3.87e-06	0.146875	0.387	0.284	0.0724641
Hnrnpm	5.01e-09	0.146742	0.391	0.259	9.39e-05
Selenok	2.32e-10	0.146458	0.287	0.165	4.35e-06
Eif3k	2.94e-10	0.146077	0.256	0.141	5.52e-06
Dbi	1.26e-07	0.145526	0.816	0.75	0.002363
Plscr2	5.3e-07	0.145224	0.498	0.384	0.00993664
Ppp1r15a	1.83e-12	0.144232	0.267	0.136	3.43e-08
Pcbp2	5.91e-07	0.143978	0.371	0.265	0.0110773
Rpl36al	4.34e-11	0.143362	0.336	0.197	8.13e-07
Cox6b1	4.73e-08	0.143277	0.582	0.45	0.000886217
Npc2	3.62e-11	0.142186	0.309	0.174	6.78e-07
Banf1	2.98e-11	0.142088	0.258	0.136	5.58e-07
1110004F10Rik	8.76e-12	0.141889	0.278	0.148	1.64e-07
Fus	6.73e-08	0.141871	0.364	0.246	0.00125997
Oaz1	1.57e-10	0.141865	0.436	0.28	2.94e-06
Psmb3	4.23e-10	0.141001	0.336	0.204	7.92e-06
Lpp	1.02e-11	0.140365	0.267	0.139	1.91e-07
Gsk3b	8.51e-10	0.140167	0.256	0.142	1.59e-05
Cib1	4.92e-07	0.140046	0.338	0.233	0.00922323
Dusp1	2.98e-10	0.139422	0.282	0.161	5.58e-06
Canx	3.68e-06	0.138532	0.653	0.543	0.0689429
Rpl29	9e-13	0.13847	0.251	0.124	1.69e-08
Tbrg1	2.84e-11	0.137844	0.304	0.171	5.32e-07
Cct5	4.09e-09	0.137502	0.284	0.169	7.66e-05
Psma2	2.51e-10	0.137009	0.331	0.198	4.71e-06
G3bp2	6.3e-10	0.135879	0.284	0.164	1.18e-05
Rac1	6.92e-09	0.135397	0.309	0.189	0.000129566
Syne2	0.000118942	0.135183	0.642	0.563	1
Nme1	4.34e-07	0.134126	0.456	0.348	0.00813197
Hp1bp3	4.67e-08	0.133985	0.307	0.198	0.000874758
Psmb6	2.3e-08	0.132956	0.316	0.202	0.000431071
Ubl5	1.97e-09	0.13268	0.313	0.188	3.68e-05
S100a1	2.92e-10	0.132627	0.322	0.191	5.47e-06
Fau	1.18e-08	0.1322	0.449	0.314	0.000221384
Rpl35	9.48e-13	0.131456	0.276	0.141	1.78e-08
Cxxc5	1.5e-05	0.129774	0.262	0.181	0.280452
Clta	1.86e-09	0.129573	0.411	0.269	3.48e-05
Selenof	2.46e-09	0.129222	0.322	0.197	4.61e-05
Eny2	4.58e-07	0.129215	0.293	0.192	0.00858674
Eif4a1	2.92e-09	0.128978	0.304	0.185	5.48e-05
Wwc1	1.67e-06	0.128904	0.311	0.212	0.031322
Ube2r2	8.02e-09	0.12731	0.3	0.182	0.00015025
Krt8	7.1e-05	0.12676	0.529	0.445	1
Ywhaz	4.74e-06	0.12532	0.513	0.399	0.0887354
Lgals3	2.04e-08	0.125051	0.327	0.206	0.000382735
Vdac2	2.2e-08	0.124849	0.28	0.168	0.000411366
Eef1d	7.8e-08	0.124014	0.309	0.197	0.00146038
Dctn3	2.07e-12	0.123551	0.258	0.129	3.87e-08
Cct6a	2.35e-05	0.123112	0.424	0.334	0.439727
Nap1l1	2.36e-07	0.122657	0.478	0.35	0.00442615
Txn1	1.07e-05	0.122065	0.633	0.526	0.199728
Psma1	5.54e-08	0.121895	0.271	0.165	0.00103877
Cacybp	3.26e-08	0.120958	0.262	0.157	0.000611124
Ndufa6	2.24e-05	0.120757	0.478	0.38	0.419354
Etf1	3.5e-09	0.120348	0.3	0.18	6.57e-05
Pfdn1	1.37e-07	0.119903	0.318	0.209	0.00256431
Ccnl1	7.85e-06	0.119834	0.358	0.256	0.146979
Ppfibp1	1.92e-07	0.119574	0.298	0.191	0.00359207
Sf3b2	3.1e-06	0.119241	0.387	0.279	0.0581289
Tm9sf3	2.4e-05	0.117923	0.344	0.253	0.449377
Stx7	5.13e-06	0.116995	0.262	0.176	0.0961944
Krt20	0.000311088	0.116659	0.32	0.238	1
Atp6v1f	4.31e-06	0.116216	0.336	0.237	0.0807736
Rsl1d1	8.76e-05	0.11495	0.304	0.227	1
Drap1	3.28e-08	0.114064	0.273	0.166	0.000614954
Ubxn1	1.35e-05	0.112616	0.362	0.267	0.253435
Afdn	2.52e-06	0.1124	0.298	0.201	0.0471284
Cnbp	4.87e-06	0.112229	0.358	0.258	0.0913065
Actn4	0.0101152	0.112075	0.358	0.308	1
Tmem59	1.19e-06	0.111735	0.28	0.182	0.0223358
Purb	0.000118204	0.111082	0.28	0.202	1
Eif2s2	1.05e-06	0.109876	0.5	0.37	0.0196062
Matr3	0.000972738	0.109197	0.338	0.266	1
Bzw1	6.45e-06	0.10806	0.307	0.213	0.120924
Psma4	5.46e-05	0.107345	0.32	0.236	1
Ptbp3	4.2e-05	0.106774	0.256	0.176	0.786948
Hnrnpdl	2.11e-05	0.106621	0.253	0.171	0.395806
Rab11a	4.93e-06	0.106168	0.267	0.177	0.0923364
Hnrnpd	0.000149293	0.105192	0.313	0.234	1
Ube2d3	0.000760346	0.105071	0.333	0.264	1
Ktn1	2.73e-05	0.104695	0.34	0.249	0.51131
1700016C15Rik	0.00021614	0.10385	0.291	0.217	1
Atrx	0.00675369	0.103297	0.418	0.361	1
Tpd52	6.11e-05	0.1032	0.349	0.261	1
Smdt1	5.34e-05	0.102422	0.327	0.235	0.99967
Ube2b	6.53e-05	0.0990027	0.302	0.218	1
Rab14	0.000878567	0.0988813	0.293	0.227	1
Ssr3	3.7e-05	0.0983194	0.258	0.177	0.692806
Aprt	8.44e-05	0.0981426	0.304	0.22	1
Skp1a	3.21e-07	0.0975849	0.416	0.291	0.00601846
Msi2	5.53e-05	0.0974253	0.278	0.197	1
Mtdh	0.00115088	0.0971982	0.42	0.345	1
Prpf40a	0.000163439	0.0966006	0.307	0.227	1
Zc3h15	0.000508613	0.0965273	0.324	0.25	1
Pafah1b1	0.000126513	0.096234	0.402	0.314	1
Pak2	4.67e-05	0.095467	0.273	0.192	0.875597
Srrm1	0.000357844	0.0953671	0.38	0.3	1
Atxn7l3b	0.000474521	0.0951101	0.298	0.223	1
Aldoa	0.000119363	0.0950888	0.436	0.345	1
Psmd4	0.000105869	0.0935202	0.316	0.231	1
Tra2b	0.000333527	0.0922671	0.264	0.192	1
Eif5b	0.0294815	0.0921185	0.54	0.492	1
Prkar1a	3.53e-05	0.0913729	0.282	0.198	0.66044
Xrn2	0.000255004	0.0907837	0.253	0.181	1
Ddx39b	3.07e-05	0.0907228	0.276	0.193	0.574272
Cystm1	0.00100274	0.0902696	0.431	0.352	1
AC121965.1	6.71e-06	0.0901726	0.356	0.253	0.125783
Tmco1	0.000755151	0.0901517	0.271	0.205	1
Rsrc2	0.00672725	0.08954	0.273	0.22	1
Smc6	0.00416921	0.0894853	0.253	0.202	1
Cct2	0.00280828	0.0894082	0.302	0.24	1
Cast	0.000142405	0.0885243	0.267	0.19	1
Smim10l1	0.000121599	0.0882631	0.256	0.181	1
Zfp91	0.0707624	0.0879807	0.358	0.322	1
Rab2a	0.000223742	0.0870008	0.293	0.215	1
Tardbp	0.000193884	0.0857154	0.253	0.181	1
Bag1	0.000383107	0.0851446	0.371	0.284	1
Ctnnb1	7.6e-05	0.0850493	0.342	0.253	1
Tln1	0.0157296	0.084611	0.271	0.225	1
Psmb4	3.05e-05	0.0829513	0.36	0.263	0.570679
Arf1	0.000399972	0.0828836	0.278	0.205	1
Hdgf	0.00335604	0.0828262	0.42	0.343	1
Rock2	0.00256898	0.0817221	0.473	0.389	1
Luc7l3	0.00315881	0.0814008	0.353	0.285	1
Syncrip	0.000336781	0.0812211	0.258	0.186	1
Eef2	0.00158019	0.0810517	0.576	0.5	1
Cebpb	0.0018411	0.0810107	0.418	0.335	1
Rtn3	0.00422811	0.0802055	0.313	0.254	1
Map1lc3b	2.74e-05	0.0799321	0.264	0.179	0.513057
Itgb6	0.0171217	0.0793196	0.333	0.289	1
Sh3d19	0.000744762	0.0793034	0.318	0.241	1
Ddx46	0.0389483	0.0789297	0.271	0.235	1
Bsg	0.00169916	0.0781835	0.347	0.279	1
Smc1a	0.00291629	0.0774564	0.282	0.22	1
Ppp2ca	0.00209321	0.0767142	0.273	0.21	1
Timm13	0.00313073	0.0760307	0.331	0.266	1
Cdh16	0.0145256	0.0759315	0.487	0.439	1
Psmc3	0.000170038	0.0757314	0.298	0.215	1
Romo1	2.27e-05	0.0752174	0.304	0.211	0.425653
Txnl1	0.00053573	0.0750508	0.262	0.191	1
Cldn2	0.0180622	0.074981	0.409	0.359	1
Tax1bp1	0.0499491	0.0746706	0.622	0.59	1
Ahnak	0.000204924	0.073861	0.34	0.253	1
Ndufb8	0.000904734	0.0731789	0.378	0.301	1
Ndufa11	2.33e-05	0.0727338	0.276	0.186	0.436929
Pkn2	0.0491583	0.0718858	0.296	0.259	1
Ncl	0.00799176	0.0717336	0.796	0.71	1
Ptges3	0.00724328	0.0716244	0.276	0.221	1
Hint1	0.0204323	0.0714963	0.52	0.47	1
Nucks1	0.0282572	0.071206	0.327	0.281	1
Clk1	0.000111252	0.0708487	0.262	0.182	1
Top1	0.0185284	0.069636	0.393	0.341	1
Fubp1	0.0972644	0.0695425	0.271	0.242	1
Metap2	0.0207816	0.0695016	0.298	0.249	1
Rnh1	0.0193065	0.0693761	0.271	0.225	1
Aes	0.00723099	0.0692019	0.296	0.24	1
Ubxn4	0.0325193	0.0690954	0.44	0.389	1
Cops9	0.00111745	0.068985	0.271	0.203	1
Cct8	0.00651827	0.0686945	0.258	0.204	1
Ndufc2	0.0013497	0.06784	0.331	0.258	1
Pttg1ip	0.00422751	0.0678061	0.251	0.192	1
Snrnp70	2.54e-05	0.0675592	0.393	0.283	0.476241
Erdr1	4.07e-05	0.0671679	0.431	0.322	0.761931
Ppig	0.249561	0.0656566	0.293	0.276	1
Arhgdia	0.00597006	0.0653822	0.264	0.207	1
Fkbp4	0.00554233	0.0653671	0.26	0.203	1
Psmd7	0.0219948	0.0642964	0.273	0.227	1
P4hb	0.0289206	0.0641718	0.309	0.264	1
Wasl	0.270152	0.0623379	0.273	0.258	1
Cox17	0.00369308	0.0620149	0.329	0.262	1
Jak1	0.056404	0.061756	0.258	0.217	1
Car2	0.295238	0.0612163	0.487	0.478	1
Pebp1	0.00303112	0.0607815	0.378	0.308	1
U2surp	0.00868254	0.0586496	0.322	0.264	1
Ldha	0.0865536	0.0578625	0.469	0.438	1
Bod1l	0.172564	0.0566433	0.262	0.234	1
Snx6	0.039371	0.0556509	0.313	0.269	1
Nfe2l2	0.000200492	0.0554357	0.271	0.191	1
Kif5b	0.205028	0.0550087	0.411	0.387	1
Rrbp1	0.073616	0.0547012	0.573	0.52	1
D8Ertd738e	0.00763398	0.0544994	0.251	0.195	1
Csde1	0.0244785	0.0544019	0.289	0.241	1
Ndufb6	0.00067512	0.0542745	0.367	0.281	1
Pcm1	0.0191804	0.0536525	0.271	0.22	1
Mbnl2	0.00185886	0.0527364	0.287	0.218	1
Fxr1	0.00163814	0.0505218	0.338	0.261	1
Sltm	0.0580781	0.0504033	0.316	0.275	1
Zranb2	0.0303508	0.0493091	0.282	0.236	1
Senp6	0.101174	0.0479998	0.309	0.277	1
Tmem256	0.0212651	0.0457387	0.267	0.218	1
Pnisr	0.0329688	0.0451832	0.362	0.307	1
Thoc7	0.0416872	0.0450735	0.28	0.235	1
Pbrm1	0.0626682	0.0428511	0.256	0.216	1
Mpc2	0.00523071	0.0419574	0.491	0.409	1
Atp5d	0.0989946	0.0399599	0.484	0.434	1
Eif4g2	0.16659	0.0397171	0.429	0.402	1
Pcbp1	0.192452	0.039282	0.287	0.26	1
Tpr	0.075842	0.0391004	0.52	0.473	1
Hnrnpul2	0.530723	0.0389056	0.267	0.259	1
Ndufa3	0.0393558	0.0377983	0.413	0.356	1
Cox8a	0.010879	0.036423	0.44	0.364	1
Rab7	0.0958732	0.0362828	0.289	0.251	1
Ube2k	0.145241	0.0358866	0.251	0.223	1
Psmc1	0.0690597	0.0349756	0.316	0.272	1
Rbm39	0.0340483	0.0346288	0.538	0.478	1
Srsf11	0.0857491	0.0346206	0.336	0.296	1
Uqcrb	0.0667502	0.0344288	0.413	0.361	1
Ndufab1	0.0477322	0.0335904	0.296	0.251	1
Atp5g1	0.0244155	0.0322336	0.342	0.288	1
Cox7c	0.0131527	0.0315169	0.667	0.58	1
Ndufb3	0.282033	0.0307605	0.293	0.268	1
Fkbp2	0.222196	0.0297737	0.264	0.238	1
Atp5j	0.0894737	0.0289643	0.402	0.358	1
Atp5o	0.110241	0.0285206	0.407	0.364	1
Ndufb2	0.128326	0.0272796	0.287	0.251	1
Srsf5	0.137984	0.0240067	0.282	0.246	1
Ubc	0.00185538	0.0239432	0.764	0.699	1
Tmbim4	0.104215	0.0238092	0.356	0.316	1
Usmg5	0.0992355	0.0236193	0.38	0.332	1
Atp6v0b	0.189894	0.0229204	0.418	0.382	1
Cox6c	0.0188828	0.0226753	0.736	0.653	1
Gspt1	0.894041	0.0212627	0.284	0.288	1
Bclaf1	0.315394	0.0209646	0.307	0.284	1
Slk	0.637332	0.0199216	0.247	0.264	1
Pnn	0.181435	0.0192568	0.389	0.351	1
Atp5h	0.109493	0.0186612	0.393	0.343	1
Prnp	0.414271	0.0180704	0.253	0.235	1
Rock1	0.707873	0.0171983	0.293	0.289	1
Atp5e	0.221408	0.0170852	0.482	0.44	1
St13	0.240436	0.0168714	0.524	0.492	1
Marc2	0.433982	0.0156163	0.324	0.309	1
Errfi1	0.227669	0.0153017	0.556	0.52	1
Camk2n1	0.435403	0.015029	0.249	0.274	1
Tmem30a	0.435322	0.0146094	0.253	0.235	1
Son	0.509831	0.013961	0.402	0.386	1
Cox5a	0.268437	0.0137742	0.46	0.432	1
Cux1	0.660875	0.0126099	0.278	0.269	1
Cox4i1	0.38138	0.0119913	0.736	0.719	1
Ndufb7	0.447134	0.0117613	0.28	0.261	1
Dst	0.779238	0.011381	0.251	0.258	1
Rab1a	0.489071	0.0109061	0.278	0.261	1
BC005537	0.976438	0.0103021	0.331	0.334	1
Calm3	0.230634	0.010241	0.258	0.229	1
Igf1r	0.897182	0.00983252	0.282	0.291	1
Ddx21	0.330154	0.00855488	0.324	0.298	1
Ndufb4	0.335004	0.00835925	0.264	0.24	1
Ndufa4	0.0430963	0.007226	0.627	0.548	1
Mif	0.257087	0.0062276	0.367	0.337	1
Eif4g1	0.706546	0.00614135	0.371	0.36	1
Macf1	0.773993	0.00402191	0.256	0.249	1
Lamp1	0.352623	0.00397827	0.558	0.525	1
Luc7l2	0.979785	0.0025982	0.309	0.312	1
Phf3	0.547254	0.00223285	0.269	0.255	1
Abcf1	0.91716	0.00108558	0.269	0.271	1
Brd2	0.339789	0.000724693	0.262	0.238	1
Ddx3x	0.386545	3.23e-05	0.34	0.314	1
Cltc	0.634122	-0.000925904	0.273	0.286	1
Hspa4	0.757381	-0.0012895	0.302	0.294	1
Ndufa1	0.67101	-0.00253081	0.28	0.27	1
Ccar1	0.809735	-0.00320624	0.344	0.344	1
Akap9	0.293947	-0.00375705	0.391	0.425	1
Ddah1	0.557071	-0.00729835	0.244	0.258	1
Dhcr24	0.829267	-0.00827439	0.284	0.292	1
Adss	0.672648	-0.00864703	0.258	0.266	1
Tcf25	0.720339	-0.00902739	0.358	0.36	1
Sat1	0.958649	-0.0100424	0.411	0.405	1
Mdh2	0.993105	-0.010583	0.34	0.338	1
Ndufb9	0.761323	-0.0110617	0.367	0.35	1
Dnaja2	0.51542	-0.0112701	0.253	0.271	1
Cox7b	0.764382	-0.0118612	0.391	0.392	1
Park7	0.690192	-0.0122	0.422	0.437	1
Ak2	0.694269	-0.0122766	0.253	0.258	1
Ash1l	0.553039	-0.0127466	0.253	0.266	1
Kif1b	0.322912	-0.0130159	0.236	0.259	1
Rbm25	0.715651	-0.0131604	0.533	0.503	1
Mcl1	0.268966	-0.0142898	0.293	0.328	1
Immt	0.976962	-0.014645	0.296	0.294	1
Ndufa12	0.859319	-0.0162992	0.284	0.278	1
Prpf38b	0.41982	-0.0184156	0.382	0.402	1
Ezr	0.296299	-0.0195807	0.627	0.572	1
Arpp19	0.503709	-0.0202357	0.316	0.329	1
Dnaja1	0.209664	-0.0213257	0.5	0.45	1
Serinc1	0.984484	-0.0219908	0.253	0.251	1
2010107E04Rik	0.995644	-0.0220317	0.422	0.414	1
Ncor1	0.159454	-0.0245416	0.378	0.422	1
Prrc2c	0.77897	-0.0248014	0.507	0.5	1
Myo6	0.0771292	-0.024932	0.422	0.479	1
Kmt5a	0.719361	-0.026847	0.249	0.253	1
Glul	0.16737	-0.0269116	0.247	0.279	1
Hsp90aa1	0.0112597	-0.0274336	0.796	0.711	1
Srsf2	0.670323	-0.0279318	0.307	0.314	1
Tkt	0.26051	-0.0283558	0.309	0.338	1
Ndufa2	0.550851	-0.0291073	0.447	0.407	1
Hdlbp	0.101961	-0.0313365	0.242	0.279	1
Slc25a5	0.746408	-0.0320797	0.522	0.514	1
Wapl	0.142161	-0.0325065	0.222	0.257	1
Cdk11b	0.258289	-0.0327867	0.322	0.346	1
C130074G19Rik	0.141534	-0.0338215	0.291	0.329	1
Acadl	0.269567	-0.0345287	0.32	0.347	1
Wwp1	0.143378	-0.0355629	0.258	0.29	1
Ndufs6	0.290965	-0.0378092	0.233	0.256	1
Txndc17	0.482923	-0.0394602	0.344	0.353	1
Sdhb	0.32019	-0.0402035	0.269	0.291	1
Lap3	0.232773	-0.0415431	0.262	0.286	1
Atp5k	0.58602	-0.0423966	0.329	0.328	1
Lamp2	0.156275	-0.0425148	0.478	0.51	1
Nceh1	0.0495125	-0.0434893	0.244	0.29	1
Ndufb10	0.228021	-0.0435028	0.238	0.263	1
Eprs	0.0272187	-0.0438095	0.249	0.301	1
Uqcrh	0.208916	-0.0449796	0.304	0.331	1
Ndufc1	0.811167	-0.0450879	0.358	0.353	1
Ndufa13	0.247506	-0.0451218	0.367	0.388	1
Tpi1	0.217766	-0.0461729	0.324	0.35	1
Pnpla8	0.0194517	-0.0463167	0.207	0.262	1
Vcp	0.133475	-0.0487521	0.331	0.366	1
Cox5b	0.610865	-0.050808	0.496	0.486	1
Mlec	0.0128409	-0.0510998	0.289	0.353	1
Atp2b1	0.0989387	-0.0514477	0.302	0.336	1
Atp6v1a	0.0906814	-0.0531231	0.278	0.315	1
Nktr	0.0366725	-0.0534866	0.227	0.276	1
Cyc1	0.0121749	-0.0547997	0.209	0.269	1
Amn	0.00714047	-0.0559428	0.191	0.253	1
Chchd2	0.583275	-0.0578482	0.696	0.667	1
Golgb1	0.00702887	-0.0602077	0.309	0.378	1
Atp5b	0.31077	-0.0622028	0.627	0.647	1
Ankrd12	0.0177013	-0.0633739	0.198	0.251	1
Psme4	0.0160081	-0.0637687	0.216	0.269	1
Cox7a2	0.418323	-0.0642281	0.458	0.46	1
Ndufa5	0.0255598	-0.0642881	0.289	0.341	1
Bdh2	0.00878203	-0.0643817	0.196	0.252	1
Mettl26	0.0192155	-0.0676443	0.236	0.287	1
Atp6v1e1	0.0557811	-0.0680696	0.262	0.305	1
Slc25a3	0.0257303	-0.0695565	0.498	0.55	1
Ubxn2a	0.011864	-0.0723473	0.202	0.256	1
Gstm5	0.195805	-0.0724596	0.309	0.337	1
Ankrd11	0.0347063	-0.0772627	0.258	0.301	1
Uqcrfs1	0.0125019	-0.0789116	0.289	0.338	1
Tmbim6	0.00602022	-0.0790234	0.613	0.668	1
Nars	0.00734849	-0.0798053	0.331	0.399	1
Sec62	0.00200324	-0.0809326	0.358	0.439	1
Cox6a1	0.189913	-0.0817743	0.731	0.695	1
Rsrp1	0.112438	-0.081979	0.329	0.358	1
Hist1h2bc	0.00709133	-0.0832103	0.336	0.404	1
Atp5j2	0.0306541	-0.0848323	0.411	0.459	1
Atf4	0.00677326	-0.084874	0.289	0.357	1
Prpf4b	0.0492006	-0.0850368	0.307	0.348	1
H2afj	0.0267656	-0.0862388	0.209	0.251	1
Taldo1	0.0179868	-0.0870954	0.291	0.342	1
Zbtb20	0.00456155	-0.0879749	0.58	0.648	1
Uqcrc2	0.00140531	-0.089442	0.193	0.261	1
Ggnbp2	0.00018359	-0.0902353	0.173	0.256	1
Srrm2	0.0223439	-0.0911025	0.453	0.498	1
Gss	0.000305524	-0.0925271	0.211	0.294	1
Ndufa10	0.00815993	-0.0937605	0.231	0.285	1
Gpx1	0.716013	-0.0955439	0.831	0.83	1
Atp5c1	0.062305	-0.0961866	0.396	0.425	1
Rdx	0.00188192	-0.0966508	0.353	0.423	1
Guca2b	2.49e-07	-0.0975631	0.296	0.452	0.00467395
Sod3	0.000552421	-0.0977818	0.207	0.283	1
Enpp2	0.000443893	-0.0978757	0.189	0.266	1
Suclg1	0.00630221	-0.0982237	0.249	0.308	1
Gadd45a	0.00818424	-0.0985633	0.229	0.285	1
Sdha	5.34e-05	-0.10123	0.202	0.295	0.999876
Atp2a2	0.00207414	-0.101414	0.287	0.357	1
Cycs	7.22e-05	-0.101666	0.2	0.289	1
Eif3a	0.105523	-0.101896	0.622	0.614	1
Sfxn1	0.000133173	-0.101995	0.269	0.364	1
Slc25a39	7.25e-06	-0.102818	0.256	0.37	0.135773
Vdac1	0.000285571	-0.102935	0.32	0.406	1
Folr1	3.45e-05	-0.104878	0.202	0.301	0.64696
Rb1cc1	6.79e-05	-0.105965	0.176	0.261	1
Sptlc2	0.00402251	-0.106595	0.224	0.28	1
Hadh	6.36e-05	-0.108352	0.182	0.269	1
Itsn2	2.29e-05	-0.108842	0.196	0.291	0.429045
Ogdh	5.7e-06	-0.109894	0.167	0.269	0.106755
Gnl3	9.43e-05	-0.110406	0.209	0.294	1
Scaf11	2.44e-05	-0.112963	0.24	0.34	0.457854
Gpx4	0.00440414	-0.11309	0.287	0.343	1
Uqcr11	0.00474494	-0.113769	0.378	0.43	1
Calml4	0.000601373	-0.11428	0.227	0.303	1
Ank3	4.69e-06	-0.118804	0.176	0.276	0.0878374
Eif5	9.12e-05	-0.119663	0.431	0.523	1
Eps8	5.88e-06	-0.122429	0.191	0.292	0.110234
Gipc2	1.07e-06	-0.124305	0.229	0.35	0.0200789
Ndufv3	6.06e-07	-0.124496	0.18	0.295	0.0113447
Ghitm	3.27e-05	-0.125609	0.309	0.414	0.612893
Retreg1	1.03e-05	-0.126587	0.178	0.275	0.192981
Atp5f1	0.000113966	-0.128771	0.342	0.435	1
Kcnj16	4.14e-05	-0.130662	0.229	0.318	0.77563
4833439L19Rik	5.05e-08	-0.13126	0.142	0.263	0.000945636
Steap2	3.02e-05	-0.133578	0.216	0.306	0.565327
Psap	0.00221456	-0.135597	0.309	0.365	1
Ech1	5.11e-05	-0.136054	0.213	0.302	0.95682
Pdha1	2.94e-07	-0.136683	0.191	0.31	0.00551402
Eea1	1.74e-07	-0.139079	0.2	0.326	0.00325376
Tgoln1	1.03e-05	-0.141465	0.233	0.332	0.193513
Nr1h4	7.35e-07	-0.142488	0.176	0.288	0.0137684
Hspe1	0.00883452	-0.144449	0.453	0.491	1
Gas2	1.07e-07	-0.145031	0.204	0.332	0.0019969
Gsr	6.31e-09	-0.145071	0.138	0.267	0.000118235
Slc3a2	1.68e-09	-0.145932	0.169	0.312	3.14e-05
Hint2	1.44e-05	-0.146336	0.184	0.276	0.270463
Rbm47	9.09e-08	-0.148013	0.224	0.353	0.00170351
Arhgap5	2.84e-07	-0.148461	0.311	0.448	0.00531269
Zfp706	2.83e-08	-0.150461	0.204	0.335	0.000530699
Phldb2	6.9e-07	-0.151416	0.276	0.393	0.0129282
Gcnt1	3.2e-06	-0.1515	0.184	0.282	0.059992
Etfa	1.17e-06	-0.153495	0.216	0.327	0.0218955
Aco2	1.78e-08	-0.153635	0.193	0.322	0.000333212
Atp11a	8.53e-05	-0.153635	0.173	0.254	1
Uqcrq	0.00109468	-0.153894	0.444	0.493	1
Ankrd13c	1.63e-10	-0.157077	0.118	0.256	3.06e-06
Atp5g3	0.000279124	-0.158392	0.553	0.593	1
Stard10	1.34e-08	-0.158436	0.16	0.286	0.00025114
Pter	9.9e-07	-0.158533	0.28	0.398	0.0185559
Suclg2	9.89e-10	-0.159097	0.164	0.303	1.85e-05
Glud1	1.41e-07	-0.162172	0.28	0.407	0.0026399
Dhrs4	2.05e-09	-0.164417	0.133	0.263	3.85e-05
Hmgcs1	1.21e-09	-0.164495	0.176	0.315	2.27e-05
Huwe1	1.43e-08	-0.165742	0.207	0.338	0.000268476
Scp2	1.18e-10	-0.166967	0.129	0.269	2.21e-06
Akr7a5	4.75e-10	-0.167802	0.138	0.274	8.9e-06
2810474O19Rik	0.0434777	-0.168571	0.278	0.311	1
Cisd1	8.95e-07	-0.170358	0.218	0.325	0.0167588
Uqcr10	0.000171562	-0.170927	0.44	0.509	1
Mep1a	5.89e-05	-0.171634	0.218	0.301	1
Dynll2	3.27e-09	-0.174058	0.169	0.301	6.12e-05
Sod2	6.95e-11	-0.175607	0.127	0.268	1.3e-06
Ctsb	1.14e-05	-0.176397	0.389	0.483	0.213293
Atp6v1b2	3.76e-09	-0.178274	0.253	0.393	7.04e-05
Hibadh	2.45e-12	-0.179294	0.118	0.271	4.58e-08
Slc20a1	1.93e-08	-0.179843	0.149	0.273	0.000361981
Chd3	2.81e-11	-0.18056	0.287	0.455	5.26e-07
Gm37376	1.44e-06	-0.184153	0.2	0.315	0.0269972
Gabarapl1	4.22e-07	-0.188533	0.356	0.473	0.00790831
Ccdc107	8.56e-12	-0.189135	0.162	0.319	1.6e-07
Cpeb4	2.5e-09	-0.189363	0.153	0.282	4.68e-05
Me1	2.75e-11	-0.189689	0.18	0.333	5.15e-07
Gas6	1.21e-11	-0.191382	0.144	0.294	2.27e-07
Sars	1.36e-09	-0.196073	0.227	0.369	2.54e-05
Atp5a1	2.1e-07	-0.196636	0.478	0.58	0.00393437
Mt1	0.00300343	-0.19746	0.373	0.447	1
Cryz	1.03e-12	-0.197619	0.142	0.302	1.93e-08
Mettl7a1	2.28e-12	-0.198603	0.16	0.323	4.26e-08
Slc6a18	4.77e-08	-0.2	0.156	0.271	0.000892908
Por	1.58e-10	-0.201723	0.191	0.333	2.95e-06
Smpdl3a	6.05e-15	-0.202498	0.093	0.264	1.13e-10
Chka	1.76e-06	-0.204104	0.218	0.322	0.0329161
Hspa8	3.64e-07	-0.205389	0.847	0.862	0.00681438
Grina	8.48e-12	-0.20627	0.216	0.377	1.59e-07
Klf9	3.71e-13	-0.210544	0.182	0.354	6.95e-09
Abcd3	7.54e-14	-0.21219	0.158	0.333	1.41e-09
Alas1	1.8e-13	-0.212639	0.107	0.266	3.37e-09
Tns1	1.36e-11	-0.213133	0.376	0.541	2.54e-07
Ctage5	8.77e-11	-0.214695	0.402	0.551	1.64e-06
Slc22a1	3.2e-19	-0.218893	0.069	0.263	5.99e-15
Tacc2	1.15e-13	-0.219911	0.127	0.294	2.16e-09
Abcg2	1.83e-14	-0.223014	0.231	0.418	3.44e-10
Lrpap1	1.36e-17	-0.225185	0.122	0.32	2.56e-13
Idh1	1.39e-11	-0.226107	0.189	0.345	2.6e-07
Ephx2	2.3e-17	-0.229466	0.093	0.28	4.31e-13
Gclm	5.31e-10	-0.235991	0.338	0.481	9.95e-06
Esd	1.6e-11	-0.238408	0.313	0.465	3e-07
Dao	2.75e-18	-0.240261	0.118	0.317	5.15e-14
Aldh9a1	4.15e-19	-0.244763	0.109	0.317	7.77e-15
Tkfc	7.56e-18	-0.246762	0.098	0.288	1.42e-13
Neu1	4.49e-15	-0.250035	0.2	0.384	8.41e-11
Cgnl1	1.88e-14	-0.251311	0.233	0.417	3.52e-10
Hnf4a	4.23e-21	-0.25237	0.093	0.309	7.93e-17
Rida	8.29e-11	-0.256018	0.447	0.586	1.55e-06
Pcx	1.74e-26	-0.262334	0.027	0.252	3.26e-22
Mettl7b	2.97e-19	-0.264686	0.089	0.286	5.56e-15
Etfb	2.03e-14	-0.269003	0.313	0.487	3.81e-10
Phyh	1.15e-18	-0.269949	0.14	0.344	2.16e-14
Spag9	1.94e-15	-0.271121	0.202	0.388	3.63e-11
Pth1r	1.31e-18	-0.272194	0.156	0.361	2.45e-14
Nus1	3.88e-20	-0.274874	0.142	0.358	7.27e-16
Acadm	3.48e-14	-0.279098	0.242	0.414	6.52e-10
Atp1a1	6.64e-13	-0.279398	0.571	0.692	1.24e-08
Nabp1	4.77e-23	-0.279585	0.053	0.266	8.94e-19
Napsa	3.55e-06	-0.281736	0.211	0.304	0.0664144
Igfbp4	6.7e-14	-0.282272	0.353	0.525	1.26e-09
Sptbn1	2.72e-11	-0.283781	0.436	0.573	5.1e-07
Slc22a18	5.93e-26	-0.285424	0.064	0.302	1.11e-21
Slc47a1	4.64e-23	-0.286144	0.107	0.335	8.69e-19
Nox4	9.75e-24	-0.286468	0.084	0.317	1.83e-19
Pecr	7.01e-24	-0.286984	0.053	0.273	1.31e-19
Fmo2	9.63e-29	-0.288976	0.038	0.284	1.8e-24
Arl6ip1	4.67e-13	-0.289934	0.389	0.544	8.75e-09
Cda	2.73e-24	-0.290572	0.096	0.335	5.12e-20
Mdh1	1.57e-14	-0.291086	0.378	0.547	2.94e-10
Golga4	6.15e-18	-0.291499	0.396	0.617	1.15e-13
Herpud1	5.11e-17	-0.293136	0.153	0.351	9.58e-13
Gstt2	4.52e-11	-0.29432	0.176	0.32	8.46e-07
Timp3	7.8e-18	-0.308597	0.656	0.791	1.46e-13
Hspd1	4.03e-16	-0.310232	0.438	0.602	7.54e-12
Nat8f1	1.14e-25	-0.31093	0.033	0.256	2.14e-21
Pah	1.36e-28	-0.31195	0.044	0.292	2.55e-24
Sod1	1.1e-17	-0.313219	0.338	0.523	2.07e-13
Aldh2	4.66e-22	-0.313601	0.198	0.431	8.72e-18
Srxn1	1.51e-15	-0.316143	0.113	0.289	2.83e-11
Aass	3.97e-32	-0.317566	0.024	0.285	7.43e-28
Pdzk1	2.9e-21	-0.31774	0.26	0.503	5.43e-17
Pdzk1ip1	9.5e-17	-0.321416	0.344	0.531	1.78e-12
Aldh6a1	1.67e-31	-0.321928	0.067	0.34	3.13e-27
Lipa	1.21e-20	-0.322534	0.204	0.423	2.27e-16
Gk	5.48e-26	-0.32407	0.116	0.367	1.03e-21
Nudt19	1.12e-13	-0.324415	0.116	0.272	2.1e-09
Tmem174	5.44e-26	-0.329744	0.151	0.414	1.02e-21
Cyb5a	1.15e-15	-0.330917	0.347	0.535	2.15e-11
Selenbp1	3.56e-25	-0.331053	0.111	0.359	6.68e-21
Lactb2	1.87e-27	-0.33177	0.147	0.411	3.5e-23
Spink1	7.06e-19	-0.335238	0.564	0.765	1.32e-14
Atp1b1	2.23e-22	-0.335969	0.7	0.829	4.17e-18
Acaa1b	5.7e-28	-0.336527	0.051	0.296	1.07e-23
Gsta2	6.71e-23	-0.339935	0.162	0.409	1.26e-18
Selenop	8.51e-19	-0.344123	0.44	0.642	1.59e-14
Maf	1.31e-22	-0.358531	0.233	0.476	2.46e-18
Mfsd4b5	1.78e-32	-0.359522	0.087	0.369	3.34e-28
Cyp2j5	7.94e-28	-0.367121	0.3	0.578	1.49e-23
Mpp1	4.56e-30	-0.367425	0.104	0.379	8.55e-26
Slc22a12	2.22e-40	-0.368689	0	0.3	4.16e-36
Hspa9	8.21e-26	-0.37607	0.364	0.608	1.54e-21
Acat1	3.44e-23	-0.376979	0.218	0.453	6.45e-19
Gm19950	1.23e-33	-0.380242	0.053	0.334	2.3e-29
Ndrg1	4.28e-18	-0.380429	0.713	0.83	8.01e-14
Slc17a1	1.08e-36	-0.386094	0.104	0.414	2.02e-32
Ces1f	1.24e-37	-0.389825	0.018	0.312	2.31e-33
Kcnj15	2.46e-36	-0.389858	0.147	0.466	4.62e-32
Cndp2	2.05e-14	-0.39049	0.222	0.388	3.84e-10
Tcn2	1.56e-35	-0.391204	0.122	0.432	2.93e-31
Ftl1	1.08e-13	-0.391696	0.487	0.605	2.03e-09
Chchd10	2.69e-24	-0.397827	0.367	0.588	5.04e-20
Khk	4.81e-33	-0.401618	0.08	0.367	9.02e-29
Neat1	6.29e-12	-0.405667	0.533	0.637	1.18e-07
Gclc	7.75e-21	-0.407319	0.131	0.343	1.45e-16
Glyat	8.11e-33	-0.42159	0.329	0.628	1.52e-28
Slc22a6	1.05e-39	-0.426186	0.007	0.306	1.96e-35
Plin2	2.31e-20	-0.431794	0.169	0.384	4.33e-16
Cat	1.54e-42	-0.435357	0.131	0.477	2.89e-38
Dnase1	2.98e-32	-0.436324	0.011	0.266	5.58e-28
Txnrd1	1.05e-22	-0.438903	0.293	0.509	1.96e-18
Dab2	1.34e-31	-0.452185	0.322	0.603	2.51e-27
Slc17a3	2.07e-47	-0.453104	0.073	0.44	3.88e-43
Ugt3a2	5.31e-53	-0.453913	0.007	0.381	9.95e-49
Lpl	5.39e-33	-0.456771	0.049	0.325	1.01e-28
Fut9	2.81e-35	-0.458574	0.227	0.534	5.26e-31
Osgin1	2.16e-29	-0.474726	0.036	0.284	4.04e-25
Keg1	1.37e-34	-0.48734	0.22	0.525	2.56e-30
Slc4a4	5.16e-34	-0.498554	0.404	0.695	9.66e-30
Lgmn	1.42e-28	-0.501289	0.364	0.606	2.66e-24
Ggt1	6.95e-48	-0.501682	0.107	0.476	1.3e-43
Sqstm1	4.69e-21	-0.508938	0.504	0.664	8.79e-17
Fbp1	5.12e-50	-0.514001	0.033	0.404	9.59e-46
Gm42418	1.01e-13	-0.515166	0.869	0.921	1.89e-09
Inmt	9.55e-36	-0.525306	0.018	0.297	1.79e-31
Acy3	5.76e-35	-0.535129	0.089	0.384	1.08e-30
Ldhd	1.69e-51	-0.536491	0.051	0.43	3.16e-47
Oxct1	3.37e-49	-0.541291	0.176	0.55	6.3e-45
Slc13a1	1.17e-33	-0.545169	0.273	0.577	2.19e-29
Akr1a1	2.76e-44	-0.564135	0.436	0.719	5.18e-40
Sord	6.77e-64	-0.569668	0.069	0.512	1.27e-59
Ttc36	1.67e-36	-0.576511	0.138	0.445	3.13e-32
Hmox1	8.22e-33	-0.57723	0.073	0.352	1.54e-28
Ugt2b38	1.19e-60	-0.57831	0.044	0.468	2.23e-56
Acox1	1.51e-50	-0.587452	0.173	0.55	2.84e-46
Tmem27	1.82e-50	-0.587673	0.398	0.728	3.4e-46
Slc5a2	1.13e-51	-0.588013	0.024	0.396	2.12e-47
Sult1d1	3.16e-51	-0.609487	0.356	0.711	5.91e-47
Abcc2	9.67e-59	-0.616798	0.067	0.486	1.81e-54
Fxyd2	1.06e-53	-0.621891	0.616	0.895	1.99e-49
Prdx5	8.97e-51	-0.624824	0.382	0.704	1.68e-46
4931406C07Rik	2.17e-68	-0.635795	0.131	0.585	4.06e-64
Cyp2e1	5.33e-46	-0.65912	0.022	0.363	9.99e-42
Fth1	2.79e-44	-0.68591	0.92	0.959	5.23e-40
Chpt1	3.21e-63	-0.695037	0.467	0.788	6.01e-59
Slc27a2	1.13e-53	-0.69838	0.378	0.733	2.12e-49
Lrp2	3.9e-83	-0.743422	0.127	0.638	7.3e-79
mt-Co1	5.34e-49	-0.815483	0.413	0.685	1e-44
Akr1c21	2.49e-79	-0.849173	0.038	0.542	4.67e-75
Malat1	7.26e-38	-0.861528	1	0.993	1.36e-33
Pck1	3.64e-63	-0.879827	0.033	0.463	6.81e-59
Ass1	1.57e-98	-0.930558	0.098	0.661	2.94e-94
Cyp4b1	1.61e-85	-0.943974	0.138	0.649	3.01e-81
mt-Nd1	2.47e-82	-1.01634	0.689	0.896	4.62e-78
mt-Nd4	1.41e-76	-1.0361	0.613	0.854	2.65e-72
mt-Cytb	3.85e-87	-1.08389	0.847	0.958	7.22e-83
Miox	5.85e-117	-1.12962	0.031	0.67	1.1e-112
Aldob	1.47e-124	-1.14065	0.404	0.885	2.75e-120
mt-Nd5	1.85e-86	-1.17266	0.862	0.951	3.46e-82
mt-Nd2	4.67e-102	-1.24859	0.758	0.937	8.74e-98
mt-Rnr2	4.02e-146	-1.25413	1	1	7.54e-142
Slc34a1	4.92e-167	-1.44888	0.116	0.847	9.21e-163
mt-Rnr1	1.06e-136	-1.59691	0.893	0.99	1.99e-132
Acsm2	2.77e-181	-1.63556	0.269	0.916	5.18e-177
Gpx3	2.91e-161	-1.81107	0.887	0.992	5.45e-157
Kap	7.62e-56	-2.49203	0.416	0.693	1.43e-51

## Sheet: PT (IRI) vs Nephron (IRI)
gene	p_val	avg_logFC	pct.1	pct.2	p_val_adj
Kap	0	2.74842	0.693	0.377	0
Gpx3	0	2.63627	0.992	0.558	0
Acsm2	0	1.84343	0.916	0.103	0
Aldob	0	1.58698	0.885	0.103	0
Slc34a1	0	1.47087	0.847	0.102	0
Spink1	0	1.18018	0.765	0.102	0
Slc27a2	0	1.14309	0.733	0.06	0
Miox	0	1.11657	0.67	0.046	0
Gpx1	0	1.08499	0.83	0.492	0
Cyp4b1	0	1.05357	0.649	0.065	0
Tmem27	0	0.985245	0.728	0.097	0
Ass1	0	0.984802	0.661	0.05	0
Slc4a4	0	0.964884	0.695	0.095	0
Slc13a1	0	0.906627	0.577	0.041	0
Pck1	0	0.880241	0.463	0.034	0
Akr1c21	0	0.874092	0.542	0.026	0
Chpt1	0	0.862458	0.788	0.333	0
Lrp2	0	0.849877	0.638	0.047	0
Sult1d1	0	0.829974	0.711	0.176	0
Ndrg1	0	0.789443	0.83	0.524	0
Glyat	0	0.770134	0.628	0.053	0
Selenop	0	0.747524	0.642	0.171	0
Keg1	0	0.727779	0.525	0.039	0
mt-Rnr1	7.25302e-205	0.71642	0.99	0.973	1.35878e-200
Cyp2j5	0	0.704159	0.578	0.041	0
4931406C07Rik	0	0.686854	0.585	0.09	0
Abcc2	0	0.678286	0.486	0.023	0
Igfbp4	0	0.668476	0.525	0.059	0
Cyp2e1	0	0.667618	0.363	0.014	0
Akr1a1	0	0.664968	0.719	0.344	0
Ttc36	0	0.664097	0.445	0.066	0
Dab2	0	0.65225	0.603	0.146	0
Timp3	4.35388e-274	0.644741	0.791	0.463	8.15656e-270
Fut9	0	0.643006	0.534	0.073	0
Acox1	0	0.64278	0.55	0.13	0
Pdzk1	0	0.625462	0.503	0.037	0
Rida	0	0.624589	0.586	0.162	0
Gm42418	2.95152e-97	0.622653	0.921	0.858	5.52937e-93
Lgmn	1.97053e-250	0.618374	0.606	0.283	3.6916e-246
Ugt2b38	0	0.613449	0.468	0.021	0
Dbi	5.61907e-203	0.611592	0.75	0.513	1.05268e-198
Acy3	0	0.610664	0.384	0.033	0
Sord	0	0.603539	0.512	0.049	0
Maf	0	0.599154	0.476	0.051	0
Slc5a2	0	0.588134	0.396	0.022	0
Guca2b	0	0.586858	0.452	0.053	0
Plin2	0	0.586078	0.384	0.059	0
Fth1	6.14241e-179	0.576488	0.959	0.899	1.15072e-174
Cndp2	2.73449e-306	0.559216	0.388	0.082	5.1228e-302
Fbp1	0	0.545612	0.404	0.016	0
Hmox1	2.49101e-225	0.545153	0.352	0.09	4.66666e-221
Gsta2	0	0.544175	0.409	0.034	0
Kcnj15	0	0.539279	0.466	0.03	0
Slc17a3	0	0.526275	0.44	0.021	0
Sqstm1	4.10336e-123	0.52608	0.664	0.459	7.68723e-119
Cyb5a	1.42012e-229	0.517216	0.535	0.219	2.66045e-225
Inmt	0	0.514289	0.297	0.026	0
Tmem174	0	0.505557	0.414	0.023	0
Ggt1	0	0.503208	0.476	0.105	0
Napsa	0	0.502419	0.304	0.038	0
Cat	0	0.494169	0.477	0.083	0
Lipa	0	0.484635	0.423	0.054	0
Slc17a1	0	0.472253	0.414	0.024	0
Zbtb20	1.87967e-205	0.46969	0.648	0.334	3.52136e-201
Osgin1	1.12116e-277	0.46721	0.284	0.039	2.10039e-273
Hspd1	1.04138e-198	0.464118	0.602	0.307	1.95092e-194
Mpp1	0	0.460913	0.379	0.032	0
Khk	0	0.457869	0.367	0.034	0
Pter	0	0.451377	0.398	0.032	0
Ugt3a2	0	0.443107	0.381	0.019	0
Abcg2	0	0.442607	0.418	0.047	0
Mfsd4b5	0	0.436854	0.369	0.016	0
Hspa8	8.95706e-152	0.436291	0.862	0.706	1.67802e-147
Dnase1	0	0.433147	0.266	0.012	0
Slc22a6	0	0.421198	0.306	0.011	0
Gm19950	0	0.420791	0.334	0.017	0
Gk	0	0.415534	0.367	0.035	0
Ldhd	1.19575e-301	0.415453	0.43	0.099	2.24012e-297
Lactb2	0	0.414862	0.411	0.071	0
Tmem252	5.36598e-291	0.411771	0.379	0.074	1.00526e-286
Tcn2	5.35209e-285	0.409005	0.432	0.112	1.00266e-280
Ftl1	1.52865e-75	0.407191	0.605	0.459	2.86378e-71
Ces1f	0	0.406983	0.312	0.008	0
Gstm5	5.09081e-243	0.403466	0.337	0.074	9.53711e-239
Mep1a	0	0.400333	0.301	0.025	0
Sod1	1.96153e-171	0.399361	0.523	0.252	3.67474e-167
Cyba	6.89209e-216	0.395496	0.491	0.179	1.29116e-211
Idh1	0	0.39282	0.345	0.055	0
Selenbp1	1.06172e-272	0.39	0.359	0.075	1.98902e-268
Gclm	5.71837e-195	0.38849	0.481	0.187	1.07128e-190
Gstt2	1.91027e-183	0.385016	0.32	0.088	3.5787e-179
Slc47a1	0	0.374229	0.335	0.021	0
Acaa1b	0	0.372398	0.296	0.018	0
Cldn2	0	0.3723	0.359	0.059	0
Nox4	0	0.371853	0.317	0.019	0
Cda	0	0.371767	0.335	0.03	0
mt-Rnr2	4.04074e-127	0.37058	1	1	7.56993e-123
Hspa9	3.79661e-118	0.365413	0.608	0.385	7.11256e-114
Slc22a12	0	0.36423	0.3	0.004	0
Calml4	0	0.363006	0.303	0.03	0
Gas2	0	0.360669	0.332	0.034	0
Me1	0	0.356614	0.333	0.033	0
Neu1	7.51903e-230	0.356293	0.384	0.104	1.40861e-225
Malat1	1.30451e-18	0.355129	0.993	1	2.44387e-14
Dao	0	0.348931	0.317	0.021	0
Hspe1	1.01687e-121	0.347105	0.491	0.26	1.90501e-117
Mettl7b	0	0.346751	0.286	0.014	0
Hnf4a	0	0.343099	0.309	0.016	0
Esd	4.07069e-135	0.338879	0.465	0.222	7.62603e-131
Nudt19	2.60528e-103	0.336873	0.272	0.103	4.88073e-99
Slc6a18	2.20084e-281	0.330553	0.271	0.032	4.12305e-277
Pecr	0	0.330272	0.273	0.016	0
Lpl	9.12758e-96	0.330198	0.325	0.145	1.70996e-91
Pah	0	0.328364	0.292	0.027	0
Tkfc	0	0.32804	0.288	0.023	0
Sfxn1	3.65284e-261	0.325927	0.364	0.079	6.84324e-257
Aass	0	0.322834	0.285	0.017	0
Folr1	0	0.321505	0.301	0.036	0
Nat8f1	5.30865e-308	0.321454	0.256	0.022	9.94522e-304
Herpud1	5.99157e-128	0.320651	0.351	0.138	1.12246e-123
Slc22a18	0	0.320131	0.302	0.03	0
Atp6v1b2	4.47793e-165	0.317636	0.393	0.143	8.38895e-161
Ephx2	0	0.317351	0.28	0.025	0
Fmo2	0	0.315387	0.284	0.014	0
Nr1h4	5.27601e-289	0.314281	0.288	0.037	9.88408e-285
Slc20a1	1.9793e-167	0.310663	0.273	0.068	3.70801e-163
Sod3	0	0.310568	0.283	0.027	0
Aldh2	1.4117e-133	0.308801	0.431	0.194	2.64468e-129
Nus1	3.42262e-184	0.306215	0.358	0.11	6.41193e-180
Steap2	5.19775e-213	0.306038	0.306	0.068	9.73747e-209
Gcnt1	8.24649e-277	0.305054	0.282	0.038	1.5449e-272
Aldh6a1	9.62671e-225	0.303946	0.34	0.082	1.80347e-220
Chd3	4.07221e-153	0.300401	0.455	0.195	7.62888e-149
Eif3a	3.03453e-56	0.297292	0.614	0.483	5.68489e-52
Ctage5	4.99527e-89	0.295826	0.551	0.349	9.35814e-85
Cryz	2.67587e-251	0.293057	0.302	0.053	5.01297e-247
Golga4	2.0368e-72	0.289522	0.617	0.442	3.81574e-68
Acat1	1.24127e-64	0.288213	0.453	0.292	2.3254e-60
Slc22a1	0	0.287004	0.263	0.012	0
Txnrd1	7.86092e-47	0.283504	0.509	0.381	1.47266e-42
Grina	1.63844e-136	0.278975	0.377	0.15	3.06946e-132
Dhcr24	1.94842e-206	0.277343	0.292	0.062	3.65017e-202
Aldh9a1	3.2163e-165	0.274988	0.317	0.093	6.02542e-161
Pcx	0	0.273998	0.252	0.016	0
Etfb	6.40933e-80	0.272649	0.487	0.299	1.20072e-75
Gss	7.27693e-216	0.270334	0.294	0.06	1.36326e-211
Mettl7a1	7.03581e-151	0.264819	0.323	0.104	1.31809e-146
Lrpap1	2.61789e-154	0.264346	0.32	0.101	4.90436e-150
Amn	0	0.263411	0.253	0.019	0
Bdh2	1.24882e-261	0.262597	0.252	0.029	2.33954e-257
Por	1.21612e-128	0.260703	0.333	0.125	2.27829e-124
Spag9	5.9008e-83	0.259557	0.388	0.205	1.10546e-78
Hsp90aa1	4.40593e-17	0.258585	0.711	0.692	8.25406e-13
Cyr61	3.51531e-34	0.25645	0.381	0.257	6.58558e-30
mt-Nd2	2.73705e-38	0.251826	0.937	0.887	5.1276e-34
Enpp2	2.26042e-176	0.24904	0.266	0.06	4.23466e-172
Alas1	1.24189e-123	0.245295	0.266	0.085	2.32656e-119
Acadm	1.31563e-57	0.244864	0.414	0.262	2.46471e-53
Ccdc107	1.71719e-135	0.244239	0.319	0.109	3.21698e-131
Tns1	1.6664e-60	0.243511	0.541	0.377	3.12183e-56
Sars	6.26832e-79	0.243332	0.369	0.193	1.17431e-74
Prdx5	5.12679e-38	0.243078	0.704	0.62	9.60453e-34
Gstm1	3.80543e-83	0.236627	0.292	0.126	7.12909e-79
Akr7a5	6.8228e-140	0.234458	0.274	0.08	1.27818e-135
Klf9	9.813e-85	0.232399	0.354	0.173	1.83837e-80
Ddah1	2.41187e-190	0.231876	0.258	0.051	4.5184e-186
mt-Nd1	1.36834e-31	0.227768	0.896	0.837	2.56345e-27
Nceh1	1.10844e-125	0.225664	0.29	0.096	2.07655e-121
St13	7.64367e-57	0.224382	0.492	0.331	1.43197e-52
Lap3	7.05992e-119	0.223377	0.286	0.098	1.32261e-114
Arl6ip1	1.99689e-34	0.217654	0.544	0.433	3.74098e-30
Slc6a6	2.98486e-125	0.216672	0.327	0.119	5.59184e-121
Hist1h2bc	1.06819e-48	0.215821	0.404	0.253	2.00115e-44
Slc25a39	9.80586e-74	0.208869	0.37	0.194	1.83703e-69
Park7	2.40242e-50	0.207758	0.437	0.284	4.50069e-46
Glud1	7.77385e-55	0.207009	0.407	0.252	1.45635e-50
Dhrs4	3.67169e-102	0.206747	0.263	0.094	6.87855e-98
Myo6	1.96119e-64	0.201205	0.479	0.298	3.67409e-60
Hmgcs1	2.07489e-69	0.197158	0.315	0.155	3.88711e-65
Gclc	1.9522e-18	0.196184	0.343	0.263	3.65725e-14
Gnl3	1.71356e-71	0.190174	0.294	0.138	3.21018e-67
Vdac1	4.86554e-51	0.189027	0.406	0.255	9.11509e-47
Eea1	6.74592e-60	0.187667	0.326	0.174	1.26378e-55
Atp2a2	1.25059e-58	0.186953	0.357	0.201	2.34285e-54
Hint1	3.28766e-39	0.186606	0.47	0.335	6.1591e-35
Srxn1	2.45233e-23	0.181725	0.289	0.2	4.5942e-19
Sptbn1	4.58415e-15	0.179949	0.573	0.522	8.58794e-11
Cpeb4	2.49106e-52	0.179753	0.282	0.148	4.66676e-48
Erdr1	4.57057e-25	0.177964	0.322	0.228	8.5625e-21
Ankrd13c	1.06143e-79	0.177191	0.256	0.104	1.98849e-75
Eif5	8.48807e-28	0.177076	0.523	0.423	1.59015e-23
Nap1l1	4.18858e-40	0.176865	0.35	0.222	7.84689e-36
Retreg1	4.81159e-51	0.175899	0.275	0.145	9.01404e-47
Stard10	2.15524e-59	0.17523	0.286	0.144	4.03764e-55
Scp2	1.88493e-65	0.17431	0.269	0.126	3.53124e-61
Slc3a2	3.79706e-50	0.173628	0.312	0.175	7.1134e-46
Tkt	6.40813e-55	0.173121	0.338	0.189	1.2005e-50
Mettl26	1.10412e-54	0.17158	0.287	0.15	2.06845e-50
Tmbim4	3.20255e-40	0.171196	0.316	0.192	5.99966e-36
Abcd3	2.45143e-47	0.170671	0.333	0.196	4.59251e-43
Hint2	2.59054e-42	0.166655	0.276	0.157	4.85312e-38
C130074G19Rik	1.22357e-49	0.165028	0.329	0.187	2.29223e-45
Hadh	6.8961e-68	0.164712	0.269	0.122	1.29192e-63
Huwe1	3.12558e-36	0.163463	0.338	0.218	5.85546e-32
Nars	1.19874e-27	0.160579	0.399	0.293	2.24571e-23
Lamp1	1.71335e-25	0.159578	0.525	0.424	3.20979e-21
Prpf38b	7.78807e-32	0.159229	0.402	0.283	1.45902e-27
Zfp706	5.43747e-45	0.158798	0.335	0.2	1.01866e-40
Nme1	5.64388e-31	0.15873	0.348	0.232	1.05732e-26
Prdx1	1.12233e-07	0.154889	0.59	0.552	0.00210258
Atp11a	2.8813e-19	0.154142	0.254	0.178	5.39783e-15
Ncl	2.47526e-10	0.153931	0.71	0.708	4.63714e-06
Fam213a	2.13168e-51	0.150767	0.289	0.152	3.99348e-47
Pth1r	6.55444e-62	0.150003	0.361	0.191	1.22791e-57
Ak2	2.56692e-53	0.149091	0.258	0.128	4.80886e-49
Glul	4.92909e-49	0.148185	0.279	0.147	9.23416e-45
Mlec	2.71494e-41	0.147936	0.353	0.218	5.08617e-37
Eps8	1.44036e-69	0.146861	0.292	0.133	2.69837e-65
Ech1	6.50043e-31	0.144971	0.302	0.194	1.21779e-26
Dnaja1	2.30641e-12	0.144341	0.45	0.386	4.32083e-08
Tpt1	1.48455e-19	0.143524	0.558	0.474	2.78116e-15
Errfi1	5.67699e-20	0.14289	0.52	0.416	1.06353e-15
Cisd1	1.14073e-23	0.142086	0.325	0.23	2.13705e-19
Gipc2	5.20467e-35	0.138903	0.35	0.225	9.75044e-31
Picalm	1.05179e-33	0.137661	0.35	0.23	1.97043e-29
Cebpb	5.06183e-21	0.137013	0.335	0.244	9.48283e-17
Chchd10	3.92874e-16	0.135957	0.588	0.513	7.3601e-12
Cgnl1	3.46942e-22	0.135841	0.417	0.319	6.49961e-18
4833439L19Rik	1.0252e-45	0.135344	0.263	0.14	1.92061e-41
Dynll2	1.68273e-27	0.135136	0.301	0.2	3.15243e-23
Gsr	3.16636e-37	0.130408	0.267	0.154	5.93185e-33
Gas6	6.93669e-35	0.129969	0.294	0.178	1.29952e-30
Sptlc2	6.56297e-25	0.129912	0.28	0.187	1.22951e-20
Gpx4	6.24037e-16	0.128168	0.343	0.269	1.16907e-11
mt-Cytb	8.13148e-14	0.127906	0.958	0.935	1.52335e-09
2810474O19Rik	0.00338376	0.12741	0.311	0.291	1
Plau	4.24764e-24	0.125883	0.309	0.209	7.95752e-20
Txndc17	1.34315e-22	0.124736	0.353	0.256	2.51626e-18
Rbm47	2.35187e-22	0.124606	0.353	0.257	4.40599e-18
Nabp1	1.41948e-27	0.123051	0.266	0.167	2.65925e-23
Smpdl3a	6.33072e-29	0.122112	0.264	0.163	1.186e-24
Rrbp1	1.41329e-13	0.119945	0.52	0.457	2.64766e-09
Igf1r	3.81972e-29	0.119444	0.291	0.185	7.15586e-25
Ddx21	3.78176e-17	0.119239	0.298	0.219	7.08474e-13
Wwp1	3.33533e-23	0.119105	0.29	0.198	6.2484e-19
Marc2	9.05257e-25	0.117682	0.309	0.209	1.69591e-20
Tpr	1.33041e-11	0.117324	0.473	0.409	2.49238e-07
Mdh1	3.33291e-11	0.116884	0.547	0.483	6.24388e-07
Psap	3.32637e-11	0.116849	0.365	0.306	6.23162e-07
Hspa5	7.79903e-08	0.116758	0.709	0.683	0.00146107
Tgoln1	1.25049e-16	0.114352	0.332	0.252	2.34267e-12
Ccar1	9.23318e-19	0.11367	0.344	0.254	1.72974e-14
Hibadh	1.78216e-26	0.113363	0.271	0.175	3.3387e-22
Ndufv3	2.98224e-21	0.113025	0.295	0.206	5.58694e-17
Cdk11b	1.06961e-12	0.110678	0.346	0.278	2.00381e-08
Suclg2	3.18308e-21	0.108204	0.303	0.211	5.96318e-17
Rbm25	2.62405e-12	0.107427	0.503	0.436	4.9159e-08
Txn1	4.13553e-10	0.106806	0.526	0.469	7.74751e-06
mt-Co1	0.00239216	0.106122	0.685	0.681	1
Rock2	1.07307e-10	0.105593	0.389	0.327	2.0103e-06
Prrc2c	4.41411e-07	0.10099	0.5	0.463	0.00826939
Eprs	2.49706e-14	0.100903	0.301	0.228	4.67798e-10
Gm37376	0.000266373	0.100863	0.315	0.282	1
Lamp2	4.79547e-14	0.0999902	0.51	0.433	8.98383e-10
Suclg1	1.40295e-13	0.0989557	0.308	0.236	2.62828e-09
Oxct1	5.24686e-25	0.0973039	0.55	0.424	9.82948e-21
Eif5b	4.90599e-10	0.0964768	0.492	0.43	9.19089e-06
Kmt5a	1.92474e-16	0.0963547	0.253	0.179	3.6058e-12
Ankrd11	6.03362e-11	0.0950206	0.301	0.24	1.13034e-06
Rdx	2.74941e-14	0.095013	0.423	0.342	5.15075e-10
Phyh	9.14801e-10	0.0899365	0.344	0.283	1.71379e-05
Arpp19	9.84485e-11	0.0855159	0.329	0.266	1.84434e-06
Tacc2	7.95694e-12	0.0848342	0.294	0.227	1.49065e-07
Etfa	7.54811e-08	0.0802188	0.327	0.273	0.00141406
Atf4	1.46859e-05	0.0792372	0.357	0.318	0.275126
Cltc	1.12264e-14	0.0787906	0.286	0.211	2.10315e-10
Ubxn4	1.79025e-08	0.0782397	0.389	0.331	0.000335386
Sod2	6.48135e-11	0.0759285	0.268	0.205	1.21422e-06
Plscr2	6.20633e-11	0.0742574	0.384	0.31	1.16269e-06
Vcp	2.89452e-07	0.0726011	0.366	0.315	0.00542258
Gabarapl1	2.68682e-07	0.0714493	0.473	0.414	0.00503348
Srsf2	3.08338e-06	0.0712933	0.314	0.269	0.0577641
Akap9	3.93098e-07	0.0703955	0.425	0.373	0.00736429
Prpf4b	6.11999e-06	0.0700249	0.348	0.304	0.114652
Psme4	9.30137e-11	0.0698424	0.269	0.207	1.74252e-06
Taldo1	4.56206e-06	0.0674762	0.342	0.297	0.0854657
Mtdh	2.72488e-07	0.0670208	0.345	0.292	0.00510479
Cycs	1.7993e-09	0.0666839	0.289	0.23	3.3708e-05
Cux1	3.1178e-10	0.0663023	0.269	0.208	5.84089e-06
Scaf11	1.22498e-06	0.0642244	0.34	0.291	0.0229489
Ctsb	0.0407803	0.0635635	0.483	0.482	1
Golgb1	6.58849e-05	0.0628506	0.378	0.339	1
Kif1b	5.81305e-10	0.0627916	0.259	0.2	1.08902e-05
Hdgf	1.44647e-05	0.0609488	0.343	0.303	0.270981
Tpi1	7.54112e-05	0.060216	0.35	0.311	1
Tmbim6	0.000949563	0.0574296	0.668	0.651	1
Eif4g2	0.00011442	0.0566883	0.402	0.363	1
Ank3	2.62857e-07	0.056515	0.276	0.226	0.00492436
BC005537	2.18878e-05	0.05631	0.334	0.291	0.410046
Gspt1	8.23953e-07	0.0553725	0.288	0.239	0.0154359
Rb1cc1	5.17801e-06	0.0548538	0.261	0.218	0.0970048
Fxr1	9.63872e-07	0.0530902	0.261	0.214	0.0180572
Ncor1	0.000193167	0.0526503	0.422	0.386	1
Itsn2	7.84887e-07	0.0521299	0.291	0.24	0.0147041
Ghitm	0.000130496	0.0517474	0.414	0.374	1
Zfp91	3.72156e-06	0.0509113	0.322	0.275	0.0697197
Ybx1	0.765557	0.0508987	0.698	0.704	1
Eif6	0.000652307	0.0502744	0.269	0.237	1
Eif3c	0.131869	0.049931	0.463	0.461	1
Snx6	0.000599768	0.0497547	0.269	0.238	1
Ldha	6.45774e-05	0.0496374	0.438	0.395	1
Hdlbp	2.61926e-06	0.0487463	0.279	0.233	0.0490693
Sdhb	0.0208303	0.0467261	0.291	0.27	1
Cct6a	6.41891e-05	0.0452713	0.334	0.29	1
Pcbp1	0.000158324	0.044158	0.26	0.224	1
Adss	0.000703921	0.0414162	0.266	0.235	1
Rab7	0.00359441	0.0404014	0.251	0.225	1
Atp2b1	0.00578468	0.0385972	0.336	0.309	1
Rsrp1	0.733569	0.0385561	0.358	0.362	1
Ndufa10	0.0479355	0.0385089	0.285	0.269	1
Abcf1	0.00464626	0.0365418	0.271	0.244	1
Pnpla8	2.60431e-05	0.0361887	0.262	0.219	0.487891
Ccdc50	8.7435e-05	0.0356312	0.277	0.235	1
Nktr	0.0997697	0.0350643	0.276	0.261	1
Eef2	0.0517761	0.0326848	0.5	0.481	1
Uqcr10	0.911988	0.032303	0.509	0.519	1
Ggnbp2	0.0294291	0.0313376	0.256	0.235	1
Pdha1	0.0205999	0.0311897	0.31	0.287	1
Uqcrc2	0.00205279	0.0307668	0.261	0.23	1
Sdha	0.00349686	0.0304061	0.295	0.264	1
Dnaja2	0.00424953	0.0275539	0.271	0.241	1
Tmem176a	0.148357	0.0272261	0.472	0.459	1
Rab1a	0.0497653	0.0269252	0.261	0.242	1
Aco2	0.00191616	0.0268061	0.322	0.286	1
Uqcrq	0.406291	0.0260676	0.493	0.494	1
Mif	0.46177	0.0259021	0.337	0.33	1
Atox1	0.404998	0.0254129	0.338	0.33	1
Ndufs6	0.268645	0.0217982	0.256	0.246	1
Timm13	0.404694	0.0217748	0.266	0.26	1
Ankrd12	0.815001	0.0207581	0.251	0.251	1
Ndufa2	0.819222	0.0186817	0.407	0.424	1
Psmc1	0.138848	0.018537	0.272	0.258	1
Phf3	0.091982	0.0184451	0.255	0.238	1
mt-Nd5	1.29806e-05	0.0175908	0.951	0.94	0.243178
Sltm	0.59177	0.0168615	0.275	0.272	1
Ogdh	0.0725097	0.0159028	0.269	0.249	1
Ndufb3	0.196604	0.0156335	0.268	0.256	1
Chchd2	0.184032	0.0155788	0.667	0.703	1
Eif4g1	0.794351	0.0146077	0.36	0.363	1
Wapl	0.0857951	0.0118994	0.257	0.239	1
Ndufa6	0.438282	0.0116538	0.38	0.398	1
Gabarap	0.919144	0.00962322	0.365	0.369	1
Eif2s2	0.565047	0.0082995	0.37	0.386	1
Rpsa	0.584891	0.00673683	0.47	0.484	1
Pnn	0.709021	0.00305934	0.351	0.356	1
Npm1	0.690606	0.0028322	0.414	0.412	1
Tax1bp1	0.464733	0.00210462	0.59	0.607	1
Pkn2	0.987319	0.000312139	0.259	0.259	1
Hnrnpul2	0.917237	1.92211e-05	0.259	0.258	1
Ndufb4	0.167301	-0.00299178	0.24	0.257	1
Nedd4	0.533213	-0.00304744	0.368	0.358	1
mt-Nd4	3.84288e-05	-0.00311115	0.854	0.807	0.719925
Uqcrfs1	0.925045	-0.00341345	0.338	0.34	1
Ubxn1	0.597361	-0.00360673	0.267	0.26	1
Gas5	0.979777	-0.00423326	0.367	0.366	1
Rock1	0.656613	-0.00606932	0.289	0.293	1
Slc25a3	0.627685	-0.00672173	0.55	0.558	1
Ddx3x	0.0604683	-0.00762495	0.314	0.338	1
P4hb	0.83332	-0.00870309	0.264	0.265	1
Anp32b	0.0820051	-0.00930217	0.287	0.305	1
Immt	0.437103	-0.00936815	0.294	0.302	1
Atp5a1	0.241172	-0.00977247	0.58	0.599	1
Pdzk1ip1	4.62998e-05	-0.010142	0.531	0.466	0.86738
Ubxn2a	0.51645	-0.0110063	0.256	0.261	1
Eif5a	0.573266	-0.0117113	0.315	0.319	1
Wasl	0.0960074	-0.0121983	0.258	0.236	1
Atp5f1	0.202368	-0.0124656	0.435	0.454	1
Uqcr11	0.00972541	-0.0125964	0.43	0.469	1
Hspa4	0.401176	-0.0131229	0.294	0.302	1
Itgb6	0.193439	-0.0135228	0.289	0.269	1
Nop58	0.164061	-0.0139393	0.267	0.282	1
Arhgap5	0.115444	-0.0145195	0.448	0.464	1
Mdh2	0.33951	-0.014823	0.338	0.345	1
Rps27l	0.0489699	-0.0148758	0.331	0.355	1
Luc7l2	0.0845468	-0.0149756	0.312	0.33	1
Clta	0.108791	-0.015011	0.269	0.286	1
Top1	0.305881	-0.0170557	0.341	0.351	1
Snrnp70	0.00492438	-0.0171497	0.283	0.318	1
H2afj	0.000841173	-0.0202666	0.251	0.29	1
Rack1	0.0804776	-0.0205473	0.401	0.42	1
Atp5g3	0.0111697	-0.0210792	0.593	0.632	1
Macf1	0.0592097	-0.0225301	0.249	0.268	1
Hsp90b1	0.00113953	-0.0226647	0.63	0.677	1
Brd2	0.00166785	-0.0239219	0.238	0.271	1
Serinc1	0.0269368	-0.0246949	0.251	0.274	1
Ndufb10	0.0499487	-0.0254359	0.263	0.283	1
Csde1	0.0190472	-0.0272237	0.241	0.264	1
Ndufab1	0.00464534	-0.0280412	0.251	0.28	1
Tcf25	0.00818728	-0.0280928	0.36	0.392	1
Psmb4	0.00557089	-0.0291665	0.263	0.292	1
Ywhaz	0.0229146	-0.0294495	0.399	0.425	1
U2surp	0.0118124	-0.0298962	0.264	0.289	1
Nol7	0.00882729	-0.0306129	0.288	0.314	1
Idh2	0.00367723	-0.0306665	0.239	0.267	1
Acadl	0.0209678	-0.0312922	0.347	0.37	1
Pebp1	0.000900385	-0.0313178	0.308	0.345	1
Cyc1	0.0362903	-0.0328084	0.269	0.288	1
Atp6v0b	0.401572	-0.0330229	0.382	0.383	1
Phldb2	0.018126	-0.0338553	0.393	0.42	1
Srrm2	0.000135126	-0.0339356	0.498	0.544	1
Pdap1	5.76635e-05	-0.0341108	0.257	0.301	1
Pcbp2	0.00085596	-0.0343455	0.265	0.3	1
Mpc2	1.3357e-06	-0.0360707	0.409	0.478	0.0250231
Son	0.00139278	-0.036629	0.386	0.424	1
Ndufc2	0.000289053	-0.0366493	0.258	0.297	1
Skp1a	5.9301e-07	-0.0373311	0.291	0.35	0.0111094
Cd63	0.000568983	-0.0395774	0.772	0.795	1
Rnh1	0.00171591	-0.0403943	0.225	0.255	1
Ppig	0.00772358	-0.0404267	0.276	0.301	1
Hsp90ab1	5.38168e-10	-0.04071	0.875	0.914	1.0082e-05
Nipbl	0.000410201	-0.0407639	0.244	0.28	1
Srsf11	0.000425903	-0.0411429	0.296	0.333	1
Gng12	0.000426408	-0.0412251	0.253	0.29	1
Luc7l3	0.000908606	-0.0416928	0.285	0.319	1
Senp6	0.00121715	-0.0422213	0.277	0.309	1
Ndufa13	2.04962e-05	-0.0432174	0.388	0.44	0.383976
Bod1l	0.00468934	-0.0434339	0.234	0.26	1
Canx	0.000902903	-0.0451579	0.543	0.584	1
Naca	2.37991e-05	-0.0453431	0.251	0.296	0.445853
Pafah1b1	0.00213594	-0.0453634	0.314	0.344	1
Bclaf1	4.66412e-05	-0.0458406	0.284	0.329	0.873777
Metap2	2.56974e-06	-0.0466469	0.249	0.299	0.0481416
Ik	0.000449303	-0.0488303	0.219	0.252	1
Aff4	4.53849e-05	-0.0488704	0.219	0.259	0.850241
Nucks1	9.17439e-05	-0.0491872	0.281	0.322	1
Hnrnpd	1.22109e-05	-0.0511465	0.234	0.279	0.228759
Sf3b2	3.62489e-06	-0.051674	0.279	0.33	0.0679086
Sh3glb1	2.77934e-05	-0.0521078	0.228	0.269	0.520681
Ndufv2	1.07555e-07	-0.0522083	0.223	0.28	0.00201494
Matr3	1.98026e-06	-0.0526771	0.266	0.319	0.0370981
Sfpq	1.29214e-06	-0.0531665	0.328	0.385	0.024207
Atp5d	9.56703e-06	-0.0539548	0.434	0.487	0.179229
Atp5c1	3.76851e-07	-0.0542186	0.425	0.487	0.00705993
Cops9	3.37459e-07	-0.0545249	0.203	0.254	0.00632196
Minos1	1.53866e-07	-0.0562795	0.375	0.441	0.00288252
Afdn	3.40453e-07	-0.0569295	0.201	0.252	0.00637805
Cnbp	4.72072e-06	-0.057058	0.258	0.304	0.088438
Cfl2	2.28274e-08	-0.0576326	0.196	0.251	0.000427649
Atp5k	9.56435e-07	-0.0576968	0.328	0.383	0.0179178
Prpf40a	5.45505e-07	-0.0578764	0.227	0.278	0.0102195
Rpl12	6.24806e-06	-0.0585513	0.281	0.328	0.117051
Pdia3	6.82274e-06	-0.0596512	0.408	0.46	0.127817
Selenof	3.0391e-09	-0.0597367	0.197	0.257	5.69345e-05
Tpd52	3.20563e-06	-0.0602894	0.261	0.309	0.0600542
Kmt2a	3.20387e-07	-0.0607413	0.213	0.263	0.00600213
Ube2d3	3.61878e-06	-0.061058	0.264	0.309	0.0677943
Mrpl33	6.33273e-10	-0.0616279	0.199	0.263	1.18637e-05
Bzw1	1.18806e-08	-0.062002	0.213	0.271	0.00022257
Hnrnpu	7.09763e-08	-0.062686	0.459	0.523	0.00132967
Arhgdia	7.11207e-08	-0.0626912	0.207	0.26	0.00133237
Calr	3.16176e-06	-0.0633401	0.484	0.533	0.0592323
Srsf5	3.16336e-09	-0.0636441	0.246	0.309	5.92625e-05
Ndufa5	1.10281e-06	-0.0637243	0.341	0.39	0.02066
Psmb1	2.7409e-08	-0.0645171	0.22	0.278	0.000513481
Atp5j2	7.62393e-07	-0.0651847	0.459	0.514	0.0142827
Ndufa12	1.41736e-09	-0.0664006	0.278	0.344	2.65529e-05
Wwc1	7.74324e-08	-0.0672242	0.212	0.265	0.00145062
Tmem30a	2.0749e-08	-0.0679311	0.235	0.292	0.000388711
Atpif1	3.63607e-05	-0.068987	0.569	0.611	0.681181
Rpl35a	2.51393e-10	-0.0704801	0.217	0.282	4.70959e-06
Oaz1	2.8183e-12	-0.0705471	0.28	0.361	5.2798e-08
Ash1l	9.0347e-10	-0.0709329	0.266	0.334	1.69256e-05
Hnrnpm	4.2137e-09	-0.0713607	0.259	0.321	7.89394e-05
Psma2	2.72371e-11	-0.0714531	0.198	0.265	5.10259e-07
Rpl22l1	3.58099e-10	-0.071945	0.203	0.266	6.70863e-06
Pnisr	1.23191e-08	-0.072838	0.307	0.37	0.000230785
Ndufb6	1.52192e-09	-0.0739508	0.281	0.347	2.85117e-05
Ndufb8	2.12521e-09	-0.0747623	0.301	0.366	3.98136e-05
Acin1	4.03787e-06	-0.0750776	0.347	0.393	0.0756454
Neat1	0.0121687	-0.0757094	0.637	0.66	1
Sec62	1.1731e-07	-0.0757814	0.439	0.498	0.00219768
Cyb5r3	7.81244e-08	-0.0758406	0.252	0.305	0.00146358
Edf1	1.87465e-10	-0.0762628	0.238	0.305	3.51198e-06
Zc3h15	9.17723e-09	-0.0766045	0.25	0.307	0.000171926
Rab2a	5.4011e-10	-0.0772024	0.215	0.277	1.01184e-05
Rpl4	2.56138e-06	-0.0777784	0.584	0.626	0.0479849
Fkbp2	8.84685e-10	-0.0779422	0.238	0.302	1.65737e-05
Eef1b2	9.28771e-12	-0.0788155	0.26	0.334	1.73996e-07
Met	1.20732e-09	-0.0794054	0.204	0.262	2.26178e-05
Cox17	3.0909e-12	-0.0794552	0.262	0.339	5.7905e-08
Smdt1	9.78565e-13	-0.0800352	0.235	0.313	1.83324e-08
Rpl30	2.07478e-12	-0.080206	0.212	0.284	3.8869e-08
Tmem176b	9.21408e-05	-0.0814022	0.515	0.554	1
Serbp1	7.90081e-11	-0.0814706	0.512	0.586	1.48014e-06
Rab14	2.01623e-12	-0.0815328	0.227	0.299	3.7772e-08
Jun	5.46621e-62	-0.0815913	0.514	0.73	1.02404e-57
Arfgef1	4.64237e-11	-0.0816799	0.214	0.279	8.69702e-07
Serf2	8.80357e-15	-0.0818521	0.176	0.251	1.64926e-10
Ndufb5	1.46381e-11	-0.0828311	0.223	0.291	2.7423e-07
2410015M20Rik	7.53778e-15	-0.0828908	0.186	0.263	1.41213e-10
Tm9sf3	8.22707e-12	-0.0834937	0.253	0.325	1.54126e-07
Hnrnpa3	7.05332e-13	-0.0841596	0.273	0.35	1.32137e-08
Kif5b	3.7325e-09	-0.0842048	0.387	0.451	6.99246e-05
Cox7c	3.801e-13	-0.0853495	0.58	0.663	7.1208e-09
Ndufb7	2.24008e-12	-0.0859425	0.261	0.337	4.19656e-08
Rps10	6.96603e-11	-0.0861101	0.341	0.411	1.30502e-06
Mcl1	2.29944e-10	-0.0880271	0.328	0.395	4.30777e-06
Rpl23	2.06697e-12	-0.0884668	0.358	0.44	3.87226e-08
Usmg5	3.17739e-17	-0.0889002	0.332	0.434	5.95252e-13
Atp5o	6.10036e-13	-0.0894926	0.364	0.446	1.14284e-08
2010107E04Rik	3.37701e-12	-0.089785	0.414	0.49	6.32649e-08
Rpl5	1.23477e-13	-0.0898315	0.349	0.435	2.31322e-09
Cfdp1	1.4801e-14	-0.0903318	0.195	0.271	2.77281e-10
Ndufb2	4.88911e-18	-0.0910382	0.251	0.347	9.15926e-14
Rpl22	6.01141e-16	-0.0921307	0.322	0.415	1.12618e-11
Hnrnpab	2.12178e-11	-0.0924226	0.312	0.385	3.97494e-07
Atxn7l3b	1.55888e-11	-0.0932521	0.223	0.291	2.92041e-07
Rpl27a	1.6646e-15	-0.0937214	0.195	0.273	3.11846e-11
Atp5b	3.13164e-12	-0.0943966	0.647	0.706	5.86682e-08
Arf1	6.71917e-17	-0.0949292	0.205	0.29	1.25877e-12
Rbm39	4.97598e-15	-0.0959508	0.478	0.568	9.32199e-11
Rps25	5.76116e-15	-0.0975582	0.372	0.46	1.07929e-10
Chka	1.03143e-06	-0.098619	0.322	0.369	0.0193228
Rpl36a	2.63123e-18	-0.0991557	0.207	0.298	4.92935e-14
Morf4l1	1.96065e-23	-0.100203	0.162	0.261	3.67309e-19
Fxyd2	4.96759e-10	-0.100303	0.895	0.707	9.30629e-06
Eef1g	1.11323e-14	-0.100538	0.277	0.359	2.08552e-10
Rpl36	8.45638e-15	-0.101068	0.334	0.419	1.58422e-10
Hadha	1.71817e-16	-0.101537	0.206	0.289	3.21881e-12
Pak2	5.97168e-17	-0.101677	0.192	0.275	1.11873e-12
Col18a1	2.76946e-16	-0.102245	0.23	0.315	5.18831e-12
Ndufa3	5.52325e-17	-0.102382	0.356	0.452	1.03473e-12
Msn	4.46316e-06	-0.10245	0.279	0.317	0.0836128
Os9	9.19815e-16	-0.102659	0.203	0.282	1.72318e-11
Ndufb11	3.01401e-19	-0.104689	0.188	0.278	5.64644e-15
Ube2b	2.45484e-15	-0.104915	0.218	0.297	4.59889e-11
Btf3	4.08267e-26	-0.105508	0.146	0.251	7.64848e-22
Rps19	4.06243e-13	-0.10636	0.449	0.527	7.61056e-09
Fau	1.47928e-19	-0.107532	0.314	0.415	2.77128e-15
Ddx6	2.64767e-18	-0.108266	0.205	0.292	4.96015e-14
Hsbp1	1.4908e-19	-0.108901	0.169	0.257	2.79287e-15
Actn4	6.60558e-15	-0.109717	0.308	0.391	1.23749e-10
Rpl18a	3.56742e-19	-0.109758	0.316	0.423	6.6832e-15
Uqcrb	5.69292e-19	-0.10986	0.361	0.466	1.06651e-14
Pdia6	1.73036e-17	-0.110018	0.192	0.276	3.24166e-13
Arglu1	5.45958e-16	-0.110571	0.308	0.397	1.0228e-11
Rpl38	8.64181e-16	-0.111295	0.391	0.478	1.61896e-11
Samd9l	6.12818e-19	-0.111447	0.208	0.299	1.14805e-14
Sfr1	3.15038e-17	-0.11166	0.173	0.253	5.90192e-13
Rpl7a	3.47212e-23	-0.112557	0.212	0.317	6.50466e-19
Srrm1	2.80157e-16	-0.112848	0.3	0.387	5.24846e-12
Ndufa1	7.59955e-21	-0.114246	0.27	0.369	1.4237e-16
Cox5a	4.04625e-16	-0.115294	0.432	0.519	7.58024e-12
Mrpl52	3.19944e-25	-0.11558	0.153	0.255	5.99384e-21
Hnrnpk	1.01862e-20	-0.115634	0.246	0.345	1.90829e-16
Ndufb9	3.91086e-18	-0.115707	0.35	0.445	7.32661e-14
Rps17	5.96581e-24	-0.116017	0.261	0.374	1.11763e-19
Smarca5	1.56207e-21	-0.117817	0.219	0.317	2.92639e-17
Strbp	9.89774e-18	-0.11802	0.215	0.3	1.85424e-13
Csnk1a1	3.2469e-17	-0.11837	0.357	0.45	6.08275e-13
Gnb2	2.82458e-24	-0.118598	0.178	0.281	5.29157e-20
Ywhab	1.53695e-21	-0.118825	0.279	0.384	2.87933e-17
Rps15	4.0143e-17	-0.120139	0.348	0.437	7.52038e-13
Ndufc1	5.87302e-21	-0.120144	0.353	0.458	1.10025e-16
Rpl27	3.94932e-28	-0.120547	0.292	0.422	7.39866e-24
Ubl5	5.56668e-28	-0.120606	0.188	0.304	1.04286e-23
Hmgn1	1.80774e-21	-0.121181	0.284	0.388	3.38662e-17
Ctnnb1	1.33389e-20	-0.121276	0.253	0.353	2.49892e-16
Dst	3.75888e-17	-0.122237	0.258	0.346	7.04188e-13
Fnbp1l	8.52596e-25	-0.122442	0.173	0.275	1.59725e-20
Atp6v1e1	5.76316e-12	-0.122478	0.305	0.371	1.07967e-07
Ndufa4	2.47891e-20	-0.122509	0.548	0.649	4.64399e-16
Ssb	5.28137e-20	-0.123234	0.295	0.396	9.89412e-16
Atp5e	2.94103e-22	-0.123643	0.44	0.552	5.50972e-18
AC121965.1	1.18241e-27	-0.123925	0.253	0.37	2.21513e-23
Rps12	3.1098e-16	-0.124935	0.368	0.457	5.82589e-12
Rab11a	8.6711e-23	-0.125339	0.177	0.273	1.62444e-18
Kcnj16	8.38345e-13	-0.125907	0.318	0.388	1.57056e-08
Bsg	5.00103e-25	-0.126004	0.279	0.394	9.36893e-21
Rps16	9.26003e-30	-0.126383	0.156	0.269	1.73477e-25
Ktn1	8.06253e-19	-0.126496	0.249	0.34	1.51044e-14
Sat1	2.96574e-16	-0.126731	0.405	0.496	5.55601e-12
Ndufa11	3.11863e-29	-0.127059	0.186	0.302	5.84244e-25
Eif1a	2.10792e-27	-0.127524	0.182	0.292	3.94899e-23
Drap1	8.4153e-29	-0.127782	0.166	0.276	1.57652e-24
Rps11	1.30649e-29	-0.128024	0.228	0.353	2.44758e-25
Tbca	4.23911e-30	-0.128249	0.162	0.275	7.94155e-26
Hnrnpa0	6.13125e-29	-0.128456	0.198	0.314	1.14863e-24
Cox6a1	4.02648e-16	-0.130107	0.695	0.769	7.54321e-12
Rpl10	2.27241e-26	-0.130475	0.221	0.335	4.25714e-22
Rps23	3.28566e-28	-0.131233	0.213	0.33	6.15535e-24
Rps20	2.20268e-23	-0.1318	0.364	0.473	4.1265e-19
Eef1a1	4.18111e-20	-0.132505	0.436	0.542	7.83288e-16
Rps21	4.06976e-26	-0.133316	0.373	0.494	7.62428e-22
Rhoa	1.17315e-26	-0.134217	0.231	0.344	2.19779e-22
Hp1bp3	2.79649e-28	-0.134784	0.198	0.311	5.23895e-24
Purb	7.33182e-26	-0.134866	0.202	0.31	1.37354e-21
Slk	1.01655e-20	-0.135369	0.264	0.362	1.9044e-16
1700011H14Rik	9.90362e-30	-0.135458	0.16	0.273	1.85534e-25
Tmed10	2.20158e-39	-0.136755	0.128	0.257	4.12444e-35
Slc25a4	2.10666e-26	-0.137017	0.338	0.463	3.94661e-22
Net1	1.0669e-21	-0.138148	0.235	0.33	1.99873e-17
Rrp1	1.00182e-28	-0.138661	0.216	0.334	1.8768e-24
Fkbp3	1.21463e-34	-0.139046	0.168	0.294	2.27549e-30
Bicc1	4.99337e-23	-0.139846	0.215	0.315	9.35458e-19
Rtn3	4.2105e-27	-0.140623	0.254	0.368	7.88796e-23
Ybx3	2.19716e-28	-0.140854	0.176	0.288	4.11616e-24
Reep5	2.65572e-35	-0.140992	0.136	0.257	4.97523e-31
Paxbp1	2.00963e-27	-0.141467	0.179	0.289	3.76485e-23
Lad1	1.37705e-32	-0.141799	0.148	0.266	2.57977e-28
Rpl39	1.19083e-24	-0.141817	0.286	0.393	2.23091e-20
Camk2n1	1.27652e-22	-0.142562	0.274	0.375	2.39143e-18
Tpm3	7.59479e-21	-0.144956	0.455	0.55	1.42281e-16
Rpl13	3.31927e-19	-0.145149	0.65	0.719	6.21831e-15
Myh9	6.54569e-27	-0.145434	0.246	0.362	1.22627e-22
Aes	4.08858e-30	-0.146641	0.24	0.363	7.65954e-26
Rplp2	1.15625e-28	-0.146899	0.345	0.468	2.16611e-24
Uqcrh	8.02919e-32	-0.147079	0.331	0.466	1.50419e-27
Cbx1	1.02788e-34	-0.148507	0.17	0.295	1.92564e-30
Rhob	1.22708e-38	-0.148514	0.176	0.314	2.29881e-34
Fus	3.29226e-32	-0.148514	0.246	0.374	6.16771e-28
Rps28	3.47922e-29	-0.148582	0.326	0.448	6.51797e-25
Sub1	1.19591e-41	-0.148902	0.141	0.275	2.24041e-37
Rpl8	1.03065e-24	-0.149046	0.42	0.53	1.93082e-20
Pabpc1	1.49066e-22	-0.149205	0.614	0.698	2.79261e-18
Ywhae	7.91307e-29	-0.149288	0.361	0.482	1.48243e-24
Set	3.25658e-32	-0.149825	0.263	0.395	6.10087e-28
Rsrc2	8.72587e-35	-0.15043	0.22	0.352	1.6347e-30
Cnn3	1.81546e-39	-0.151179	0.133	0.261	3.40108e-35
Arf5	2.36089e-39	-0.153245	0.151	0.283	4.42288e-35
Arpc3	1.013e-39	-0.153723	0.139	0.269	1.89775e-35
Dek	3.38818e-39	-0.15504	0.202	0.342	6.34742e-35
Myl12b	7.75953e-34	-0.157584	0.163	0.282	1.45367e-29
Rpl34	1.3621e-36	-0.157669	0.228	0.363	2.55176e-32
Rpl6	3.68182e-31	-0.158039	0.333	0.461	6.89753e-27
Sept7	1.33606e-34	-0.158304	0.225	0.357	2.50297e-30
Mgst3	1.94808e-42	-0.15866	0.136	0.271	3.64953e-38
Ctsl	0.0266017	-0.158958	0.607	0.595	1
Cast	1.88091e-37	-0.158981	0.19	0.323	3.5237e-33
Rps2	5.11637e-29	-0.159719	0.412	0.539	9.58501e-25
Rpl17	8.85413e-32	-0.159958	0.394	0.52	1.65873e-27
Tmem59	8.2851e-35	-0.16009	0.182	0.307	1.55213e-30
Stat3	2.25996e-38	-0.160387	0.18	0.314	4.2338e-34
Cox5b	9.93789e-26	-0.16235	0.486	0.591	1.86176e-21
Pfdn5	1.22296e-31	-0.162584	0.223	0.344	2.2911e-27
Cox7a2	6.59645e-27	-0.1636	0.46	0.573	1.23578e-22
Arpc5	9.9848e-43	-0.163698	0.199	0.347	1.87055e-38
Rps13	9.09206e-38	-0.164091	0.257	0.397	1.70331e-33
Rpl19	4.23474e-39	-0.16448	0.265	0.41	7.93336e-35
Hnrnpc	6.17427e-36	-0.164826	0.264	0.398	1.15669e-31
Rplp1	1.31563e-29	-0.164919	0.588	0.7	2.46469e-25
Ralbp1	8.00413e-39	-0.166191	0.165	0.297	1.49949e-34
Gnb1	4.74324e-43	-0.167301	0.142	0.276	8.88599e-39
Ttc3	8.4759e-42	-0.1676	0.145	0.278	1.58788e-37
Rps15a	2.14452e-34	-0.169872	0.294	0.428	4.01754e-30
Clint1	1.95381e-27	-0.170004	0.225	0.335	3.66026e-23
Ywhah	2.53473e-41	-0.170358	0.173	0.311	4.74856e-37
Sec63	3.0653e-35	-0.17129	0.183	0.307	5.74254e-31
Sem1	2.9439e-42	-0.172467	0.241	0.388	5.5151e-38
Atp5h	2.08891e-40	-0.173625	0.343	0.497	3.91337e-36
Atp5g1	2.51638e-35	-0.174723	0.288	0.421	4.71418e-31
Rps3a1	3.23633e-42	-0.174953	0.241	0.392	6.06295e-38
Cbx5	5.02273e-60	-0.176072	0.114	0.277	9.40957e-56
Rpl31	1.39826e-41	-0.177025	0.264	0.411	2.6195e-37
Rps7	9.50804e-41	-0.17749	0.287	0.434	1.78124e-36
Ptms	8.57086e-35	-0.177951	0.445	0.571	1.60567e-30
Rpl37	7.78356e-38	-0.178096	0.324	0.462	1.45817e-33
Chd4	2.54594e-33	-0.178151	0.45	0.58	4.76957e-29
Sf3b1	1.8424e-39	-0.178265	0.271	0.415	3.45155e-35
Sri	1.63406e-58	-0.178303	0.106	0.263	3.06124e-54
Ndufa7	1.49311e-49	-0.178992	0.189	0.346	2.79719e-45
Wnk1	1.00665e-20	-0.179274	0.176	0.261	1.88586e-16
Rps29	4.50991e-44	-0.179433	0.315	0.472	8.44887e-40
Gadd45g	2.4552e-30	-0.179516	0.284	0.413	4.59958e-26
Pgrmc1	6.75866e-44	-0.182631	0.134	0.269	1.26617e-39
Dynll1	1.87496e-51	-0.183867	0.187	0.351	3.51255e-47
1810037I17Rik	1.34008e-60	-0.184477	0.106	0.268	2.5105e-56
Dync1i2	5.83572e-45	-0.184854	0.239	0.392	1.09326e-40
Rpl26	6.52548e-40	-0.185181	0.379	0.528	1.22248e-35
Rps8	1.22959e-34	-0.185198	0.577	0.689	2.30352e-30
Rpl18	2.99749e-37	-0.185993	0.317	0.456	5.6155e-33
Rpl32	1.59187e-32	-0.186983	0.465	0.587	2.98221e-28
Elob	1.38789e-52	-0.187422	0.242	0.411	2.60007e-48
Rpl37a	2.2551e-48	-0.188174	0.322	0.491	4.22471e-44
Atrx	5.09622e-35	-0.18916	0.361	0.491	9.54725e-31
Atp5j	1.79416e-44	-0.190109	0.358	0.518	3.36117e-40
Cox4i1	3.15589e-36	-0.191818	0.719	0.814	5.91225e-32
Ahnak	2.0514e-38	-0.192209	0.253	0.396	3.84309e-34
Ywhaq	1.0985e-75	-0.192682	0.084	0.264	2.05793e-71
Rps24	1.66743e-37	-0.192755	0.514	0.646	3.12377e-33
Prdx2	6.3346e-55	-0.193294	0.171	0.334	1.18672e-50
Adamts1	3.6129e-22	-0.193675	0.247	0.344	6.7684e-18
Anp32a	4.65912e-44	-0.194324	0.253	0.405	8.72839e-40
Rps26	4.93064e-45	-0.194937	0.365	0.522	9.23706e-41
Rps27a	2.44319e-46	-0.195773	0.338	0.501	4.57707e-42
Tpm4	2.03866e-53	-0.198246	0.161	0.322	3.81923e-49
Ppib	4.40172e-58	-0.199063	0.15	0.315	8.24618e-54
Rpl14	3.59942e-36	-0.199365	0.524	0.647	6.74315e-32
B2m	4.56428e-17	-0.199917	0.29	0.37	8.55073e-13
Cstb	2.46562e-55	-0.200432	0.279	0.46	4.61909e-51
Atp6v1a	5.44156e-20	-0.201654	0.315	0.402	1.01942e-15
Rpl7	3.69233e-56	-0.202193	0.25	0.425	6.91721e-52
Zfand5	7.0156e-39	-0.203334	0.289	0.431	1.3143e-34
Nfkbiz	5.75996e-39	-0.206136	0.193	0.327	1.07907e-34
Rpl11	1.26573e-52	-0.209596	0.448	0.616	2.37121e-48
Map3k2	4.45796e-57	-0.210313	0.128	0.287	8.35154e-53
Cdc42	4.24978e-57	-0.211158	0.298	0.48	7.96155e-53
Rpl3	6.68991e-41	-0.211316	0.387	0.531	1.25329e-36
Chmp2a	4.3993e-60	-0.211965	0.162	0.33	8.24166e-56
Litaf	1.6443e-54	-0.212426	0.117	0.267	3.08044e-50
Bag1	5.92758e-54	-0.212657	0.284	0.459	1.11047e-49
Mgst1	1.48583e-53	-0.213498	0.143	0.299	2.78355e-49
Rpl23a	2.95297e-60	-0.214591	0.315	0.505	5.5321e-56
Rps18	5.541e-56	-0.215142	0.257	0.428	1.03805e-51
Pfn1	4.74152e-51	-0.216425	0.304	0.469	8.88276e-47
Cd81	2.18878e-52	-0.216779	0.19	0.349	4.10046e-48
Rps5	1.06607e-44	-0.217399	0.371	0.524	1.99718e-40
Ppp1r15a	2.2407e-56	-0.218218	0.136	0.295	4.19773e-52
Erbin	7.75684e-53	-0.218266	0.236	0.399	1.45317e-48
Ccnl1	1.56294e-54	-0.218647	0.256	0.43	2.928e-50
Atp6v1f	3.41296e-53	-0.218944	0.237	0.403	6.39384e-49
Hmgb1	4.09223e-73	-0.22016	0.25	0.457	7.66638e-69
Ddx5	6.59454e-54	-0.220602	0.56	0.714	1.23542e-49
Txnip	8.31119e-72	-0.223292	0.168	0.367	1.55702e-67
Acsl4	7.05789e-68	-0.224594	0.122	0.296	1.32222e-63
S100a10	1.04831e-30	-0.226325	0.561	0.668	1.9639e-26
Cfl1	5.41114e-61	-0.227063	0.297	0.48	1.01372e-56
Rplp0	1.40395e-45	-0.227571	0.396	0.546	2.63016e-41
App	1.29432e-51	-0.227723	0.634	0.763	2.42478e-47
Lamb1	2.90699e-72	-0.229029	0.11	0.288	5.44595e-68
Pnrc1	7.1991e-57	-0.229305	0.254	0.436	1.34868e-52
Pdcd4	6.11336e-90	-0.23115	0.072	0.266	1.14528e-85
Gadd45a	5.99825e-47	-0.231873	0.285	0.446	1.12371e-42
Cox7b	2.59806e-52	-0.232024	0.392	0.556	4.86721e-48
Capns1	2.84826e-64	-0.232294	0.207	0.388	5.33592e-60
Cxadr	6.48626e-76	-0.232296	0.098	0.279	1.21514e-71
Slc25a5	3.6913e-48	-0.232965	0.514	0.665	6.91528e-44
Rps4x	8.8421e-66	-0.23469	0.243	0.434	1.65648e-61
Psma7	2.54925e-63	-0.234726	0.335	0.524	4.77577e-59
Elovl7	1.45895e-78	-0.236426	0.11	0.299	2.73319e-74
Selenow	8.1793e-84	-0.239479	0.102	0.297	1.53231e-79
Rpl9	8.20517e-74	-0.240552	0.255	0.46	1.53716e-69
Itgb1	2.41082e-57	-0.240598	0.316	0.491	4.51642e-53
Atp6v0a4	1.23086e-52	-0.240721	0.189	0.345	2.3059e-48
Myl6	1.43755e-70	-0.242772	0.27	0.468	2.6931e-66
Hnrnpa2b1	2.76484e-60	-0.242915	0.538	0.695	5.17964e-56
Ezr	3.06316e-60	-0.24411	0.572	0.731	5.73853e-56
Syne2	4.95236e-39	-0.245169	0.563	0.673	9.27775e-35
Ppia	3.77714e-83	-0.24554	0.261	0.487	7.0761e-79
Chmp4b	1.36084e-75	-0.246914	0.191	0.39	2.54939e-71
Slc38a2	1.74436e-61	-0.248703	0.172	0.342	3.26788e-57
Wsb1	6.87422e-94	-0.251955	0.086	0.291	1.28782e-89
Ier2	1.12972e-71	-0.253293	0.121	0.305	2.11643e-67
Adgrg1	1.62433e-83	-0.256283	0.191	0.407	3.04302e-79
Cox8a	7.31325e-70	-0.257535	0.364	0.56	1.37006e-65
Rpl21	1.23079e-81	-0.258817	0.295	0.507	2.30576e-77
Rpl41	3.10834e-77	-0.261583	0.496	0.69	5.82317e-73
Id2	2.6018e-31	-0.261937	0.4	0.509	4.87421e-27
Tceal9	1.11445e-93	-0.261983	0.138	0.358	2.08781e-89
Cd2ap	4.04447e-63	-0.262025	0.46	0.645	7.57691e-59
Lmna	3.56114e-44	-0.264689	0.213	0.35	6.67144e-40
Wls	6.28872e-94	-0.267621	0.169	0.394	1.17813e-89
Lrrfip1	1.13659e-107	-0.268743	0.054	0.267	2.12928e-103
Rps3	1.81764e-62	-0.270342	0.496	0.662	3.40517e-58
Tagln2	1.28189e-63	-0.270505	0.263	0.44	2.4015e-59
Laptm4a	1.769e-94	-0.272797	0.194	0.422	3.31405e-90
Dstn	2.61317e-85	-0.273061	0.212	0.424	4.89551e-81
Ubc	7.23185e-71	-0.27458	0.699	0.829	1.35481e-66
Rps27	6.33071e-85	-0.274641	0.317	0.536	1.186e-80
Cox6b1	8.72987e-75	-0.275216	0.45	0.641	1.63545e-70
Tnfrsf12a	7.61523e-63	-0.275706	0.321	0.505	1.42664e-58
Arl4c	5.29702e-126	-0.275898	0.031	0.255	9.92344e-122
Vmp1	1.08798e-61	-0.278708	0.4	0.569	2.03822e-57
Fermt2	7.52089e-88	-0.279786	0.145	0.354	1.40896e-83
F2rl1	1.48685e-124	-0.284933	0.048	0.279	2.78546e-120
Ivns1abp	6.96782e-76	-0.284982	0.359	0.554	1.30535e-71
Eif1	3.25326e-84	-0.285067	0.407	0.619	6.09466e-80
Trib1	2.30673e-97	-0.286204	0.12	0.341	4.32143e-93
Cox6c	4.51025e-82	-0.286412	0.653	0.811	8.4495e-78
Rabac1	5.63087e-99	-0.290443	0.16	0.387	1.05489e-94
Car2	0.0967712	-0.291785	0.478	0.403	1
Cystm1	8.95831e-66	-0.293219	0.352	0.532	1.67825e-61
Gls	3.76297e-101	-0.297767	0.156	0.386	7.04954e-97
Ptbp3	1.12108e-98	-0.30327	0.176	0.404	2.10023e-94
Dsp	6.70895e-134	-0.30399	0.023	0.254	1.25685e-129
Tuba1a	3.88536e-131	-0.304025	0.024	0.251	7.27883e-127
Hspb1	6.51764e-66	-0.30432	0.088	0.251	1.22102e-61
Ptp4a2	1.09935e-94	-0.306393	0.189	0.413	2.05953e-90
Nfe2l1	8.23625e-124	-0.306516	0.15	0.411	1.54298e-119
St14	1.776e-154	-0.30788	0.021	0.277	3.32716e-150
Fosb	2.53622e-73	-0.308039	0.253	0.468	4.75135e-69
Nfe2l2	1.1514e-113	-0.311642	0.191	0.444	2.15704e-109
Clic1	3.0031e-95	-0.312482	0.216	0.439	5.62601e-91
Ehf	2.29484e-144	-0.314882	0.016	0.256	4.29915e-140
Rps9	3.51079e-92	-0.318112	0.454	0.666	6.57712e-88
Bhlhe40	1.87622e-103	-0.319948	0.197	0.436	3.51491e-99
Bcam	5.08842e-127	-0.321887	0.057	0.296	9.53265e-123
Ifrd1	3.31264e-44	-0.322697	0.307	0.448	6.20591e-40
Tuba1c	6.39442e-109	-0.324159	0.204	0.453	1.19793e-104
H2-D1	4.16223e-97	-0.32561	0.182	0.409	7.79751e-93
Atp6v0e	6.06538e-115	-0.327092	0.118	0.358	1.13629e-110
Las1l	3.41499e-55	-0.327482	0.148	0.299	6.39763e-51
Ctnna1	1.91179e-110	-0.33273	0.285	0.533	3.58156e-106
H2-K1	1.24698e-94	-0.334487	0.243	0.472	2.33609e-90
Gnas	7.19122e-109	-0.33625	0.372	0.61	1.3472e-104
Cebpd	1.69707e-113	-0.336284	0.043	0.256	3.17929e-109
Cd47	1.82204e-131	-0.336741	0.108	0.368	3.4134e-127
Arpc2	2.71037e-115	-0.337122	0.261	0.521	5.07761e-111
Aif1l	1.00305e-158	-0.338316	0.037	0.307	1.87912e-154
Ubb	3.45093e-109	-0.338552	0.655	0.829	6.46496e-105
Ptma	1.95689e-89	-0.339863	0.578	0.741	3.66603e-85
Aldoa	2.01206e-119	-0.34389	0.345	0.602	3.7694e-115
Paqr5	1.06129e-145	-0.344186	0.084	0.355	1.98822e-141
Cdh16	4.25821e-87	-0.344861	0.439	0.63	7.97734e-83
Sytl2	1.74348e-146	-0.346809	0.039	0.295	3.26624e-142
Tspo	8.99166e-129	-0.347952	0.149	0.415	1.6845e-124
Tfcp2l1	4.2693e-113	-0.348769	0.127	0.363	7.9981e-109
Itga6	2.28437e-112	-0.350482	0.177	0.419	4.27954e-108
Rps14	1.75631e-110	-0.356877	0.405	0.648	3.29027e-106
Zfp36l1	1.87067e-92	-0.356979	0.537	0.725	3.50451e-88
Itgav	6.06332e-118	-0.361755	0.196	0.448	1.1359e-113
Rtn4	1.36375e-103	-0.367549	0.283	0.518	2.55484e-99
Phlda1	8.82979e-100	-0.368218	0.074	0.279	1.65417e-95
Krt8	9.8654e-83	-0.371743	0.445	0.652	1.84818e-78
Cdkn1a	2.57783e-111	-0.373131	0.109	0.342	4.82932e-107
Spint2	3.81881e-163	-0.373967	0.198	0.507	7.15415e-159
Actg1	1.07764e-127	-0.374982	0.277	0.545	2.01885e-123
H3f3b	1.4125e-143	-0.384835	0.382	0.683	2.64618e-139
Anxa5	8.07398e-156	-0.404766	0.136	0.432	1.51258e-151
Arpc1b	2.26109e-162	-0.40484	0.085	0.375	4.23593e-158
Tmsb10	4.61681e-182	-0.414479	0.079	0.395	8.64913e-178
Tsc22d1	2.76283e-117	-0.423381	0.507	0.731	5.17589e-113
Gadd45b	2.31083e-166	-0.427527	0.048	0.331	4.32911e-162
Junb	4.48569e-161	-0.43498	0.186	0.5	8.4035e-157
Tpm1	5.44707e-124	-0.441959	0.175	0.429	1.02045e-119
Slc5a3	9.04678e-158	-0.456007	0.054	0.326	1.69482e-153
Pkm	2.20065e-245	-0.459671	0.046	0.416	4.1227e-241
Igfbp7	2.1071e-107	-0.461148	0.633	0.782	3.94744e-103
Wfdc15b	3.15977e-140	-0.466575	0.021	0.258	5.91952e-136
Anxa2	2.74541e-139	-0.476649	0.148	0.423	5.14325e-135
Calm1	1.44923e-173	-0.485762	0.48	0.759	2.71498e-169
Iqgap1	3.51125e-234	-0.493509	0.17	0.548	6.57798e-230
Clcnkb	3.10435e-233	-0.503507	0.037	0.39	5.81568e-229
Zfp36	1.0815e-150	-0.504253	0.211	0.502	2.02609e-146
Aplp2	6.27114e-238	-0.51417	0.24	0.618	1.17484e-233
Ldhb	3.44867e-135	-0.517403	0.609	0.782	6.46073e-131
Cdh1	5.84351e-238	-0.522799	0.104	0.477	1.09472e-233
Actb	8.27723e-193	-0.523423	0.762	0.92	1.55066e-188
Plet1	1.65919e-176	-0.52477	0.021	0.304	3.10833e-172
Cst3	2.09451e-192	-0.528982	0.202	0.538	3.92386e-188
Myl12a	3.18365e-230	-0.533135	0.201	0.57	5.96426e-226
Sox4	6.33467e-233	-0.537978	0.105	0.481	1.18674e-228
Serinc3	1.19053e-168	-0.541729	0.217	0.515	2.23034e-164
Mrps6	8.12779e-223	-0.546461	0.088	0.441	1.52266e-218
Nfkbia	6.11406e-143	-0.551411	0.17	0.444	1.14541e-138
Kng2	1.02097e-244	-0.55694	0.031	0.394	1.91269e-240
Tspan8	3.38793e-282	-0.557288	0.031	0.433	6.34695e-278
Calm2	1.75956e-276	-0.567493	0.175	0.594	3.29636e-272
Krt7	8.30542e-265	-0.573432	0.031	0.416	1.55594e-260
S100a6	1.19387e-67	-0.582724	0.135	0.306	2.23659e-63
Klf6	2.45928e-241	-0.595129	0.512	0.821	4.60721e-237
Atp1a1	5.97126e-205	-0.597599	0.692	0.859	1.11866e-200
Sfn	5.4975e-195	-0.599155	0.113	0.446	1.0299e-190
Nudt4	7.98001e-216	-0.606268	0.212	0.558	1.49497e-211
Tmem52b	2.66034e-198	-0.607948	0.022	0.329	4.98388e-194
Ier3	2.60005e-231	-0.616154	0.118	0.485	4.87093e-227
Itm2b	2.05278e-277	-0.645829	0.497	0.81	3.84568e-273
Fos	2.61585e-213	-0.669794	0.339	0.69	4.90053e-209
Tmem213	0	-0.685966	0.028	0.472	0
Cd9	0	-0.696637	0.065	0.567	0
Btg2	1.01788e-279	-0.697033	0.217	0.64	1.90689e-275
Hsd11b2	2.75162e-148	-0.709435	0.015	0.257	5.15488e-144
S100a1	0	-0.722626	0.191	0.623	0
Sh3bgrl3	2.96235e-271	-0.731244	0.106	0.508	5.54966e-267
Atp1b1	0	-0.752264	0.829	0.943	0
Sdc4	0	-0.768431	0.473	0.832	0
Krt18	2.04339e-276	-0.770957	0.06	0.461	3.82808e-272
Lgals3	4.07769e-285	-0.791709	0.206	0.617	7.63915e-281
Cldn7	0	-0.799352	0.042	0.586	0
Ctsd	7.23605e-293	-0.811549	0.336	0.701	1.3556e-288
Egr1	0	-0.815718	0.192	0.657	0
Tacstd2	0	-0.826749	0.032	0.498	0
Mal	0	-0.909893	0.052	0.664	0
Hbegf	5.02489e-241	-0.913751	0.307	0.652	9.41364e-237
S100a11	0	-0.923202	0.276	0.787	0
Epcam	0	-0.924221	0.06	0.693	0
Slc12a3	5.87529e-109	-0.928348	0.075	0.283	1.10068e-104
Ly6e	0	-1.04241	0.194	0.659	0
Atf3	0	-1.06897	0.284	0.716	0
Slc12a1	1.93257e-95	-1.08319	0.084	0.274	3.62048e-91
Wfdc2	0	-1.14805	0.073	0.678	0
Lcn2	4.65041e-288	-1.20202	0.083	0.488	8.71208e-284
Mt2	1.15093e-251	-1.20205	0.226	0.584	2.15615e-247
Cd24a	0	-1.20228	0.109	0.771	0
Tmsb4x	3.42574e-300	-1.21188	0.172	0.584	6.41778e-296
Cldn4	0	-1.28575	0.137	0.614	0
Mt1	2.80168e-270	-1.31995	0.447	0.743	5.24866e-266
Defb1	0	-1.42434	0.13	0.696	0
Ly6a	0	-1.46568	0.332	0.81	0
S100g	5.75649e-55	-1.53941	0.227	0.363	1.07842e-50
Spp1	0	-1.77396	0.829	0.986	0
Umod	2.80647e-246	-1.80427	0.225	0.562	5.25763e-242
Klk1	2.76234e-182	-2.12181	0.199	0.488	5.17497e-178
Clu	0	-2.3515	0.347	0.867	0

## Sheet: DA-PT (IRI) vs Nephron (IRI)
gene	p_val	avg_logFC	pct.1	pct.2	p_val_adj
Cxcl1	4.70763e-145	1.31281	0.522	0.123	8.81928e-141
Cp	0	1.30553	0.842	0.08	0
Havcr1	7.4932e-277	1.28591	0.564	0.078	1.40378e-272
Akap12	0	1.21406	0.747	0.103	0
Ccl2	0	1.13114	0.311	0.013	0
Vcam1	0	1.03615	0.618	0.039	0
Igfbp7	7.92273e-172	1.00845	0.987	0.735	1.48424e-167
B2m	6.58668e-180	0.951712	0.853	0.327	1.23395e-175
Ankrd1	1.33026e-252	0.946648	0.493	0.059	2.4921e-248
Cxcl2	3.57655e-81	0.922437	0.407	0.115	6.70031e-77
Hspb1	1.68507e-163	0.901732	0.689	0.189	3.15681e-159
Sparc	1.55416e-195	0.831454	0.449	0.066	2.91156e-191
Tmem176b	1.39366e-106	0.806166	0.867	0.53	2.61089e-102
Vim	1.24115e-289	0.788099	0.449	0.041	2.32517e-285
Adamts1	1.38267e-116	0.780045	0.753	0.3	2.5903e-112
Lgals1	1.95807e-259	0.756572	0.629	0.1	3.66824e-255
Col4a1	4.11066e-144	0.75041	0.627	0.178	7.70092e-140
Ldhb	3.38146e-39	0.733031	0.789	0.738	6.33483e-35
Cyr61	2.04519e-80	0.72187	0.629	0.27	3.83146e-76
C3	0	0.714346	0.489	0.031	0
Cald1	3.63992e-206	0.713513	0.48	0.07	6.81903e-202
Tmsb10	7.63756e-144	0.706186	0.789	0.297	1.43082e-139
Nes	0	0.691058	0.482	0.037	0
Gc	0	0.681336	0.384	0.019	0
Cd74	7.20641e-74	0.666649	0.5	0.187	1.35005e-69
Plat	4.69981e-190	0.651876	0.52	0.09	8.80463e-186
S100a6	1.93242e-94	0.645555	0.658	0.246	3.62019e-90
Gpx1	3.28223e-64	0.645124	0.831	0.561	6.14893e-60
Cstb	1.57496e-75	0.638293	0.727	0.402	2.95053e-71
Dbi	4.2794e-70	0.610564	0.816	0.558	8.01703e-66
Slc6a6	2.96393e-86	0.605063	0.487	0.154	5.55263e-82
Ptma	3.3438e-95	0.59199	0.949	0.69	6.26428e-91
Tpm1	6.72458e-72	0.583848	0.713	0.352	1.25978e-67
Tmem176a	4.42013e-58	0.573418	0.724	0.45	8.28067e-54
Nfkbia	2.24181e-42	0.557328	0.644	0.366	4.1998e-38
Itga1	5.91485e-124	0.553715	0.562	0.154	1.10809e-119
Rps19	2.49108e-73	0.54482	0.818	0.494	4.66678e-69
Dcdc2a	3.21241e-96	0.530834	0.551	0.174	6.01812e-92
Actn1	1.32698e-99	0.50483	0.529	0.16	2.48596e-95
Id3	1.04605e-52	0.499184	0.404	0.149	1.95966e-48
Tmem252	2.46278e-66	0.497562	0.413	0.135	4.61377e-62
Cpe	6.27372e-204	0.497488	0.467	0.065	1.17532e-199
H2-K1	6.35709e-58	0.493531	0.722	0.403	1.19094e-53
Cited2	5.71899e-55	0.493191	0.513	0.217	1.0714e-50
Cdh6	4.39447e-202	0.468775	0.367	0.039	8.23259e-198
Cyba	3.27648e-67	0.467752	0.571	0.238	6.13817e-63
Anxa2	7.28858e-56	0.449204	0.68	0.342	1.36544e-51
Cd44	4.50561e-191	0.440545	0.336	0.034	8.44081e-187
Spink1	8.72318e-51	0.438073	0.564	0.246	1.6342e-46
Adamts5	1.88871e-289	0.433415	0.291	0.013	3.5383e-285
Npm1	2.03205e-43	0.433292	0.673	0.4	3.80684e-39
Krt20	6.34192e-72	0.432355	0.32	0.077	1.1881e-67
Rdh10	8.24016e-80	0.430589	0.436	0.126	1.54371e-75
Rps3	4.5404e-48	0.429934	0.836	0.612	8.50599e-44
Ptgds	5.79345e-240	0.428937	0.338	0.026	1.08534e-235
Zfp36l1	4.05079e-40	0.42529	0.889	0.67	7.58874e-36
Rbp1	0	0.424789	0.347	0.015	0
Cldn1	4.54551e-294	0.422666	0.373	0.025	8.51556e-290
Nedd4	7.11111e-47	0.417235	0.629	0.348	1.33219e-42
Dynll1	3.59289e-62	0.411991	0.636	0.297	6.73092e-58
Clic4	1.2083e-89	0.411112	0.507	0.153	2.26363e-85
2200002D01Rik	2.60079e-94	0.406547	0.462	0.126	4.87231e-90
Bicc1	1.31347e-51	0.406042	0.587	0.278	2.46066e-47
Rps9	5.68618e-46	0.405882	0.84	0.604	1.06525e-41
F3	1.7232e-35	0.40362	0.436	0.203	3.22824e-31
Palld	4.45683e-113	0.402117	0.358	0.067	8.34942e-109
Ctsl	1.77241e-32	0.392687	0.807	0.588	3.32043e-28
Dag1	7.28796e-37	0.392056	0.407	0.184	1.36533e-32
Tpt1	9.23276e-33	0.381178	0.707	0.484	1.72966e-28
Anxa3	4.63337e-98	0.380738	0.387	0.087	8.68016e-94
Gxylt2	0	0.376752	0.302	0.009	0
Timp2	1.48468e-86	0.371277	0.282	0.053	2.7814e-82
Sept11	9.60298e-60	0.36774	0.367	0.116	1.79902e-55
Rps2	2.8864e-39	0.367486	0.751	0.497	5.40739e-35
Cldn2	1.16327e-73	0.364437	0.409	0.118	2.17927e-69
Tpm4	1.98e-51	0.357639	0.578	0.27	3.70933e-47
Ier3	3.03202e-20	0.355703	0.571	0.389	5.68019e-16
Ncam1	1.79828e-132	0.350214	0.264	0.031	3.3689e-128
Hspa5	2.5413e-17	0.348843	0.798	0.684	4.76087e-13
Rpl13	4.36514e-39	0.343802	0.889	0.693	8.17766e-35
Cryab	6.81585e-64	0.34169	0.522	0.193	1.27688e-59
Gstm1	4.92695e-43	0.3412	0.391	0.155	9.23015e-39
Aoc1	7.54148e-79	0.338284	0.271	0.053	1.41282e-74
Itgb1	5.21883e-29	0.332883	0.676	0.439	9.77696e-25
Guca2b	4.99409e-21	0.332146	0.296	0.142	9.35593e-17
Fam213a	3.62262e-34	0.331664	0.389	0.175	6.78661e-30
Rpl4	1.24251e-34	0.331584	0.82	0.606	2.32772e-30
Filip1l	1.08395e-105	0.328582	0.296	0.048	2.03067e-101
Gnai2	2.47953e-45	0.326484	0.467	0.202	4.64514e-41
Cyb5r3	2.61936e-39	0.324385	0.553	0.28	4.90711e-35
Egr1	6.07961e-18	0.322076	0.711	0.538	1.13895e-13
Sox9	4.46672e-56	0.321603	0.371	0.119	8.36795e-52
Tcim	2.50281e-42	0.320525	0.336	0.121	4.68876e-38
Rpl32	3.73983e-29	0.320235	0.764	0.549	7.0062e-25
Sdc4	3.19166e-16	0.319551	0.844	0.742	5.97926e-12
Actb	3.8479e-33	0.3194	0.973	0.878	7.20866e-29
Rps8	1.6755e-32	0.318527	0.838	0.654	3.13888e-28
Picalm	3.30033e-38	0.318429	0.509	0.247	6.18283e-34
Rps5	4.58238e-29	0.317201	0.707	0.477	8.58462e-25
Rps14	1.17733e-27	0.313627	0.769	0.581	2.20561e-23
Pdxk	2.6067e-56	0.312009	0.284	0.076	4.88338e-52
Rps26	2.15016e-34	0.311076	0.72	0.473	4.02812e-30
Rps7	3.67765e-31	0.310422	0.638	0.388	6.88971e-27
Scin	6.61589e-56	0.310014	0.373	0.122	1.23942e-51
Tubb5	3.62933e-53	0.308607	0.34	0.106	6.79918e-49
Rplp0	5.31413e-31	0.30851	0.731	0.5	9.95549e-27
Pnrc1	1.37384e-22	0.307055	0.578	0.384	2.57375e-18
Hsp90ab1	5.82801e-29	0.30474	0.956	0.902	1.09182e-24
Rplp1	3.02869e-33	0.30236	0.849	0.665	5.67396e-29
Msn	4.80257e-29	0.30184	0.531	0.297	8.99713e-25
Prdx1	3.44194e-22	0.301477	0.709	0.554	6.44813e-18
Col4a2	4.56808e-45	0.299089	0.276	0.085	8.55785e-41
Eif6	4.79105e-33	0.298117	0.469	0.234	8.97555e-29
Plau	1.02868e-27	0.295713	0.436	0.223	1.92713e-23
Rpl3	8.5316e-29	0.294775	0.72	0.486	1.59831e-24
Vmp1	9.02526e-24	0.294603	0.709	0.52	1.69079e-19
Rpl23a	3.59623e-29	0.294491	0.673	0.45	6.73717e-25
Hmgn1	3.59738e-27	0.29293	0.576	0.353	6.73934e-23
Rps24	9.45497e-31	0.289169	0.818	0.605	1.77129e-26
Tagln2	1.57486e-26	0.28852	0.613	0.388	2.95035e-22
Rpl5	2.30901e-26	0.288172	0.629	0.404	4.32569e-22
H2-D1	1.21154e-30	0.287806	0.589	0.344	2.26969e-26
Pfn1	2.59895e-26	0.287458	0.647	0.419	4.86886e-22
Nr2f2	2.69356e-28	0.285145	0.293	0.123	5.04611e-24
Clic1	1.20302e-21	0.283479	0.573	0.377	2.25373e-17
Rps4x	7.66184e-26	0.283031	0.602	0.378	1.43537e-21
Rpl39	2.00237e-28	0.282729	0.593	0.357	3.75124e-24
Tsc22d1	4.25883e-18	0.27806	0.818	0.67	7.97849e-14
Marcks	2.06243e-55	0.277462	0.269	0.069	3.86376e-51
Tpm3	1.5334e-24	0.277255	0.727	0.518	2.87267e-20
1700016C15Rik	9.21486e-66	0.276689	0.291	0.07	1.72631e-61
Rps12	3.59025e-24	0.275174	0.647	0.426	6.72598e-20
H2-Ab1	1.27198e-28	0.274872	0.276	0.109	2.38293e-24
Tgm2	9.15217e-53	0.274376	0.324	0.098	1.71457e-48
Rpl7	1.43369e-27	0.273795	0.604	0.372	2.68587e-23
Anxa5	3.40272e-27	0.270306	0.596	0.35	6.37465e-23
Rack1	2.26283e-25	0.269228	0.62	0.406	4.23918e-21
Nap1l1	9.3533e-32	0.268033	0.478	0.242	1.75225e-27
Bcam	1.51579e-22	0.267937	0.42	0.23	2.83968e-18
Jun	8.21239e-20	0.266762	0.836	0.671	1.53851e-15
Nme1	3.08168e-26	0.266174	0.456	0.25	5.77322e-22
Sash1	5.8482e-50	0.265357	0.296	0.087	1.0956e-45
Myl6	1.54247e-14	0.265099	0.558	0.414	2.88967e-10
Rpl18	2.56313e-21	0.264345	0.609	0.414	4.80176e-17
Rpl17	1.53358e-26	0.26144	0.707	0.479	2.87302e-22
Zbtb20	4.43804e-17	0.261074	0.58	0.401	8.31423e-13
Spns2	6.24939e-55	0.259708	0.276	0.072	1.17076e-50
Spp1	1.03735e-24	0.2593	0.987	0.946	1.94337e-20
Eef1b2	2.90247e-24	0.256379	0.518	0.306	5.43749e-20
Rpl18a	4.11661e-21	0.256081	0.58	0.388	7.71206e-17
Ccdc50	2.87482e-30	0.255784	0.462	0.235	5.38569e-26
Apoe	6.86859e-33	0.255112	0.389	0.171	1.28676e-28
Rpl22l1	7.39422e-28	0.25449	0.458	0.241	1.38523e-23
Calm1	1.5792e-23	0.254244	0.876	0.684	2.95847e-19
Rpl12	7.70646e-26	0.253144	0.527	0.307	1.44373e-21
Rpsa	2.24157e-20	0.248124	0.671	0.471	4.19936e-16
Atox1	6.17182e-20	0.2473	0.511	0.324	1.15623e-15
App	1.28763e-17	0.2462	0.844	0.726	2.41224e-13
Calr	1.75566e-17	0.246086	0.671	0.515	3.28906e-13
Rps15	3.44348e-21	0.245642	0.609	0.406	6.45101e-17
Cib1	3.84917e-29	0.244294	0.338	0.149	7.21104e-25
Rpl38	2.64961e-21	0.24394	0.64	0.448	4.96377e-17
Myl12a	4.65725e-20	0.243327	0.693	0.472	8.7249e-16
Serpinh1	4.32822e-34	0.241458	0.34	0.139	8.10849e-30
Ly6e	8.90216e-23	0.241246	0.767	0.538	1.66773e-18
Myh9	5.52396e-17	0.24051	0.496	0.327	1.03486e-12
Nfkbiz	6.13538e-16	0.240425	0.451	0.287	1.1494e-11
Atf3	3.9345e-21	0.240154	0.831	0.602	7.37088e-17
Eef1a1	5.85345e-20	0.240145	0.687	0.509	1.09659e-15
Myof	8.82223e-28	0.239898	0.402	0.196	1.65276e-23
Rps3a1	4.40083e-22	0.239694	0.556	0.346	8.24452e-18
Rpl14	8.23015e-20	0.239254	0.78	0.61	1.54184e-15
Rpl6	1.18114e-20	0.23729	0.622	0.422	2.21276e-16
Agrn	2.31933e-39	0.234825	0.324	0.116	4.34504e-35
Rps27a	2.86263e-20	0.23392	0.658	0.453	5.36286e-16
S100a10	1.61535e-17	0.233593	0.816	0.634	3.0262e-13
Rhoc	4.53737e-34	0.233166	0.378	0.161	8.50031e-30
Rps27	3.98272e-20	0.232132	0.671	0.475	7.46123e-16
Eif1	6.49609e-19	0.232016	0.736	0.56	1.21698e-14
Rpl27	7.61161e-23	0.231859	0.596	0.381	1.42596e-18
Rps20	1.32873e-20	0.230843	0.629	0.439	2.48924e-16
Gstm5	3.12862e-28	0.230286	0.309	0.129	5.86116e-24
Ybx1	1.27581e-22	0.228205	0.864	0.695	2.3901e-18
Arpc2	4.56475e-14	0.22723	0.609	0.452	8.55161e-10
Rps18	3.83116e-20	0.225968	0.58	0.378	7.1773e-16
Rpl41	2.05224e-17	0.225206	0.802	0.636	3.84467e-13
Pmaip1	6.98732e-35	0.22371	0.284	0.1	1.30901e-30
Flna	5.13735e-24	0.222888	0.287	0.125	9.62432e-20
Ybx3	2.56699e-20	0.222161	0.442	0.253	4.809e-16
Hnrnpa3	3.16009e-15	0.222132	0.491	0.324	5.92011e-11
Cfl1	1.71421e-16	0.221932	0.604	0.429	3.21141e-12
Col18a1	1.02147e-12	0.22133	0.427	0.289	1.91362e-08
Hint1	7.76294e-15	0.221293	0.52	0.36	1.45431e-10
Plscr1	9.29501e-16	0.220354	0.322	0.182	1.74133e-11
Rpl22	1.08854e-18	0.219825	0.573	0.384	2.03927e-14
Aprt	8.94967e-31	0.218549	0.304	0.121	1.67663e-26
Rps25	1.88351e-18	0.21789	0.618	0.43	3.52856e-14
Pax8	2.44246e-34	0.217873	0.329	0.127	4.5757e-30
H3f3b	8.29424e-17	0.217833	0.78	0.603	1.55384e-12
Ptpn13	8.96327e-22	0.216706	0.298	0.14	1.67918e-17
Rpl34	2.34683e-17	0.215631	0.496	0.323	4.39655e-13
Rpl10	1.88815e-17	0.214899	0.478	0.3	3.53727e-13
Pabpc1	5.06713e-17	0.214832	0.82	0.671	9.49277e-13
Rps28	2.19658e-18	0.213861	0.598	0.41	4.11507e-14
Txn1	5.02555e-14	0.212893	0.633	0.475	9.41486e-10
Rps15a	9.50489e-19	0.212747	0.58	0.387	1.78065e-14
Plscr2	7.71245e-17	0.211775	0.498	0.32	1.44485e-12
Pdgfb	1.5536e-37	0.21176	0.256	0.081	2.91051e-33
Rrp1	2.73357e-17	0.211515	0.471	0.298	5.12107e-13
Pdia3	1.58854e-15	0.211445	0.607	0.441	2.97598e-11
Rbpms	1.73035e-19	0.210165	0.351	0.186	3.24164e-15
Erdr1	1.07324e-20	0.210069	0.431	0.242	2.01061e-16
Eif3c	3.84735e-14	0.208889	0.613	0.454	7.20763e-10
Sema3c	2.15444e-25	0.208849	0.336	0.152	4.03612e-21
Rpl23	1.86802e-16	0.208538	0.582	0.413	3.49955e-12
Rps13	3.95004e-17	0.207747	0.54	0.355	7.40001e-13
Rps10	1.48049e-17	0.207176	0.571	0.386	2.77355e-13
Arpc5	1.34838e-19	0.205857	0.496	0.303	2.52606e-15
Dhcr24	2.32262e-30	0.205636	0.284	0.109	4.3512e-26
Crim1	5.56713e-17	0.205433	0.298	0.155	1.04295e-12
Sytl2	3.8989e-18	0.204937	0.398	0.226	7.3042e-14
Npnt	4.48326e-17	0.204298	0.318	0.169	8.39894e-13
Gas5	2.74966e-13	0.203402	0.513	0.359	5.1512e-09
Fos	8.41037e-09	0.202847	0.727	0.6	0.00015756
Tuba1a	1.63332e-13	0.201506	0.329	0.191	3.05986e-09
Ier5	9.91847e-21	0.200172	0.289	0.135	1.85813e-16
Sem1	7.28844e-15	0.198397	0.504	0.346	1.36542e-10
Ncl	9.21562e-09	0.196357	0.796	0.704	0.000172645
Rpl8	1.22632e-13	0.194734	0.658	0.496	2.29739e-09
Rhob	4.30388e-17	0.194437	0.451	0.273	8.06288e-13
Gabarap	1.15691e-14	0.194104	0.522	0.36	2.16735e-10
Sox4	3.22866e-14	0.193992	0.562	0.383	6.04857e-10
Hmg20b	8.72323e-16	0.193938	0.371	0.218	1.63421e-11
Sh3d19	7.36248e-26	0.193483	0.318	0.139	1.37929e-21
Cebpb	4.27686e-14	0.193047	0.418	0.258	8.01228e-10
B230219D22Rik	5.44259e-16	0.192347	0.358	0.206	1.01961e-11
St13	2.01532e-14	0.192336	0.524	0.363	3.7755e-10
Fkbp1a	2.24961e-24	0.192031	0.342	0.161	4.21443e-20
Rps16	6.67304e-20	0.191954	0.418	0.233	1.25013e-15
Igfbp4	1.95839e-24	0.19064	0.353	0.162	3.66885e-20
Anp32b	9.88643e-11	0.189599	0.42	0.295	1.85212e-06
Rida	3.92983e-19	0.189397	0.447	0.255	7.36214e-15
Atpif1	8.62877e-13	0.189287	0.74	0.594	1.61651e-08
Junb	1.72689e-09	0.187663	0.562	0.418	3.23515e-05
Fosl2	2.11125e-19	0.186853	0.3	0.147	3.95522e-15
Hsbp1	1.23384e-16	0.186171	0.393	0.229	2.31148e-12
Cd63	4.61945e-11	0.185812	0.847	0.787	8.65407e-07
Rplp2	2.03542e-15	0.185513	0.607	0.431	3.81315e-11
Hnrnpc	3.04819e-13	0.185487	0.516	0.359	5.71047e-09
Cdk4	2.95125e-26	0.185463	0.253	0.099	5.52887e-22
Mrpl33	1.30618e-17	0.184486	0.409	0.24	2.44699e-13
Crip1	5.41637e-27	0.182823	0.253	0.096	1.0147e-22
Eif5a	2.74145e-13	0.182607	0.462	0.311	5.13584e-09
Nol7	2.6134e-11	0.182109	0.44	0.302	4.89594e-07
Rpl37	1.21377e-14	0.178407	0.593	0.422	2.27388e-10
Pdap1	1.07584e-11	0.178227	0.418	0.285	2.01548e-07
Rpl37a	1.81632e-11	0.177	0.593	0.444	3.40269e-07
Fkbp3	7.67206e-15	0.17689	0.418	0.257	1.43728e-10
Rpl26	8.47447e-13	0.176821	0.653	0.485	1.58761e-08
Selenop	5.10076e-14	0.176275	0.44	0.277	9.55577e-10
Cfap36	8.94984e-12	0.175338	0.307	0.186	1.67666e-07
Rps27l	1.38115e-11	0.174771	0.487	0.342	2.58744e-07
Rps29	3.80945e-12	0.173612	0.576	0.428	7.13662e-08
Pter	2.26878e-26	0.173443	0.28	0.112	4.25033e-22
Edf1	1.6655e-10	0.173396	0.416	0.283	3.12015e-06
Rpl19	2.48576e-14	0.173385	0.533	0.368	4.65682e-10
Hnrnpk	4.57182e-16	0.173294	0.487	0.313	8.56485e-12
Eif5b	1.01386e-06	0.173134	0.54	0.44	0.0189936
Rps11	6.90604e-16	0.172592	0.498	0.315	1.29378e-11
Ywhae	1.21405e-11	0.171829	0.596	0.446	2.27441e-07
Hsp90aa1	2.37227e-11	0.171335	0.796	0.692	4.44421e-07
Map4k4	7.88598e-24	0.170454	0.256	0.104	1.47736e-19
Nop58	1.96636e-15	0.169456	0.44	0.271	3.68378e-11
Tmsb4x	4.34355e-40	0.169307	0.818	0.47	8.13721e-36
Rock2	8.63962e-10	0.169299	0.473	0.336	1.61855e-05
Abracl	1.20538e-18	0.169228	0.267	0.125	2.25816e-14
Laptm4a	1.18347e-09	0.168589	0.493	0.361	2.21711e-05
Naca	7.75687e-13	0.167941	0.427	0.278	1.45317e-08
Rhoa	7.95439e-12	0.167438	0.458	0.311	1.49018e-07
Btf3	1.57404e-18	0.166922	0.396	0.218	2.94881e-14
Cct6a	1.4368e-10	0.165434	0.424	0.295	2.6917e-06
Nop10	2.04697e-12	0.165344	0.367	0.229	3.83479e-08
Ndrg1	1.39717e-09	0.164321	0.713	0.592	2.61747e-05
Rps23	4.1764e-14	0.164243	0.458	0.295	7.82407e-10
Hnrnpab	3.4502e-10	0.161576	0.498	0.362	6.4636e-06
Cnn3	1.99038e-10	0.161413	0.344	0.225	3.72879e-06
Ranbp1	5.43235e-17	0.160127	0.26	0.125	1.0177e-12
Rpl10a	3.78431e-15	0.15946	0.38	0.224	7.08953e-11
Rexo2	4.03101e-14	0.159095	0.329	0.189	7.5517e-10
Tmbim4	4.20972e-13	0.159048	0.356	0.215	7.88649e-09
Gng12	1.40514e-11	0.158829	0.416	0.275	2.63238e-07
Mtpn	2.24408e-12	0.156255	0.298	0.173	4.20406e-08
Litaf	5.01307e-14	0.156029	0.378	0.224	9.39148e-10
Nedd8	4.5889e-13	0.155742	0.378	0.232	8.59685e-09
Ppfibp1	5.59036e-15	0.155396	0.298	0.16	1.0473e-10
Rpl30	4.70598e-13	0.155316	0.409	0.26	8.81618e-09
Mtdh	7.28636e-09	0.155312	0.42	0.3	0.000136503
Sept2	6.73563e-18	0.155017	0.307	0.155	1.26185e-13
Ppia	2.85405e-11	0.154898	0.584	0.426	5.34678e-07
Zfp36	1.42677e-08	0.154291	0.553	0.427	0.000267292
Rpl11	1.14223e-07	0.153644	0.671	0.571	0.00213985
Dnajc8	1.78927e-11	0.153616	0.336	0.207	3.35201e-07
Pdia6	6.68648e-11	0.153511	0.382	0.25	1.25265e-06
Rrbp1	5.06236e-07	0.151986	0.573	0.467	0.00948382
Hnrnpu	1.0801e-05	0.1519	0.584	0.504	0.202346
Manf	1.39675e-14	0.149494	0.26	0.133	2.61667e-10
Cct4	9.43996e-10	0.149359	0.273	0.167	1.76848e-05
Park7	1.53296e-07	0.149012	0.422	0.315	0.00287185
Dusp1	2.10224e-08	0.148754	0.282	0.184	0.000393834
Swi5	9.1084e-11	0.148628	0.36	0.229	1.70637e-06
Rps17	1.50466e-08	0.148566	0.462	0.342	0.000281884
Csnk1a1	9.89252e-09	0.148486	0.54	0.422	0.000185326
Sept7	4.09765e-06	0.147952	0.413	0.322	0.0767653
Psme1	2.31555e-13	0.147853	0.309	0.175	4.33795e-09
Serbp1	2.20472e-09	0.147437	0.696	0.562	4.13032e-05
Timp3	6.97941e-06	0.147243	0.656	0.536	0.130752
Hsp90b1	8.18012e-07	0.146679	0.756	0.661	0.0153246
Psmb2	1.93515e-12	0.146596	0.253	0.138	3.62531e-08
Psmd8	5.7758e-11	0.146437	0.28	0.166	1.08204e-06
Acin1	5.9717e-07	0.146407	0.476	0.377	0.0111874
Slc4a4	6.9859e-16	0.145116	0.404	0.23	1.30874e-11
Taf10	2.38231e-09	0.144759	0.264	0.163	4.46303e-05
Rpl36a	1.94211e-09	0.144453	0.396	0.271	3.63835e-05
Sfr1	1.22136e-09	0.144097	0.349	0.228	2.2881e-05
Prnp	7.02118e-15	0.143657	0.253	0.127	1.31535e-10
Pa2g4	2.52763e-10	0.143505	0.313	0.196	4.73527e-06
Snrpg	2.15769e-17	0.14267	0.273	0.133	4.04221e-13
Sfxn1	5.44059e-14	0.142664	0.269	0.142	1.01924e-09
Rpl21	7.09652e-09	0.142402	0.573	0.451	0.000132946
Ik	8.95262e-10	0.142124	0.362	0.238	1.67718e-05
Rpl27a	4.35179e-11	0.14211	0.382	0.249	8.15264e-07
Sec11a	2.40094e-11	0.140886	0.251	0.14	4.49792e-07
Bhlhe40	1.78536e-08	0.140837	0.498	0.374	0.00033447
Cfdp1	9.47339e-11	0.140522	0.378	0.247	1.77475e-06
Rpl9	1.75098e-08	0.140381	0.536	0.405	0.000328029
Ssb	3.51743e-08	0.14036	0.491	0.366	0.000658956
Eef1g	3.27794e-07	0.139796	0.442	0.335	0.00614089
Myl12b	1.27313e-10	0.139733	0.38	0.247	2.38509e-06
Eif3f	2.36753e-09	0.139243	0.329	0.216	4.43534e-05
Mrfap1	3.86689e-13	0.138936	0.302	0.171	7.24423e-09
Mir703	8.08364e-14	0.138772	0.362	0.213	1.51439e-09
Gnas	2.63791e-07	0.138038	0.656	0.548	0.00494186
Cct5	2.61087e-10	0.137369	0.284	0.172	4.8912e-06
Tmem258	2.77236e-16	0.137158	0.271	0.134	5.19374e-12
Ran	4.60358e-12	0.136681	0.3	0.174	8.62435e-08
Psma4	6.1728e-09	0.136367	0.32	0.211	0.000115641
Ndufa6	5.68962e-06	0.136155	0.478	0.39	0.106589
Hmgb1	1.14502e-08	0.136041	0.524	0.402	0.000214507
Psmb1	2.7175e-08	0.135918	0.373	0.259	0.000509097
Sec61b	1.41893e-13	0.135633	0.304	0.17	2.65823e-09
Hdgf	2.69558e-07	0.13536	0.42	0.307	0.00504991
Chd4	3.01506e-06	0.135004	0.644	0.544	0.0564841
Elob	1.14139e-07	0.134992	0.478	0.366	0.00213829
Set	2.03083e-08	0.134765	0.484	0.357	0.000380455
Ubxn4	3.1814e-06	0.13452	0.44	0.34	0.0596004
Tpr	2.49199e-06	0.133496	0.52	0.42	0.0466849
Dync1i2	5.98681e-07	0.132999	0.46	0.351	0.0112157
Zfp91	0.000114141	0.132853	0.358	0.283	1
Psma7	1.98147e-06	0.132789	0.573	0.474	0.0371208
Sh3bgrl	1.26329e-10	0.131921	0.267	0.154	2.36664e-06
Rsl1d1	3.08636e-07	0.131678	0.304	0.211	0.00578199
Snrpb	9.98438e-08	0.131306	0.282	0.186	0.00187047
Minos1	2.39137e-06	0.131129	0.524	0.42	0.0447999
Ywhaq	2.25968e-08	0.130788	0.32	0.216	0.000423328
Myo6	2.11141e-05	0.130605	0.422	0.337	0.395552
Icam1	6.57506e-13	0.130133	0.256	0.135	1.23177e-08
Klf6	1.16859e-05	0.13002	0.807	0.744	0.218923
Lap3	1.95839e-13	0.129926	0.262	0.138	3.66886e-09
Lamp1	1.62869e-07	0.129201	0.558	0.443	0.00305119
Errfi1	6.55299e-07	0.128257	0.556	0.436	0.0122764
Smarca5	8.5711e-06	0.127751	0.38	0.29	0.160571
Ier2	4.5041e-05	0.127491	0.338	0.257	0.843798
Hprt	5.74248e-11	0.127073	0.267	0.153	1.0758e-06
Capns1	1.56307e-08	0.126743	0.471	0.339	0.000292825
Rps21	1.05331e-06	0.126051	0.564	0.46	0.0197326
Cd47	7.05424e-09	0.125053	0.431	0.3	0.000132154
Pdzk1	2.04007e-11	0.124851	0.26	0.143	3.82187e-07
Cyp2j5	3.5697e-13	0.124288	0.3	0.163	6.68747e-09
Clta	7.39833e-10	0.124059	0.411	0.276	1.386e-05
Pcbp2	1.99966e-05	0.123646	0.371	0.288	0.374617
Eif2s2	8.03867e-08	0.122008	0.5	0.377	0.00150596
Gnb2	8.94735e-06	0.121932	0.336	0.252	0.16762
Eif3a	3.88683e-06	0.121656	0.622	0.509	0.0728159
Srsf3	5.17713e-06	0.121193	0.311	0.224	0.0969883
Ywhab	7.554e-07	0.120872	0.458	0.355	0.0141517
Selenok	2.0923e-08	0.120541	0.287	0.185	0.000391971
Psmb3	3.12232e-08	0.118741	0.336	0.226	0.000584935
Rpl31	7.1521e-06	0.118113	0.458	0.372	0.133988
1110004F10Rik	1.61768e-09	0.117749	0.278	0.169	3.03057e-05
Psmd4	1.44389e-07	0.117529	0.316	0.213	0.00270499
Rpl36al	1.47407e-07	0.115913	0.336	0.232	0.00276152
Sh3glb1	1.49896e-05	0.115685	0.34	0.256	0.280815
Ubxn1	2.54466e-07	0.115359	0.362	0.257	0.00476717
Eif4a1	1.91073e-08	0.115357	0.304	0.2	0.000357956
Ssr3	1.51944e-07	0.11526	0.258	0.166	0.00284651
Cdc42	4.20114e-07	0.115041	0.54	0.432	0.00787042
Npc2	1.44124e-09	0.114623	0.309	0.193	2.70002e-05
Txnl1	6.94239e-09	0.114484	0.262	0.16	0.000130059
Sfpq	3.61886e-05	0.114081	0.458	0.367	0.677957
Eloc	1.37126e-06	0.113971	0.291	0.201	0.0256892
Hspe1	2.25088e-10	0.113431	0.453	0.309	4.21679e-06
Hspa8	8.1628e-08	0.113362	0.847	0.738	0.00152922
Tmed10	1.31171e-10	0.113324	0.351	0.22	2.45736e-06
Snrpd3	3.50967e-07	0.112755	0.32	0.22	0.00657502
Tmem50a	5.02017e-07	0.112505	0.271	0.178	0.00940478
Rpl35a	2.68988e-08	0.112285	0.378	0.261	0.000503922
Snw1	8.44663e-05	0.111841	0.296	0.223	1
Rpl7a	1.01246e-06	0.111152	0.391	0.287	0.0189674
Eef2	1.49703e-05	0.111097	0.576	0.481	0.280453
Capzb	1.0737e-06	0.110739	0.267	0.179	0.0201147
Cfl2	1.94303e-05	0.110641	0.318	0.234	0.364008
Psme2	1.70162e-07	0.110573	0.253	0.161	0.00318781
Cdc37	1.31585e-05	0.1104	0.293	0.21	0.24651
Cct2	3.76792e-05	0.110158	0.302	0.224	0.705883
Spcs1	1.49458e-09	0.109705	0.273	0.164	2.79994e-05
Canx	9.94389e-05	0.109168	0.653	0.57	1
Marc2	9.09238e-07	0.109042	0.324	0.229	0.0170337
Glyat	4.59489e-13	0.10886	0.329	0.184	8.60806e-09
Uqcc2	5.51681e-06	0.108324	0.282	0.198	0.103352
Ywhaz	2.4152e-05	0.107952	0.513	0.415	0.452463
Prr13	9.22669e-06	0.107776	0.287	0.204	0.172853
Rpl36	3.56605e-07	0.107333	0.509	0.394	0.00668065
Eef1d	4.63471e-07	0.106968	0.309	0.21	0.00868266
Pdcd6ip	4.3563e-06	0.10636	0.32	0.231	0.0816109
Tln1	0.000361838	0.106278	0.271	0.206	1
Fosb	6.69546e-06	0.105971	0.531	0.411	0.125433
Pfdn1	1.95345e-06	0.105781	0.318	0.225	0.0365959
Tkt	4.94308e-06	0.105554	0.309	0.221	0.0926037
Lmna	3.18278e-06	0.105537	0.42	0.313	0.0596262
Prpf38b	0.000339245	0.105352	0.382	0.308	1
Cd151	3.07841e-08	0.10509	0.262	0.164	0.00057671
Lpp	5.34223e-07	0.104956	0.267	0.175	0.0100081
Igf1r	4.19055e-05	0.104324	0.282	0.207	0.785058
Cct8	2.3492e-06	0.104111	0.258	0.174	0.04401
Ak2	3.6477e-08	0.104007	0.253	0.155	0.00068336
Cbx1	5.70343e-05	0.10366	0.342	0.262	1
Arf4	0.000423243	0.103603	0.258	0.196	1
Eny2	2.65654e-05	0.103003	0.293	0.214	0.497676
Ddx21	6.73376e-06	0.10282	0.324	0.234	0.12615
Psmd7	7.09648e-06	0.102791	0.273	0.191	0.132946
Rbx1	2.65091e-07	0.102342	0.309	0.208	0.00496622
Vdac2	3.75017e-06	0.101723	0.28	0.192	0.0702557
Cetn3	9.22898e-07	0.100994	0.26	0.171	0.0172896
Ldha	0.000539823	0.100132	0.469	0.402	1
Arl4c	9.8586e-05	0.099618	0.271	0.198	1
Eif3k	9.85425e-06	0.0986406	0.256	0.177	0.184609
Ywhah	1.46599e-05	0.0981641	0.362	0.274	0.274639
Psmb6	2.04227e-05	0.0980457	0.316	0.233	0.382599
Ddx46	0.00265196	0.097993	0.271	0.22	1
Snx6	0.000190074	0.0978983	0.313	0.242	1
Timm13	0.000212058	0.0971357	0.331	0.258	1
Ptms	0.000650704	0.0968889	0.604	0.538	1
Hnrnpm	5.06181e-05	0.096541	0.391	0.302	0.94828
Smc6	0.000175706	0.0965352	0.253	0.189	1
Fxr1	1.24246e-08	0.0951392	0.338	0.22	0.000232763
Ddx39b	1.49459e-06	0.0944908	0.276	0.187	0.0279996
G3bp2	6.26519e-06	0.0942846	0.284	0.198	0.117372
C130074G19Rik	0.000133791	0.0935988	0.291	0.218	1
Cacybp	1.17755e-05	0.0935432	0.262	0.183	0.220601
Smim10l1	8.23868e-06	0.0925528	0.256	0.176	0.154343
Banf1	2.66773e-06	0.0921853	0.258	0.171	0.0499773
Oaz1	2.6224e-05	0.0920734	0.436	0.337	0.49128
Rpl29	7.89801e-06	0.0912686	0.251	0.172	0.147961
Ppib	0.000236688	0.0910445	0.351	0.272	1
Dnaja1	1.5621e-05	0.0908237	0.5	0.396	0.292643
Fkbp4	4.68145e-05	0.090645	0.26	0.185	0.877022
Pttg1ip	5.69791e-06	0.0901679	0.251	0.169	0.106745
1810037I17Rik	2.01073e-06	0.0901259	0.32	0.225	0.037669
Serf2	7.63566e-05	0.0889793	0.309	0.23	1
Psma1	4.44741e-06	0.0888614	0.271	0.184	0.0833178
Prdx2	5.64858e-05	0.0880947	0.38	0.291	1
Rac1	4.70726e-05	0.0878523	0.309	0.225	0.881858
Selenof	3.96809e-05	0.0875607	0.322	0.239	0.743382
Hnrnpa0	0.000412552	0.0875217	0.356	0.283	1
Eif4g2	0.00215324	0.0866174	0.429	0.37	1
Cxxc5	0.00774471	0.0864929	0.262	0.216	1
Psma2	3.0783e-05	0.0862301	0.331	0.245	0.576688
Ccar1	0.000239083	0.0861207	0.344	0.272	1
Mrpl52	4.23144e-05	0.085963	0.309	0.227	0.792718
Ddx5	0.00105576	0.0857057	0.742	0.674	1
Tra2b	0.000378964	0.085555	0.264	0.198	1
Cxcl16	1.60147e-05	0.08418	0.273	0.191	0.300019
Etf1	6.32276e-06	0.0840973	0.3	0.21	0.118451
Sf3b2	0.000933358	0.0836005	0.387	0.314	1
Xrn2	0.000408503	0.0832888	0.253	0.188	1
H3f3a	2.78162e-06	0.0831633	0.26	0.174	0.0521108
Tardbp	0.000118444	0.0821663	0.253	0.184	1
Reep5	0.0165867	0.0821474	0.271	0.226	1
Stx7	0.00134314	0.0821191	0.262	0.205	1
Tmem256	4.0857e-05	0.0815987	0.267	0.19	0.765416
Wwc1	0.00207713	0.081147	0.311	0.25	1
Hist1h2bc	0.0182955	0.0803621	0.336	0.287	1
Tbca	0.000431887	0.0802134	0.316	0.245	1
Tax1bp1	0.0527289	0.0800138	0.622	0.602	1
Arf5	0.000614289	0.0780057	0.32	0.248	1
Slc25a4	1.87247e-05	0.0774126	0.536	0.428	0.350788
F2rl1	0.00402527	0.0771086	0.278	0.221	1
Dad1	0.00223679	0.0770161	0.273	0.215	1
Pcbp1	0.00295662	0.0762613	0.287	0.23	1
Csrnp1	9.1633e-06	0.0761972	0.251	0.168	0.171665
Dctn3	2.11936e-06	0.0761422	0.258	0.169	0.0397041
Fubp1	0.021903	0.0760727	0.271	0.23	1
Smc1a	0.00423182	0.0758614	0.282	0.227	1
Pkn2	0.0266709	0.0756543	0.296	0.257	1
Arglu1	0.000882488	0.0755171	0.451	0.372	1
Thoc7	0.000437984	0.075312	0.28	0.211	1
Ptges3	0.00103098	0.0746688	0.276	0.213	1
Ube2r2	0.000489798	0.0746113	0.3	0.23	1
Rad21	0.00876881	0.0745799	0.258	0.211	1
Hnrnpa2b1	0.0280296	0.0744871	0.689	0.656	1
Tbrg1	0.000131366	0.0740358	0.304	0.227	1
Zranb2	0.000522016	0.0726601	0.282	0.214	1
Skp1a	0.000240615	0.0724308	0.416	0.332	1
Itgb6	0.00167112	0.0723873	0.333	0.271	1
Matr3	0.0768149	0.0722332	0.338	0.305	1
Afdn	0.00189826	0.0721548	0.298	0.237	1
Cnbp	0.00137526	0.0718715	0.358	0.29	1
Arpc3	0.00165083	0.0718442	0.298	0.235	1
Calm3	2.3966e-05	0.0717282	0.258	0.178	0.448979
Rpl35	4.34323e-05	0.0711967	0.276	0.196	0.813661
Rbm25	0.00113971	0.0708032	0.533	0.448	1
Rab7	0.00208915	0.0701375	0.289	0.228	1
Hnrnpd	0.0145769	0.0692641	0.313	0.266	1
Rps6	0.000180829	0.0686608	0.291	0.217	1
Psmc3	0.000238265	0.0676109	0.298	0.221	1
Adgrg1	0.00113472	0.0667199	0.433	0.351	1
Sltm	0.0182347	0.0662863	0.316	0.27	1
Gspt1	0.043312	0.0661864	0.284	0.249	1
Cux1	0.00319707	0.0657035	0.278	0.22	1
Rbbp7	0.00274041	0.0654688	0.273	0.216	1
Pafah1b1	0.00251868	0.0645291	0.402	0.333	1
Prkar1a	0.00658963	0.0638459	0.282	0.231	1
Psmb4	0.000422566	0.0636359	0.36	0.282	1
Bzw1	0.00818411	0.0634849	0.307	0.255	1
Tnfrsf12a	0.00050924	0.0634692	0.553	0.457	1
Selenow	0.00264174	0.0632441	0.311	0.248	1
Tmem27	5.84517e-11	0.0630221	0.398	0.241	1.09503e-06
Cd81	0.168662	0.0629443	0.336	0.31	1
Mlec	0.0368773	0.0623054	0.289	0.248	1
Pbrm1	0.00319435	0.062072	0.256	0.199	1
Slc13a1	1.6696e-08	0.0620311	0.273	0.164	0.000312784
Gsk3b	0.0109072	0.0615773	0.256	0.205	1
Ifrd1	3.99703e-06	0.0615031	0.536	0.409	0.0748803
Cltc	0.0164323	0.0612904	0.273	0.227	1
Ube2d3	0.0608912	0.0611121	0.333	0.297	1
P4hb	0.0179869	0.0603387	0.309	0.263	1
Tpd52	0.0107318	0.0597701	0.349	0.295	1
Top1	0.0258024	0.0593827	0.393	0.347	1
Pcm1	0.0035657	0.0588633	0.271	0.212	1
Dynlrb1	0.0109489	0.0588609	0.253	0.204	1
Eif1a	0.0254017	0.0587985	0.307	0.263	1
Tmco1	0.0236376	0.0580508	0.271	0.228	1
Anp32a	0.0683776	0.0573111	0.404	0.367	1
Snrnp70	0.000347403	0.0571267	0.393	0.306	1
Txndc17	0.00246367	0.0566178	0.344	0.276	1
Mbnl2	0.0015046	0.0565257	0.287	0.223	1
Tm9sf3	0.060647	0.0563782	0.344	0.306	1
Wwp1	0.0399267	0.0563467	0.258	0.218	1
Atp6v1b2	0.00750848	0.0563287	0.253	0.201	1
Wasl	0.0634487	0.055614	0.273	0.24	1
BC005537	0.0964841	0.0554157	0.331	0.3	1
Prpf40a	0.0336496	0.0547955	0.307	0.264	1
Syncrip	0.0122034	0.0547221	0.258	0.21	1
S100a11	8.61586e-08	0.0545231	0.84	0.656	0.0016141
Slc25a39	0.224893	0.0545072	0.256	0.236	1
Prrc2c	0.0917302	0.053567	0.507	0.47	1
Dek	0.0768199	0.0533434	0.342	0.307	1
Cdk11b	0.153187	0.0527211	0.322	0.293	1
Luc7l3	0.0518229	0.0519173	0.353	0.309	1
Fau	0.00995852	0.0517395	0.449	0.388	1
Akap9	0.477754	0.0517341	0.391	0.385	1
Psmc1	0.00789304	0.0514202	0.316	0.259	1
Pfdn5	0.0229189	0.0508322	0.362	0.313	1
Map1lc3b	0.00310197	0.0508221	0.264	0.205	1
Romo1	0.00107439	0.0507545	0.304	0.234	1
Spint2	0.0162152	0.0500235	0.484	0.431	1
Msi2	0.0297605	0.0490284	0.278	0.235	1
Ppp2ca	0.0393145	0.0489173	0.273	0.232	1
Ndufa7	0.0987579	0.0487443	0.34	0.307	1
Clk1	0.00423137	0.0480665	0.262	0.204	1
Sf3b1	0.0810962	0.0471309	0.418	0.379	1
Gclm	0.000186085	0.0471283	0.338	0.253	1
Arpp19	0.0824153	0.046284	0.316	0.279	1
Hnrnpdl	0.184381	0.045643	0.253	0.23	1
Ndufb3	0.0847442	0.0446878	0.293	0.257	1
Smdt1	0.134511	0.0429246	0.327	0.293	1
Nars	0.326911	0.041884	0.331	0.318	1
Rtn4	0.000513273	0.0417966	0.564	0.457	1
Ndufc2	0.0357812	0.041751	0.331	0.286	1
Ubl5	0.0720022	0.0415282	0.313	0.274	1
Chd3	0.121308	0.0412641	0.287	0.255	1
Jak1	0.215665	0.0410886	0.258	0.232	1
Hnrnpul2	0.458687	0.0407925	0.267	0.258	1
Rnh1	0.178927	0.040346	0.271	0.247	1
Zc3h15	0.134957	0.039529	0.324	0.292	1
Atp2a2	0.0149225	0.039352	0.287	0.236	1
Vdac1	0.158229	0.0393346	0.32	0.29	1
Pebp1	0.0479078	0.038636	0.378	0.335	1
Rab14	0.411966	0.0379921	0.293	0.281	1
Cyb5a	0.0134228	0.0379049	0.347	0.292	1
U2surp	0.0560031	0.0375425	0.322	0.281	1
Zfand5	0.0499323	0.0374068	0.444	0.395	1
Arpc1b	0.0565523	0.0366468	0.351	0.304	1
Ppig	0.79921	0.0364182	0.293	0.295	1
Phlda1	0.0064263	0.0360561	0.289	0.228	1
Metap2	0.491109	0.035436	0.298	0.287	1
Csde1	0.117657	0.0352344	0.289	0.257	1
Nucks1	0.372576	0.0351736	0.327	0.312	1
Lamp2	0.193007	0.0342025	0.478	0.45	1
Slc27a2	5.25517e-13	0.0335187	0.378	0.214	9.84503e-09
Rab1a	0.119473	0.0328268	0.278	0.245	1
Hp1bp3	0.196579	0.0312481	0.307	0.283	1
D8Ertd738e	0.149806	0.0305793	0.251	0.222	1
Ube2k	0.220356	0.0303376	0.251	0.228	1
Abcf1	0.330097	0.0301426	0.269	0.25	1
Rab2a	0.134763	0.0290522	0.293	0.261	1
Actn4	0.838163	0.0288379	0.358	0.371	1
Cops9	0.134211	0.0285336	0.271	0.24	1
Fus	0.336096	0.0282058	0.364	0.342	1
Mif	0.117195	0.0271101	0.367	0.33	1
Srsf2	0.184499	0.0270784	0.307	0.279	1
Gnb1	0.194709	0.024926	0.269	0.243	1
Bod1l	0.698079	0.0245439	0.262	0.253	1
Atxn7l3b	0.288614	0.0244963	0.298	0.274	1
Adss	0.408033	0.0237905	0.258	0.241	1
Hspd1	0.0248941	0.022806	0.438	0.374	1
Pnn	0.176979	0.0226125	0.389	0.353	1
Ube2b	0.284336	0.0190604	0.302	0.277	1
Chmp4b	0.663606	0.0188171	0.351	0.342	1
Arhgdia	0.409971	0.018154	0.264	0.247	1
Eif4g1	0.596351	0.0180559	0.371	0.362	1
Pak2	0.34151	0.0179995	0.273	0.254	1
Phf3	0.180194	0.0170075	0.269	0.24	1
Ndufb8	0.212146	0.0165445	0.378	0.349	1
Tspo	0.109748	0.0165016	0.391	0.35	1
Senp6	0.58362	0.0164614	0.309	0.301	1
Drap1	0.252851	0.01612	0.273	0.249	1
Ncor1	0.843185	0.0159882	0.378	0.395	1
Tceal9	0.262703	0.01563	0.327	0.304	1
Mpc2	0.226841	0.0150789	0.491	0.46	1
Actg1	0.0669146	0.0141646	0.54	0.478	1
Rock1	0.805445	0.0131738	0.293	0.292	1
Ndufab1	0.286454	0.012762	0.296	0.272	1
Eif5	0.717584	0.0127008	0.431	0.448	1
Itgav	0.0436701	0.0105037	0.442	0.385	1
Lamb1	0.29751	0.0103943	0.269	0.245	1
Arf1	0.67332	0.010317	0.278	0.269	1
Dnaja2	0.725361	0.0100809	0.253	0.248	1
Rab11a	0.436552	0.00985098	0.267	0.25	1
Esd	0.195211	0.00877495	0.313	0.279	1
Srrm1	0.53803	0.00876684	0.38	0.366	1
Gadd45g	0.693999	0.00780209	0.387	0.382	1
Ktn1	0.360399	0.00735838	0.34	0.317	1
Purb	0.863255	0.00717725	0.28	0.285	1
Ndufb4	0.596157	0.0063697	0.264	0.252	1
Vcp	0.794213	0.0062847	0.331	0.327	1
Aplp2	0.452671	0.0048969	0.5	0.529	1
Srsf11	0.614217	0.00331344	0.336	0.324	1
Ctage5	0.937551	0.00211629	0.402	0.397	1
Dab2	0.00473204	0.00128756	0.322	0.252	1
Cox17	0.71043	0.00104175	0.329	0.32	1
Ralbp1	0.329201	0.000929377	0.244	0.267	1
Dstn	0.94151	0.000453508	0.378	0.373	1
Tpi1	0.893822	-0.000723238	0.324	0.32	1
Atp5d	0.947368	-0.00141791	0.484	0.474	1
Atp6v0b	0.265129	-0.00241223	0.418	0.381	1
Ndufb6	0.209585	-0.00259912	0.367	0.33	1
Calm2	0.527398	-0.00306912	0.529	0.492	1
Kmt2a	0.380097	-0.00448319	0.229	0.252	1
Sdhb	0.813852	-0.0050802	0.269	0.275	1
AC121965.1	0.724874	-0.00574098	0.356	0.341	1
Ddx3x	0.824378	-0.0060458	0.34	0.331	1
Ankrd11	0.933808	-0.00607366	0.258	0.254	1
Id2	0.0795706	-0.00663138	0.533	0.48	1
Ctnnb1	0.628486	-0.00893435	0.342	0.328	1
Glud1	0.693549	-0.00911418	0.28	0.289	1
Luc7l2	0.526939	-0.00922995	0.309	0.326	1
Kif5b	0.381219	-0.0101489	0.411	0.437	1
Pnisr	0.956581	-0.0112143	0.362	0.354	1
Hspa4	0.986553	-0.0118187	0.302	0.3	1
Chmp2a	0.318464	-0.0124368	0.267	0.291	1
Tmem59	0.968939	-0.0129134	0.28	0.277	1
Golgb1	0.121792	-0.0133479	0.309	0.35	1
Macf1	0.676749	-0.0137824	0.256	0.264	1
Son	0.608417	-0.014686	0.402	0.416	1
Bclaf1	0.625947	-0.0147627	0.307	0.318	1
Ndufa2	0.544744	-0.0156231	0.447	0.419	1
Gpx4	0.857406	-0.0178991	0.287	0.287	1
Brd2	0.840721	-0.0183468	0.262	0.263	1
Bsg	0.483449	-0.0199905	0.347	0.367	1
Gipc2	0.231628	-0.0213699	0.229	0.256	1
Immt	0.736694	-0.0227957	0.296	0.3	1
Mdh2	0.70061	-0.0229006	0.34	0.344	1
Atp2b1	0.426591	-0.0232524	0.302	0.316	1
Suclg1	0.738604	-0.0249488	0.249	0.253	1
Srsf5	0.449169	-0.0259343	0.282	0.295	1
Sod1	0.629147	-0.0260114	0.338	0.316	1
Atf4	0.149468	-0.0263358	0.289	0.329	1
Rdx	0.545155	-0.0263667	0.353	0.362	1
Ndufa11	0.811469	-0.0265557	0.276	0.274	1
Ppp1r15a	0.830231	-0.027173	0.267	0.256	1
Rsrc2	0.0460759	-0.0281703	0.273	0.322	1
Nktr	0.0852198	-0.0281715	0.227	0.267	1
Rtn3	0.223014	-0.029868	0.313	0.342	1
Fnbp1l	0.147064	-0.0299538	0.218	0.252	1
Ubb	0.577827	-0.029975	0.838	0.785	1
Ivns1abp	0.262414	-0.03041	0.469	0.509	1
Fkbp2	0.276733	-0.0314693	0.264	0.288	1
Tcf25	0.150943	-0.0318868	0.358	0.385	1
Os9	0.367779	-0.0320067	0.247	0.264	1
Trib1	0.454126	-0.0332914	0.276	0.289	1
Prpf4b	0.628194	-0.0337024	0.307	0.315	1
Tns1	0.0951674	-0.0350273	0.376	0.418	1
Cox7c	0.820498	-0.0356519	0.667	0.642	1
Dusp11	0.136949	-0.0360458	0.222	0.251	1
Cast	0.211836	-0.0362771	0.267	0.292	1
Tmbim6	0.0655596	-0.0372794	0.613	0.657	1
Ndufb5	0.0668099	-0.0374064	0.238	0.276	1
Taldo1	0.356749	-0.0378481	0.291	0.308	1
Tmem30a	0.174583	-0.0392237	0.253	0.28	1
Rbm39	0.430232	-0.0410092	0.538	0.547	1
Btg2	0.184739	-0.0417088	0.591	0.536	1
Ndufv2	0.109081	-0.0417737	0.231	0.268	1
Atp5o	0.269534	-0.0421466	0.407	0.427	1
Serinc1	0.374628	-0.0427192	0.253	0.269	1
Ndufa3	0.269004	-0.0429285	0.413	0.43	1
Nfe2l1	0.066716	-0.0431983	0.307	0.35	1
Ndufb2	0.0706125	-0.0446985	0.287	0.326	1
Ddx6	0.0953942	-0.0455133	0.238	0.273	1
Atrx	0.0595943	-0.0457901	0.418	0.461	1
Aes	0.0961899	-0.0463155	0.296	0.335	1
Usmg5	0.113069	-0.0467879	0.38	0.411	1
Chchd2	0.228883	-0.0481346	0.696	0.694	1
Ankrd12	0.0111855	-0.0498087	0.198	0.253	1
Psap	0.353596	-0.050164	0.309	0.321	1
Sult1d1	0.127359	-0.0512409	0.356	0.302	1
Uqcrb	0.119596	-0.0525415	0.413	0.442	1
Ccnl1	0.100932	-0.0530345	0.358	0.39	1
Cd2ap	0.911095	-0.0535583	0.636	0.599	1
Rsrp1	0.0958525	-0.0551997	0.329	0.362	1
Ndufb7	0.0518566	-0.0567775	0.28	0.32	1
Atp6v1f	0.147421	-0.0570614	0.336	0.364	1
Rbm47	0.00929303	-0.0571527	0.224	0.283	1
Tgoln1	0.0480738	-0.0582223	0.233	0.273	1
Syne2	0.31053	-0.0591773	0.642	0.647	1
Acadl	0.0361198	-0.0610972	0.32	0.366	1
Ndufb10	0.037997	-0.0657841	0.238	0.28	1
Cisd1	0.0498551	-0.0670564	0.218	0.255	1
Scaf11	0.0031065	-0.0674163	0.24	0.305	1
Ndufa10	0.0265255	-0.0675406	0.231	0.275	1
Ash1l	0.00270418	-0.0702251	0.253	0.321	1
Ndufa12	0.0290889	-0.0702759	0.284	0.33	1
Etfb	0.0727775	-0.0717574	0.313	0.346	1
Lgmn	0.794352	-0.0722799	0.364	0.36	1
Itsn2	0.00326261	-0.072585	0.196	0.255	1
Nipbl	0.00058519	-0.0753845	0.202	0.275	1
Cox6b1	0.135614	-0.0759788	0.582	0.596	1
2810474O19Rik	0.247164	-0.0764587	0.278	0.296	1
Strbp	0.00844766	-0.0764769	0.227	0.282	1
Samd9l	0.00264155	-0.0771794	0.216	0.28	1
Slc25a3	0.00761972	-0.0780604	0.498	0.559	1
Cox5a	0.0463519	-0.0785383	0.46	0.5	1
Ahnak	0.164556	-0.0790569	0.34	0.363	1
Arfgef1	0.00213101	-0.0800423	0.202	0.266	1
Ndufa13	0.00319145	-0.0817102	0.367	0.43	1
Sdha	0.000635092	-0.0817184	0.202	0.275	1
Atp5e	0.0109251	-0.0818947	0.482	0.527	1
Golga4	0.000824158	-0.0828016	0.396	0.488	1
Stat3	0.000396209	-0.0832003	0.207	0.285	1
Cyc1	0.000475817	-0.0834703	0.209	0.287	1
Spag9	0.012487	-0.0836568	0.202	0.251	1
Gm42418	0.845514	-0.0839434	0.869	0.873	1
Bag1	0.0115491	-0.0842611	0.371	0.419	1
Ubxn2a	0.00272654	-0.0843812	0.202	0.262	1
Uqcrfs1	0.00503651	-0.0851921	0.289	0.342	1
Mcl1	0.00037966	-0.0856615	0.293	0.383	1
Dst	0.000428228	-0.0866984	0.251	0.329	1
Slk	6.5138e-05	-0.0885227	0.247	0.342	1
Ptp4a2	0.0251324	-0.0888521	0.318	0.361	1
Ghitm	0.00127389	-0.09038	0.309	0.387	1
Atp5k	0.0105226	-0.090497	0.329	0.372	1
Ndufa4	0.109115	-0.0912544	0.627	0.625	1
Aldh2	0.0044944	-0.0917336	0.198	0.253	1
Tuba1c	0.0241094	-0.0943798	0.356	0.395	1
Ndufa1	0.00132358	-0.0946933	0.28	0.348	1
Sec63	0.00477577	-0.0950435	0.222	0.28	1
2010107E04Rik	0.00588324	-0.0951606	0.422	0.474	1
Acsl4	0.000526648	-0.0968844	0.187	0.257	1
Ctnna1	0.000674739	-0.0971521	0.4	0.477	1
Etfa	0.000472806	-0.0972333	0.216	0.29	1
Fermt2	0.000306692	-0.0990666	0.229	0.307	1
Camk2n1	8.3421e-06	-0.0995149	0.249	0.356	0.156281
Ogdh	1.40239e-05	-0.1022	0.167	0.258	0.262724
Ftl1	0.195911	-0.102397	0.487	0.494	1
Atp6v0e	0.00871916	-0.102512	0.251	0.303	1
Acadm	0.00300346	-0.102887	0.242	0.301	1
Ndufb9	0.00178325	-0.104778	0.367	0.425	1
H2afj	0.000205601	-0.106243	0.209	0.284	1
Hadha	1.77577e-05	-0.106983	0.182	0.273	0.332673
Akr1a1	0.400128	-0.107402	0.436	0.433	1
Atp5g1	0.00891289	-0.108017	0.342	0.391	1
Ndufb11	2.5337e-05	-0.108997	0.173	0.26	0.474664
Sat1	0.00169072	-0.112703	0.411	0.477	1
Gm37376	4.43035e-05	-0.113181	0.2	0.294	0.829981
Hspa9	0.000365721	-0.115883	0.364	0.442	1
Cd9	0.0190524	-0.116619	0.407	0.449	1
Pdha1	1.28789e-06	-0.118066	0.191	0.297	0.0241273
Ndufa5	2.03402e-05	-0.118167	0.289	0.383	0.381054
Rabac1	2.30322e-05	-0.119627	0.242	0.337	0.431486
Chpt1	0.854322	-0.120932	0.467	0.441	1
Atp5h	0.000239693	-0.121254	0.393	0.463	1
Srrm2	5.2743e-05	-0.122218	0.453	0.537	0.988087
Atp5j	0.000194227	-0.124127	0.402	0.483	1
Net1	4.15507e-06	-0.125503	0.211	0.312	0.0778412
Uqcr11	2.76884e-05	-0.128823	0.378	0.463	0.518714
Idh2	2.98463e-08	-0.133443	0.147	0.266	0.000559141
Ctsb	2.47232e-05	-0.134069	0.389	0.487	0.463164
Arl6ip1	0.00030885	-0.134483	0.389	0.463	1
Wls	7.18219e-07	-0.136847	0.236	0.345	0.0134551
Gadd45b	0.00466771	-0.137494	0.213	0.266	1
Ptbp3	5.73343e-06	-0.137699	0.256	0.354	0.10741
Aco2	4.10294e-07	-0.13917	0.193	0.299	0.00768644
Uqcrq	0.000810781	-0.140021	0.444	0.496	1
Gabarapl1	0.000230856	-0.140561	0.356	0.432	1
Atp5j2	1.70638e-05	-0.140737	0.411	0.505	0.319673
Atp5b	0.000111588	-0.140749	0.627	0.695	1
Sqstm1	0.157491	-0.142036	0.504	0.508	1
Cox4i1	6.3113e-05	-0.143212	0.736	0.794	1
Atp5c1	4.4446e-05	-0.143749	0.396	0.475	0.832652
Ndufc1	6.14077e-05	-0.143834	0.358	0.437	1
Map3k2	5.61036e-08	-0.144174	0.142	0.254	0.00105105
Atp5f1	1.92468e-06	-0.144337	0.342	0.454	0.036057
Sec62	8.12808e-08	-0.145209	0.358	0.49	0.00152271
Gls	2.97785e-07	-0.145276	0.224	0.336	0.0055787
Cystm1	0.000639205	-0.146395	0.431	0.492	1
Cdkn1a	0.000236421	-0.148823	0.213	0.29	1
Paxbp1	3.4337e-07	-0.150414	0.164	0.267	0.00643269
Uqcr10	2.46696e-05	-0.152845	0.44	0.521	0.462161
Elovl7	1.04041e-07	-0.153398	0.151	0.259	0.00194911
Cgnl1	2.35693e-07	-0.156204	0.233	0.347	0.00441548
Sptbn1	2.50813e-06	-0.156443	0.436	0.539	0.0469872
Uqcrh	3.97428e-09	-0.165699	0.304	0.44	7.44541e-05
Arhgap5	5.1274e-10	-0.166452	0.311	0.468	9.60567e-06
Tspan8	2.35334e-07	-0.168144	0.224	0.342	0.00440875
Clint1	4.65513e-07	-0.168308	0.209	0.313	0.00872093
Atp6v1e1	3.15905e-06	-0.169641	0.262	0.36	0.0591816
Cox8a	6.12528e-06	-0.172439	0.44	0.516	0.114751
Acat1	4.12809e-08	-0.172788	0.218	0.336	0.000773356
Krt8	0.000980629	-0.17509	0.529	0.606	1
Car2	0.109612	-0.175406	0.487	0.417	1
Hbegf	0.386571	-0.180321	0.66	0.565	1
Txnip	6.38257e-08	-0.180731	0.209	0.324	0.00119571
Atp5g3	2.65177e-07	-0.181988	0.553	0.626	0.00496782
Cst3	0.0010218	-0.182762	0.402	0.46	1
Cox5b	1.63122e-06	-0.184266	0.496	0.569	0.0305593
Aldoa	1.05489e-07	-0.184275	0.436	0.546	0.00197622
Phldb2	2.6341e-10	-0.184906	0.276	0.42	4.93473e-06
Cox6a1	1.50919e-06	-0.190094	0.731	0.752	0.0282731
Pkm	3.83731e-11	-0.193271	0.187	0.335	7.18882e-07
Slc38a2	2.003e-10	-0.193841	0.169	0.307	3.75242e-06
Erbin	1.32998e-09	-0.19519	0.238	0.366	2.49158e-05
Nfe2l2	9.80631e-09	-0.198155	0.271	0.388	0.000183711
Cox7a2	2.30164e-07	-0.199232	0.458	0.55	0.00431189
Sh3bgrl3	0.405296	-0.199464	0.433	0.411	1
Ubc	5.627e-05	-0.199681	0.764	0.799	1
Cox7b	3.91801e-10	-0.201338	0.391	0.523	7.34e-06
Cdh16	2.53212e-07	-0.205	0.487	0.589	0.00474367
Phyh	1.54363e-14	-0.210862	0.14	0.305	2.89183e-10
Cox6c	5.13162e-08	-0.210927	0.736	0.775	0.000961358
Mdh1	9.66642e-10	-0.212061	0.378	0.504	1.81091e-05
Atp5a1	3.77942e-10	-0.212743	0.478	0.6	7.08037e-06
Itm2b	4.53389e-07	-0.216218	0.696	0.737	0.00849378
Atp6v1a	1.44574e-07	-0.219013	0.278	0.386	0.00270845
Ezr	2.21214e-08	-0.219408	0.627	0.696	0.000414421
Aldob	0.000945873	-0.220144	0.404	0.285	1
Slc25a5	7.1756e-10	-0.223109	0.522	0.634	1.34428e-05
Paqr5	1.14449e-15	-0.233634	0.127	0.298	2.14409e-11
Kcnj16	2.59095e-12	-0.237427	0.229	0.378	4.85389e-08
Txnrd1	2.08136e-09	-0.240534	0.293	0.417	3.89923e-05
Mgst1	1.267e-16	-0.250397	0.098	0.27	2.3736e-12
Itga6	5.69089e-14	-0.260558	0.209	0.369	1.06613e-09
Gclc	3.60783e-14	-0.272464	0.131	0.289	6.75891e-10
Las1l	6.16297e-12	-0.285428	0.129	0.269	1.15457e-07
Gadd45a	2.02771e-16	-0.29111	0.229	0.416	3.79871e-12
Chka	4.03725e-12	-0.291452	0.218	0.365	7.56338e-08
Fth1	0.000322186	-0.291874	0.92	0.913	1
Tfcp2l1	3.73477e-20	-0.303119	0.118	0.315	6.99671e-16
Chchd10	5.61281e-17	-0.308111	0.367	0.539	1.0515e-12
Sfn	7.49225e-11	-0.322986	0.231	0.373	1.4036e-06
Iqgap1	3.04517e-24	-0.327741	0.231	0.468	5.70482e-20
Pdzk1ip1	1.90199e-13	-0.342274	0.344	0.488	3.56319e-09
Atp6v0a4	9.87123e-31	-0.35411	0.064	0.319	1.84928e-26
Slc5a3	2.24806e-24	-0.375242	0.058	0.271	4.21152e-20
Mrps6	9.05412e-26	-0.396683	0.133	0.367	1.6962e-21
Krt18	1.15584e-12	-0.405734	0.229	0.371	2.16535e-08
Serinc3	1.30419e-23	-0.425126	0.233	0.454	2.44326e-19
Clcnkb	5.3079e-39	-0.432133	0.027	0.319	9.94382e-35
Krt7	4.50965e-34	-0.442797	0.062	0.336	8.44838e-30
Prdx5	5.49267e-37	-0.462277	0.382	0.652	1.029e-32
Kng2	2.11046e-37	-0.464872	0.036	0.32	3.95374e-33
S100a1	4.01416e-25	-0.475887	0.322	0.529	7.52012e-21
Cdh1	3.42501e-45	-0.47674	0.069	0.403	6.41642e-41
Neat1	9.72234e-18	-0.481124	0.533	0.66	1.82138e-13
Oxct1	9.18985e-36	-0.485598	0.176	0.467	1.72163e-31
Cldn7	5.89202e-39	-0.512896	0.16	0.47	1.10381e-34
Tmem52b	4.53488e-32	-0.513373	0.018	0.267	8.49564e-28
Ctsd	2.82681e-22	-0.523081	0.462	0.621	5.29575e-18
Epcam	9.70116e-43	-0.539508	0.236	0.556	1.81741e-38
Lgals3	1.40127e-23	-0.545587	0.327	0.528	2.62514e-19
Nudt4	1.69386e-41	-0.57227	0.18	0.489	3.17328e-37
Tmem213	6.10778e-52	-0.580812	0.022	0.382	1.14423e-47
Slc34a1	4.44219e-18	-0.587022	0.116	0.288	8.32199e-14
Tacstd2	8.08597e-37	-0.597651	0.111	0.399	1.51483e-32
Gpx3	4.63636e-19	-0.606363	0.887	0.651	8.68575e-15
Malat1	1.30582e-63	-0.624623	1	0.998	2.44632e-59
Acsm2	0.000545028	-0.63408	0.269	0.299	1
Cd24a	9.25187e-38	-0.653366	0.382	0.623	1.73324e-33
Fxyd2	2.48265e-33	-0.722535	0.616	0.758	4.651e-29
mt-Co1	6.30688e-55	-0.760035	0.413	0.695	1.18153e-50
Atp1a1	3.59538e-75	-0.78802	0.571	0.83	6.73558e-71
Mal	1.81015e-84	-0.790144	0.042	0.54	3.39114e-80
Cldn4	6.66744e-26	-0.808068	0.302	0.509	1.24908e-21
Wfdc2	1.74282e-55	-0.842079	0.196	0.549	3.265e-51
mt-Nd1	3.44117e-64	-0.874536	0.689	0.859	6.4467e-60
Ly6a	5.08806e-40	-0.881479	0.513	0.704	9.53197e-36
Lcn2	3.46871e-38	-0.97145	0.109	0.404	6.49828e-34
Atp1b1	1.82047e-111	-0.981604	0.7	0.926	3.41047e-107
mt-Rnr2	6.86627e-110	-1.01456	1	1	1.28633e-105
mt-Cytb	3.16138e-78	-1.01725	0.847	0.945	5.92252e-74
mt-Nd4	4.26512e-73	-1.06846	0.613	0.828	7.99027e-69
mt-Nd2	4.02185e-79	-1.09339	0.758	0.906	7.53453e-75
mt-Rnr1	1.17803e-86	-1.13498	0.893	0.981	2.20692e-82
mt-Nd5	7.45094e-86	-1.19113	0.862	0.946	1.39586e-81
Mt2	1.94894e-56	-1.22524	0.144	0.515	3.65114e-52
Kap	0.0184108	-1.2798	0.416	0.455	1
Defb1	6.58574e-88	-1.31352	0.096	0.583	1.23377e-83
Mt1	1.11402e-57	-1.35873	0.373	0.687	2.08701e-53
S100g	3.42751e-14	-1.38728	0.182	0.337	6.42111e-10
Umod	4.52968e-47	-1.69958	0.18	0.495	8.4859e-43
Clu	1.46849e-51	-1.75943	0.616	0.749	2.75107e-47
Klk1	1.00824e-44	-2.06265	0.116	0.433	1.88884e-40
