# Supplementary material for: Ferroptotic stress promotes the accumulation of pro-inflammatory proximal tubular cells in maladaptive renal repair
Source: eLife. 2021 Jul 19;10:e68603. doi: 10.7554/eLife.68603 (PMC8318592; doi:10.7554/eLife.68603)
Supplement: Supplementary file 3. [file elife-68603-supp3.xlsx]

## Sheet: Up DA-PT (IRI) vs PT (IRI)
Term	Overlap	P-value	Adjusted P-value	Old P-value	Old Adjusted P-value	Odds Ratio	Combined Score	Genes
cellular response to cytokine stimulus (GO:0071345)	13/456	6.62494e-09	3.3807e-05	0	0	8.03064	151.236	ITGB1;EGR1;VCAM1;CXCL1;FOS;CXCL2;ZFP36L1;ZFP36;ANKRD1;RPS3;CCL2;VIM;JUNB
cytokine-mediated signaling pathway (GO:0019221)	13/633	3.04168e-07	0.000776084	0	0	5.78511	86.8095	ITGB1;EGR1;VCAM1;ANXA2;CXCL1;FOS;CXCL2;NFKBIA;TMSB4X;CCL2;VIM;B2M;JUNB
muscle contraction (GO:0006936)	7/137	5.59843e-07	0.000952293	0	0	14.3929	207.195	CALD1;TPM1;ITGA1;VIM;CALM1;CRYAB;MYL12A
cellular protein metabolic process (GO:0044267)	11/484	1.02879e-06	0.00131248	0	0	6.40205	88.2659	C3;RPS14;RPS9;LGALS1;RPS19;SPP1;RPS3;PLAT;IGFBP7;B2M;CP
cellular response to tumor necrosis factor (GO:0071356)	7/194	5.70615e-06	0.00415978	0	0	10.1641	122.721	NFKBIA;ZFP36;TMSB4X;ANKRD1;RPS3;CCL2;ZFP36L1
cellular response to oxygen-containing compound (GO:1901701)	8/274	5.65021e-06	0.00480551	0	0	8.22453	99.3837	EGR1;ZFP36;TPM1;ANKRD1;CCL2;FOS;ACTB;ZFP36L1
platelet aggregation (GO:0070527)	4/33	5.51897e-06	0.00563266	0	0	34.1443	413.395	HSPB1;CLIC1;MYL12A;ACTB
regulation of cell proliferation (GO:0042127)	12/740	1.03887e-05	0.00589041	0	0	4.56795	52.4162	BTG2;RPS9;ADAMTS1;ITGA1;CXCL1;IGFBP7;CXCL2;JUNB;SOX4;S100A11;HBEGF;ZFP36L1
homotypic cell-cell adhesion (GO:0034109)	4/38	9.82322e-06	0.00626599	0	0	29.6516	341.905	HSPB1;CLIC1;MYL12A;ACTB
viral process (GO:0016032)	7/220	1.29633e-05	0.00661519	0	0	8.96287	100.863	RPS14;RPS9;RPS19;DAG1;RPS3;CCL2;B2M
cell-matrix adhesion (GO:0007160)	5/90	1.69926e-05	0.00722612	0	0	15.6495	171.874	ITGB1;BCAM;VCAM1;ACTN1;ITGA1
response to lipopolysaccharide (GO:0032496)	6/155	1.85878e-05	0.00729642	0	0	10.9041	118.779	ZFP36;ANKRD1;CCL2;CXCL1;CXCL2;JUNB
extracellular matrix organization (GO:0030198)	7/229	1.68002e-05	0.00779375	0	0	8.61062	94.6662	ITGB1;SPARC;VCAM1;COL4A1;ITGA1;DAG1;SPP1
positive regulation of chemotaxis (GO:0050921)	4/48	2.52108e-05	0.00804068	0	0	23.4742	248.55	TMSB4X;HSPB1;CXCL1;CXCL2
response to tumor necrosis factor (GO:0034612)	5/97	2.44434e-05	0.00831565	0	0	14.5201	154.191	ZFP36;ANKRD1;RPS3;CCL2;ZFP36L1
positive regulation of nuclear-transcribed mRNA catabolic process, deadenylation-dependent decay (GO:1900153)	3/16	2.32241e-05	0.00846518	0	0	52.8169	563.573	BTG2;ZFP36;ZFP36L1
nuclear-transcribed mRNA catabolic process (GO:0000956)	6/174	3.56672e-05	0.0107065	0	0	9.71345	99.4782	RPS14;ZFP36;RPS9;RPS19;RPS3;ZFP36L1
positive regulation of neutrophil chemotaxis (GO:0090023)	3/24	8.22457e-05	0.0220895	0	0	35.2113	331.19	CD74;CXCL1;CXCL2
platelet degranulation (GO:0002576)	5/124	7.93005e-05	0.0224817	0	0	11.3585	107.25	SPARC;TMSB4X;ACTN1;ANXA5;CALM1
positive regulation of neutrophil migration (GO:1902624)	3/25	9.32235e-05	0.023786	0	0	33.8028	313.707	CD74;CXCL1;CXCL2
positive regulation of granulocyte chemotaxis (GO:0071624)	3/26	0.000105115	0.025543	0	0	32.5027	297.74	CD74;CXCL1;CXCL2
cellular response to organic cyclic compound (GO:0071407)	5/135	0.000118486	0.0274833	0	0	10.433	94.3215	EGR1;SPP1;CCL2;ACTB;ZFP36L1
cellular response to growth factor stimulus (GO:0071363)	5/139	0.000135912	0.0277424	0	0	10.1327	90.2169	ZFP36;ANKRD1;HSPB1;CCL2;ZFP36L1
lymphocyte differentiation (GO:0030098)	4/73	0.000131908	0.028047	0	0	15.4351	137.888	ITGB1;KLF6;VCAM1;SOX4
regulation of neutrophil chemotaxis (GO:0090022)	3/29	0.000146604	0.0287738	0	0	29.1404	257.245	CD74;CXCL1;CXCL2
regulation of apoptotic process (GO:0042981)	11/815	0.000131812	0.029245	0	0	3.80195	33.9672	ITGB1;NFKBIA;CD74;LGALS1;ACTN1;ANXA5;ANKRD1;RPS3;HSPB1;CRYAB;SOX4
positive regulation of receptor binding (GO:1900122)	2/6	0.000184669	0.0314123	0	0	93.8967	807.225	ANXA2;B2M
negative regulation of erythrocyte differentiation (GO:0045647)	2/6	0.000184669	0.0324954	0	0	93.8967	807.225	ZFP36;ZFP36L1
regulation of keratinocyte apoptotic process (GO:1902172)	2/6	0.000184669	0.033656	0	0	93.8967	807.225	ZFP36;ZFP36L1
negative regulation of binding (GO:0051100)	4/82	0.000206939	0.0340649	0	0	13.741	116.566	NFKBIA;ID3;NES;ACTB
regulated exocytosis (GO:0045055)	5/148	0.000182275	0.03445	0	0	9.51656	81.9375	SPARC;TMSB4X;ACTN1;ANXA5;CALM1
positive regulation of ATPase activity (GO:0032781)	3/35	0.000258618	0.0388156	0	0	24.1449	199.44	TMSB4X;TPM1;DYNLL1
regulation of apoptotic cell clearance (GO:2000425)	2/8	0.000343136	0.0397959	0	0	70.4225	561.788	C3;CCL2
positive regulation of apoptotic cell clearance (GO:2000427)	2/7	0.000257944	0.0398875	0	0	80.4829	665.012	C3;CCL2
SRP-dependent cotranslational protein targeting to membrane (GO:0006614)	4/89	0.000283535	0.0401911	0	0	12.6602	103.411	RPS14;RPS9;RPS19;RPS3
positive regulation of viral entry into host cell (GO:0046598)	2/8	0.000343136	0.0407214	0	0	70.4225	561.788	CD74;LGALS1
positive regulation of receptor activity (GO:2000273)	3/37	0.000305466	0.0410208	0	0	22.8397	184.857	ITGB1;ANXA2;CALM1
cytoplasmic sequestering of NF-kappaB (GO:0007253)	2/7	0.000257944	0.041134	0	0	80.4829	665.012	NFKBIA;TMSB4X
negative regulation of cellular protein metabolic process (GO:0032269)	4/89	0.000283535	0.0413395	0	0	12.6602	103.411	CSTB;BTG2;RPS3;PLAT
positive regulation of hydrolase activity (GO:0051345)	5/172	0.000365348	0.0414305	0	0	8.18867	64.8105	ITGB1;TPM1;RPS3;CCL2;CALM1
negative regulation of cell proliferation (GO:0008285)	7/363	0.000300427	0.0414346	0	0	5.43204	44.0555	BTG2;ADAMTS1;ITGA1;CXCL1;IGFBP7;SOX4;S100A11
nuclear-transcribed mRNA catabolic process, deadenylation-independent decay (GO:0031086)	2/8	0.000343136	0.041691	0	0	70.4225	561.788	ZFP36;ZFP36L1
regulation of cell death (GO:0010941)	4/96	0.000378632	0.0420034	0	0	11.7371	92.4759	JUNB;CRYAB;SOX4;IER3
positive regulation of monocyte differentiation (GO:0045657)	2/8	0.000343136	0.0427078	0	0	70.4225	561.788	CD74;ZFP36L1
protein targeting to ER (GO:0045047)	4/97	0.000393866	0.0427637	0	0	11.6161	91.0643	RPS14;RPS9;RPS19;RPS3
cotranslational protein targeting to membrane (GO:0006613)	4/93	0.000335459	0.0427962	0	0	12.1157	96.9258	RPS14;RPS9;RPS19;RPS3
retina homeostasis (GO:0001895)	3/38	0.000330807	0.0432848	0	0	22.2387	178.22	HSPB1;B2M;ACTB
negative regulation of DNA metabolic process (GO:0051053)	3/43	0.000477828	0.0497624	0	0	19.6528	150.27	ANKRD1;RPS3;S100A11
substantia nigra development (GO:0021762)	3/43	0.000477828	0.0507991	0	0	19.6528	150.27	DYNLL1;CALM1;ACTB
sequestering of actin monomers (GO:0042989)	2/10	0.00054894	0.0549263	0	0	56.338	422.959	TMSB4X;TMSB10
3'-UTR-mediated mRNA destabilization (GO:0061158)	2/10	0.00054894	0.0560248	0	0	56.338	422.959	ZFP36;ZFP36L1
regulation of cellular component movement (GO:0051270)	3/46	0.00058329	0.0572409	0	0	18.3711	136.806	RPS19;ACTN1;HBEGF
negative regulation of cellular process (GO:0048523)	8/534	0.00059556	0.0573423	0	0	4.22008	31.3383	BTG2;ADAMTS1;ACTN1;ITGA1;CXCL1;IGFBP7;SOX4;S100A11
viral gene expression (GO:0019080)	4/110	0.000633927	0.0599061	0	0	10.2433	75.4272	RPS14;RPS9;RPS19;RPS3
nuclear-transcribed mRNA catabolic process, nonsense-mediated decay (GO:0000184)	4/112	0.00067836	0.0607311	0	0	10.0604	73.3987	RPS14;RPS9;RPS19;RPS3
regulation of nuclear-transcribed mRNA poly(A) tail shortening (GO:0060211)	2/11	0.000669387	0.0609979	0	0	51.2164	374.348	BTG2;ZFP36
viral transcription (GO:0019083)	4/113	0.000701385	0.0617098	0	0	9.97133	72.4163	RPS14;RPS9;RPS19;RPS3
positive regulation of nuclear-transcribed mRNA poly(A) tail shortening (GO:0060213)	2/11	0.000669387	0.062107	0	0	51.2164	374.348	BTG2;ZFP36
PERK-mediated unfolded protein response (GO:0036499)	2/12	0.000801422	0.0693162	0	0	46.9484	334.701	CCL2;ATF3
chemokine-mediated signaling pathway (GO:0070098)	3/52	0.000836358	0.0699662	0	0	16.2514	115.164	CCL2;CXCL1;CXCL2
B cell differentiation (GO:0030183)	3/52	0.000836358	0.0711323	0	0	16.2514	115.164	ITGB1;KLF6;VCAM1
positive regulation of endothelial cell chemotaxis (GO:2001028)	2/13	0.000944963	0.076542	0	0	43.3369	301.814	TMSB4X;HSPB1
regulation of translation (GO:0006417)	5/213	0.000962142	0.0767158	0	0	6.61244	45.9323	BTG2;RPS3;HSPB1;VIM;SOX4
regulation of endothelial cell chemotaxis (GO:2001026)	2/13	0.000944963	0.0777766	0	0	43.3369	301.814	TMSB4X;HSPB1
regulation of monocyte differentiation (GO:0045655)	2/14	0.00109993	0.0850445	0	0	40.2414	274.145	CD74;ZFP36L1
regulation of mRNA stability (GO:0043488)	4/128	0.00111662	0.0850468	0	0	8.80282	59.8367	ZFP36;HSPB1;VIM;ZFP36L1
regulation of nuclear-transcribed mRNA catabolic process, deadenylation-dependent decay (GO:1900151)	2/14	0.00109993	0.0863529	0	0	40.2414	274.145	ZFP36;ZFP36L1
cellular response to corticosteroid stimulus (GO:0071384)	2/15	0.00126624	0.0936467	0	0	37.5587	250.58	ZFP36;ZFP36L1
positive regulation of phosphoprotein phosphatase activity (GO:0032516)	2/15	0.00126624	0.0950238	0	0	37.5587	250.58	ITGA1;CALM1
leukocyte adhesion to vascular endothelial cell (GO:0061756)	2/16	0.00144381	0.100929	0	0	35.2113	230.298	ITGB1;VCAM1
cytoplasmic sequestering of transcription factor (GO:0042994)	2/16	0.00144381	0.10233	0	0	35.2113	230.298	NFKBIA;TMSB4X
leukocyte tethering or rolling (GO:0050901)	2/16	0.00144381	0.103772	0	0	35.2113	230.298	ITGB1;VCAM1
negative regulation of apoptotic process (GO:0043066)	7/485	0.00164732	0.105079	0	0	4.06563	26.055	ITGB1;NFKBIA;CD74;ANXA5;HSPB1;CCL2;CRYAB
negative regulation of NF-kappaB import into nucleus (GO:0042347)	2/16	0.00144381	0.105254	0	0	35.2113	230.298	NFKBIA;TMSB4X
neutrophil activation involved in immune response (GO:0002283)	7/483	0.00160903	0.105268	0	0	4.08247	26.2589	C3;CSTB;ANXA2;CXCL1;DYNLL1;B2M;S100A11
cellular response to glucocorticoid stimulus (GO:0071385)	2/17	0.00163257	0.105456	0	0	33.14	212.679	ZFP36;ZFP36L1
positive regulation of gene expression (GO:0010628)	9/771	0.00157439	0.105712	0	0	3.28821	21.2217	EGR1;CD74;KLF6;SPP1;RPS3;FOS;VIM;ACTB;SOX4
response to lipid (GO:0033993)	4/140	0.0015542	0.105747	0	0	8.04829	52.0467	SPP1;CXCL1;CXCL2;JUNB
neutrophil degranulation (GO:0043312)	7/479	0.00153455	0.105821	0	0	4.11656	26.6733	C3;CSTB;ANXA2;CXCL1;DYNLL1;B2M;S100A11
cellular response to reactive oxygen species (GO:0034614)	3/65	0.00159946	0.106001	0	0	13.0011	83.7021	TPM1;RPS3;FOS
neutrophil mediated immunity (GO:0002446)	7/487	0.00168632	0.106238	0	0	4.04893	25.8533	C3;CSTB;ANXA2;CXCL1;DYNLL1;B2M;S100A11
negative regulation of protein binding (GO:0032091)	3/67	0.00174531	0.108614	0	0	12.613	80.1029	B2M;NES;ACTB
mRNA destabilization (GO:0061157)	2/18	0.00183244	0.111321	0	0	31.2989	197.249	ZFP36;ZFP36L1
regulation of keratinocyte proliferation (GO:0010837)	2/18	0.00183244	0.112662	0	0	31.2989	197.249	ZFP36;ZFP36L1
protein heterotetramerization (GO:0051290)	2/19	0.00204333	0.11849	0	0	29.6516	183.638	CD74;ANXA2
cellular response to interleukin-1 (GO:0071347)	4/150	0.00200027	0.11869	0	0	7.51174	46.6815	NFKBIA;EGR1;ANKRD1;CCL2
positive regulation of endothelial cell migration (GO:0010595)	3/70	0.00197924	0.118824	0	0	12.0724	75.1514	SPARC;TMSB4X;HSPB1
ribosomal small subunit assembly (GO:0000028)	2/19	0.00204333	0.119852	0	0	29.6516	183.638	RPS14;RPS19
B cell activation (GO:0042113)	3/73	0.00223183	0.127966	0	0	11.5763	70.6726	ITGB1;KLF6;VCAM1
regulation of epidermal cell differentiation (GO:0045604)	2/20	0.00226517	0.128435	0	0	28.169	171.552	ZFP36;ZFP36L1
positive regulation of phosphatase activity (GO:0010922)	2/22	0.00274137	0.148821	0	0	25.6082	151.07	ITGA1;CALM1
negative regulation of actin filament polymerization (GO:0030837)	2/22	0.00274137	0.150422	0	0	25.6082	151.07	TMSB4X;TMSB10
positive regulation of translation (GO:0045727)	3/78	0.0026956	0.151161	0	0	10.8342	64.0968	RPS9;VIM;SOX4
negative regulation of myeloid cell differentiation (GO:0045638)	2/22	0.00274137	0.152057	0	0	25.6082	151.07	ZFP36;ZFP36L1
positive regulation of mRNA catabolic process (GO:0061014)	2/23	0.00299558	0.16091	0	0	24.4948	142.33	ZFP36;ZFP36L1
MAPK cascade (GO:0000165)	5/278	0.00308637	0.16406	0	0	5.06637	29.2875	ZFP36;CCL2;CALM1;HBEGF;ZFP36L1
positive regulation of purine nucleotide biosynthetic process (GO:1900373)	2/24	0.00326043	0.169775	0	0	23.4742	134.411	TMSB4X;CALM1
cellular response to molecule of bacterial origin (GO:0071219)	3/84	0.00332539	0.171409	0	0	10.0604	57.4061	ZFP36;ANKRD1;CCL2
response to glucocorticoid (GO:0051384)	2/24	0.00326043	0.171526	0	0	23.4742	134.411	ZFP36;ZFP36L1
peptide biosynthetic process (GO:0043043)	4/174	0.00341757	0.174398	0	0	6.47564	36.774	RPS14;RPS9;RPS19;RPS3
regulation of DNA damage response, signal transduction by p53 class mediator (GO:0043516)	2/25	0.00353585	0.176896	0	0	22.5352	127.207	CD74;ANKRD1
cellular response to epidermal growth factor stimulus (GO:0071364)	2/25	0.00353585	0.178648	0	0	22.5352	127.207	ZFP36;ZFP36L1
cellular response to lipid (GO:0071396)	4/178	0.0037063	0.183624	0	0	6.33012	35.4342	ZFP36;ANKRD1;SPP1;CCL2
regulation of viral entry into host cell (GO:0046596)	2/26	0.00382174	0.187523	0	0	21.6685	120.629	CD74;LGALS1
positive regulation of cell proliferation (GO:0008284)	6/424	0.003931	0.191046	0	0	3.98618	22.0789	CD74;RPS9;S100A6;NES;SOX4;HBEGF
protein tetramerization (GO:0051262)	3/90	0.0040384	0.194414	0	0	9.38967	51.755	CD74;RPS19;ANXA2
cellular response to lipopolysaccharide (GO:0071222)	3/91	0.00416554	0.195016	0	0	9.28649	50.8984	ZFP36;ANKRD1;CCL2
leukocyte cell-cell adhesion (GO:0007159)	2/27	0.00411805	0.196396	0	0	20.8659	114.604	ITGB1;VCAM1
positive regulation of cellular protein metabolic process (GO:0032270)	3/91	0.00416554	0.196822	0	0	9.28649	50.8984	NFKBIA;VIM;SOX4
positive regulation of fibroblast proliferation (GO:0048146)	2/28	0.00442468	0.199816	0	0	20.1207	109.066	CD74;S100A6
negative regulation of response to DNA damage stimulus (GO:2001021)	2/28	0.00442468	0.2016	0	0	20.1207	109.066	CD74;RPS3
negative regulation of homeostatic process (GO:0032845)	2/28	0.00442468	0.203416	0	0	20.1207	109.066	ZFP36;ZFP36L1
cellular response to fibroblast growth factor stimulus (GO:0044344)	3/94	0.00456152	0.204188	0	0	8.99011	48.4576	ZFP36;CCL2;ZFP36L1
regulation of NIK/NF-kappaB signaling (GO:1901222)	2/28	0.00442468	0.205265	0	0	20.1207	109.066	TMSB4X;RPS3
regulation of keratinocyte differentiation (GO:0045616)	2/29	0.00474158	0.210402	0	0	19.4269	103.961	ZFP36;ZFP36L1
cellular response to organonitrogen compound (GO:0071417)	3/97	0.00497958	0.219059	0	0	8.71207	46.1949	EGR1;ACTB;ZFP36L1
regulation of leukocyte chemotaxis (GO:0002688)	2/30	0.00506866	0.221072	0	0	18.7793	99.2428	CXCL1;CXCL2
response to molecule of bacterial origin (GO:0002237)	3/98	0.0051239	0.221587	0	0	8.62317	45.4772	CXCL1;CXCL2;JUNB
cellular response to transforming growth factor beta stimulus (GO:0071560)	3/100	0.00542006	0.226709	0	0	8.4507	44.0928	ANKRD1;FOS;ZFP36L1
sarcomere organization (GO:0045214)	2/31	0.00540585	0.227984	0	0	18.1736	94.8709	TPM1;ANKRD1
positive regulation of protein dephosphorylation (GO:0035307)	2/31	0.00540585	0.229884	0	0	18.1736	94.8709	ITGA1;CALM1
positive regulation of interleukin-1 beta production (GO:0032731)	2/31	0.00540585	0.231816	0	0	18.1736	94.8709	EGR1;HSPB1
rRNA metabolic process (GO:0016072)	4/200	0.0055942	0.232091	0	0	5.6338	29.217	RPS14;RPS9;RPS19;RPS3
rRNA processing (GO:0006364)	4/202	0.00579241	0.234592	0	0	5.57802	28.7336	RPS14;RPS9;RPS19;RPS3
positive regulation of myeloid leukocyte differentiation (GO:0002763)	2/32	0.00575307	0.234863	0	0	17.6056	90.8102	CD74;ZFP36L1
regulation of erythrocyte differentiation (GO:0045646)	2/32	0.00575307	0.236758	0	0	17.6056	90.8102	ZFP36;ZFP36L1
regulation of I-kappaB kinase/NF-kappaB signaling (GO:0043122)	4/204	0.00599525	0.240896	0	0	5.52334	28.2617	NFKBIA;CD74;LGALS1;HSPB1
positive regulation of signal transduction (GO:0009967)	4/206	0.00620279	0.247288	0	0	5.46971	27.8012	C3;CD74;RPS3;SOX4
positive regulation of chemokine production (GO:0032722)	2/34	0.00647734	0.25232	0	0	16.57	83.5037	EGR1;CD74
negative regulation of DNA binding (GO:0043392)	2/34	0.00647734	0.25426	0	0	16.57	83.5037	NFKBIA;ID3
positive regulation of leukocyte migration (GO:0002687)	2/34	0.00647734	0.256231	0	0	16.57	83.5037	CXCL1;CXCL2
protein kinase B signaling (GO:0043491)	2/35	0.00685423	0.25909	0	0	16.0966	80.2075	CCL2;ZFP36L1
maturation of SSU-rRNA from tricistronic rRNA transcript (SSU-rRNA, 5.8S rRNA, LSU-rRNA) (GO:0000462)	2/35	0.00685423	0.261023	0	0	16.0966	80.2075	RPS14;RPS19
regulation of phosphoprotein phosphatase activity (GO:0043666)	2/35	0.00685423	0.262986	0	0	16.0966	80.2075	ITGA1;CALM1
erythrocyte differentiation (GO:0030218)	2/35	0.00685423	0.264978	0	0	16.0966	80.2075	RPS14;RPS19
cardiac muscle tissue morphogenesis (GO:0055008)	2/36	0.00724087	0.269709	0	0	15.6495	77.1207	TPM1;ANKRD1
regulation of protein binding (GO:0043393)	3/111	0.00723197	0.271358	0	0	7.61325	37.5276	B2M;NES;ACTB
muscle filament sliding (GO:0030049)	2/38	0.00804309	0.291091	0	0	14.8258	71.504	TPM1;VIM
positive regulation of neuron death (GO:1901216)	2/38	0.00804309	0.293171	0	0	14.8258	71.504	EGR1;FOS
cellular response to interferon-gamma (GO:0071346)	3/116	0.00816045	0.293259	0	0	7.28509	35.03	VCAM1;CCL2;B2M
actin-myosin filament sliding (GO:0033275)	2/38	0.00804309	0.29528	0	0	14.8258	71.504	TPM1;VIM
T cell differentiation (GO:0030217)	2/38	0.00804309	0.29742	0	0	14.8258	71.504	SOX4;ZFP36L1
positive regulation of phagocytosis (GO:0050766)	2/39	0.00845853	0.299749	0	0	14.4456	68.943	C3;CCL2
ribosome biogenesis (GO:0042254)	4/226	0.008546	0.30076	0	0	4.98567	23.7432	RPS14;RPS9;RPS19;RPS3
positive regulation of fat cell differentiation (GO:0045600)	2/39	0.00845853	0.301845	0	0	14.4456	68.943	ZFP36;ZFP36L1
response to cAMP (GO:0051591)	2/40	0.00888343	0.302214	0	0	14.0845	66.5291	JUNB;ZFP36L1
positive regulation of nucleic acid-templated transcription (GO:1903508)	6/502	0.00877967	0.302721	0	0	3.36681	15.9429	EGR1;CD74;KLF6;SPP1;FOS;SOX4
ncRNA processing (GO:0034470)	4/227	0.00867639	0.303258	0	0	4.9637	23.5634	RPS14;RPS9;RPS19;RPS3
positive regulation of cytokine biosynthetic process (GO:0042108)	2/40	0.00888343	0.304243	0	0	14.0845	66.5291	EGR1;HSPB1
post-translational protein modification (GO:0043687)	5/357	0.008768	0.304375	0	0	3.94524	18.6872	C3;LGALS1;SPP1;IGFBP7;CP
translation (GO:0006412)	4/232	0.00934791	0.309756	0	0	4.85673	22.6936	RPS14;RPS9;RPS19;RPS3
negative regulation of proteolysis (GO:0045861)	2/41	0.00931772	0.310773	0	0	13.741	64.2506	CSTB;PLAT
monocyte chemotaxis (GO:0002548)	2/41	0.00931772	0.312818	0	0	13.741	64.2506	RPS19;CCL2
positive regulation of receptor-mediated endocytosis (GO:0048260)	2/41	0.00931772	0.31489	0	0	13.741	64.2506	ANXA2;B2M
cellular macromolecule biosynthetic process (GO:0034645)	5/367	0.00980534	0.322817	0	0	3.83774	17.7489	RPS14;RPS9;RPS19;RPS3;PTMA
cytoskeleton organization (GO:0007010)	3/126	0.0102199	0.330076	0	0	6.70691	30.7406	TPM1;DAG1;CCL2
negative regulation of ERBB signaling pathway (GO:1901185)	2/43	0.0102142	0.331993	0	0	13.1019	60.0587	ITGA1;HBEGF
cardiac ventricle morphogenesis (GO:0003208)	2/43	0.0102142	0.334122	0	0	13.1019	60.0587	TPM1;SOX4
myeloid cell differentiation (GO:0030099)	2/44	0.0106762	0.336301	0	0	12.8041	58.1272	RPS14;RPS19
positive regulation of viral life cycle (GO:1903902)	2/44	0.0106762	0.33839	0	0	12.8041	58.1272	CD74;LGALS1
positive regulation of transport (GO:0051050)	2/44	0.0106762	0.340505	0	0	12.8041	58.1272	C3;ANXA2
ribosomal small subunit biogenesis (GO:0042274)	2/44	0.0106762	0.342646	0	0	12.8041	58.1272	RPS14;RPS19
positive regulation of blood vessel endothelial cell migration (GO:0043536)	2/45	0.0111474	0.348988	0	0	12.5196	56.2949	TMSB4X;HSPB1
maturation of SSU-rRNA (GO:0030490)	2/46	0.0116275	0.357442	0	0	12.2474	54.5545	RPS14;RPS19
negative regulation of protein modification by small protein conjugation or removal (GO:1903321)	2/46	0.0116275	0.359608	0	0	12.2474	54.5545	RPS3;SOX4
regulation of fibroblast proliferation (GO:0048145)	2/46	0.0116275	0.361801	0	0	12.2474	54.5545	CD74;S100A6
negative regulation of I-kappaB kinase/NF-kappaB signaling (GO:0043124)	2/47	0.0121167	0.368045	0	0	11.9868	52.8999	NFKBIA;TMSB4X
regulation of immune response (GO:0050776)	4/251	0.0122066	0.36858	0	0	4.48909	19.7779	ITGB1;C3;VCAM1;B2M
myofibril assembly (GO:0030239)	2/47	0.0121167	0.370249	0	0	11.9868	52.8999	TPM1;ANKRD1
inflammatory response (GO:0006954)	4/252	0.0123709	0.371344	0	0	4.47127	19.6397	CCL2;CXCL1;FOS;CXCL2
negative regulation of mitotic cell cycle (GO:0045930)	2/48	0.0126148	0.376451	0	0	11.7371	51.325	BTG2;ZFP36L1
positive regulation of response to DNA damage stimulus (GO:2001022)	2/49	0.0131217	0.387052	0	0	11.4976	49.8245	ANKRD1;RPS3
protein heterooligomerization (GO:0051291)	2/49	0.0131217	0.389302	0	0	11.4976	49.8245	CD74;ANXA2
negative regulation of protein ubiquitination (GO:0031397)	2/50	0.0136374	0.395406	0	0	11.2676	48.3937	RPS3;SOX4
regulation of blood vessel endothelial cell migration (GO:0043535)	2/50	0.0136374	0.397665	0	0	11.2676	48.3937	TMSB4X;HSPB1
negative regulation of sequence-specific DNA binding transcription factor activity (GO:0043433)	3/140	0.0135681	0.39792	0	0	6.03622	25.9559	NFKBIA;TMSB4X;ID3
positive regulation of macromolecule biosynthetic process (GO:0010557)	3/142	0.0140915	0.406265	0	0	5.9512	25.3651	CCL2;VIM;SOX4
regulation of DNA binding (GO:0051101)	2/52	0.0146947	0.421277	0	0	10.8342	45.7233	NFKBIA;ID3
negative regulation of programmed cell death (GO:0043069)	5/408	0.0149446	0.426047	0	0	3.45209	14.5105	NFKBIA;CD74;ANXA5;HSPB1;CRYAB
gene expression (GO:0010467)	5/411	0.0153799	0.43602	0	0	3.42689	14.3062	RPS14;RPS9;RPS19;RPS3;PTMA
ribosome assembly (GO:0042255)	2/56	0.0169119	0.476803	0	0	10.0604	41.0437	RPS14;RPS19
positive regulation of transcription, DNA-templated (GO:0045893)	9/1120	0.0172221	0.48288	0	0	2.26358	9.19368	NFKBIA;EGR1;CD74;KLF6;SPP1;FOS;JUNB;SOX4;ATF3
positive regulation of cell death (GO:0010942)	2/57	0.0174871	0.487632	0	0	9.88386	39.993	EGR1;FOS
positive regulation of myeloid leukocyte cytokine production involved in immune response (GO:0061081)	1/6	0.0211143	0.489756	0	0	46.9484	181.118	CD74
lymphoid progenitor cell differentiation (GO:0002320)	1/6	0.0211143	0.491992	0	0	46.9484	181.118	SOX4
amine metabolic process (GO:0009308)	1/6	0.0211143	0.494249	0	0	46.9484	181.118	VCAM1
antigen processing and presentation of endogenous peptide antigen (GO:0002483)	1/6	0.0211143	0.496527	0	0	46.9484	181.118	B2M
cellular response to granulocyte macrophage colony-stimulating factor stimulus (GO:0097011)	1/6	0.0211143	0.498826	0	0	46.9484	181.118	ZFP36
regulation of glial cell apoptotic process (GO:0034350)	1/6	0.0211143	0.501146	0	0	46.9484	181.118	CCL2
integrin-mediated signaling pathway (GO:0007229)	2/58	0.0180706	0.501163	0	0	9.71345	38.9847	ITGB1;ADAMTS1
negative regulation of cell cycle phase transition (GO:1901988)	1/6	0.0211143	0.503488	0	0	46.9484	181.118	ZFP36L1
cellular response to cold (GO:0070417)	1/6	0.0211143	0.505851	0	0	46.9484	181.118	NFKBIA
membrane raft assembly (GO:0001765)	1/6	0.0211143	0.508238	0	0	46.9484	181.118	ANXA2
regulation of extracellular exosome assembly (GO:1903551)	1/6	0.0211143	0.510646	0	0	46.9484	181.118	SDC4
negative regulation of DNA repair (GO:0045738)	1/6	0.0211143	0.513078	0	0	46.9484	181.118	RPS3
positive regulation of vesicle fusion (GO:0031340)	1/6	0.0211143	0.515533	0	0	46.9484	181.118	ANXA2
cardiac ventricle formation (GO:0003211)	1/6	0.0211143	0.518011	0	0	46.9484	181.118	SOX4
positive regulation of extrinsic apoptotic signaling pathway via death domain receptors (GO:1902043)	1/6	0.0211143	0.520514	0	0	46.9484	181.118	ATF3
positive regulation of ATP biosynthetic process (GO:2001171)	1/6	0.0211143	0.523041	0	0	46.9484	181.118	TMSB4X
positive regulation of cellular biosynthetic process (GO:0031328)	3/159	0.0190025	0.524161	0	0	5.31491	21.064	EGR1;VIM;SOX4
regulation of RNA polymerase II regulatory region sequence-specific DNA binding (GO:1903025)	1/7	0.0245904	0.525041	0	0	40.2414	149.111	TMSB4X
spinal cord motor neuron differentiation (GO:0021522)	1/6	0.0211143	0.525592	0	0	46.9484	181.118	SOX4
regulation of chemokine biosynthetic process (GO:0045073)	1/7	0.0245904	0.527247	0	0	40.2414	149.111	EGR1
cellular response to iron ion (GO:0071281)	1/6	0.0211143	0.528168	0	0	46.9484	181.118	B2M
response to reactive oxygen species (GO:0000302)	2/60	0.019262	0.528462	0	0	9.38967	37.0857	TPM1;FOS
noradrenergic neuron differentiation (GO:0003357)	1/7	0.0245904	0.529472	0	0	40.2414	149.111	SOX4
positive regulation of hormone metabolic process (GO:0032352)	1/6	0.0211143	0.53077	0	0	46.9484	181.118	EGR1
cell differentiation in spinal cord (GO:0021515)	1/7	0.0245904	0.531715	0	0	40.2414	149.111	SOX4
regulation of angiogenesis (GO:0045765)	3/177	0.0251121	0.53173	0	0	4.77441	17.5909	ITGB1;SPARC;HSPB1
response to organic cyclic compound (GO:0014070)	2/69	0.0250148	0.531878	0	0	8.16493	30.1146	SPP1;CCL2
response to granulocyte macrophage colony-stimulating factor (GO:0097012)	1/6	0.0211143	0.533398	0	0	46.9484	181.118	ZFP36
regulation of natural killer cell chemotaxis (GO:2000501)	1/7	0.0245904	0.533978	0	0	40.2414	149.111	CCL2
B cell mediated immunity (GO:0019724)	1/8	0.0280543	0.534183	0	0	35.2113	125.831	CD74
response to heparin (GO:0071503)	1/6	0.0211143	0.536051	0	0	46.9484	181.118	EGR1
regulation of T cell proliferation (GO:0042129)	2/62	0.0204856	0.536093	0	0	9.08678	35.3297	VCAM1;SDC4
response to vitamin D (GO:0033280)	1/8	0.0280543	0.536184	0	0	35.2113	125.831	SPP1
positive regulation of cell migration by vascular endothelial growth factor signaling pathway (GO:0038089)	1/7	0.0245904	0.53626	0	0	40.2414	149.111	HSPB1
positive regulation of cellular amide metabolic process (GO:0034250)	2/61	0.0198698	0.536484	0	0	9.23574	36.1908	VIM;SOX4
negative regulation of protein phosphorylation (GO:0001933)	3/178	0.025479	0.537271	0	0	4.74759	17.4232	DAG1;HSPB1;CALM1
vascular endothelial growth factor receptor signaling pathway (GO:0048010)	2/70	0.0256924	0.537328	0	0	8.04829	29.4693	HSPB1;ACTB
regulation of receptor binding (GO:1900120)	1/8	0.0280543	0.538199	0	0	35.2113	125.831	B2M
regulation of low-density lipoprotein particle clearance (GO:0010988)	1/7	0.0245904	0.538561	0	0	40.2414	149.111	ANXA2
embryonic camera-type eye development (GO:0031076)	1/6	0.0211143	0.538732	0	0	46.9484	181.118	NES
diterpenoid metabolic process (GO:0016101)	2/62	0.0204856	0.538856	0	0	9.08678	35.3297	SDC4;RDH10
positive regulation of leukocyte chemotaxis (GO:0002690)	2/61	0.0198698	0.539338	0	0	9.23574	36.1908	CXCL1;CXCL2
interferon-gamma-mediated signaling pathway (GO:0060333)	2/70	0.0256924	0.53954	0	0	8.04829	29.4693	VCAM1;B2M
regulation of G-protein coupled receptor protein signaling pathway (GO:0008277)	2/74	0.0284762	0.540202	0	0	7.61325	27.0931	C3;CALM1
positive regulation of tumor necrosis factor biosynthetic process (GO:0042535)	1/8	0.0280543	0.54023	0	0	35.2113	125.831	HSPB1
bone cell development (GO:0098751)	1/7	0.0245904	0.540883	0	0	40.2414	149.111	ANXA2
positive regulation of microtubule motor activity (GO:2000576)	1/6	0.0211143	0.541439	0	0	46.9484	181.118	DYNLL1
DNA damage response, signal transduction by p53 class mediator resulting in cell cycle arrest (GO:0006977)	2/62	0.0204856	0.541648	0	0	9.08678	35.3297	BTG2;SOX4
positive regulation of protein modification process (GO:0031401)	3/163	0.0202791	0.541801	0	0	5.18448	20.21	C3;CD74;CALM1
positive regulation of T cell proliferation (GO:0042102)	2/61	0.0198698	0.542222	0	0	9.23574	36.1908	VCAM1;RPS3
immunoglobulin mediated immune response (GO:0016064)	1/8	0.0280543	0.542277	0	0	35.2113	125.831	CD74
mitral valve development (GO:0003174)	1/7	0.0245904	0.543224	0	0	40.2414	149.111	SOX4
regulation of proteolysis (GO:0030162)	2/63	0.0211093	0.544045	0	0	8.94254	34.5007	CSTB;PLAT
positive regulation of ryanodine-sensitive calcium-release channel activity (GO:0060316)	1/8	0.0280543	0.544339	0	0	35.2113	125.831	CALM1
stress-activated MAPK cascade (GO:0051403)	2/62	0.0204856	0.544469	0	0	9.08678	35.3297	ZFP36;ZFP36L1
regulation of protein kinase B signaling (GO:0051896)	3/163	0.0202791	0.544653	0	0	5.18448	20.21	ITGB1;DAG1;HBEGF
negative regulation of interleukin-8 secretion (GO:2000483)	1/7	0.0245904	0.545586	0	0	40.2414	149.111	TMSB4X
regulation of amyloid fibril formation (GO:1905906)	1/8	0.0280543	0.546416	0	0	35.2113	125.831	CRYAB
iron ion homeostasis (GO:0055072)	2/63	0.0211093	0.546807	0	0	8.94254	34.5007	B2M;CP
positive regulation of apoptotic process (GO:0043065)	4/307	0.02369	0.547014	0	0	3.67023	13.7366	ITGB1;ANKRD1;RPS3;SOX4
positive regulation of lymphocyte proliferation (GO:0050671)	2/71	0.0263773	0.547169	0	0	7.93493	28.8455	CD74;VCAM1
negative regulation of glial cell apoptotic process (GO:0034351)	1/7	0.0245904	0.547968	0	0	40.2414	149.111	CCL2
regulation of endodeoxyribonuclease activity (GO:0032071)	1/8	0.0280543	0.54851	0	0	35.2113	125.831	RPS3
actomyosin structure organization (GO:0031032)	2/71	0.0263773	0.549402	0	0	7.93493	28.8455	TPM1;ANKRD1
signal transduction involved in mitotic G1 DNA damage checkpoint (GO:0072431)	2/63	0.0211093	0.549597	0	0	8.94254	34.5007	BTG2;SOX4
negative regulation of cellular amide metabolic process (GO:0034249)	2/75	0.0291904	0.549662	0	0	7.51174	26.5459	BTG2;RPS3
positive regulation of lipid transport (GO:0032370)	1/7	0.0245904	0.550372	0	0	40.2414	149.111	SPP1
regulation of ATP biosynthetic process (GO:2001169)	1/8	0.0280543	0.550619	0	0	35.2113	125.831	TMSB4X
retinoid metabolic process (GO:0001523)	2/75	0.0291904	0.551698	0	0	7.51174	26.5459	SDC4;RDH10
regulation of epithelial cell proliferation (GO:0050678)	2/72	0.0270697	0.552546	0	0	7.82473	28.2421	ZFP36;ZFP36L1
positive regulation of respiratory burst (GO:0060267)	1/8	0.0280543	0.552745	0	0	35.2113	125.831	RPS19
regulation of hormone biosynthetic process (GO:0046885)	1/7	0.0245904	0.552796	0	0	40.2414	149.111	EGR1
regulation of neuron death (GO:1901214)	2/72	0.0270697	0.554765	0	0	7.82473	28.2421	EGR1;FOS
actin filament network formation (GO:0051639)	1/8	0.0280543	0.554888	0	0	35.2113	125.831	ACTN1
smooth muscle cell migration (GO:0014909)	1/7	0.0245904	0.555242	0	0	40.2414	149.111	PLAT
Fc receptor signaling pathway (GO:0038093)	3/183	0.0273573	0.556192	0	0	4.61787	16.6187	NFKBIA;FOS;CALM1
regulation of fat cell differentiation (GO:0045598)	2/72	0.0270697	0.557002	0	0	7.82473	28.2421	ZFP36;ZFP36L1
basement membrane organization (GO:0071711)	1/8	0.0280543	0.557047	0	0	35.2113	125.831	COL4A1
Fc-epsilon receptor signaling pathway (GO:0038095)	3/182	0.0269758	0.557318	0	0	4.64324	16.7752	NFKBIA;FOS;CALM1
modification by symbiont of host morphology or physiology (GO:0044003)	1/7	0.0245904	0.55771	0	0	40.2414	149.111	DAG1
negative regulation of protein homooligomerization (GO:0032463)	1/8	0.0280543	0.559223	0	0	35.2113	125.831	CRYAB
positive regulation of intracellular signal transduction (GO:1902533)	5/479	0.0276296	0.5595	0	0	2.9404	10.5527	ITGB1;CD74;LGALS1;RPS3;HBEGF
positive regulation of T cell activation (GO:0050870)	2/68	0.0243448	0.559602	0	0	8.285	30.7824	VCAM1;CCL2
positive regulation of inflammatory response (GO:0050729)	2/73	0.0277693	0.560106	0	0	7.71754	27.6583	NFKBIA;RPS19
response to vitamin (GO:0033273)	1/9	0.0315061	0.560193	0	0	31.2989	108.218	SPP1
regulation of cyclic-nucleotide phosphodiesterase activity (GO:0051342)	1/7	0.0245904	0.5602	0	0	40.2414	149.111	CALM1
response to interleukin-1 (GO:0070555)	2/76	0.0299116	0.561173	0	0	7.4129	26.0156	ANKRD1;CCL2
positive regulation of extracellular matrix assembly (GO:1901203)	1/8	0.0280543	0.561416	0	0	35.2113	125.831	DAG1
cytoskeletal anchoring at plasma membrane (GO:0007016)	1/9	0.0315061	0.562152	0	0	31.2989	108.218	DAG1
positive regulation of cell differentiation (GO:0045597)	3/194	0.0317435	0.562455	0	0	4.35603	15.0286	ZFP36;JUNB;ZFP36L1
regulation of cyclic nucleotide metabolic process (GO:0030799)	1/7	0.0245904	0.562712	0	0	40.2414	149.111	CALM1
regulation of vascular associated smooth muscle cell migration (GO:1904752)	1/8	0.0280543	0.563626	0	0	35.2113	125.831	TPM1
columnar/cuboidal epithelial cell differentiation (GO:0002065)	1/9	0.0315061	0.564124	0	0	31.2989	108.218	SOX4
antigen processing and presentation of exogenous peptide antigen via MHC class I, TAP-independent (GO:0002480)	1/9	0.0315061	0.566111	0	0	31.2989	108.218	B2M
mesodermal cell differentiation (GO:0048333)	1/9	0.0315061	0.568111	0	0	31.2989	108.218	ITGB1
mitral valve morphogenesis (GO:0003183)	1/9	0.0315061	0.570126	0	0	31.2989	108.218	SOX4
positive regulation of transcription from RNA polymerase II promoter (GO:0045944)	7/848	0.0305249	0.570581	0	0	2.32527	8.11337	NFKBIA;EGR1;KLF6;FOS;JUNB;SOX4;ATF3
regulation of cell communication by electrical coupling involved in cardiac conduction (GO:1901844)	1/9	0.0315061	0.572155	0	0	31.2989	108.218	CALM1
macrophage migration (GO:1905517)	1/10	0.0349458	0.573403	0	0	28.169	94.4777	CCL2
response to muscle stretch (GO:0035994)	1/9	0.0315061	0.574198	0	0	31.2989	108.218	ANKRD1
positive regulation of vacuole organization (GO:0044090)	1/10	0.0349458	0.575252	0	0	28.169	94.4777	ANXA2
negative regulation of cellular macromolecule biosynthetic process (GO:2000113)	5/512	0.0353313	0.576025	0	0	2.75088	9.19615	BTG2;ANKRD1;RPS3;ID3;S100A11
negative regulation of lipid localization (GO:1905953)	1/9	0.0315061	0.576256	0	0	31.2989	108.218	NFKBIA
regulation of transcription from RNA polymerase II promoter (GO:0006357)	10/1478	0.0352707	0.57688	0	0	1.90589	6.37462	NFKBIA;RPS14;EGR1;ZFP36;KLF6;ANKRD1;FOS;JUNB;SOX4;ATF3
positive regulation of execution phase of apoptosis (GO:1900119)	1/10	0.0349458	0.577114	0	0	28.169	94.4777	RPS3
positive regulation of nitric-oxide synthase biosynthetic process (GO:0051770)	1/9	0.0315061	0.578329	0	0	31.2989	108.218	CCL2
cellular response to hormone stimulus (GO:0032870)	2/80	0.032867	0.578346	0	0	7.04225	24.0513	JUNB;ZFP36L1
positive regulation of lipid localization (GO:1905954)	1/10	0.0349458	0.578988	0	0	28.169	94.4777	C3
RNA transport (GO:0050658)	2/80	0.032867	0.580347	0	0	7.04225	24.0513	ZFP36;ZFP36L1
regulation of leukocyte activation (GO:0002694)	1/9	0.0315061	0.580417	0	0	31.2989	108.218	CD74
regulation of mRNA 3'-end processing (GO:0031440)	1/10	0.0349458	0.580874	0	0	28.169	94.4777	ZFP36L1
regulation of muscle system process (GO:0090257)	1/9	0.0315061	0.58252	0	0	31.2989	108.218	TPM1
neuroepithelial cell differentiation (GO:0060563)	1/10	0.0349458	0.582772	0	0	28.169	94.4777	SOX4
regulation of macrophage cytokine production (GO:0010935)	1/9	0.0315061	0.584638	0	0	31.2989	108.218	CD74
muscle cell migration (GO:0014812)	1/10	0.0349458	0.584683	0	0	28.169	94.4777	PLAT
positive regulation of bone remodeling (GO:0046852)	1/10	0.0349458	0.586606	0	0	28.169	94.4777	SPP1
negative regulation of NIK/NF-kappaB signaling (GO:1901223)	1/9	0.0315061	0.586772	0	0	31.2989	108.218	TMSB4X
positive regulation of receptor recycling (GO:0001921)	1/10	0.0349458	0.588542	0	0	28.169	94.4777	ANXA2
positive regulation of bone resorption (GO:0045780)	1/10	0.0349458	0.590491	0	0	28.169	94.4777	SPP1
macrophage chemotaxis (GO:0048246)	1/10	0.0349458	0.592453	0	0	28.169	94.4777	CCL2
positive regulation of cell cycle arrest (GO:0071158)	2/82	0.034386	0.59281	0	0	6.87049	23.1543	BTG2;SOX4
negative regulation of receptor binding (GO:1900121)	1/11	0.0383734	0.593392	0	0	25.6082	83.4927	B2M
positive regulation of calcium ion import (GO:0090280)	1/10	0.0349458	0.594427	0	0	28.169	94.4777	CCL2
ephrin receptor signaling pathway (GO:0048013)	2/82	0.034386	0.59482	0	0	6.87049	23.1543	ACTB;MYL12A
negative regulation of nucleocytoplasmic transport (GO:0046823)	1/11	0.0383734	0.595196	0	0	25.6082	83.4927	SOX4
negative regulation of cellular protein catabolic process (GO:1903363)	1/10	0.0349458	0.596415	0	0	28.169	94.4777	ANXA2
negative regulation of NF-kappaB transcription factor activity (GO:0032088)	2/82	0.034386	0.596843	0	0	6.87049	23.1543	NFKBIA;TMSB4X
spinal cord development (GO:0021510)	1/11	0.0383734	0.597011	0	0	25.6082	83.4927	SOX4
membrane raft organization (GO:0031579)	1/10	0.0349458	0.598417	0	0	28.169	94.4777	ANXA2
miRNA mediated inhibition of translation (GO:0035278)	1/11	0.0383734	0.598836	0	0	25.6082	83.4927	ZFP36
DNA damage response, signal transduction by p53 class mediator (GO:0030330)	2/82	0.034386	0.59888	0	0	6.87049	23.1543	BTG2;SOX4
positive regulation of T cell receptor signaling pathway (GO:0050862)	1/10	0.0349458	0.600432	0	0	28.169	94.4777	RPS3
negative regulation of peptide secretion (GO:0002792)	1/11	0.0383734	0.600673	0	0	25.6082	83.4927	CD74
regulation of anatomical structure morphogenesis (GO:0022603)	2/82	0.034386	0.600931	0	0	6.87049	23.1543	SPARC;DAG1
negative regulation of translation, ncRNA-mediated (GO:0040033)	1/11	0.0383734	0.602522	0	0	25.6082	83.4927	ZFP36
negative regulation of translation (GO:0017148)	2/88	0.0391032	0.602851	0	0	6.40205	20.7526	BTG2;RPS3
positive regulation of protein secretion (GO:0050714)	2/82	0.034386	0.602996	0	0	6.87049	23.1543	ANKRD1;SOX4
positive regulation of cellular process (GO:0048522)	5/519	0.0371204	0.603265	0	0	2.71378	8.93807	RPS9;RPS19;JUNB;SOX4;HBEGF
negative regulation of release of sequestered calcium ion into cytosol (GO:0051280)	1/11	0.0383734	0.604381	0	0	25.6082	83.4927	CALM1
positive regulation of transcription from RNA polymerase II promoter in response to endoplasmic reticulum stress (GO:1990440)	1/11	0.0383734	0.606252	0	0	25.6082	83.4927	ATF3
retinal metabolic process (GO:0042574)	1/11	0.0383734	0.608135	0	0	25.6082	83.4927	RDH10
T cell differentiation in thymus (GO:0033077)	1/11	0.0383734	0.61003	0	0	25.6082	83.4927	ZFP36L1
microtubule anchoring (GO:0034453)	1/12	0.041789	0.61103	0	0	23.4742	74.5334	DAG1
negative regulation of intrinsic apoptotic signaling pathway in response to DNA damage by p53 class mediator (GO:1902166)	1/11	0.0383734	0.611936	0	0	25.6082	83.4927	CD74
regulation of catabolic process (GO:0009894)	1/12	0.041789	0.612786	0	0	23.4742	74.5334	ITGB1
central nervous system development (GO:0007417)	3/217	0.0420319	0.612826	0	0	3.89433	12.3424	COL4A1;NES;SOX4
negative regulation of ryanodine-sensitive calcium-release channel activity (GO:0060315)	1/11	0.0383734	0.613854	0	0	25.6082	83.4927	CALM1
positive regulation of T cell cytokine production (GO:0002726)	1/12	0.041789	0.614552	0	0	23.4742	74.5334	B2M
regulation of tumor necrosis factor biosynthetic process (GO:0042534)	1/11	0.0383734	0.615785	0	0	25.6082	83.4927	HSPB1
positive regulation of cellular metabolic process (GO:0031325)	2/92	0.042377	0.616096	0	0	6.1237	19.3579	NFKBIA;ANXA2
plasminogen activation (GO:0031639)	1/12	0.041789	0.616328	0	0	23.4742	74.5334	PLAT
atrial septum morphogenesis (GO:0060413)	1/11	0.0383734	0.617727	0	0	25.6082	83.4927	SOX4
regulation of cell communication by electrical coupling (GO:0010649)	1/12	0.041789	0.618115	0	0	23.4742	74.5334	CALM1
positive regulation of posttranscriptional gene silencing (GO:0060148)	1/11	0.0383734	0.619682	0	0	25.6082	83.4927	ZFP36
regulation of interleukin-2 biosynthetic process (GO:0045076)	1/12	0.041789	0.619911	0	0	23.4742	74.5334	ZFP36
positive regulation of cellular component biogenesis (GO:0044089)	2/87	0.0383006	0.620471	0	0	6.47564	21.1254	SDC4;RPS3
skeletal muscle cell differentiation (GO:0035914)	1/12	0.041789	0.621719	0	0	23.4742	74.5334	ANKRD1
negative regulation of DNA damage response, signal transduction by p53 class mediator (GO:0043518)	1/12	0.041789	0.623537	0	0	23.4742	74.5334	CD74
cellular response to arsenic-containing substance (GO:0071243)	1/12	0.041789	0.625365	0	0	23.4742	74.5334	ATF3
regulation of intrinsic apoptotic signaling pathway in response to DNA damage by p53 class mediator (GO:1902165)	1/12	0.041789	0.627204	0	0	23.4742	74.5334	CD74
negative regulation of vascular smooth muscle cell proliferation (GO:1904706)	1/12	0.041789	0.629055	0	0	23.4742	74.5334	TPM1
vesicle budding from membrane (GO:0006900)	1/12	0.041789	0.630916	0	0	23.4742	74.5334	ANXA2
retinol metabolic process (GO:0042572)	1/12	0.041789	0.632788	0	0	23.4742	74.5334	RDH10
detection of calcium ion (GO:0005513)	1/13	0.0451927	0.633567	0	0	21.6685	67.1033	CALM1
negative regulation of protein oligomerization (GO:0032460)	1/12	0.041789	0.634671	0	0	23.4742	74.5334	CRYAB
positive regulation of cholesterol efflux (GO:0010875)	1/13	0.0451927	0.635313	0	0	21.6685	67.1033	NFKBIA
positive regulation of interleukin-1 production (GO:0032732)	1/12	0.041789	0.636566	0	0	23.4742	74.5334	HSPB1
regulation of triglyceride biosynthetic process (GO:0010866)	1/13	0.0451927	0.637068	0	0	21.6685	67.1033	C3
regulation of nitric-oxide synthase biosynthetic process (GO:0051769)	1/12	0.041789	0.638472	0	0	23.4742	74.5334	CCL2
regulation of T cell cytokine production (GO:0002724)	1/13	0.0451927	0.638832	0	0	21.6685	67.1033	B2M
cardiac right ventricle morphogenesis (GO:0003215)	1/12	0.041789	0.640389	0	0	23.4742	74.5334	SOX4
steroid catabolic process (GO:0006706)	1/13	0.0451927	0.640607	0	0	21.6685	67.1033	SPP1
positive regulation of protein depolymerization (GO:1901881)	1/12	0.041789	0.642318	0	0	23.4742	74.5334	NES
prostanoid biosynthetic process (GO:0046457)	1/13	0.0451927	0.642391	0	0	21.6685	67.1033	CD74
cellular response to low-density lipoprotein particle stimulus (GO:0071404)	1/13	0.0451927	0.644186	0	0	21.6685	67.1033	ITGB1
negative regulation of macrophage derived foam cell differentiation (GO:0010745)	1/13	0.0451927	0.64599	0	0	21.6685	67.1033	NFKBIA
interleukin-1-mediated signaling pathway (GO:0070498)	2/95	0.0448975	0.647209	0	0	5.93032	18.404	NFKBIA;EGR1
regulation of interleukin-1 beta production (GO:0032651)	1/13	0.0451927	0.647805	0	0	21.6685	67.1033	HSPB1
antigen processing and presentation of exogenous peptide antigen (GO:0002478)	2/97	0.0466082	0.64807	0	0	5.80804	17.8073	CD74;DYNLL1
regulation of heart contraction (GO:0008016)	2/95	0.0448975	0.649043	0	0	5.93032	18.404	TPM1;CALM1
response to iron ion (GO:0010039)	1/13	0.0451927	0.64963	0	0	21.6685	67.1033	B2M
negative regulation of cell motility (GO:2000146)	2/97	0.0466082	0.64984	0	0	5.80804	17.8073	TPM1;DAG1
regulation of neural precursor cell proliferation (GO:2000177)	1/14	0.0485845	0.650726	0	0	20.1207	60.8541	NES
positive regulation of protein localization to membrane (GO:1905477)	2/95	0.0448975	0.650887	0	0	5.93032	18.404	ITGB1;DYNLL1
antigen processing and presentation of exogenous peptide antigen via MHC class II (GO:0019886)	2/97	0.0466082	0.651621	0	0	5.80804	17.8073	CD74;DYNLL1
regulation of lymphocyte differentiation (GO:0045619)	1/14	0.0485845	0.652439	0	0	20.1207	60.8541	ZFP36L1
negative regulation of secretion (GO:0051048)	1/14	0.0485845	0.65416	0	0	20.1207	60.8541	CD74
regulation of protein modification by small protein conjugation or removal (GO:1903320)	1/14	0.0485845	0.655891	0	0	20.1207	60.8541	EGR1
negative regulation of cellular component movement (GO:0051271)	1/15	0.0519644	0.656372	0	0	18.7793	55.5342	ACTN1
cellular response to metal ion (GO:0071248)	2/100	0.0492185	0.657493	0	0	5.6338	16.9661	FOS;B2M
positive regulation of heart rate (GO:0010460)	1/14	0.0485845	0.65763	0	0	20.1207	60.8541	TPM1
negative regulation of anoikis (GO:2000811)	1/15	0.0519644	0.658001	0	0	18.7793	55.5342	ITGB1
antigen processing and presentation of peptide antigen via MHC class II (GO:0002495)	2/98	0.0474724	0.658293	0	0	5.74878	17.52	CD74;DYNLL1
transmembrane receptor protein tyrosine kinase signaling pathway (GO:0007169)	4/396	0.052248	0.658325	0	0	2.84535	8.39879	HSPB1;PLAT;ACTB;MYL12A
negative regulation of intrinsic apoptotic signaling pathway by p53 class mediator (GO:1902254)	1/14	0.0485845	0.659379	0	0	20.1207	60.8541	CD74
regulation of peptide secretion (GO:0002791)	1/15	0.0519644	0.659637	0	0	18.7793	55.5342	CD74
negative regulation of DNA replication (GO:0008156)	1/16	0.0553324	0.659723	0	0	17.6056	50.9577	S100A11
mRNA transport (GO:0051028)	2/104	0.0527797	0.660135	0	0	5.41712	15.9351	ZFP36;ZFP36L1
regulation of response to external stimulus (GO:0032101)	2/107	0.0555094	0.66029	0	0	5.26524	15.2229	TMSB4X;CALM1
negative regulation of smooth muscle cell migration (GO:0014912)	1/14	0.0485845	0.661138	0	0	20.1207	60.8541	TPM1
regulation of intrinsic apoptotic signaling pathway in response to DNA damage (GO:1902229)	1/16	0.0553324	0.661268	0	0	17.6056	50.9577	RPS3
cytoplasmic sequestering of protein (GO:0051220)	1/15	0.0519644	0.661282	0	0	18.7793	55.5342	NFKBIA
positive regulation of vasculature development (GO:1904018)	2/104	0.0527797	0.661757	0	0	5.41712	15.9351	ITGB1;HSPB1
negative regulation of lipid storage (GO:0010888)	1/16	0.0553324	0.66282	0	0	17.6056	50.9577	NFKBIA
positive regulation of response to cytokine stimulus (GO:0060760)	1/14	0.0485845	0.662906	0	0	20.1207	60.8541	CD74
negative regulation of interleukin-2 production (GO:0032703)	1/15	0.0519644	0.662936	0	0	18.7793	55.5342	ZFP36
regulation of cellular response to stress (GO:0080135)	2/104	0.0527797	0.663387	0	0	5.41712	15.9351	CRYAB;IER3
regulation of glucose transport (GO:0010827)	1/16	0.0553324	0.66438	0	0	17.6056	50.9577	C3
positive regulation of collagen biosynthetic process (GO:0032967)	1/15	0.0519644	0.664597	0	0	18.7793	55.5342	VIM
regulation of gastrulation (GO:0010470)	1/14	0.0485845	0.664683	0	0	20.1207	60.8541	DAG1
myoblast differentiation (GO:0045445)	1/16	0.0553324	0.665947	0	0	17.6056	50.9577	ANKRD1
positive regulation of exosomal secretion (GO:1903543)	1/15	0.0519644	0.666267	0	0	18.7793	55.5342	SDC4
positive regulation of neural precursor cell proliferation (GO:2000179)	1/14	0.0485845	0.66647	0	0	20.1207	60.8541	NES
ruffle organization (GO:0031529)	1/16	0.0553324	0.667521	0	0	17.6056	50.9577	TPM1
regulation of protein ubiquitination (GO:0031396)	2/101	0.0501003	0.667524	0	0	5.57802	16.6991	RPS3;SOX4
positive regulation of cytokine production involved in immune response (GO:0002720)	1/15	0.0519644	0.667945	0	0	18.7793	55.5342	B2M
positive regulation of DNA damage response, signal transduction by p53 class mediator (GO:0043517)	1/14	0.0485845	0.668266	0	0	20.1207	60.8541	ANKRD1
negative regulation of transcription regulatory region DNA binding (GO:2000678)	1/16	0.0553324	0.669103	0	0	17.6056	50.9577	TMSB4X
transport along microtubule (GO:0010970)	1/15	0.0519644	0.669632	0	0	18.7793	55.5342	DYNLL1
cellular response to osmotic stress (GO:0071470)	1/14	0.0485845	0.670072	0	0	20.1207	60.8541	ZFP36L1
DNA methylation or demethylation (GO:0044728)	1/16	0.0553324	0.670692	0	0	17.6056	50.9577	FOS
positive regulation of collagen metabolic process (GO:0010714)	1/15	0.0519644	0.671327	0	0	18.7793	55.5342	VIM
branching involved in blood vessel morphogenesis (GO:0001569)	1/14	0.0485845	0.671888	0	0	20.1207	60.8541	COL4A1
positive regulation of antigen receptor-mediated signaling pathway (GO:0050857)	1/16	0.0553324	0.672289	0	0	17.6056	50.9577	RPS3
autonomic nervous system development (GO:0048483)	1/15	0.0519644	0.673031	0	0	18.7793	55.5342	SOX4
sympathetic nervous system development (GO:0048485)	1/16	0.0553324	0.673893	0	0	17.6056	50.9577	SOX4
negative regulation of intracellular transport (GO:0032387)	1/17	0.0586887	0.674523	0	0	16.57	46.9844	CRYAB
negative regulation of signal transduction by p53 class mediator (GO:1901797)	1/15	0.0519644	0.674744	0	0	18.7793	55.5342	CD74
regulation of exosomal secretion (GO:1903541)	1/16	0.0553324	0.675506	0	0	17.6056	50.9577	SDC4
platelet-derived growth factor receptor signaling pathway (GO:0048008)	1/17	0.0586887	0.676046	0	0	16.57	46.9844	PLAT
regulation of B cell differentiation (GO:0045577)	1/15	0.0519644	0.676465	0	0	18.7793	55.5342	ZFP36L1
regulation of stem cell proliferation (GO:0072091)	1/16	0.0553324	0.677126	0	0	17.6056	50.9577	ZFP36L1
positive regulation of cation transmembrane transport (GO:1904064)	1/17	0.0586887	0.677575	0	0	16.57	46.9844	TMSB4X
regulation of protein homooligomerization (GO:0032462)	1/15	0.0519644	0.678195	0	0	18.7793	55.5342	CRYAB
DNA alkylation (GO:0006305)	1/16	0.0553324	0.678753	0	0	17.6056	50.9577	FOS
negative regulation of interleukin-8 production (GO:0032717)	1/17	0.0586887	0.679112	0	0	16.57	46.9844	TMSB4X
positive regulation of response to wounding (GO:1903036)	1/15	0.0519644	0.679934	0	0	18.7793	55.5342	HBEGF
negative regulation of immune effector process (GO:0002698)	1/16	0.0553324	0.680389	0	0	17.6056	50.9577	RPS19
regulation of cardiac muscle contraction by regulation of the release of sequestered calcium ion (GO:0010881)	1/17	0.0586887	0.680655	0	0	16.57	46.9844	CALM1
negative regulation of peptidyl-threonine phosphorylation (GO:0010801)	1/15	0.0519644	0.681682	0	0	18.7793	55.5342	CALM1
positive regulation of cyclic nucleotide metabolic process (GO:0030801)	1/16	0.0553324	0.682032	0	0	17.6056	50.9577	CALM1
cellular response to gamma radiation (GO:0071480)	1/17	0.0586887	0.682206	0	0	16.57	46.9844	CRYAB
vitamin D metabolic process (GO:0042359)	1/15	0.0519644	0.683439	0	0	18.7793	55.5342	GC
fibrinolysis (GO:0042730)	1/16	0.0553324	0.683684	0	0	17.6056	50.9577	PLAT
positive regulation of signal transduction by p53 class mediator (GO:1901798)	1/17	0.0586887	0.683763	0	0	16.57	46.9844	ANKRD1
myeloid cell development (GO:0061515)	1/15	0.0519644	0.685205	0	0	18.7793	55.5342	ANXA2
positive regulation of calcium ion transmembrane transporter activity (GO:1901021)	1/17	0.0586887	0.685328	0	0	16.57	46.9844	CALM1
positive regulation of secretion (GO:0051047)	1/16	0.0553324	0.685343	0	0	17.6056	50.9577	SPP1
regulation of transcription, DNA-templated (GO:0006355)	10/1598	0.0550163	0.686425	0	0	1.76277	5.11225	EGR1;CD74;KLF6;ANKRD1;SPP1;ID3;FOS;JUNB;SOX4;ATF3
positive regulation of G-protein coupled receptor protein signaling pathway (GO:0045745)	1/17	0.0586887	0.6869	0	0	16.57	46.9844	C3
atrioventricular valve morphogenesis (GO:0003181)	1/15	0.0519644	0.68698	0	0	18.7793	55.5342	SOX4
lipopolysaccharide-mediated signaling pathway (GO:0031663)	1/16	0.0553324	0.687011	0	0	17.6056	50.9577	CCL2
negative regulation of calcium-mediated signaling (GO:0050849)	1/18	0.0620332	0.688164	0	0	15.6495	43.5068	CALM1
response to purine-containing compound (GO:0014074)	1/17	0.0586887	0.688479	0	0	16.57	46.9844	JUNB
neural tube development (GO:0021915)	1/16	0.0553324	0.688686	0	0	17.6056	50.9577	SOX4
positive regulation of peptidyl-lysine acetylation (GO:2000758)	1/15	0.0519644	0.688764	0	0	18.7793	55.5342	SOX4
positive regulation of angiogenesis (GO:0045766)	2/103	0.0518809	0.689449	0	0	5.46971	16.1838	ITGB1;HSPB1
focal adhesion assembly (GO:0048041)	1/18	0.0620332	0.689663	0	0	15.6495	43.5068	ACTN1
regulation of receptor recycling (GO:0001919)	1/17	0.0586887	0.690065	0	0	16.57	46.9844	ANXA2
prostaglandin biosynthetic process (GO:0001516)	1/18	0.0620332	0.691169	0	0	15.6495	43.5068	CD74
positive regulation of cholesterol transport (GO:0032376)	1/17	0.0586887	0.691659	0	0	16.57	46.9844	NFKBIA
response to organophosphorus (GO:0046683)	1/18	0.0620332	0.692681	0	0	15.6495	43.5068	JUNB
regulation of collagen biosynthetic process (GO:0032965)	1/17	0.0586887	0.69326	0	0	16.57	46.9844	VIM
regulation of oxidative stress-induced intrinsic apoptotic signaling pathway (GO:1902175)	1/18	0.0620332	0.6942	0	0	15.6495	43.5068	HSPB1
3'-UTR-mediated mRNA stabilization (GO:0070935)	1/17	0.0586887	0.694868	0	0	16.57	46.9844	ZFP36
cell-substrate adherens junction assembly (GO:0007045)	1/18	0.0620332	0.695726	0	0	15.6495	43.5068	ACTN1
regulation of protein sumoylation (GO:0033233)	1/17	0.0586887	0.696484	0	0	16.57	46.9844	EGR1
regulation of intracellular signal transduction (GO:1902531)	4/422	0.0630563	0.696485	0	0	2.67005	7.37929	AKAP12;TMSB4X;HSPB1;IER3
regulation of peptidase activity (GO:0052547)	1/18	0.0620332	0.697258	0	0	15.6495	43.5068	CSTB
cellular response to oxidative stress (GO:0034599)	2/115	0.0630238	0.697637	0	0	4.89896	13.5419	TPM1;FOS
positive regulation of programmed cell death (GO:0043068)	3/257	0.0634002	0.698772	0	0	3.28821	9.06984	ITGB1;ANKRD1;SOX4
DNA methylation (GO:0006306)	1/18	0.0620332	0.698797	0	0	15.6495	43.5068	FOS
positive regulation of cyclic nucleotide biosynthetic process (GO:0030804)	1/18	0.0620332	0.700343	0	0	15.6495	43.5068	CALM1
negative regulation of oxidative stress-induced intrinsic apoptotic signaling pathway (GO:1902176)	1/18	0.0620332	0.701896	0	0	15.6495	43.5068	HSPB1
regulation of cAMP biosynthetic process (GO:0030817)	1/19	0.0653659	0.702237	0	0	14.8258	40.4411	CALM1
glycogen catabolic process (GO:0005980)	1/18	0.0620332	0.703456	0	0	15.6495	43.5068	CALM1
regulation of transcription factor import into nucleus (GO:0042990)	1/19	0.0653659	0.703718	0	0	14.8258	40.4411	NFKBIA
calcium-mediated signaling using intracellular calcium source (GO:0035584)	1/18	0.0620332	0.705023	0	0	15.6495	43.5068	VCAM1
regulation of protein phosphorylation (GO:0001932)	3/261	0.0657691	0.705083	0	0	3.23782	8.81206	C3;CD74;HSPB1
osteoclast differentiation (GO:0030316)	1/19	0.0653659	0.705206	0	0	14.8258	40.4411	ANXA2
cellular protein modification process (GO:0006464)	7/1001	0.0641278	0.705268	0	0	1.96986	5.41097	C3;LGALS1;SPP1;CCL2;PLAT;IGFBP7;CP
plasma membrane bounded cell projection organization (GO:0120036)	2/118	0.0659263	0.705287	0	0	4.77441	12.9827	BTG2;TPM1
membrane protein ectodomain proteolysis (GO:0006509)	1/18	0.0620332	0.706596	0	0	15.6495	43.5068	DAG1
positive regulation of lipid storage (GO:0010884)	1/19	0.0653659	0.7067	0	0	14.8258	40.4411	C3
regulation of cholesterol efflux (GO:0010874)	1/18	0.0620332	0.708177	0	0	15.6495	43.5068	NFKBIA
muscle tissue morphogenesis (GO:0060415)	1/19	0.0653659	0.7082	0	0	14.8258	40.4411	ANKRD1
positive regulation of activated T cell proliferation (GO:0042104)	1/19	0.0653659	0.709707	0	0	14.8258	40.4411	RPS3
glucan catabolic process (GO:0009251)	1/18	0.0620332	0.709765	0	0	15.6495	43.5068	CALM1
positive regulation of pri-miRNA transcription from RNA polymerase II promoter (GO:1902895)	1/19	0.0653659	0.71122	0	0	14.8258	40.4411	FOS
modulation by virus of host morphology or physiology (GO:0019048)	1/18	0.0620332	0.71136	0	0	15.6495	43.5068	DAG1
cellular polysaccharide catabolic process (GO:0044247)	1/19	0.0653659	0.71274	0	0	14.8258	40.4411	CALM1
regulation of phosphorylation (GO:0042325)	2/119	0.0669037	0.712755	0	0	4.73429	12.8039	HSPB1;DYNLL1
regulation of cell differentiation (GO:0045595)	2/121	0.068873	0.712898	0	0	4.65604	12.4572	DAG1;JUNB
positive regulation of cAMP biosynthetic process (GO:0030819)	1/20	0.068687	0.71387	0	0	14.0845	37.7211	CALM1
brain development (GO:0007420)	2/119	0.0669037	0.714246	0	0	4.73429	12.8039	COL4A1;NES
negative regulation of phosphate metabolic process (GO:0045936)	1/19	0.0653659	0.714266	0	0	14.8258	40.4411	DYNLL1
negative regulation of cell migration (GO:0030336)	2/121	0.068873	0.714347	0	0	4.65604	12.4572	TPM1;DAG1
glial cell development (GO:0021782)	1/20	0.068687	0.715326	0	0	14.0845	37.7211	SOX4
primary alcohol metabolic process (GO:0034308)	1/19	0.0653659	0.715799	0	0	14.8258	40.4411	RDH10
positive regulation of gene silencing by miRNA (GO:2000637)	1/20	0.068687	0.716789	0	0	14.0845	37.7211	ZFP36
regulation of protein kinase A signaling (GO:0010738)	1/19	0.0653659	0.717338	0	0	14.8258	40.4411	AKAP12
regulation of cell development (GO:0060284)	1/20	0.068687	0.718258	0	0	14.0845	37.7211	RPS19
regulation of anoikis (GO:2000209)	1/20	0.068687	0.719733	0	0	14.0845	37.7211	ITGB1
androgen metabolic process (GO:0008209)	1/20	0.068687	0.721214	0	0	14.0845	37.7211	SPP1
actin filament organization (GO:0007015)	2/120	0.0678859	0.721712	0	0	4.69484	12.6288	ACTN1;TPM1
negative regulation of intracellular protein transport (GO:0090317)	1/20	0.068687	0.722701	0	0	14.0845	37.7211	SOX4
regulation of programmed cell death (GO:0043067)	3/268	0.0700119	0.72322	0	0	3.15325	8.38477	LGALS1;ACTN1;RPS3
mesoderm formation (GO:0001707)	1/20	0.068687	0.724194	0	0	14.0845	37.7211	ITGB1
regulation of macrophage activation (GO:0043030)	1/21	0.0719965	0.724651	0	0	13.4138	35.2936	CD74
regulation of vacuole organization (GO:0044088)	1/20	0.068687	0.725693	0	0	14.0845	37.7211	ANXA2
ERK1 and ERK2 cascade (GO:0070371)	1/21	0.0719965	0.726083	0	0	13.4138	35.2936	ZFP36L1
positive regulation of interleukin-2 production (GO:0032743)	1/20	0.068687	0.727199	0	0	14.0845	37.7211	RPS3
negative regulation of cytokine biosynthetic process (GO:0042036)	1/21	0.0719965	0.727521	0	0	13.4138	35.2936	ZFP36
negative regulation of innate immune response (GO:0045824)	1/20	0.068687	0.728711	0	0	14.0845	37.7211	RPS19
positive regulation of T cell mediated immunity (GO:0002711)	1/21	0.0719965	0.728965	0	0	13.4138	35.2936	B2M
ventricular cardiac muscle tissue development (GO:0003229)	1/21	0.0719965	0.730414	0	0	13.4138	35.2936	TPM1
tumor necrosis factor-mediated signaling pathway (GO:0033209)	2/123	0.0708614	0.730516	0	0	4.58033	12.1243	NFKBIA;TMSB4X
regulation of cardiac muscle contraction by calcium ion signaling (GO:0010882)	1/21	0.0719965	0.731869	0	0	13.4138	35.2936	CALM1
cellular response to hexose stimulus (GO:0071331)	1/21	0.0719965	0.73333	0	0	13.4138	35.2936	SOX4
positive regulation of leukocyte cell-cell adhesion (GO:1903039)	1/21	0.0719965	0.734796	0	0	13.4138	35.2936	CCL2
negative regulation of viral process (GO:0048525)	1/21	0.0719965	0.736269	0	0	13.4138	35.2936	ZFP36
ventricular septum morphogenesis (GO:0060412)	1/21	0.0719965	0.737747	0	0	13.4138	35.2936	SOX4
regulation of interleukin-2 production (GO:0032663)	1/21	0.0719965	0.739232	0	0	13.4138	35.2936	RPS3
NLS-bearing protein import into nucleus (GO:0006607)	1/22	0.0752944	0.740322	0	0	12.8041	33.1159	DAG1
positive regulation of cellular component movement (GO:0051272)	1/21	0.0719965	0.740722	0	0	13.4138	35.2936	RPS19
regulation of bone resorption (GO:0045124)	1/22	0.0752944	0.741751	0	0	12.8041	33.1159	SPP1
G2/M transition of mitotic cell cycle (GO:0000086)	2/126	0.073879	0.742134	0	0	4.47127	11.6491	DYNLL1;NES
regulation of DNA biosynthetic process (GO:2000278)	1/22	0.0752944	0.743186	0	0	12.8041	33.1159	ANKRD1
viral genome replication (GO:0019079)	1/22	0.0752944	0.744626	0	0	12.8041	33.1159	CCL2
positive regulation of NF-kappaB transcription factor activity (GO:0051092)	2/128	0.0759135	0.744974	0	0	4.40141	11.3475	NFKBIA;RPS3
regulation of ERBB signaling pathway (GO:1901184)	1/22	0.0752944	0.746072	0	0	12.8041	33.1159	HBEGF
positive regulation of protein autophosphorylation (GO:0031954)	1/22	0.0752944	0.747524	0	0	12.8041	33.1159	CALM1
regulation of calcium ion import (GO:0090279)	1/22	0.0752944	0.748981	0	0	12.8041	33.1159	CCL2
positive regulation of macromolecule metabolic process (GO:0010604)	3/276	0.0750097	0.749069	0	0	3.06185	7.93061	EGR1;ANXA2;RPS3
cell cycle G2/M phase transition (GO:0044839)	2/127	0.074894	0.74938	0	0	4.43607	11.4969	DYNLL1;NES
STAT cascade (GO:0097696)	1/22	0.0752944	0.750444	0	0	12.8041	33.1159	CCL2
positive regulation of protein kinase B signaling (GO:0051897)	2/127	0.074894	0.750852	0	0	4.43607	11.4969	ITGB1;HBEGF
membrane assembly (GO:0071709)	1/23	0.0785807	0.758029	0	0	12.2474	31.1528	ANXA2
positive regulation of ion transmembrane transporter activity (GO:0032414)	1/23	0.0785807	0.759464	0	0	12.2474	31.1528	TMSB4X
negative regulation of transcription factor import into nucleus (GO:0042992)	1/23	0.0785807	0.760906	0	0	12.2474	31.1528	NFKBIA
regulation of release of sequestered calcium ion into cytosol by sarcoplasmic reticulum (GO:0010880)	1/23	0.0785807	0.762352	0	0	12.2474	31.1528	CALM1
vitamin transport (GO:0051180)	1/23	0.0785807	0.763804	0	0	12.2474	31.1528	GC
regulation of monooxygenase activity (GO:0032768)	1/23	0.0785807	0.765262	0	0	12.2474	31.1528	CALM1
regulation of interleukin-8 secretion (GO:2000482)	1/23	0.0785807	0.766725	0	0	12.2474	31.1528	TMSB4X
negative regulation of viral transcription (GO:0032897)	1/23	0.0785807	0.768194	0	0	12.2474	31.1528	ZFP36
positive regulation of ATP metabolic process (GO:1903580)	1/23	0.0785807	0.769668	0	0	12.2474	31.1528	TMSB4X
negative regulation of oxidative stress-induced cell death (GO:1903202)	1/24	0.0818555	0.77068	0	0	11.7371	29.3756	HSPB1
negative regulation of intrinsic apoptotic signaling pathway in response to DNA damage (GO:1902230)	1/24	0.0818555	0.772104	0	0	11.7371	29.3756	CD74
negative regulation of T cell proliferation (GO:0042130)	1/24	0.0818555	0.773534	0	0	11.7371	29.3756	SDC4
transition metal ion homeostasis (GO:0055076)	1/24	0.0818555	0.774969	0	0	11.7371	29.3756	B2M
eosinophil chemotaxis (GO:0048245)	1/24	0.0818555	0.77641	0	0	11.7371	29.3756	CCL2
positive regulation of microtubule polymerization or depolymerization (GO:0031112)	1/24	0.0818555	0.777856	0	0	11.7371	29.3756	RPS3
camera-type eye development (GO:0043010)	1/24	0.0818555	0.779307	0	0	11.7371	29.3756	NES
cellular response to organic substance (GO:0071310)	2/133	0.0810771	0.780635	0	0	4.23594	10.6422	CCL2;JUNB
positive regulation of vascular endothelial growth factor production (GO:0010575)	1/24	0.0818555	0.780764	0	0	11.7371	29.3756	C3
positive regulation of immune effector process (GO:0002699)	1/24	0.0818555	0.782226	0	0	11.7371	29.3756	RPS19
positive regulation of dephosphorylation (GO:0035306)	1/24	0.0818555	0.783693	0	0	11.7371	29.3756	CALM1
positive regulation of microtubule polymerization (GO:0031116)	1/24	0.0818555	0.785166	0	0	11.7371	29.3756	RPS3
eosinophil migration (GO:0072677)	1/24	0.0818555	0.786645	0	0	11.7371	29.3756	CCL2
positive regulation of glucose transport (GO:0010828)	1/25	0.0851188	0.786886	0	0	11.2676	27.7601	C3
positive regulation of peptidyl-threonine phosphorylation (GO:0010800)	1/25	0.0851188	0.788314	0	0	11.2676	27.7601	CALM1
positive regulation of embryonic development (GO:0040019)	1/25	0.0851188	0.789748	0	0	11.2676	27.7601	DAG1
regulation of vascular smooth muscle cell proliferation (GO:1904705)	1/25	0.0851188	0.791186	0	0	11.2676	27.7601	TPM1
prostaglandin metabolic process (GO:0006693)	1/25	0.0851188	0.79263	0	0	11.2676	27.7601	CD74
regulation of ryanodine-sensitive calcium-release channel activity (GO:0060314)	1/25	0.0851188	0.794079	0	0	11.2676	27.7601	CALM1
glial cell differentiation (GO:0010001)	1/25	0.0851188	0.795533	0	0	11.2676	27.7601	SOX4
regulation of apoptotic signaling pathway (GO:2001233)	1/25	0.0851188	0.796993	0	0	11.2676	27.7601	RPS3
heterotypic cell-cell adhesion (GO:0034113)	1/25	0.0851188	0.798458	0	0	11.2676	27.7601	ITGB1
positive regulation of cAMP metabolic process (GO:0030816)	1/26	0.0883707	0.799567	0	0	10.8342	26.2862	CALM1
cellular response to vascular endothelial growth factor stimulus (GO:0035924)	1/25	0.0851188	0.799929	0	0	11.2676	27.7601	HSPB1
negative regulation of catalytic activity (GO:0043086)	1/26	0.0883707	0.800987	0	0	10.8342	26.2862	NES
regulation of rhodopsin mediated signaling pathway (GO:0022400)	1/26	0.0883707	0.802412	0	0	10.8342	26.2862	CALM1
regulation of T cell receptor signaling pathway (GO:0050856)	1/26	0.0883707	0.803842	0	0	10.8342	26.2862	RPS3
positive regulation of wound healing (GO:0090303)	1/26	0.0883707	0.805278	0	0	10.8342	26.2862	HBEGF
neuron differentiation (GO:0030182)	2/139	0.087413	0.806634	0	0	4.0531	9.87784	ID3;SOX4
regulation of NF-kappaB import into nucleus (GO:0042345)	1/26	0.0883707	0.806718	0	0	10.8342	26.2862	NFKBIA
regulation of pri-miRNA transcription from RNA polymerase II promoter (GO:1902893)	1/26	0.0883707	0.808164	0	0	10.8342	26.2862	FOS
fat-soluble vitamin metabolic process (GO:0006775)	1/26	0.0883707	0.809615	0	0	10.8342	26.2862	GC
response to gamma radiation (GO:0010332)	1/26	0.0883707	0.811071	0	0	10.8342	26.2862	CRYAB
regulation of muscle contraction (GO:0006937)	1/26	0.0883707	0.812533	0	0	10.8342	26.2862	TPM1
cytoskeleton-dependent intracellular transport (GO:0030705)	1/26	0.0883707	0.813999	0	0	10.8342	26.2862	DYNLL1
cell-cell adhesion via plasma-membrane adhesion molecules (GO:0098742)	2/142	0.0906355	0.818607	0	0	3.96747	9.52553	ITGB1;VCAM1
cellular response to glucose stimulus (GO:0071333)	1/27	0.0916112	0.821603	0	0	10.433	24.9369	SOX4
regulation of vascular endothelial growth factor production (GO:0010574)	1/27	0.0916112	0.823049	0	0	10.433	24.9369	C3
negative regulation of smooth muscle cell proliferation (GO:0048662)	1/27	0.0916112	0.824501	0	0	10.433	24.9369	TPM1
regulation of calcium ion transmembrane transporter activity (GO:1901019)	1/27	0.0916112	0.825957	0	0	10.433	24.9369	CALM1
regulation of cell morphogenesis (GO:0022604)	1/28	0.0948403	0.837319	0	0	10.0604	23.6978	SPARC
ventricular septum development (GO:0003281)	1/28	0.0948403	0.83877	0	0	10.0604	23.6978	SOX4
regulation of defense response to virus by virus (GO:0050690)	1/28	0.0948403	0.840226	0	0	10.0604	23.6978	B2M
antigen processing and presentation of peptide antigen via MHC class I (GO:0002474)	1/28	0.0948403	0.841687	0	0	10.0604	23.6978	B2M
regulation of mRNA processing (GO:0050684)	1/28	0.0948403	0.843154	0	0	10.0604	23.6978	ZFP36L1
regulation of lipid biosynthetic process (GO:0046890)	1/28	0.0948403	0.844625	0	0	10.0604	23.6978	C3
positive regulation of calcium-mediated signaling (GO:0050850)	1/28	0.0948403	0.846102	0	0	10.0604	23.6978	CALM1
cellular response to hydrogen peroxide (GO:0070301)	1/28	0.0948403	0.847583	0	0	10.0604	23.6978	RPS3
cellular response to ketone (GO:1901655)	1/28	0.0948403	0.84907	0	0	10.0604	23.6978	SPP1
regulation of myoblast differentiation (GO:0045661)	1/29	0.0980581	0.84956	0	0	9.71345	22.5565	ZFP36L1
negative regulation of lymphocyte proliferation (GO:0050672)	1/29	0.0980581	0.851004	0	0	9.71345	22.5565	SDC4
regulation of cellular biosynthetic process (GO:0031326)	1/29	0.0980581	0.852454	0	0	9.71345	22.5565	C3
positive regulation of transcription from RNA polymerase II promoter in response to stress (GO:0036003)	1/29	0.0980581	0.853909	0	0	9.71345	22.5565	ATF3
regulation of embryonic development (GO:0045995)	1/29	0.0980581	0.855369	0	0	9.71345	22.5565	DAG1
regulation of activated T cell proliferation (GO:0046006)	1/29	0.0980581	0.856833	0	0	9.71345	22.5565	RPS3
protein alkylation (GO:0008213)	1/29	0.0980581	0.858303	0	0	9.71345	22.5565	CALM1
nuclear-transcribed mRNA poly(A) tail shortening (GO:0000289)	1/29	0.0980581	0.859778	0	0	9.71345	22.5565	ZFP36
negative regulation of DNA biosynthetic process (GO:2000279)	1/30	0.101265	0.859823	0	0	9.38967	21.5025	ANKRD1
positive regulation of B cell proliferation (GO:0030890)	1/30	0.101265	0.861256	0	0	9.38967	21.5025	CD74
regulation of macrophage derived foam cell differentiation (GO:0010743)	1/29	0.0980581	0.861258	0	0	9.71345	22.5565	NFKBIA
protein stabilization (GO:0050821)	2/152	0.101623	0.861431	0	0	3.70645	8.47475	CRYAB;SOX4
ATP-dependent chromatin remodeling (GO:0043044)	1/30	0.101265	0.862694	0	0	9.38967	21.5025	ACTB
cellular response to cadmium ion (GO:0071276)	1/29	0.0980581	0.862742	0	0	9.71345	22.5565	FOS
positive regulation of protein insertion into mitochondrial membrane involved in apoptotic signaling pathway (GO:1900740)	1/30	0.101265	0.864136	0	0	9.38967	21.5025	DYNLL1
regulation of striated muscle contraction (GO:0006942)	1/29	0.0980581	0.864233	0	0	9.71345	22.5565	CALM1
regulation of cell migration (GO:0030334)	3/316	0.102243	0.865252	0	0	2.67427	6.09842	TPM1;DAG1;HBEGF
negative regulation of transferase activity (GO:0051348)	1/30	0.101265	0.865584	0	0	9.38967	21.5025	ZFP36
phosphatidylinositol 3-kinase signaling (GO:0014065)	1/30	0.101265	0.867036	0	0	9.38967	21.5025	ZFP36L1
cellular response to cAMP (GO:0071320)	1/30	0.101265	0.868493	0	0	9.38967	21.5025	ZFP36L1
aminoglycan metabolic process (GO:0006022)	1/30	0.101265	0.869956	0	0	9.38967	21.5025	SDC4
negative regulation of endothelial cell proliferation (GO:0001937)	1/30	0.101265	0.871423	0	0	9.38967	21.5025	SPARC
negative regulation of cation channel activity (GO:2001258)	1/30	0.101265	0.872895	0	0	9.38967	21.5025	CALM1
regulation of protein autophosphorylation (GO:0031952)	1/31	0.10446	0.873868	0	0	9.08678	20.5266	CALM1
regulation of protein insertion into mitochondrial membrane involved in apoptotic signaling pathway (GO:1900739)	1/30	0.101265	0.874372	0	0	9.38967	21.5025	DYNLL1
gene silencing by miRNA (GO:0035195)	1/31	0.10446	0.875302	0	0	9.08678	20.5266	ZFP36
positive regulation of cation channel activity (GO:2001259)	1/30	0.101265	0.875854	0	0	9.38967	21.5025	CALM1
anterograde axonal transport (GO:0008089)	1/31	0.10446	0.876742	0	0	9.08678	20.5266	HSPB1
regulation of protein export from nucleus (GO:0046825)	1/31	0.10446	0.878186	0	0	9.08678	20.5266	SOX4
positive regulation of release of sequestered calcium ion into cytosol (GO:0051281)	1/31	0.10446	0.879636	0	0	9.08678	20.5266	CALM1
response to cadmium ion (GO:0046686)	1/31	0.10446	0.88109	0	0	9.08678	20.5266	FOS
positive regulation of insulin secretion (GO:0032024)	1/31	0.10446	0.882548	0	0	9.08678	20.5266	SOX4
ribonucleoprotein complex assembly (GO:0022618)	2/156	0.106117	0.886281	0	0	3.61141	8.10115	RPS14;RPS19
aminoglycan catabolic process (GO:0006026)	1/32	0.107644	0.893183	0	0	8.80282	19.6208	SDC4
negative regulation of receptor activity (GO:2000272)	1/32	0.107644	0.894638	0	0	8.80282	19.6208	CALM1
central nervous system neuron differentiation (GO:0021953)	1/32	0.107644	0.896097	0	0	8.80282	19.6208	SOX4
negative regulation of calcium ion transmembrane transporter activity (GO:1901020)	1/32	0.107644	0.897562	0	0	8.80282	19.6208	CALM1
mRNA stabilization (GO:0048255)	1/33	0.110817	0.906249	0	0	8.53606	18.7783	ZFP36
positive regulation of organelle organization (GO:0010638)	1/33	0.110817	0.907703	0	0	8.53606	18.7783	ANXA2
positive regulation of intrinsic apoptotic signaling pathway (GO:2001244)	1/33	0.110817	0.909163	0	0	8.53606	18.7783	RPS3
cellular glucose homeostasis (GO:0001678)	1/33	0.110817	0.910627	0	0	8.53606	18.7783	SOX4
negative regulation of multi-organism process (GO:0043901)	1/33	0.110817	0.912095	0	0	8.53606	18.7783	ANXA2
negative regulation of intracellular signal transduction (GO:1902532)	2/161	0.11181	0.91291	0	0	3.49926	7.6667	TMSB4X;DAG1
positive regulation of calcium ion transport (GO:0051928)	1/33	0.110817	0.913569	0	0	8.53606	18.7783	CCL2
negative regulation of neurogenesis (GO:0050768)	1/33	0.110817	0.915047	0	0	8.53606	18.7783	ID3
positive regulation of cytokine-mediated signaling pathway (GO:0001961)	1/33	0.110817	0.91653	0	0	8.53606	18.7783	CD74
glycogen metabolic process (GO:0005977)	1/33	0.110817	0.918018	0	0	8.53606	18.7783	CALM1
positive regulation of I-kappaB kinase/NF-kappaB signaling (GO:0043123)	2/163	0.11411	0.921365	0	0	3.45632	7.50227	CD74;LGALS1
regulation of JUN kinase activity (GO:0043506)	1/34	0.113979	0.921765	0	0	8.285	17.9929	RPS3
regulation of wound healing (GO:0061041)	1/34	0.113979	0.923228	0	0	8.285	17.9929	HBEGF
positive regulation of exocytosis (GO:0045921)	1/34	0.113979	0.924696	0	0	8.285	17.9929	SDC4
negative regulation of T cell activation (GO:0050868)	1/34	0.113979	0.926169	0	0	8.285	17.9929	SDC4
ventricular cardiac muscle tissue morphogenesis (GO:0055010)	1/34	0.113979	0.927646	0	0	8.285	17.9929	TPM1
epithelial tube morphogenesis (GO:0060562)	1/34	0.113979	0.929128	0	0	8.285	17.9929	COL4A1
regulation of cardiac muscle contraction (GO:0055117)	1/35	0.11713	0.936853	0	0	8.04829	17.2594	CALM1
membrane protein proteolysis (GO:0033619)	1/35	0.11713	0.938323	0	0	8.04829	17.2594	DAG1
regulation of inflammatory response (GO:0050727)	2/166	0.117582	0.939001	0	0	3.39386	7.26495	NFKBIA;TMSB4X
regulation of microtubule polymerization (GO:0031113)	1/35	0.11713	0.939799	0	0	8.04829	17.2594	RPS3
negative regulation of protein kinase B signaling (GO:0051898)	1/35	0.11713	0.941279	0	0	8.04829	17.2594	DAG1
zymogen activation (GO:0031638)	1/36	0.120269	0.94131	0	0	7.82473	16.5729	PLAT
regulation of blood circulation (GO:1903522)	1/36	0.120269	0.942755	0	0	7.82473	16.5729	TPM1
positive regulation of peptide secretion (GO:0002793)	1/35	0.11713	0.942763	0	0	8.04829	17.2594	ANKRD1
cardiac muscle tissue development (GO:0048738)	1/36	0.120269	0.944206	0	0	7.82473	16.5729	ANKRD1
positive regulation of NIK/NF-kappaB signaling (GO:1901224)	1/35	0.11713	0.944253	0	0	8.04829	17.2594	RPS3
mRNA catabolic process (GO:0006402)	1/36	0.120269	0.945661	0	0	7.82473	16.5729	ZFP36
regulation of response to DNA damage stimulus (GO:2001020)	1/36	0.120269	0.94712	0	0	7.82473	16.5729	IER3
negative regulation of blood coagulation (GO:0030195)	1/36	0.120269	0.948584	0	0	7.82473	16.5729	PLAT
cardiac muscle contraction (GO:0060048)	1/36	0.120269	0.950052	0	0	7.82473	16.5729	TPM1
positive regulation of signaling (GO:0023056)	1/36	0.120269	0.951525	0	0	7.82473	16.5729	ANXA2
regulation of nitric-oxide synthase activity (GO:0050999)	1/36	0.120269	0.953003	0	0	7.82473	16.5729	CALM1
regulation of muscle cell differentiation (GO:0051147)	1/36	0.120269	0.954485	0	0	7.82473	16.5729	ZFP36L1
muscle cell differentiation (GO:0042692)	1/36	0.120269	0.955972	0	0	7.82473	16.5729	ANKRD1
Wnt signaling pathway, calcium modulating pathway (GO:0007223)	1/36	0.120269	0.957463	0	0	7.82473	16.5729	CALM1
regulation of receptor-mediated endocytosis (GO:0048259)	1/36	0.120269	0.958959	0	0	7.82473	16.5729	B2M
positive regulation of mitochondrial outer membrane permeabilization involved in apoptotic signaling pathway (GO:1901030)	1/37	0.123398	0.959908	0	0	7.61325	15.9295	DYNLL1
regulation of DNA repair (GO:0006282)	1/37	0.123398	0.961373	0	0	7.61325	15.9295	RPS3
positive regulation of stress fiber assembly (GO:0051496)	1/37	0.123398	0.962843	0	0	7.61325	15.9295	TPM1
regulation of peptidyl-threonine phosphorylation (GO:0010799)	1/37	0.123398	0.964318	0	0	7.61325	15.9295	CALM1
positive regulation of protein kinase activity (GO:0045860)	2/172	0.124606	0.967829	0	0	3.27547	6.82149	EGR1;CALM1
positive regulation of DNA repair (GO:0045739)	1/38	0.126516	0.97968	0	0	7.4129	15.3254	RPS3
positive regulation of innate immune response (GO:0045089)	1/38	0.126516	0.981169	0	0	7.4129	15.3254	RPS19
positive regulation of peptide hormone secretion (GO:0090277)	1/39	0.129622	0.999189	0	0	7.22282	14.7572	SOX4
skeletal muscle tissue development (GO:0007519)	1/39	0.129622	1	0	0	7.22282	14.7572	ANKRD1
ERBB2 signaling pathway (GO:0038128)	1/39	0.129622	1	0	0	7.22282	14.7572	HBEGF
negative regulation of transport (GO:0051051)	1/40	0.132718	1	0	0	7.04225	14.222	CRYAB
response to peptide hormone (GO:0043434)	1/40	0.132718	1	0	0	7.04225	14.222	ZFP36L1
intraciliary transport involved in cilium assembly (GO:0035735)	1/40	0.132718	1	0	0	7.04225	14.222	DYNLL1
negative regulation of epidermal growth factor receptor signaling pathway (GO:0042059)	1/40	0.132718	1	0	0	7.04225	14.222	ITGA1
regulation of protein dephosphorylation (GO:0035304)	1/40	0.132718	1	0	0	7.04225	14.222	CALM1
regulation of intracellular transport (GO:0032386)	1/40	0.132718	1	0	0	7.04225	14.222	CRYAB
regulation of viral transcription (GO:0046782)	1/40	0.132718	1	0	0	7.04225	14.222	ZFP36
regulation of ATPase activity (GO:0043462)	1/40	0.132718	1	0	0	7.04225	14.222	TPM1
JAK-STAT cascade (GO:0007259)	1/40	0.132718	1	0	0	7.04225	14.222	CCL2
negative regulation of cytokine secretion (GO:0050710)	1/40	0.132718	1	0	0	7.04225	14.222	TMSB4X
transcription, DNA-templated (GO:0006351)	3/356	0.132824	1	0	0	2.37379	4.79205	EGR1;TSC22D1;PTMA
cellular response to peptide (GO:1901653)	1/41	0.135803	1	0	0	6.87049	13.7173	ZFP36L1
regulation of calcium-mediated signaling (GO:0050848)	1/41	0.135803	1	0	0	6.87049	13.7173	CALM1
regulation of protein modification process (GO:0031399)	1/42	0.138877	1	0	0	6.70691	13.2405	HSPB1
regulation of mitotic cell cycle phase transition (GO:1901990)	2/184	0.138945	1	0	0	3.06185	6.0431	DYNLL1;ZFP36L1
negative regulation of transcription from RNA polymerase II promoter (GO:0000122)	4/565	0.140977	1	0	0	1.99427	3.90709	RPS14;ZFP36;JUNB;ATF3
regulation of B cell proliferation (GO:0030888)	1/43	0.141941	1	0	0	6.55093	12.7897	CD74
positive regulation of protein localization to plasma membrane (GO:1903078)	1/43	0.141941	1	0	0	6.55093	12.7897	ITGB1
negative regulation of protein metabolic process (GO:0051248)	1/43	0.141941	1	0	0	6.55093	12.7897	CRYAB
RNA catabolic process (GO:0006401)	1/43	0.141941	1	0	0	6.55093	12.7897	ZFP36
response to unfolded protein (GO:0006986)	1/43	0.141941	1	0	0	6.55093	12.7897	HSPB1
response to hydrogen peroxide (GO:0042542)	1/43	0.141941	1	0	0	6.55093	12.7897	RPS3
branching morphogenesis of an epithelial tube (GO:0048754)	1/43	0.141941	1	0	0	6.55093	12.7897	COL4A1
regulation of multicellular organismal development (GO:2000026)	1/43	0.141941	1	0	0	6.55093	12.7897	DAG1
receptor-mediated endocytosis (GO:0006898)	2/188	0.143803	1	0	0	2.9967	5.81154	ITGB1;SPARC
regulation of GTPase activity (GO:0043087)	2/188	0.143803	1	0	0	2.9967	5.81154	ITGB1;CCL2
heart contraction (GO:0060047)	1/44	0.144994	1	0	0	6.40205	12.3628	TPM1
lymphocyte chemotaxis (GO:0048247)	1/44	0.144994	1	0	0	6.40205	12.3628	CCL2
inorganic anion transport (GO:0015698)	1/44	0.144994	1	0	0	6.40205	12.3628	CLIC1
regulation of steroid biosynthetic process (GO:0050810)	1/44	0.144994	1	0	0	6.40205	12.3628	EGR1
positive regulation of actin filament bundle assembly (GO:0032233)	1/44	0.144994	1	0	0	6.40205	12.3628	TPM1
regulation of T cell activation (GO:0050863)	1/44	0.144994	1	0	0	6.40205	12.3628	CCL2
nucleus organization (GO:0006997)	1/45	0.148035	1	0	0	6.25978	11.9581	RPS19
positive regulation of GTPase activity (GO:0043547)	2/192	0.148698	1	0	0	2.93427	5.59226	ITGB1;CCL2
intraciliary transport (GO:0042073)	1/46	0.151067	1	0	0	6.1237	11.574	DYNLL1
cellular response to ionizing radiation (GO:0071479)	1/46	0.151067	1	0	0	6.1237	11.574	CRYAB
interleukin-12-mediated signaling pathway (GO:0035722)	1/46	0.151067	1	0	0	6.1237	11.574	ANXA2
protein methylation (GO:0006479)	1/46	0.151067	1	0	0	6.1237	11.574	CALM1
positive regulation of protein localization to cell periphery (GO:1904377)	1/46	0.151067	1	0	0	6.1237	11.574	ITGB1
pyruvate metabolic process (GO:0006090)	1/46	0.151067	1	0	0	6.1237	11.574	LDHB
aminoglycan biosynthetic process (GO:0006023)	1/46	0.151067	1	0	0	6.1237	11.574	SDC4
cellular response to interleukin-12 (GO:0071349)	1/46	0.151067	1	0	0	6.1237	11.574	ANXA2
response to glucose (GO:0009749)	1/47	0.154087	1	0	0	5.99341	11.2091	SOX4
positive regulation of organelle assembly (GO:1902117)	1/47	0.154087	1	0	0	5.99341	11.2091	SDC4
positive regulation of gene expression, epigenetic (GO:0045815)	1/47	0.154087	1	0	0	5.99341	11.2091	ACTB
polyol metabolic process (GO:0019751)	1/47	0.154087	1	0	0	5.99341	11.2091	CALM1
heterophilic cell-cell adhesion via plasma membrane cell adhesion molecules (GO:0007157)	1/47	0.154087	1	0	0	5.99341	11.2091	VCAM1
inositol phosphate metabolic process (GO:0043647)	1/47	0.154087	1	0	0	5.99341	11.2091	CALM1
positive regulation of tumor necrosis factor production (GO:0032760)	1/47	0.154087	1	0	0	5.99341	11.2091	HSPB1
cellular response to mechanical stimulus (GO:0071260)	1/48	0.157097	1	0	0	5.86854	10.862	ANKRD1
positive regulation of ERK1 and ERK2 cascade (GO:0070374)	2/201	0.159831	1	0	0	2.80289	5.13947	CD74;CCL2
antimicrobial humoral immune response mediated by antimicrobial peptide (GO:0061844)	1/49	0.160097	1	0	0	5.74878	10.5316	RPS19
regulation of release of sequestered calcium ion into cytosol (GO:0051279)	1/49	0.160097	1	0	0	5.74878	10.5316	CALM1
negative regulation of transcription, DNA-templated (GO:0045892)	5/813	0.161863	1	0	0	1.73241	3.15473	RPS14;ZFP36;ID3;JUNB;ATF3
regulation of MAPK cascade (GO:0043408)	2/203	0.162327	1	0	0	2.77527	5.04584	CD74;DAG1
regulation of cellular protein metabolic process (GO:0032268)	1/50	0.163086	1	0	0	5.6338	10.2168	NFKBIA
heart morphogenesis (GO:0003007)	1/50	0.163086	1	0	0	5.6338	10.2168	ANKRD1
receptor internalization (GO:0031623)	1/50	0.163086	1	0	0	5.6338	10.2168	ITGB1
positive regulation of JUN kinase activity (GO:0043507)	1/50	0.163086	1	0	0	5.6338	10.2168	RPS3
wound healing (GO:0042060)	1/50	0.163086	1	0	0	5.6338	10.2168	TPM1
positive regulation of phosphorylation (GO:0042327)	2/208	0.168597	1	0	0	2.70856	4.8219	C3;CD74
positive regulation of secretion by cell (GO:1903532)	1/52	0.169032	1	0	0	5.41712	9.62982	ANKRD1
neutrophil chemotaxis (GO:0030593)	1/53	0.17199	1	0	0	5.31491	9.35593	CCL2
embryonic organ development (GO:0048568)	1/53	0.17199	1	0	0	5.31491	9.35593	NES
cell morphogenesis involved in differentiation (GO:0000904)	1/54	0.174937	1	0	0	5.21648	9.09404	ACTN1
negative regulation of supramolecular fiber organization (GO:1902904)	1/54	0.174937	1	0	0	5.21648	9.09404	CRYAB
cytoplasmic translation (GO:0002181)	1/54	0.174937	1	0	0	5.21648	9.09404	RPS3
negative regulation of gene expression (GO:0010629)	4/618	0.176634	1	0	0	1.82324	3.1609	BTG2;ZFP36;RPS3;ID3
positive regulation of sequence-specific DNA binding transcription factor activity (GO:0051091)	2/215	0.177444	1	0	0	2.62037	4.5309	NFKBIA;RPS3
regulation of cell cycle (GO:0051726)	2/215	0.177444	1	0	0	2.62037	4.5309	ID3;JUNB
regulation of cellular catabolic process (GO:0031329)	1/55	0.177874	1	0	0	5.12164	8.84342	HSPB1
protein oligomerization (GO:0051259)	2/217	0.179985	1	0	0	2.59622	4.45221	RPS19;CRYAB
positive regulation of protein phosphorylation (GO:0001934)	3/412	0.180172	1	0	0	2.05114	3.51533	C3;CD74;CALM1
granulocyte chemotaxis (GO:0071621)	1/56	0.180801	1	0	0	5.03018	8.60342	CCL2
cellular defense response (GO:0006968)	1/56	0.180801	1	0	0	5.03018	8.60342	ITGB1
phosphatidylinositol-mediated signaling (GO:0048015)	1/56	0.180801	1	0	0	5.03018	8.60342	ZFP36L1
cellular iron ion homeostasis (GO:0006879)	1/56	0.180801	1	0	0	5.03018	8.60342	CP
positive regulation of protein transport (GO:0051222)	1/56	0.180801	1	0	0	5.03018	8.60342	ANKRD1
glycosaminoglycan catabolic process (GO:0006027)	1/56	0.180801	1	0	0	5.03018	8.60342	SDC4
I-kappaB kinase/NF-kappaB signaling (GO:0007249)	1/57	0.183717	1	0	0	4.94193	8.3734	NFKBIA
epidermal growth factor receptor signaling pathway (GO:0007173)	1/57	0.183717	1	0	0	4.94193	8.3734	HBEGF
positive regulation of cytokine production (GO:0001819)	2/220	0.183808	1	0	0	2.56082	4.33768	C3;RPS3
mitotic cell cycle phase transition (GO:0044772)	2/221	0.185085	1	0	0	2.54923	4.3004	DYNLL1;NES
neutrophil migration (GO:1990266)	1/58	0.186623	1	0	0	4.85673	8.15281	CCL2
receptor metabolic process (GO:0043112)	1/58	0.186623	1	0	0	4.85673	8.15281	ITGB1
regulation of epidermal growth factor receptor signaling pathway (GO:0042058)	1/58	0.186623	1	0	0	4.85673	8.15281	ITGA1
cell junction assembly (GO:0034329)	1/59	0.189519	1	0	0	4.77441	7.94111	ACTB
regulation of stress fiber assembly (GO:0051492)	1/60	0.192405	1	0	0	4.69484	7.73781	TPM1
cell chemotaxis (GO:0060326)	1/60	0.192405	1	0	0	4.69484	7.73781	HBEGF
muscle organ development (GO:0007517)	1/60	0.192405	1	0	0	4.69484	7.73781	HBEGF
positive regulation of protein binding (GO:0032092)	1/60	0.192405	1	0	0	4.69484	7.73781	B2M
striated muscle contraction (GO:0006941)	1/61	0.19528	1	0	0	4.61787	7.54246	TPM1
regulation of vesicle fusion (GO:0031338)	1/61	0.19528	1	0	0	4.61787	7.54246	ANXA2
regulation of DNA replication (GO:0006275)	1/61	0.19528	1	0	0	4.61787	7.54246	S100A11
glycosaminoglycan metabolic process (GO:0030203)	1/61	0.19528	1	0	0	4.61787	7.54246	SDC4
regulation of tumor necrosis factor production (GO:0032680)	1/61	0.19528	1	0	0	4.61787	7.54246	ZFP36
apoptotic process (GO:0006915)	2/231	0.197924	1	0	0	2.43888	3.95066	NFKBIA;IER3
negative regulation of peptidase activity (GO:0010466)	1/62	0.198146	1	0	0	4.54339	7.35462	CSTB
negative regulation of intrinsic apoptotic signaling pathway (GO:2001243)	1/62	0.198146	1	0	0	4.54339	7.35462	HSPB1
regulation of translational initiation (GO:0006446)	1/62	0.198146	1	0	0	4.54339	7.35462	HSPB1
kidney development (GO:0001822)	1/63	0.201001	1	0	0	4.47127	7.1739	SOX4
carbohydrate homeostasis (GO:0033500)	1/63	0.201001	1	0	0	4.47127	7.1739	SOX4
adenylate cyclase-inhibiting G-protein coupled receptor signaling pathway (GO:0007193)	1/63	0.201001	1	0	0	4.47127	7.1739	AKAP12
negative regulation of neuron apoptotic process (GO:0043524)	1/63	0.201001	1	0	0	4.47127	7.1739	CCL2
nuclear-transcribed mRNA catabolic process, deadenylation-dependent decay (GO:0000288)	1/63	0.201001	1	0	0	4.47127	7.1739	ZFP36
positive regulation of protein polymerization (GO:0032273)	1/64	0.203847	1	0	0	4.40141	6.99994	RPS3
positive regulation of endocytosis (GO:0045807)	1/64	0.203847	1	0	0	4.40141	6.99994	B2M
homophilic cell adhesion via plasma membrane adhesion molecules (GO:0007156)	1/64	0.203847	1	0	0	4.40141	6.99994	ITGB1
cellular response to decreased oxygen levels (GO:0036294)	1/64	0.203847	1	0	0	4.40141	6.99994	ZFP36L1
negative regulation of neuron differentiation (GO:0045665)	1/64	0.203847	1	0	0	4.40141	6.99994	ID3
positive regulation of cell adhesion (GO:0045785)	1/64	0.203847	1	0	0	4.40141	6.99994	TPM1
cellular response to type I interferon (GO:0071357)	1/65	0.206682	1	0	0	4.33369	6.83239	EGR1
regulation of cell division (GO:0051302)	1/65	0.206682	1	0	0	4.33369	6.83239	CALM1
type I interferon signaling pathway (GO:0060337)	1/65	0.206682	1	0	0	4.33369	6.83239	EGR1
negative regulation of blood vessel morphogenesis (GO:2000181)	1/65	0.206682	1	0	0	4.33369	6.83239	SPARC
negative regulation of epithelial cell proliferation (GO:0050680)	1/66	0.209508	1	0	0	4.26803	6.67091	SPARC
regulation of gene silencing by miRNA (GO:0060964)	1/67	0.212323	1	0	0	4.20433	6.51522	ZFP36
regulation of cardiac conduction (GO:1903779)	1/67	0.212323	1	0	0	4.20433	6.51522	CALM1
regulation of protein localization to plasma membrane (GO:1903076)	1/67	0.212323	1	0	0	4.20433	6.51522	ITGB1
regulation of epithelial to mesenchymal transition (GO:0010717)	1/68	0.215129	1	0	0	4.1425	6.36503	DAG1
response to interferon-gamma (GO:0034341)	1/68	0.215129	1	0	0	4.1425	6.36503	CCL2
regulation of endothelial cell migration (GO:0010594)	1/69	0.217925	1	0	0	4.08247	6.22007	SPARC
negative regulation of angiogenesis (GO:0016525)	1/69	0.217925	1	0	0	4.08247	6.22007	SPARC
regulation of ERK1 and ERK2 cascade (GO:0070372)	2/247	0.218684	1	0	0	2.28089	3.46725	CD74;CCL2
negative regulation of developmental process (GO:0051093)	1/70	0.220711	1	0	0	4.02414	6.08009	ANXA2
calcium-mediated signaling (GO:0019722)	1/70	0.220711	1	0	0	4.02414	6.08009	VCAM1
regulation of cation channel activity (GO:2001257)	1/71	0.223487	1	0	0	3.96747	5.94486	CALM1
defense response to Gram-negative bacterium (GO:0050829)	1/71	0.223487	1	0	0	3.96747	5.94486	RPS19
response to insulin (GO:0032868)	1/71	0.223487	1	0	0	3.96747	5.94486	ZFP36L1
response to metal ion (GO:0010038)	1/72	0.226253	1	0	0	3.91236	5.81417	CALM1
negative regulation of cell cycle (GO:0045786)	1/72	0.226253	1	0	0	3.91236	5.81417	BTG2
canonical Wnt signaling pathway (GO:0060070)	1/73	0.22901	1	0	0	3.85877	5.68779	SOX4
regulation of protein complex assembly (GO:0043254)	1/73	0.22901	1	0	0	3.85877	5.68779	RPS3
chloride transport (GO:0006821)	1/73	0.22901	1	0	0	3.85877	5.68779	CLIC1
positive regulation of epithelial cell migration (GO:0010634)	1/74	0.231757	1	0	0	3.80662	5.56554	SPARC
positive regulation of defense response (GO:0031349)	1/74	0.231757	1	0	0	3.80662	5.56554	NFKBIA
glucose homeostasis (GO:0042593)	1/74	0.231757	1	0	0	3.80662	5.56554	SOX4
regulation of gene expression, epigenetic (GO:0040029)	1/74	0.231757	1	0	0	3.80662	5.56554	ACTB
protein deubiquitination (GO:0016579)	2/257	0.231759	1	0	0	2.19214	3.20504	NFKBIA;ACTB
antigen processing and presentation of exogenous peptide antigen via MHC class I, TAP-dependent (GO:0002479)	1/75	0.234494	1	0	0	3.75587	5.44723	B2M
negative regulation of phosphorylation (GO:0042326)	1/75	0.234494	1	0	0	3.75587	5.44723	DYNLL1
C-terminal protein lipidation (GO:0006501)	1/75	0.234494	1	0	0	3.75587	5.44723	LY6E
regulation of defense response (GO:0031347)	1/75	0.234494	1	0	0	3.75587	5.44723	TMSB4X
protein modification by small protein removal (GO:0070646)	2/261	0.237004	1	0	0	2.15855	3.10761	NFKBIA;ACTB
transforming growth factor beta receptor signaling pathway (GO:0007179)	1/76	0.237222	1	0	0	3.70645	5.33269	FOS
nucleic acid-templated transcription (GO:0097659)	1/76	0.237222	1	0	0	3.70645	5.33269	PTMA
positive regulation of JNK cascade (GO:0046330)	1/76	0.237222	1	0	0	3.70645	5.33269	RPS3
positive regulation of apoptotic signaling pathway (GO:2001235)	1/76	0.237222	1	0	0	3.70645	5.33269	RPS3
positive regulation of cytoskeleton organization (GO:0051495)	1/77	0.23994	1	0	0	3.65831	5.22175	NES
regulation of cytokinesis (GO:0032465)	1/77	0.23994	1	0	0	3.65831	5.22175	CALM1
antigen processing and presentation of exogenous peptide antigen via MHC class I (GO:0042590)	1/78	0.242649	1	0	0	3.61141	5.11426	B2M
visual perception (GO:0007601)	1/78	0.242649	1	0	0	3.61141	5.11426	RDH10
extracellular matrix disassembly (GO:0022617)	1/78	0.242649	1	0	0	3.61141	5.11426	SPP1
negative regulation of inflammatory response (GO:0050728)	1/78	0.242649	1	0	0	3.61141	5.11426	RPS19
regulation of cellular response to heat (GO:1900034)	1/78	0.242649	1	0	0	3.61141	5.11426	CRYAB
negative regulation of mitotic cell cycle phase transition (GO:1901991)	1/79	0.245348	1	0	0	3.5657	5.01008	ZFP36L1
regulation of endothelial cell proliferation (GO:0001936)	1/79	0.245348	1	0	0	3.5657	5.01008	SPARC
response to calcium ion (GO:0051592)	1/79	0.245348	1	0	0	3.5657	5.01008	CALM1
regulation of phosphatidylinositol 3-kinase signaling (GO:0014066)	1/80	0.248038	1	0	0	3.52113	4.90907	IER3
regulation of protein serine/threonine kinase activity (GO:0071900)	1/80	0.248038	1	0	0	3.52113	4.90907	CALM1
spindle assembly (GO:0051225)	1/80	0.248038	1	0	0	3.52113	4.90907	RPS3
ERBB signaling pathway (GO:0038127)	1/80	0.248038	1	0	0	3.52113	4.90907	HBEGF
negative regulation of MAPK cascade (GO:0043409)	1/80	0.248038	1	0	0	3.52113	4.90907	DAG1
positive regulation of binding (GO:0051099)	1/81	0.250718	1	0	0	3.47766	4.81108	B2M
sensory perception of light stimulus (GO:0050953)	1/81	0.250718	1	0	0	3.47766	4.81108	RDH10
negative regulation of cell death (GO:0060548)	1/81	0.250718	1	0	0	3.47766	4.81108	SOX4
positive regulation of DNA metabolic process (GO:0051054)	1/82	0.253389	1	0	0	3.43525	4.71601	RPS3
C-terminal protein amino acid modification (GO:0018410)	1/82	0.253389	1	0	0	3.43525	4.71601	LY6E
negative regulation of neuron death (GO:1901215)	1/83	0.25605	1	0	0	3.39386	4.62373	CCL2
positive regulation of homeostatic process (GO:0032846)	1/83	0.25605	1	0	0	3.39386	4.62373	SPP1
regulation of neuron differentiation (GO:0045664)	1/84	0.258702	1	0	0	3.35345	4.53413	ID3
positive regulation of supramolecular fiber organization (GO:1902905)	1/84	0.258702	1	0	0	3.35345	4.53413	RPS3
protein modification process (GO:0036211)	1/84	0.258702	1	0	0	3.35345	4.53413	PLAT
regulation of cell cycle G2/M phase transition (GO:1902749)	1/84	0.258702	1	0	0	3.35345	4.53413	DYNLL1
regulation of peptidyl-tyrosine phosphorylation (GO:0050730)	1/85	0.261345	1	0	0	3.314	4.44711	CD74
T cell activation (GO:0042110)	1/88	0.269217	1	0	0	3.20102	4.2005	SOX4
positive regulation of protein complex assembly (GO:0031334)	1/88	0.269217	1	0	0	3.20102	4.2005	RPS3
regulation of neuron apoptotic process (GO:0043523)	1/89	0.271823	1	0	0	3.16506	4.12282	CCL2
DNA repair (GO:0006281)	2/288	0.272539	1	0	0	1.95618	2.54299	BTG2;RPS3
positive regulation of MAPK cascade (GO:0043410)	2/289	0.273856	1	0	0	1.94941	2.52478	CD74;CCL2
regulation of cell cycle process (GO:0010564)	1/90	0.27442	1	0	0	3.12989	4.04725	CALM1
positive regulation of response to external stimulus (GO:0032103)	1/90	0.27442	1	0	0	3.12989	4.04725	NFKBIA
regulation of cytokine-mediated signaling pathway (GO:0001959)	1/90	0.27442	1	0	0	3.12989	4.04725	CD74
cellular response to acid chemical (GO:0071229)	1/91	0.277007	1	0	0	3.0955	3.97373	EGR1
negative regulation of kinase activity (GO:0033673)	1/91	0.277007	1	0	0	3.0955	3.97373	HSPB1
cellular transition metal ion homeostasis (GO:0046916)	1/93	0.282155	1	0	0	3.02893	3.8325	CP
regulation of transcription from RNA polymerase II promoter in response to stress (GO:0043618)	1/93	0.282155	1	0	0	3.02893	3.8325	ATF3
axon development (GO:0061564)	1/94	0.284715	1	0	0	2.9967	3.76466	S100A6
regulation of B cell activation (GO:0050864)	1/95	0.287266	1	0	0	2.96516	3.69858	ZFP36L1
positive regulation of protein metabolic process (GO:0051247)	1/96	0.289808	1	0	0	2.93427	3.6342	NFKBIA
ciliary basal body-plasma membrane docking (GO:0097711)	1/96	0.289808	1	0	0	2.93427	3.6342	DYNLL1
mRNA metabolic process (GO:0016071)	1/97	0.292342	1	0	0	2.90402	3.57146	ZFP36
cell morphogenesis involved in neuron differentiation (GO:0048667)	1/97	0.292342	1	0	0	2.90402	3.57146	S100A6
regulation of insulin secretion (GO:0050796)	1/98	0.294866	1	0	0	2.87439	3.5103	SOX4
steroid metabolic process (GO:0008202)	1/99	0.297382	1	0	0	2.84535	3.45067	GC
glycosaminoglycan biosynthetic process (GO:0006024)	1/99	0.297382	1	0	0	2.84535	3.45067	SDC4
regulation of lipid metabolic process (GO:0019216)	1/100	0.299888	1	0	0	2.8169	3.39252	ANKRD1
regulation of kinase activity (GO:0043549)	1/101	0.302386	1	0	0	2.78901	3.3358	CD74
DNA metabolic process (GO:0006259)	2/314	0.30674	1	0	0	1.7942	2.12031	BTG2;RPS3
plasma membrane invagination (GO:0099024)	1/103	0.307356	1	0	0	2.73486	3.22644	C3
protein import into nucleus (GO:0006606)	1/103	0.307356	1	0	0	2.73486	3.22644	DAG1
positive regulation of lymphocyte activation (GO:0051251)	1/104	0.309827	1	0	0	2.70856	3.17373	CCL2
phagocytosis, engulfment (GO:0006911)	1/104	0.309827	1	0	0	2.70856	3.17373	C3
response to endoplasmic reticulum stress (GO:0034976)	1/106	0.314745	1	0	0	2.65745	3.072	ATF3
positive regulation of cellular component organization (GO:0051130)	1/106	0.314745	1	0	0	2.65745	3.072	RPS3
regulation of protein secretion (GO:0050708)	1/107	0.31719	1	0	0	2.63262	3.02291	ANKRD1
viral life cycle (GO:0019058)	1/107	0.31719	1	0	0	2.63262	3.02291	CCL2
regulation of protein activation cascade (GO:2000257)	1/108	0.319627	1	0	0	2.60824	2.97496	C3
monocarboxylic acid metabolic process (GO:0032787)	1/108	0.319627	1	0	0	2.60824	2.97496	LDHB
negative regulation of hydrolase activity (GO:0051346)	1/108	0.319627	1	0	0	2.60824	2.97496	CSTB
circulatory system development (GO:0072359)	1/109	0.322056	1	0	0	2.58431	2.92811	SOX4
regulation of cell motility (GO:2000145)	1/109	0.322056	1	0	0	2.58431	2.92811	HBEGF
regulation of complement activation (GO:0030449)	1/109	0.322056	1	0	0	2.58431	2.92811	C3
positive regulation of cysteine-type endopeptidase activity involved in apoptotic process (GO:0043280)	1/109	0.322056	1	0	0	2.58431	2.92811	RPS3
Wnt signaling pathway (GO:0016055)	1/109	0.322056	1	0	0	2.58431	2.92811	SOX4
regulation of Wnt signaling pathway (GO:0030111)	1/109	0.322056	1	0	0	2.58431	2.92811	SOX4
negative regulation of protein kinase activity (GO:0006469)	1/109	0.322056	1	0	0	2.58431	2.92811	HSPB1
macroautophagy (GO:0016236)	1/110	0.324475	1	0	0	2.56082	2.88232	DYNLL1
cellular response to insulin stimulus (GO:0032869)	1/110	0.324475	1	0	0	2.56082	2.88232	ZFP36L1
positive regulation of establishment of protein localization to mitochondrion (GO:1903749)	1/110	0.324475	1	0	0	2.56082	2.88232	DYNLL1
cellular response to peptide hormone stimulus (GO:0071375)	1/110	0.324475	1	0	0	2.56082	2.88232	ZFP36L1
cellular response to DNA damage stimulus (GO:0006974)	2/329	0.326358	1	0	0	1.7124	1.91748	BTG2;RPS3
positive regulation of kinase activity (GO:0033674)	1/113	0.331684	1	0	0	2.49283	2.75102	CD74
positive regulation of developmental process (GO:0051094)	1/113	0.331684	1	0	0	2.49283	2.75102	JUNB
positive regulation of canonical Wnt signaling pathway (GO:0090263)	1/113	0.331684	1	0	0	2.49283	2.75102	SOX4
regulation of humoral immune response (GO:0002920)	1/113	0.331684	1	0	0	2.49283	2.75102	C3
regulation of immune effector process (GO:0002697)	1/114	0.33407	1	0	0	2.47097	2.70918	C3
protein O-linked glycosylation (GO:0006493)	1/115	0.336448	1	0	0	2.44948	2.66825	DAG1
positive regulation of peptidyl-tyrosine phosphorylation (GO:0050731)	1/116	0.338817	1	0	0	2.42836	2.62821	CD74
chromatin remodeling (GO:0006338)	1/116	0.338817	1	0	0	2.42836	2.62821	ACTB
positive regulation of protein serine/threonine kinase activity (GO:0071902)	1/118	0.34353	1	0	0	2.3872	2.55068	CALM1
positive regulation of B cell activation (GO:0050871)	1/119	0.345875	1	0	0	2.36714	2.51315	CD74
macromolecular complex assembly (GO:0065003)	1/120	0.348211	1	0	0	2.34742	2.4764	CD74
regulation of acute inflammatory response (GO:0002673)	1/121	0.350539	1	0	0	2.32802	2.44042	C3
stimulatory C-type lectin receptor signaling pathway (GO:0002223)	1/121	0.350539	1	0	0	2.32802	2.44042	NFKBIA
innate immune response activating cell surface receptor signaling pathway (GO:0002220)	1/124	0.357473	1	0	0	2.27169	2.33688	NFKBIA
negative regulation of multicellular organismal process (GO:0051241)	1/125	0.359768	1	0	0	2.25352	2.30376	RPS19
G-protein coupled receptor signaling pathway, coupled to cyclic nucleotide second messenger (GO:0007187)	1/125	0.359768	1	0	0	2.25352	2.30376	CCL2
vesicle organization (GO:0016050)	1/127	0.364334	1	0	0	2.21803	2.23951	ANXA2
non-canonical Wnt signaling pathway (GO:0035567)	1/127	0.364334	1	0	0	2.21803	2.23951	CALM1
protein lipidation (GO:0006497)	1/127	0.364334	1	0	0	2.21803	2.23951	LY6E
regulation of protein processing (GO:0070613)	1/128	0.366605	1	0	0	2.2007	2.20834	C3
regulation of macromolecule metabolic process (GO:0060255)	1/129	0.368868	1	0	0	2.18364	2.17778	ZFP36L1
generation of neurons (GO:0048699)	1/130	0.371123	1	0	0	2.16685	2.14782	ID3
protein glycosylation (GO:0006486)	1/130	0.371123	1	0	0	2.16685	2.14782	DAG1
cellular response to hypoxia (GO:0071456)	1/132	0.37561	1	0	0	2.13402	2.08964	ZFP36L1
Fc-gamma receptor signaling pathway involved in phagocytosis (GO:0038096)	1/133	0.377841	1	0	0	2.11797	2.06138	ACTB
adenylate cyclase-modulating G-protein coupled receptor signaling pathway (GO:0007188)	1/134	0.380065	1	0	0	2.10217	2.03366	AKAP12
Fc-gamma receptor signaling pathway (GO:0038094)	1/134	0.380065	1	0	0	2.10217	2.03366	ACTB
Fc receptor mediated stimulatory signaling pathway (GO:0002431)	1/135	0.38228	1	0	0	2.08659	2.00647	ACTB
phagocytosis (GO:0006909)	1/135	0.38228	1	0	0	2.08659	2.00647	C3
positive regulation of transferase activity (GO:0051347)	1/137	0.386688	1	0	0	2.05613	1.95361	CD74
organelle assembly (GO:0070925)	2/376	0.386767	1	0	0	1.49835	1.42333	RPS3;DYNLL1
response to cytokine (GO:0034097)	1/138	0.38888	1	0	0	2.04123	1.92791	JUNB
regulation of primary metabolic process (GO:0080090)	1/139	0.391065	1	0	0	2.02655	1.90269	ANKRD1
regulation of cellular component organization (GO:0051128)	1/140	0.393242	1	0	0	2.01207	1.87793	SPARC
positive regulation of Wnt signaling pathway (GO:0030177)	1/140	0.393242	1	0	0	2.01207	1.87793	SOX4
neuron development (GO:0048666)	1/144	0.401873	1	0	0	1.95618	1.78329	BTG2
transmembrane receptor protein serine/threonine kinase signaling pathway (GO:0007178)	1/144	0.401873	1	0	0	1.95618	1.78329	FOS
skeletal system development (GO:0001501)	1/146	0.406143	1	0	0	1.92938	1.73847	SOX4
regulation of protein kinase activity (GO:0045859)	1/147	0.408266	1	0	0	1.91626	1.71665	HSPB1
regulation of G2/M transition of mitotic cell cycle (GO:0010389)	1/149	0.412491	1	0	0	1.89054	1.67415	DYNLL1
heart development (GO:0007507)	1/149	0.412491	1	0	0	1.89054	1.67415	SOX4
negative regulation of cell differentiation (GO:0045596)	1/150	0.414592	1	0	0	1.87793	1.65344	NFKBIA
neuron projection morphogenesis (GO:0048812)	1/163	0.441244	1	0	0	1.72816	1.41391	S100A6
T cell receptor signaling pathway (GO:0050852)	1/163	0.441244	1	0	0	1.72816	1.41391	NFKBIA
regulation of mitotic cell cycle (GO:0007346)	1/165	0.445237	1	0	0	1.70721	1.38139	BTG2
neuron projection development (GO:0031175)	1/167	0.449202	1	0	0	1.68677	1.34989	BTG2
positive regulation of MAP kinase activity (GO:0043406)	1/177	0.468609	1	0	0	1.59147	1.20631	RPS3
positive regulation of cell motility (GO:2000147)	1/179	0.472409	1	0	0	1.57369	1.18012	HBEGF
ER to Golgi vesicle-mediated transport (GO:0006888)	1/180	0.474299	1	0	0	1.56495	1.16732	DYNLL1
phosphate-containing compound metabolic process (GO:0006796)	1/183	0.479929	1	0	0	1.53929	1.13002	CALM1
nervous system development (GO:0007399)	2/455	0.482596	1	0	0	1.2382	0.90212	CXCL1;NES
protein homooligomerization (GO:0051260)	1/190	0.492834	1	0	0	1.48258	1.04905	CRYAB
cilium organization (GO:0044782)	1/192	0.496463	1	0	0	1.46714	1.02736	DYNLL1
regulation of gene expression (GO:0010468)	4/1037	0.505987	1	0	0	1.08656	0.74021	EGR1;RPS3;SOX4;ZFP36L1
positive regulation of multicellular organismal process (GO:0051240)	1/202	0.514228	1	0	0	1.39451	0.927471	RPS19
regulation of autophagy (GO:0010506)	1/203	0.51597	1	0	0	1.38764	0.918209	HSPB1
transcription from RNA polymerase II promoter (GO:0006366)	2/485	0.516592	1	0	0	1.16161	0.767245	EGR1;TSC22D1
regulation of canonical Wnt signaling pathway (GO:0060828)	1/213	0.533055	1	0	0	1.32249	0.832018	SOX4
positive regulation of cell migration (GO:0030335)	1/221	0.546294	1	0	0	1.27462	0.770629	HBEGF
axonogenesis (GO:0007409)	1/223	0.549546	1	0	0	1.26318	0.756222	S100A6
plasma membrane bounded cell projection assembly (GO:0120031)	1/241	0.577795	1	0	0	1.16884	0.641151	DYNLL1
defense response to bacterium (GO:0042742)	1/241	0.577795	1	0	0	1.16884	0.641151	RPS19
antigen receptor-mediated signaling pathway (GO:0050851)	1/257	0.601434	1	0	0	1.09607	0.557285	NFKBIA
endocytosis (GO:0006897)	1/263	0.609958	1	0	0	1.07107	0.529497	SPARC
Golgi vesicle transport (GO:0048193)	1/271	0.621044	1	0	0	1.03945	0.495144	DYNLL1
negative regulation of signal transduction (GO:0009968)	1/283	0.637094	1	0	0	0.995372	0.448752	HBEGF
cilium assembly (GO:0060271)	1/288	0.643582	1	0	0	0.978091	0.431051	DYNLL1
proteolysis (GO:0006508)	1/291	0.647419	1	0	0	0.968007	0.420852	PLAT
protein transport (GO:0015031)	1/326	0.68929	1	0	0	0.86408	0.321518	CD74
cellular protein localization (GO:0034613)	1/327	0.690412	1	0	0	0.861438	0.319134	CD74
intracellular protein transport (GO:0006886)	1/347	0.712018	1	0	0	0.811787	0.275725	CD74
phosphorylation (GO:0016310)	1/386	0.749962	1	0	0	0.729767	0.209978	CCL2
vesicle-mediated transport (GO:0016192)	1/410	0.770816	1	0	0	0.687049	0.178843	ANXA2
negative regulation of nucleic acid-templated transcription (GO:1903507)	1/444	0.797453	1	0	0	0.634437	0.143594	ID3
protein phosphorylation (GO:0006468)	1/470	0.81574	1	0	0	0.599341	0.122061	CCL2
regulation of nucleic acid-templated transcription (GO:1903506)	1/607	0.888319	1	0	0	0.464069	0.0549569	SOX4
regulation of cellular macromolecule biosynthetic process (GO:2000112)	1/631	0.897735	1	0	0	0.446419	0.0481596	SOX4

## Sheet: Down DA-PT (IRI) vs PT (IRI)
Term	Overlap	P-value	Adjusted P-value	Old P-value	Old Adjusted P-value	Odds Ratio	Combined Score	Genes
hexose metabolic process (GO:0019318)	5/45	6.55473e-08	0.000334488	0	0	47.2813	782.056	AKR1A1;SORD;ALDOB;PCK1;FBP1
fructose metabolic process (GO:0006000)	3/7	4.22861e-07	0.000719287	0	0	182.371	2676.51	SORD;ALDOB;FBP1
glucose metabolic process (GO:0006006)	5/64	3.95678e-07	0.00100957	0	0	33.2447	490.115	AKR1A1;SORD;ALDOB;PCK1;FBP1
mitochondrial ATP synthesis coupled electron transport (GO:0042775)	5/85	1.64082e-06	0.00209328	0	0	25.0313	333.425	MT-ND4;MT-ND5;MT-CO1;MT-ND2;MT-ND1
respiratory electron transport chain (GO:0022904)	5/94	2.70289e-06	0.00275857	0	0	22.6347	290.203	MT-ND4;MT-ND5;MT-CO1;MT-ND2;MT-ND1
hexose biosynthetic process (GO:0019319)	4/44	3.39115e-06	0.00288418	0	0	38.6847	487.209	SORD;ALDOB;PCK1;FBP1
mitochondrial electron transport, NADH to ubiquinone (GO:0006120)	4/46	4.06249e-06	0.00296155	0	0	37.0028	459.342	MT-ND4;MT-ND5;MT-ND2;MT-ND1
mitochondrial respiratory chain complex I assembly (GO:0032981)	4/64	1.53359e-05	0.00782592	0	0	26.5957	294.822	MT-ND4;MT-ND5;MT-ND2;MT-ND1
mitochondrial respiratory chain complex I biogenesis (GO:0097031)	4/64	1.53359e-05	0.00869547	0	0	26.5957	294.822	MT-ND4;MT-ND5;MT-ND2;MT-ND1
NADH dehydrogenase complex assembly (GO:0010257)	4/64	1.53359e-05	0.00978241	0	0	26.5957	294.822	MT-ND4;MT-ND5;MT-ND2;MT-ND1
mitochondrial respiratory chain complex assembly (GO:0033108)	4/97	7.90227e-05	0.0366594	0	0	17.5477	165.752	MT-ND4;MT-ND5;MT-ND2;MT-ND1
gluconeogenesis (GO:0006094)	3/41	0.000121776	0.0478018	0	0	31.1365	280.643	ALDOB;PCK1;FBP1
fructose 1,6-bisphosphate metabolic process (GO:0030388)	2/7	0.000112658	0.0479076	0	0	121.581	1105.31	ALDOB;FBP1
energy coupled proton transmembrane transport, against electrochemical gradient (GO:0015988)	2/10	0.000240327	0.0875991	0	0	85.1064	709.235	MT-ND4;MT-CO1
cellular respiration (GO:0045333)	3/57	0.000325569	0.0977283	0	0	22.3964	179.842	MT-ND4;MT-CO1;MT-ND1
cellular iron ion homeostasis (GO:0006879)	3/56	0.000308942	0.0985332	0	0	22.7964	184.248	MT-RNR2;FTH1;HMOX1
import across plasma membrane (GO:0098739)	2/11	0.000293293	0.0997783	0	0	77.3694	629.349	FXYD2;LRP2
iron ion homeostasis (GO:0055072)	3/63	0.000437517	0.124036	0	0	20.2634	156.725	MT-RNR2;FTH1;HMOX1
hydrogen peroxide catabolic process (GO:0042744)	2/14	0.000483091	0.129748	0	0	60.7903	464.152	PRDX5;GPX3
vitamin D metabolic process (GO:0042359)	2/15	0.000556579	0.142011	0	0	56.7376	425.175	LRP2;LGMN
organonitrogen compound biosynthetic process (GO:1901566)	4/181	0.000854189	0.207568	0	0	9.40402	66.4428	MT-RNR1;AKR1A1;CHPT1;ASS1
hydrogen peroxide metabolic process (GO:0042743)	2/20	0.000999632	0.231869	0	0	42.5532	293.963	PRDX5;GPX3
cellular transition metal ion homeostasis (GO:0046916)	3/93	0.00136096	0.301956	0	0	13.7268	90.5911	MT-RNR2;FTH1;HMOX1
fat-soluble vitamin metabolic process (GO:0006775)	2/26	0.00169462	0.345905	0	0	32.7332	208.848	LRP2;LGMN
steroid metabolic process (GO:0008202)	3/99	0.00162889	0.346343	0	0	12.8949	82.7834	LRP2;CYP2E1;LGMN
fatty acid metabolic process (GO:0006631)	3/106	0.00198063	0.374339	0	0	12.0434	74.9619	ACOX1;GGT1;SLC27A2
aerobic respiration (GO:0009060)	2/28	0.00196508	0.385685	0	0	30.3951	189.429	MT-ND4;MT-CO1
cellular response to oxidative stress (GO:0034599)	3/115	0.00249777	0.455218	0	0	11.1008	66.5202	PRDX5;GPX3;HMOX1
inorganic anion transport (GO:0015698)	2/44	0.00480179	0.84495	0	0	19.3424	103.264	SLC13A1;SLC34A1
pyruvate metabolic process (GO:0006090)	2/46	0.0052379	0.890967	0	0	18.5014	97.1662	ALDOB;PCK1
fatty acid oxidation (GO:0019395)	2/50	0.00616259	0.982741	0	0	17.0213	86.6257	ACOX1;SLC27A2
fatty acid beta-oxidation (GO:0006635)	2/50	0.00616259	1	0	0	17.0213	86.6257	ACOX1;SLC27A2
long-chain fatty acid metabolic process (GO:0001676)	2/55	0.00741514	1	0	0	15.4739	75.8875	ACOX1;SLC27A2
protein homotetramerization (GO:0051289)	2/57	0.0079457	1	0	0	14.9309	72.193	GPX3;FBP1
sodium ion transport (GO:0006814)	2/58	0.00821724	1	0	0	14.6735	70.4552	SLC13A1;SLC5A2
dicarboxylic acid metabolic process (GO:0043648)	2/59	0.00849291	1	0	0	14.4248	68.785	GGT1;ASS1
response to reactive oxygen species (GO:0000302)	2/60	0.00877271	1	0	0	14.1844	67.1789	PRDX5;HMOX1
phosphate-containing compound metabolic process (GO:0006796)	3/183	0.00909556	1	0	0	6.97593	32.7867	MIOX;ALDOB;FBP1
protein homooligomerization (GO:0051260)	3/190	0.0100705	1	0	0	6.71892	30.8946	GPX3;HMOX1;FBP1
monoterpenoid metabolic process (GO:0016098)	1/6	0.014019	1	0	0	70.922	302.648	CYP2E1
positive regulation of vesicle fusion (GO:0031340)	1/6	0.014019	1	0	0	70.922	302.648	TMEM27
response to lead ion (GO:0010288)	1/6	0.014019	1	0	0	70.922	302.648	SLC34A1
negative regulation of coenzyme metabolic process (GO:0051198)	1/6	0.014019	1	0	0	70.922	302.648	FBP1
aldehyde catabolic process (GO:0046185)	1/6	0.014019	1	0	0	70.922	302.648	AKR1A1
ventricular compact myocardium morphogenesis (GO:0003223)	1/6	0.014019	1	0	0	70.922	302.648	LRP2
negative regulation of glycolytic process (GO:0045820)	1/6	0.014019	1	0	0	70.922	302.648	FBP1
arginine biosynthetic process (GO:0006526)	1/6	0.014019	1	0	0	70.922	302.648	ASS1
amine metabolic process (GO:0009308)	1/6	0.014019	1	0	0	70.922	302.648	INMT
regulation of lysosomal protein catabolic process (GO:1905165)	1/6	0.014019	1	0	0	70.922	302.648	LRP2
aggrephagy (GO:0035973)	1/6	0.014019	1	0	0	70.922	302.648	SQSTM1
citrulline metabolic process (GO:0000052)	1/6	0.014019	1	0	0	70.922	302.648	ASS1
cellular response to magnesium ion (GO:0071286)	1/6	0.014019	1	0	0	70.922	302.648	FBP1
fructose 6-phosphate metabolic process (GO:0006002)	1/6	0.014019	1	0	0	70.922	302.648	FBP1
positive regulation of blood vessel endothelial cell proliferation involved in sprouting angiogenesis (GO:1903589)	1/7	0.0163368	1	0	0	60.7903	250.112	HMOX1
sulfur amino acid biosynthetic process (GO:0000097)	1/7	0.0163368	1	0	0	60.7903	250.112	GGT1
cellular response to laminar fluid shear stress (GO:0071499)	1/7	0.0163368	1	0	0	60.7903	250.112	ASS1
female genitalia development (GO:0030540)	1/7	0.0163368	1	0	0	60.7903	250.112	LRP2
cellular divalent inorganic anion homeostasis (GO:0072501)	1/7	0.0163368	1	0	0	60.7903	250.112	SLC34A1
heme catabolic process (GO:0042167)	1/7	0.0163368	1	0	0	60.7903	250.112	HMOX1
terpenoid metabolic process (GO:0006721)	1/7	0.0163368	1	0	0	60.7903	250.112	CYP2E1
regulation of chemokine biosynthetic process (GO:0045073)	1/7	0.0163368	1	0	0	60.7903	250.112	HMOX1
negative regulation of leukocyte migration (GO:0002686)	1/7	0.0163368	1	0	0	60.7903	250.112	HMOX1
folic acid transport (GO:0015884)	1/7	0.0163368	1	0	0	60.7903	250.112	LRP2
long-chain fatty acid import (GO:0044539)	1/7	0.0163368	1	0	0	60.7903	250.112	SLC27A2
cellular phosphate ion homeostasis (GO:0030643)	1/7	0.0163368	1	0	0	60.7903	250.112	SLC34A1
cellular trivalent inorganic anion homeostasis (GO:0072502)	1/7	0.0163368	1	0	0	60.7903	250.112	SLC34A1
porphyrin-containing compound catabolic process (GO:0006787)	1/7	0.0163368	1	0	0	60.7903	250.112	HMOX1
response to hydroperoxide (GO:0033194)	1/8	0.0186492	1	0	0	53.1915	211.806	GPX3
fatty acid alpha-oxidation (GO:0001561)	1/8	0.0186492	1	0	0	53.1915	211.806	SLC27A2
coronary vasculature morphogenesis (GO:0060977)	1/8	0.0186492	1	0	0	53.1915	211.806	LRP2
short-chain fatty acid catabolic process (GO:0019626)	1/8	0.0186492	1	0	0	53.1915	211.806	PCK1
regulation of transcription from RNA polymerase II promoter in response to oxidative stress (GO:0043619)	1/8	0.0186492	1	0	0	53.1915	211.806	HMOX1
response to magnesium ion (GO:0032026)	1/8	0.0186492	1	0	0	53.1915	211.806	FBP1
cellular monovalent inorganic anion homeostasis (GO:0030320)	1/8	0.0186492	1	0	0	53.1915	211.806	SLC34A1
benzene-containing compound metabolic process (GO:0042537)	1/8	0.0186492	1	0	0	53.1915	211.806	CYP2E1
protein tetramerization (GO:0051262)	2/90	0.0189855	1	0	0	9.45626	37.4854	GPX3;FBP1
regulation of Ras protein signal transduction (GO:0046578)	2/90	0.0189855	1	0	0	9.45626	37.4854	SQSTM1;FBP1
regulation of SNARE complex assembly (GO:0035542)	1/9	0.0209563	1	0	0	47.2813	182.757	TMEM27
inositol metabolic process (GO:0006020)	1/9	0.0209563	1	0	0	47.2813	182.757	MIOX
vacuolar proton-transporting V-type ATPase complex assembly (GO:0070072)	1/9	0.0209563	1	0	0	47.2813	182.757	ALDOB
proton-transporting V-type ATPase complex assembly (GO:0070070)	1/9	0.0209563	1	0	0	47.2813	182.757	ALDOB
positive regulation of long-term synaptic potentiation (GO:1900273)	1/9	0.0209563	1	0	0	47.2813	182.757	SQSTM1
L-ascorbic acid metabolic process (GO:0019852)	1/9	0.0209563	1	0	0	47.2813	182.757	AKR1A1
potassium ion import across plasma membrane (GO:1990573)	1/9	0.0209563	1	0	0	47.2813	182.757	FXYD2
vitamin transmembrane transport (GO:0035461)	1/9	0.0209563	1	0	0	47.2813	182.757	LRP2
positive regulation of insulin secretion involved in cellular response to glucose stimulus (GO:0035774)	1/10	0.0232581	1	0	0	42.5532	160.047	TMEM27
response to laminar fluid shear stress (GO:0034616)	1/10	0.0232581	1	0	0	42.5532	160.047	ASS1
ketone body metabolic process (GO:1902224)	1/10	0.0232581	1	0	0	42.5532	160.047	OXCT1
aspartate family amino acid metabolic process (GO:0009066)	1/10	0.0232581	1	0	0	42.5532	160.047	ASS1
leukotriene D4 biosynthetic process (GO:1901750)	1/10	0.0232581	1	0	0	42.5532	160.047	GGT1
leukotriene D4 metabolic process (GO:1901748)	1/10	0.0232581	1	0	0	42.5532	160.047	GGT1
protein processing (GO:0016485)	2/101	0.0235528	1	0	0	8.42637	31.5864	GGT1;LGMN
metal ion transport (GO:0030001)	2/101	0.0235528	1	0	0	8.42637	31.5864	LRP2;SLC5A2
phosphate ion homeostasis (GO:0055062)	1/11	0.0255545	1	0	0	38.6847	141.855	SLC34A1
regulation of blood vessel endothelial cell proliferation involved in sprouting angiogenesis (GO:1903587)	1/11	0.0255545	1	0	0	38.6847	141.855	HMOX1
arginine metabolic process (GO:0006525)	1/11	0.0255545	1	0	0	38.6847	141.855	ASS1
glutathione biosynthetic process (GO:0006750)	1/11	0.0255545	1	0	0	38.6847	141.855	GGT1
urea cycle (GO:0000050)	1/11	0.0255545	1	0	0	38.6847	141.855	ASS1
regulation of leukocyte cell-cell adhesion (GO:1903037)	1/11	0.0255545	1	0	0	38.6847	141.855	ASS1
negative regulation of leukocyte cell-cell adhesion (GO:1903038)	1/11	0.0255545	1	0	0	38.6847	141.855	ASS1
internal protein amino acid acetylation (GO:0006475)	1/11	0.0255545	1	0	0	38.6847	141.855	PCK1
monocarboxylic acid metabolic process (GO:0032787)	2/108	0.0266708	1	0	0	7.88022	28.5594	GGT1;PCK1
negative regulation of apoptotic process (GO:0043066)	4/485	0.0268151	1	0	0	3.50954	12.7003	PRDX5;MT-RNR2;SQSTM1;LGMN
nonribosomal peptide biosynthetic process (GO:0019184)	1/12	0.0278457	1	0	0	35.461	126.988	GGT1
cellular modified amino acid catabolic process (GO:0042219)	1/12	0.0278457	1	0	0	35.461	126.988	GGT1
cellular response to fluid shear stress (GO:0071498)	1/12	0.0278457	1	0	0	35.461	126.988	ASS1
prostanoid metabolic process (GO:0006692)	1/12	0.0278457	1	0	0	35.461	126.988	ACOX1
negative regulation of ATP metabolic process (GO:1903579)	1/12	0.0278457	1	0	0	35.461	126.988	FBP1
serine family amino acid biosynthetic process (GO:0009070)	1/12	0.0278457	1	0	0	35.461	126.988	GGT1
aromatic compound biosynthetic process (GO:0019438)	1/12	0.0278457	1	0	0	35.461	126.988	MT-RNR1
glutamine family amino acid biosynthetic process (GO:0009084)	1/13	0.0301317	1	0	0	32.7332	114.638	ASS1
alpha-linolenic acid metabolic process (GO:0036109)	1/13	0.0301317	1	0	0	32.7332	114.638	ACOX1
sodium ion export from cell (GO:0036376)	1/13	0.0301317	1	0	0	32.7332	114.638	FXYD2
tricarboxylic acid metabolic process (GO:0072350)	1/13	0.0301317	1	0	0	32.7332	114.638	ASS1
sodium ion export (GO:0071436)	1/13	0.0301317	1	0	0	32.7332	114.638	FXYD2
regulation of leukocyte migration (GO:0002685)	1/13	0.0301317	1	0	0	32.7332	114.638	HMOX1
phosphate ion transport (GO:0006817)	1/13	0.0301317	1	0	0	32.7332	114.638	SLC34A1
monosaccharide transport (GO:0015749)	1/14	0.0324123	1	0	0	30.3951	104.232	SLC5A2
positive regulation of neural precursor cell proliferation (GO:2000179)	1/14	0.0324123	1	0	0	30.3951	104.232	LRP2
positive regulation of blood vessel diameter (GO:0097755)	1/14	0.0324123	1	0	0	30.3951	104.232	HMOX1
positive regulation of calcium ion-dependent exocytosis (GO:0045956)	1/14	0.0324123	1	0	0	30.3951	104.232	TMEM27
sulfur compound biosynthetic process (GO:0044272)	2/122	0.0333738	1	0	0	6.97593	23.7181	AKR1A1;GGT1
sulfate transport (GO:0008272)	1/15	0.0346877	1	0	0	28.3688	95.358	SLC13A1
fatty acid beta-oxidation using acyl-CoA oxidase (GO:0033540)	1/15	0.0346877	1	0	0	28.3688	95.358	ACOX1
selective autophagy (GO:0061912)	1/15	0.0346877	1	0	0	28.3688	95.358	SQSTM1
monovalent inorganic anion homeostasis (GO:0055083)	1/15	0.0346877	1	0	0	28.3688	95.358	SLC34A1
fatty acid beta-oxidation using acyl-CoA dehydrogenase (GO:0033539)	1/15	0.0346877	1	0	0	28.3688	95.358	ACOX1
positive regulation of regulated secretory pathway (GO:1903307)	1/16	0.0369579	1	0	0	26.5957	87.7121	TMEM27
positive regulation of cell migration involved in sprouting angiogenesis (GO:0090050)	1/16	0.0369579	1	0	0	26.5957	87.7121	HMOX1
hexose transport (GO:0008645)	1/16	0.0369579	1	0	0	26.5957	87.7121	SLC5A2
cellular response to glucocorticoid stimulus (GO:0071385)	1/17	0.0392229	1	0	0	25.0313	81.0637	PCK1
purine-containing compound metabolic process (GO:0072521)	1/17	0.0392229	1	0	0	25.0313	81.0637	MT-RNR1
heterocycle biosynthetic process (GO:0018130)	1/17	0.0392229	1	0	0	25.0313	81.0637	MT-RNR1
negative regulation of cellular carbohydrate metabolic process (GO:0010677)	1/17	0.0392229	1	0	0	25.0313	81.0637	FBP1
glyceraldehyde-3-phosphate metabolic process (GO:0019682)	1/18	0.0414826	1	0	0	23.6407	75.236	ALDOB
leukotriene biosynthetic process (GO:0019370)	1/18	0.0414826	1	0	0	23.6407	75.236	GGT1
anion transmembrane transport (GO:0098656)	1/18	0.0414826	1	0	0	23.6407	75.236	SLC13A1
negative regulation of fibroblast proliferation (GO:0048147)	1/18	0.0414826	1	0	0	23.6407	75.236	FTH1
leukotriene metabolic process (GO:0006691)	1/19	0.0437372	1	0	0	22.3964	70.0909	GGT1
regulation of long-term synaptic potentiation (GO:1900271)	1/19	0.0437372	1	0	0	22.3964	70.0909	SQSTM1
regulation of gluconeogenesis (GO:0006111)	1/19	0.0437372	1	0	0	22.3964	70.0909	FBP1
triglyceride biosynthetic process (GO:0019432)	1/19	0.0437372	1	0	0	22.3964	70.0909	PCK1
sulfur compound transport (GO:0072348)	1/19	0.0437372	1	0	0	22.3964	70.0909	SLC13A1
mitochondrial electron transport, cytochrome c to oxygen (GO:0006123)	1/21	0.0482307	1	0	0	20.2634	61.4338	MT-CO1
cellular response to hexose stimulus (GO:0071331)	1/21	0.0482307	1	0	0	20.2634	61.4338	PCK1
epoxygenase P450 pathway (GO:0019373)	1/21	0.0482307	1	0	0	20.2634	61.4338	CYP2E1
glutamate metabolic process (GO:0006536)	1/21	0.0482307	1	0	0	20.2634	61.4338	GGT1
response to nicotine (GO:0035094)	1/21	0.0482307	1	0	0	20.2634	61.4338	HMOX1
glutathione derivative metabolic process (GO:1901685)	1/22	0.0504697	1	0	0	19.3424	57.7637	AKR1A1
regulation of ERBB signaling pathway (GO:1901184)	1/22	0.0504697	1	0	0	19.3424	57.7637	LGMN
purine-containing compound biosynthetic process (GO:0072522)	1/22	0.0504697	1	0	0	19.3424	57.7637	MT-RNR1
regulation of transcription from RNA polymerase III promoter (GO:0006359)	1/22	0.0504697	1	0	0	19.3424	57.7637	PRDX5
regulation of insulin secretion involved in cellular response to glucose stimulus (GO:0061178)	1/22	0.0504697	1	0	0	19.3424	57.7637	TMEM27
outflow tract septum morphogenesis (GO:0003148)	1/22	0.0504697	1	0	0	19.3424	57.7637	LRP2
glutathione derivative biosynthetic process (GO:1901687)	1/22	0.0504697	1	0	0	19.3424	57.7637	AKR1A1
exogenous drug catabolic process (GO:0042738)	1/23	0.0527035	1	0	0	18.5014	54.4509	CYP2E1
response to alkaloid (GO:0043279)	1/23	0.0527035	1	0	0	18.5014	54.4509	HMOX1
glycolytic process (GO:0006096)	1/23	0.0527035	1	0	0	18.5014	54.4509	ALDOB
cellular nitrogen compound biosynthetic process (GO:0044271)	1/23	0.0527035	1	0	0	18.5014	54.4509	MT-RNR1
glutamine family amino acid metabolic process (GO:0009064)	1/23	0.0527035	1	0	0	18.5014	54.4509	GGT1
transition metal ion homeostasis (GO:0055076)	1/24	0.0549322	1	0	0	17.7305	51.4478	HMOX1
receptor catabolic process (GO:0032801)	1/24	0.0549322	1	0	0	17.7305	51.4478	LGMN
cellular modified amino acid biosynthetic process (GO:0042398)	1/24	0.0549322	1	0	0	17.7305	51.4478	GGT1
ATP generation from ADP (GO:0006757)	1/24	0.0549322	1	0	0	17.7305	51.4478	ALDOB
drug catabolic process (GO:0042737)	1/24	0.0549322	1	0	0	17.7305	51.4478	CYP2E1
glycolytic process through glucose-6-phosphate (GO:0061620)	1/25	0.0571558	1	0	0	17.0213	48.7145	ALDOB
regulation of glucose metabolic process (GO:0010906)	1/25	0.0571558	1	0	0	17.0213	48.7145	FBP1
canonical glycolysis (GO:0061621)	1/25	0.0571558	1	0	0	17.0213	48.7145	ALDOB
long-chain fatty acid transport (GO:0015909)	1/25	0.0571558	1	0	0	17.0213	48.7145	SLC27A2
peptide catabolic process (GO:0043171)	1/25	0.0571558	1	0	0	17.0213	48.7145	GGT1
positive regulation of nitric oxide metabolic process (GO:1904407)	1/25	0.0571558	1	0	0	17.0213	48.7145	ASS1
glucose catabolic process to pyruvate (GO:0061718)	1/25	0.0571558	1	0	0	17.0213	48.7145	ALDOB
prostaglandin metabolic process (GO:0006693)	1/25	0.0571558	1	0	0	17.0213	48.7145	ACOX1
positive regulation of nitric oxide biosynthetic process (GO:0045429)	1/25	0.0571558	1	0	0	17.0213	48.7145	ASS1
bile acid biosynthetic process (GO:0006699)	1/26	0.0593743	1	0	0	16.3666	46.2176	SLC27A2
negative regulation of smooth muscle cell proliferation (GO:0048662)	1/27	0.0615876	1	0	0	15.7604	43.929	HMOX1
regulation of blood vessel diameter (GO:0097746)	1/27	0.0615876	1	0	0	15.7604	43.929	HMOX1
negative regulation of small GTPase mediated signal transduction (GO:0051058)	1/27	0.0615876	1	0	0	15.7604	43.929	FBP1
cellular response to glucose stimulus (GO:0071333)	1/27	0.0615876	1	0	0	15.7604	43.929	PCK1
regulation of vasculature development (GO:1901342)	1/28	0.0637958	1	0	0	15.1976	41.8247	HMOX1
cellular response to ketone (GO:1901655)	1/28	0.0637958	1	0	0	15.1976	41.8247	PCK1
primary neural tube formation (GO:0014020)	1/28	0.0637958	1	0	0	15.1976	41.8247	LRP2
positive regulation of sprouting angiogenesis (GO:1903672)	1/28	0.0637958	1	0	0	15.1976	41.8247	HMOX1
tube closure (GO:0060606)	1/29	0.065999	1	0	0	14.6735	39.8843	LRP2
very long-chain fatty acid metabolic process (GO:0000038)	1/29	0.065999	1	0	0	14.6735	39.8843	ACOX1
artery morphogenesis (GO:0048844)	1/30	0.0681971	1	0	0	14.1844	38.0901	LRP2
bile acid metabolic process (GO:0008206)	1/30	0.0681971	1	0	0	14.1844	38.0901	SLC27A2
regulation of sodium ion transmembrane transport (GO:1902305)	1/30	0.0681971	1	0	0	14.1844	38.0901	FXYD2
cellular response to drug (GO:0035690)	1/30	0.0681971	1	0	0	14.1844	38.0901	FBP1
positive regulation of reactive oxygen species biosynthetic process (GO:1903428)	1/30	0.0681971	1	0	0	14.1844	38.0901	ASS1
regulation of cell migration involved in sprouting angiogenesis (GO:0090049)	1/30	0.0681971	1	0	0	14.1844	38.0901	HMOX1
negative regulation of extrinsic apoptotic signaling pathway via death domain receptors (GO:1902042)	1/31	0.0703901	1	0	0	13.7268	36.4269	HMOX1
alpha-amino acid metabolic process (GO:1901605)	1/31	0.0703901	1	0	0	13.7268	36.4269	ASS1
negative regulation of cell-cell adhesion (GO:0022408)	1/31	0.0703901	1	0	0	13.7268	36.4269	ASS1
positive regulation of insulin secretion (GO:0032024)	1/31	0.0703901	1	0	0	13.7268	36.4269	TMEM27
liver development (GO:0001889)	1/31	0.0703901	1	0	0	13.7268	36.4269	PCK1
response to cadmium ion (GO:0046686)	1/31	0.0703901	1	0	0	13.7268	36.4269	SLC34A1
negative regulation of programmed cell death (GO:0043069)	3/408	0.0707576	1	0	0	3.12891	8.28691	PRDX5;MT-RNR2;SQSTM1
regulation of nitric oxide biosynthetic process (GO:0045428)	1/32	0.0725781	1	0	0	13.2979	34.8815	ASS1
negative regulation of BMP signaling pathway (GO:0030514)	1/32	0.0725781	1	0	0	13.2979	34.8815	LRP2
phosphatidylcholine biosynthetic process (GO:0006656)	1/32	0.0725781	1	0	0	13.2979	34.8815	CHPT1
neural tube closure (GO:0001843)	1/33	0.074761	1	0	0	12.8949	33.4424	LRP2
cellular glucose homeostasis (GO:0001678)	1/33	0.074761	1	0	0	12.8949	33.4424	PCK1
protein acetylation (GO:0006473)	1/33	0.074761	1	0	0	12.8949	33.4424	PCK1
positive regulation of chemokine production (GO:0032722)	1/34	0.0769389	1	0	0	12.5156	32.0994	HMOX1
macromolecule catabolic process (GO:0009057)	1/34	0.0769389	1	0	0	12.5156	32.0994	LGMN
positive regulation of cell development (GO:0010720)	1/34	0.0769389	1	0	0	12.5156	32.0994	LRP2
ventricular cardiac muscle tissue morphogenesis (GO:0055010)	1/34	0.0769389	1	0	0	12.5156	32.0994	LRP2
positive regulation of ATPase activity (GO:0032781)	1/35	0.0791118	1	0	0	12.1581	30.8437	ALDOB
carbohydrate catabolic process (GO:0016052)	1/35	0.0791118	1	0	0	12.1581	30.8437	ALDOB
flagellated sperm motility (GO:0030317)	1/35	0.0791118	1	0	0	12.1581	30.8437	SORD
carboxylic acid transmembrane transport (GO:1905039)	1/35	0.0791118	1	0	0	12.1581	30.8437	LRP2
sulfur compound catabolic process (GO:0044273)	1/35	0.0791118	1	0	0	12.1581	30.8437	GGT1
regulation of cell growth (GO:0001558)	2/201	0.0809598	1	0	0	4.23415	10.6438	CHPT1;FBP1
endosome organization (GO:0007032)	1/36	0.0812797	1	0	0	11.8203	29.6674	SQSTM1
sodium ion transmembrane transport (GO:0035725)	1/36	0.0812797	1	0	0	11.8203	29.6674	SLC13A1
zymogen activation (GO:0031638)	1/36	0.0812797	1	0	0	11.8203	29.6674	GGT1
regulation of I-kappaB kinase/NF-kappaB signaling (GO:0043122)	2/204	0.0830378	1	0	0	4.17188	10.3816	HMOX1;SQSTM1
negative regulation of Ras protein signal transduction (GO:0046580)	1/37	0.0834426	1	0	0	11.5009	28.5635	FBP1
positive regulation of smooth muscle cell proliferation (GO:0048661)	1/37	0.0834426	1	0	0	11.5009	28.5635	HMOX1
regulation of sodium ion transmembrane transporter activity (GO:2000649)	1/37	0.0834426	1	0	0	11.5009	28.5635	FXYD2
organic cyclic compound biosynthetic process (GO:1901362)	1/37	0.0834426	1	0	0	11.5009	28.5635	MT-RNR1
mitochondrion disassembly (GO:0061726)	1/38	0.0856005	1	0	0	11.1982	27.5259	SQSTM1
chemical homeostasis (GO:0048878)	1/38	0.0856005	1	0	0	11.1982	27.5259	ACOX1
regulation of extrinsic apoptotic signaling pathway via death domain receptors (GO:1902041)	1/39	0.0877534	1	0	0	10.9111	26.5491	HMOX1
positive regulation of cytokine biosynthetic process (GO:0042108)	1/40	0.0899013	1	0	0	10.6383	25.6281	HMOX1
negative regulation of catabolic process (GO:0009895)	1/40	0.0899013	1	0	0	10.6383	25.6281	FBP1
regulation of ATPase activity (GO:0043462)	1/40	0.0899013	1	0	0	10.6383	25.6281	ALDOB
autophagy of mitochondrion (GO:0000422)	1/40	0.0899013	1	0	0	10.6383	25.6281	SQSTM1
response to peptide hormone (GO:0043434)	1/40	0.0899013	1	0	0	10.6383	25.6281	PCK1
ion transmembrane transport (GO:0034220)	2/219	0.0936691	1	0	0	3.88614	9.20232	SLC13A1;FXYD2
regulation of ion transmembrane transporter activity (GO:0032412)	1/42	0.0941824	1	0	0	10.1317	23.9364	FXYD2
response to hydrogen peroxide (GO:0042542)	1/43	0.0963156	1	0	0	9.89609	23.1581	HMOX1
development of primary male sexual characteristics (GO:0046546)	1/43	0.0963156	1	0	0	9.89609	23.1581	LRP2
positive regulation of protein localization to plasma membrane (GO:1903078)	1/43	0.0963156	1	0	0	9.89609	23.1581	SQSTM1
negative regulation of ERBB signaling pathway (GO:1901185)	1/43	0.0963156	1	0	0	9.89609	23.1581	LGMN
male gonad development (GO:0008584)	1/43	0.0963156	1	0	0	9.89609	23.1581	LRP2
regulation of smooth muscle cell proliferation (GO:0048660)	1/44	0.0984438	1	0	0	9.67118	22.4204	HMOX1
unsaturated fatty acid metabolic process (GO:0033559)	1/44	0.0984438	1	0	0	9.67118	22.4204	ACOX1
amide biosynthetic process (GO:0043604)	1/44	0.0984438	1	0	0	9.67118	22.4204	ASS1
carboxylic acid biosynthetic process (GO:0046394)	1/44	0.0984438	1	0	0	9.67118	22.4204	AKR1A1
negative regulation of immune system process (GO:0002683)	1/44	0.0984438	1	0	0	9.67118	22.4204	HMOX1
positive regulation of blood vessel endothelial cell migration (GO:0043536)	1/45	0.100567	1	0	0	9.45626	21.7204	HMOX1
nicotinamide nucleotide metabolic process (GO:0046496)	1/45	0.100567	1	0	0	9.45626	21.7204	ALDOB
regulation of fibroblast proliferation (GO:0048145)	1/46	0.102686	1	0	0	9.25069	21.0554	FTH1
positive regulation of protein localization to cell periphery (GO:1904377)	1/46	0.102686	1	0	0	9.25069	21.0554	SQSTM1
icosanoid metabolic process (GO:0006690)	1/46	0.102686	1	0	0	9.25069	21.0554	GGT1
response to glucose (GO:0009749)	1/47	0.104799	1	0	0	9.05387	20.4229	PCK1
inositol phosphate metabolic process (GO:0043647)	1/47	0.104799	1	0	0	9.05387	20.4229	MIOX
polyol metabolic process (GO:0019751)	1/47	0.104799	1	0	0	9.05387	20.4229	MIOX
cellular response to heat (GO:0034605)	1/47	0.104799	1	0	0	9.05387	20.4229	HMOX1
regulation of mitochondrion organization (GO:0010821)	1/48	0.106908	1	0	0	8.86525	19.8208	SQSTM1
pattern recognition receptor signaling pathway (GO:0002221)	1/48	0.106908	1	0	0	8.86525	19.8208	LGMN
gonad development (GO:0008406)	1/49	0.109012	1	0	0	8.68432	19.2471	LRP2
lipid homeostasis (GO:0055088)	1/49	0.109012	1	0	0	8.68432	19.2471	ACOX1
organic hydroxy compound biosynthetic process (GO:1901617)	1/49	0.109012	1	0	0	8.68432	19.2471	SLC27A2
glutathione metabolic process (GO:0006749)	1/49	0.109012	1	0	0	8.68432	19.2471	GGT1
wound healing (GO:0042060)	1/50	0.111111	1	0	0	8.51064	18.6998	HMOX1
arachidonic acid metabolic process (GO:0019369)	1/51	0.113205	1	0	0	8.34376	18.1774	CYP2E1
positive regulation of nervous system development (GO:0051962)	1/52	0.115294	1	0	0	8.18331	17.6782	LRP2
regulation of calcium ion-dependent exocytosis (GO:0017158)	1/53	0.117378	1	0	0	8.0289	17.2007	TMEM27
positive regulation of response to stimulus (GO:0048584)	1/54	0.119458	1	0	0	7.88022	16.7438	TMEM27
negative regulation of cellular response to growth factor stimulus (GO:0090288)	1/55	0.121533	1	0	0	7.73694	16.3061	LRP2
regulation of BMP signaling pathway (GO:0030510)	1/56	0.123603	1	0	0	7.59878	15.8866	LRP2
anion transport (GO:0006820)	1/56	0.123603	1	0	0	7.59878	15.8866	SLC13A1
regulation of neurogenesis (GO:0050767)	1/57	0.125668	1	0	0	7.46547	15.4842	LRP2
regulation of glycolytic process (GO:0006110)	1/57	0.125668	1	0	0	7.46547	15.4842	FBP1
receptor metabolic process (GO:0043112)	1/58	0.127729	1	0	0	7.33676	15.0979	LGMN
diterpenoid metabolic process (GO:0016101)	1/62	0.135924	1	0	0	6.86342	13.6971	LRP2
cellular protein catabolic process (GO:0044257)	1/62	0.135924	1	0	0	6.86342	13.6971	LGMN
negative regulation of neuron apoptotic process (GO:0043524)	1/63	0.137961	1	0	0	6.75447	13.3792	LGMN
carbohydrate homeostasis (GO:0033500)	1/63	0.137961	1	0	0	6.75447	13.3792	PCK1
cellular response to decreased oxygen levels (GO:0036294)	1/64	0.139993	1	0	0	6.64894	13.0729	HMOX1
fatty acid catabolic process (GO:0009062)	1/65	0.14202	1	0	0	6.54664	12.7776	SLC27A2
cellular response to reactive oxygen species (GO:0034614)	1/65	0.14202	1	0	0	6.54664	12.7776	PRDX5
positive regulation of endothelial cell proliferation (GO:0001938)	1/67	0.146061	1	0	0	6.35122	12.218	HMOX1
positive regulation of synaptic transmission (GO:0050806)	1/67	0.146061	1	0	0	6.35122	12.218	SQSTM1
regulation of cardiac conduction (GO:1903779)	1/67	0.146061	1	0	0	6.35122	12.218	FXYD2
regulation of protein localization to plasma membrane (GO:1903076)	1/67	0.146061	1	0	0	6.35122	12.218	SQSTM1
monocarboxylic acid biosynthetic process (GO:0072330)	1/68	0.148075	1	0	0	6.25782	11.9527	SLC27A2
proteolysis (GO:0006508)	2/291	0.149264	1	0	0	2.92462	5.56274	GGT1;LGMN
response to organic cyclic compound (GO:0014070)	1/69	0.150084	1	0	0	6.16713	11.6963	HMOX1
positive regulation of neurogenesis (GO:0050769)	1/69	0.150084	1	0	0	6.16713	11.6963	LRP2
response to insulin (GO:0032868)	1/71	0.154087	1	0	0	5.99341	11.2091	PCK1
phosphatidylcholine metabolic process (GO:0046470)	1/71	0.154087	1	0	0	5.99341	11.2091	CHPT1
response to metal ion (GO:0010038)	1/72	0.156082	1	0	0	5.91017	10.9774	SLC34A1
glucose homeostasis (GO:0042593)	1/74	0.160059	1	0	0	5.75043	10.536	PCK1
negative regulation of phosphorylation (GO:0042326)	1/75	0.16204	1	0	0	5.67376	10.3258	FBP1
retinoid metabolic process (GO:0001523)	1/75	0.16204	1	0	0	5.67376	10.3258	LRP2
regulation of defense response (GO:0031347)	1/75	0.16204	1	0	0	5.67376	10.3258	GGT1
negative regulation of extrinsic apoptotic signaling pathway (GO:2001237)	1/76	0.164016	1	0	0	5.5991	10.122	HMOX1
negative regulation of transmembrane receptor protein serine/threonine kinase signaling pathway (GO:0090101)	1/77	0.165988	1	0	0	5.52639	9.92449	LRP2
sensory perception of mechanical stimulus (GO:0050954)	1/78	0.167956	1	0	0	5.45554	9.73297	LRP2
steroid biosynthetic process (GO:0006694)	1/79	0.169919	1	0	0	5.38648	9.54718	SLC27A2
cation transport (GO:0006812)	1/79	0.169919	1	0	0	5.38648	9.54718	LRP2
cellular response to hormone stimulus (GO:0032870)	1/80	0.171877	1	0	0	5.31915	9.36689	ABCC2
sensory perception of sound (GO:0007605)	1/81	0.173831	1	0	0	5.25348	9.19186	LRP2
regulation of anatomical structure morphogenesis (GO:0022603)	1/82	0.175781	1	0	0	5.18941	9.02189	HMOX1
negative regulation of neuron death (GO:1901215)	1/83	0.177725	1	0	0	5.12689	8.85678	LGMN
positive regulation of homeostatic process (GO:0032846)	1/83	0.177725	1	0	0	5.12689	8.85678	TMEM27
toll-like receptor signaling pathway (GO:0002224)	1/86	0.183533	1	0	0	4.94805	8.38872	LGMN
positive regulation of protein complex assembly (GO:0031334)	1/88	0.187383	1	0	0	4.83559	8.09769	TMEM27
regulation of neuron apoptotic process (GO:0043523)	1/89	0.189301	1	0	0	4.78126	7.95801	LGMN
proteolysis involved in cellular protein catabolic process (GO:0051603)	1/93	0.196929	1	0	0	4.57561	7.43497	LGMN
regulation of transcription from RNA polymerase II promoter in response to stress (GO:0043618)	1/93	0.196929	1	0	0	4.57561	7.43497	HMOX1
positive regulation of protein localization to membrane (GO:1905477)	1/95	0.200717	1	0	0	4.47928	7.19311	SQSTM1
interleukin-1-mediated signaling pathway (GO:0070498)	1/95	0.200717	1	0	0	4.47928	7.19311	SQSTM1
regulation of heart contraction (GO:0008016)	1/95	0.200717	1	0	0	4.47928	7.19311	FXYD2
epithelial cell differentiation (GO:0030855)	1/96	0.202604	1	0	0	4.43262	7.0767	PCK1
antigen processing and presentation of exogenous peptide antigen (GO:0002478)	1/97	0.204487	1	0	0	4.38693	6.96316	LGMN
antigen processing and presentation of exogenous peptide antigen via MHC class II (GO:0019886)	1/97	0.204487	1	0	0	4.38693	6.96316	LGMN
antigen processing and presentation of peptide antigen via MHC class II (GO:0002495)	1/98	0.206365	1	0	0	4.34216	6.8524	LGMN
negative regulation of cell proliferation (GO:0008285)	2/363	0.209815	1	0	0	2.34453	3.66105	FTH1;HMOX1
cellular response to metal ion (GO:0071248)	1/100	0.210109	1	0	0	4.25532	6.63884	FBP1
regulation of lipid metabolic process (GO:0019216)	1/100	0.210109	1	0	0	4.25532	6.63884	ACOX1
positive regulation of angiogenesis (GO:0045766)	1/103	0.215693	1	0	0	4.13138	6.33711	HMOX1
monovalent inorganic cation transport (GO:0015672)	1/104	0.217546	1	0	0	4.09165	6.24118	SLC5A2
positive regulation of vasculature development (GO:1904018)	1/104	0.217546	1	0	0	4.09165	6.24118	HMOX1
transmembrane transport (GO:0055085)	2/378	0.222778	1	0	0	2.25149	3.38079	ABCC2;FXYD2
regulation of response to external stimulus (GO:0032101)	1/107	0.223078	1	0	0	3.97693	5.96633	GGT1
cellular response to peptide hormone stimulus (GO:0071375)	1/110	0.228572	1	0	0	3.86847	5.70949	PCK1
macroautophagy (GO:0016236)	1/110	0.228572	1	0	0	3.86847	5.70949	SQSTM1
cellular response to insulin stimulus (GO:0032869)	1/110	0.228572	1	0	0	3.86847	5.70949	PCK1
regulation of organelle organization (GO:0033043)	1/113	0.234028	1	0	0	3.76577	5.46908	SQSTM1
negative regulation of cell growth (GO:0030308)	1/115	0.237645	1	0	0	3.70028	5.31722	FBP1
negative regulation of growth (GO:0045926)	1/120	0.246612	1	0	0	3.5461	4.96432	FBP1
negative regulation of cell migration (GO:0030336)	1/121	0.248394	1	0	0	3.51679	4.89798	HMOX1
dephosphorylation (GO:0016311)	1/124	0.253712	1	0	0	3.43171	4.70677	FBP1
vesicle organization (GO:0016050)	1/127	0.258994	1	0	0	3.35064	4.52655	SQSTM1
cellular response to hypoxia (GO:0071456)	1/132	0.267716	1	0	0	3.22373	4.24832	HMOX1
cellular response to organic substance (GO:0071310)	1/133	0.269449	1	0	0	3.19949	4.19574	ABCC2
regulation of primary metabolic process (GO:0080090)	1/139	0.279758	1	0	0	3.06138	3.89968	ACOX1
inorganic cation transmembrane transport (GO:0098662)	1/140	0.281463	1	0	0	3.03951	3.85336	SLC13A1
regulation of cellular component organization (GO:0051128)	1/140	0.281463	1	0	0	3.03951	3.85336	CHPT1
response to lipid (GO:0033993)	1/140	0.281463	1	0	0	3.03951	3.85336	PCK1
regulation of small GTPase mediated signal transduction (GO:0051056)	1/140	0.281463	1	0	0	3.03951	3.85336	SQSTM1
modification-dependent protein catabolic process (GO:0019941)	1/141	0.283163	1	0	0	3.01796	3.80785	SQSTM1
cellular response to interleukin-1 (GO:0071347)	1/150	0.298291	1	0	0	2.83688	3.43173	SQSTM1
regulation of apoptotic process (GO:0042981)	3/815	0.299835	1	0	0	1.56638	1.88674	PRDX5;MT-RNR2;SQSTM1
spermatogenesis (GO:0007283)	1/153	0.303264	1	0	0	2.78125	3.31846	GGT1
male gamete generation (GO:0048232)	1/154	0.304914	1	0	0	2.76319	3.28192	GGT1
neutrophil degranulation (GO:0043312)	2/479	0.310938	1	0	0	1.77675	2.07553	FTH1;SLC27A2
positive regulation of cellular biosynthetic process (GO:0031328)	1/159	0.313107	1	0	0	2.6763	3.10775	ASS1
neutrophil activation involved in immune response (GO:0002283)	2/483	0.314419	1	0	0	1.76204	2.03873	FTH1;SLC27A2
cellular protein metabolic process (GO:0044267)	2/484	0.315289	1	0	0	1.7584	2.02966	SLC34A1;LGMN
neutrophil mediated immunity (GO:0002446)	2/487	0.317897	1	0	0	1.74756	2.00276	FTH1;SLC27A2
positive regulation of I-kappaB kinase/NF-kappaB signaling (GO:0043123)	1/163	0.319593	1	0	0	2.61063	2.97796	HMOX1
neuron projection morphogenesis (GO:0048812)	1/163	0.319593	1	0	0	2.61063	2.97796	LRP2
glycerophospholipid biosynthetic process (GO:0046474)	1/164	0.321205	1	0	0	2.59471	2.94675	CHPT1
regulation of inflammatory response (GO:0050727)	1/166	0.324418	1	0	0	2.56345	2.88573	GGT1
positive regulation of protein kinase activity (GO:0045860)	1/172	0.333968	1	0	0	2.47402	2.71329	MT-RNR1
positive regulation of hydrolase activity (GO:0051345)	1/172	0.333968	1	0	0	2.47402	2.71329	ALDOB
peptide biosynthetic process (GO:0043043)	1/174	0.337121	1	0	0	2.44559	2.65912	GGT1
regulation of angiogenesis (GO:0045765)	1/177	0.341825	1	0	0	2.40414	2.58074	HMOX1
negative regulation of cellular process (GO:0048523)	2/534	0.358439	1	0	0	1.59375	1.63519	FTH1;FBP1
receptor-mediated endocytosis (GO:0006898)	1/188	0.358793	1	0	0	2.26347	2.32008	LRP2
protein oligomerization (GO:0051259)	1/217	0.4015	1	0	0	1.96098	1.78948	HMOX1
endosomal transport (GO:0016197)	1/229	0.418347	1	0	0	1.85822	1.61933	SQSTM1
activation of protein kinase activity (GO:0032147)	1/233	0.423858	1	0	0	1.82632	1.56763	MT-RNR1
cytokine-mediated signaling pathway (GO:0019221)	2/633	0.440813	1	0	0	1.34449	1.10132	HMOX1;SQSTM1
inflammatory response (GO:0006954)	1/252	0.449348	1	0	0	1.68862	1.35082	PRDX5
positive regulation of programmed cell death (GO:0043068)	1/257	0.45587	1	0	0	1.65577	1.30068	SQSTM1
endocytosis (GO:0006897)	1/263	0.463597	1	0	0	1.61799	1.24381	LRP2
cellular response to oxygen-containing compound (GO:1901701)	1/274	0.477485	1	0	0	1.55304	1.14804	PRDX5
negative regulation of signal transduction (GO:0009968)	1/283	0.488586	1	0	0	1.50365	1.07697	LGMN
ion transport (GO:0006811)	1/289	0.495858	1	0	0	1.47243	1.03286	FXYD2
positive regulation of apoptotic process (GO:0043065)	1/307	0.517072	1	0	0	1.3861	0.914234	SQSTM1
ubiquitin-dependent protein catabolic process (GO:0006511)	1/341	0.554785	1	0	0	1.24789	0.735228	SQSTM1
negative regulation of transcription, DNA-templated (GO:0045892)	2/813	0.57488	1	0	0	1.04682	0.579513	PRDX5;FBP1
vesicle-mediated transport (GO:0016192)	1/410	0.622673	1	0	0	1.03788	0.49168	LRP2
regulation of intracellular signal transduction (GO:1902531)	1/422	0.633397	1	0	0	1.00837	0.460479	SQSTM1
positive regulation of cell proliferation (GO:0008284)	1/424	0.635155	1	0	0	1.00361	0.455525	HMOX1
cellular response to cytokine stimulus (GO:0071345)	1/456	0.662188	1	0	0	0.933184	0.384664	HMOX1
positive regulation of intracellular signal transduction (GO:1902533)	1/479	0.680397	1	0	0	0.888376	0.342095	HMOX1
negative regulation of transcription from RNA polymerase II promoter (GO:0000122)	1/565	0.740354	1	0	0	0.753154	0.226418	FBP1
regulation of cell proliferation (GO:0042127)	1/740	0.830357	1	0	0	0.575043	0.1069	FTH1
positive regulation of transcription from RNA polymerase II promoter (GO:0045944)	1/848	0.869798	1	0	0	0.501807	0.0699992	SQSTM1
regulation of transcription from RNA polymerase II promoter (GO:0006357)	2/1478	0.871578	1	0	0	0.575821	0.0791464	SQSTM1;FBP1
positive regulation of transcription, DNA-templated (GO:0045893)	1/1120	0.93358	1	0	0	0.379939	0.0261127	SQSTM1

## Sheet: DA-PT (IRI) vs Nephron (IRI)
Term	Overlap	P-value	Adjusted P-value	Old P-value	Old Adjusted P-value	Odds Ratio	Combined Score	Genes
cellular protein metabolic process (GO:0044267)	9/484	2.74165e-06	0.0139906	0	0	7.43802	95.2583	C3;LGALS1;RPS19;CPE;PLAT;IGFBP7;B2M;CP;CYR61
positive regulation of granulocyte chemotaxis (GO:0071624)	3/26	3.6705e-05	0.026758	0	0	46.1538	471.351	CD74;CXCL1;CXCL2
positive regulation of neutrophil migration (GO:1902624)	3/25	3.2527e-05	0.0276642	0	0	48	496.005	CD74;CXCL1;CXCL2
regulation of neutrophil chemotaxis (GO:0090022)	3/29	5.13131e-05	0.0327313	0	0	41.3793	408.727	CD74;CXCL1;CXCL2
regulation of DNA damage response, signal transduction by p53 class mediator (GO:0043516)	3/25	3.2527e-05	0.0331971	0	0	48	496.005	CD74;ANKRD1;CD44
positive regulation of neutrophil chemotaxis (GO:0090023)	3/24	2.86742e-05	0.0365811	0	0	50	522.976	CD74;CXCL1;CXCL2
cytokine-mediated signaling pathway (GO:0019221)	9/633	2.36339e-05	0.0402012	0	0	5.6872	60.5848	NFKBIA;VCAM1;ANXA2;CCL2;CXCL1;VIM;CXCL2;B2M;CD44
cell-matrix adhesion (GO:0007160)	4/90	7.53748e-05	0.0427375	0	0	17.7778	168.765	VCAM1;ACTN1;ITGA1;CD44
positive regulation of receptor binding (GO:1900122)	2/6	9.12893e-05	0.0465849	0	0	133.333	1240.2	ANXA2;B2M
cellular response to interferon-gamma (GO:0071346)	4/116	0.000201377	0.0540857	0	0	13.7931	117.384	VCAM1;CCL2;B2M;CD44
positive regulation of apoptotic cell clearance (GO:2000427)	2/7	0.000127601	0.0542623	0	0	114.286	1024.75	C3;CCL2
neutrophil mediated immunity (GO:0002446)	7/487	0.000196239	0.0556338	0	0	5.74949	49.0786	C3;CSTB;ANXA2;CXCL1;CYBA;B2M;CD44
extracellular matrix organization (GO:0030198)	6/229	2.20133e-05	0.0561669	0	0	10.4803	112.39	ADAMTS5;SPARC;VCAM1;COL4A1;ITGA1;CD44
negative regulation of apoptotic process (GO:0043066)	7/485	0.000191356	0.0574406	0	0	5.7732	49.4265	NFKBIA;CD74;GPX1;CITED2;HSPB1;CCL2;CD44
positive regulation of phagocytosis (GO:0050766)	3/39	0.000126101	0.0584993	0	0	30.7692	276.259	C3;CCL2;CYBA
neutrophil activation involved in immune response (GO:0002283)	7/483	0.000186572	0.0595048	0	0	5.7971	49.7779	C3;CSTB;ANXA2;CXCL1;CYBA;B2M;CD44
positive regulation of chemotaxis (GO:0050921)	3/48	0.000234905	0.059936	0	0	25	208.908	HSPB1;CXCL1;CXCL2
neutrophil degranulation (GO:0043312)	7/479	0.000177294	0.0603156	0	0	5.84551	50.4918	C3;CSTB;ANXA2;CXCL1;CYBA;B2M;CD44
regulation of apoptotic cell clearance (GO:2000425)	2/8	0.000169863	0.0619151	0	0	100	868.052	C3;CCL2
positive regulation of viral entry into host cell (GO:0046598)	2/8	0.000169863	0.0666778	0	0	100	868.052	CD74;LGALS1
chemokine-mediated signaling pathway (GO:0070098)	3/52	0.000298048	0.0724257	0	0	23.0769	187.344	CCL2;CXCL1;CXCL2
negative regulation of intrinsic apoptotic signaling pathway in response to DNA damage by p53 class mediator (GO:1902166)	2/11	0.000332064	0.0770237	0	0	72.7273	582.559	CD74;CD44
cellular response to growth factor stimulus (GO:0071363)	4/139	0.000401525	0.0788071	0	0	11.5108	90.0171	ANKRD1;HSPB1;CCL2;CD44
negative regulation of DNA damage response, signal transduction by p53 class mediator (GO:0043518)	2/12	0.000397841	0.0812072	0	0	66.6667	521.964	CD74;CD44
muscle contraction (GO:0006936)	4/137	0.000380058	0.0843232	0	0	11.6788	91.973	CALD1;TPM1;ITGA1;VIM
regulation of intrinsic apoptotic signaling pathway in response to DNA damage by p53 class mediator (GO:1902165)	2/12	0.000397841	0.0845908	0	0	66.6667	521.964	CD74;CD44
epiboly involved in wound healing (GO:0090505)	2/14	0.000546788	0.0996521	0	0	57.1429	429.226	CYR61;CD44
negative regulation of intrinsic apoptotic signaling pathway by p53 class mediator (GO:1902254)	2/14	0.000546788	0.103343	0	0	57.1429	429.226	CD74;CD44
response to lipopolysaccharide (GO:0032496)	4/155	0.000605645	0.106573	0	0	10.3226	76.4822	ANKRD1;CCL2;CXCL1;CXCL2
negative regulation of signal transduction by p53 class mediator (GO:1901797)	2/15	0.000629902	0.107146	0	0	53.3333	393.064	CD74;CD44
interferon-gamma-mediated signaling pathway (GO:0060333)	3/70	0.000715274	0.117743	0	0	17.1429	124.163	VCAM1;B2M;CD44
regulation of apoptotic process (GO:0042981)	8/815	0.000863827	0.137753	0	0	3.92638	27.6972	NFKBIA;CD74;LGALS1;CITED2;ACTN1;ANKRD1;HSPB1;CD44
cellular response to cytokine stimulus (GO:0071345)	6/456	0.000923899	0.142868	0	0	5.26316	36.7732	VCAM1;ANKRD1;CCL2;CXCL1;VIM;CXCL2
protein heterotetramerization (GO:0051290)	2/19	0.00101931	0.152986	0	0	42.1053	290.048	CD74;ANXA2
negative regulation of binding (GO:0051100)	3/82	0.00113309	0.156275	0	0	14.6341	99.2606	NFKBIA;ID3;NES
wound healing, spreading of cells (GO:0044319)	2/20	0.00113076	0.160285	0	0	40	271.395	CYR61;CD44
hydrogen peroxide metabolic process (GO:0042743)	2/20	0.00113076	0.164865	0	0	40	271.395	GPX1;CYBA
positive regulation of leukocyte cell-cell adhesion (GO:1903039)	2/21	0.00124779	0.167565	0	0	38.0952	254.719	CCL2;CD44
protein tetramerization (GO:0051262)	3/90	0.00148219	0.193938	0	0	13.3333	86.8565	CD74;RPS19;ANXA2
negative regulation of intrinsic apoptotic signaling pathway in response to DNA damage (GO:1902230)	2/24	0.00163212	0.208218	0	0	33.3333	213.929	CD74;CD44
regulation of I-kappaB kinase/NF-kappaB signaling (GO:0043122)	4/204	0.00167716	0.208746	0	0	7.84314	50.1227	NFKBIA;CD74;LGALS1;HSPB1
post-translational protein modification (GO:0043687)	5/357	0.00193202	0.229281	0	0	5.60224	35.0095	C3;LGALS1;IGFBP7;CP;CYR61
regulation of viral entry into host cell (GO:0046596)	2/26	0.00191577	0.232765	0	0	30.7692	192.543	CD74;LGALS1
negative regulation of cellular process (GO:0048523)	6/534	0.00206659	0.239677	0	0	4.49438	27.7836	ADAMTS1;ACTN1;ITGA1;CXCL1;IGFBP7;CYR61
positive regulation of fibroblast proliferation (GO:0048146)	2/28	0.00222109	0.241153	0	0	28.5714	174.565	CD74;S100A6
regulation of cell morphogenesis (GO:0022604)	2/28	0.00222109	0.246396	0	0	28.5714	174.565	SPARC;CD44
negative regulation of response to DNA damage stimulus (GO:2001021)	2/28	0.00222109	0.251871	0	0	28.5714	174.565	CD74;CD44
regulation of leukocyte chemotaxis (GO:0002688)	2/30	0.00254788	0.270871	0	0	26.6667	159.267	CXCL1;CXCL2
sarcomere organization (GO:0045214)	2/31	0.00271926	0.283191	0	0	25.8065	152.449	TPM1;ANKRD1
cellular response to oxidative stress (GO:0034599)	3/115	0.00298173	0.304316	0	0	10.4348	60.6809	GPX1;TPM1;CYBA
positive regulation of cell-cell adhesion (GO:0022409)	2/33	0.00307785	0.307966	0	0	24.2424	140.207	CITED2;CD44
negative regulation of DNA binding (GO:0043392)	2/34	0.00326501	0.308543	0	0	23.5294	134.694	NFKBIA;ID3
cellular protein modification process (GO:0006464)	8/1001	0.00316346	0.310445	0	0	3.1968	18.4011	C3;LGALS1;CCL2;CPE;PLAT;IGFBP7;CP;CYR61
regulation of ERK1 and ERK2 cascade (GO:0070372)	4/247	0.00334963	0.310785	0	0	6.47773	36.916	CD74;CCL2;CYR61;CD44
negative regulation of programmed cell death (GO:0043069)	5/408	0.00343706	0.313202	0	0	4.90196	27.8095	NFKBIA;CD74;CITED2;HSPB1;CD44
positive regulation of leukocyte migration (GO:0002687)	2/34	0.00326501	0.314365	0	0	23.5294	134.694	CXCL1;CXCL2
cardiac muscle tissue morphogenesis (GO:0055008)	2/36	0.00365493	0.32157	0	0	22.2222	124.704	TPM1;ANKRD1
inflammatory response (GO:0006954)	4/252	0.00359801	0.322117	0	0	6.34921	35.7294	CCL2;CXCL1;CYBA;CXCL2
regulation of protein phosphorylation (GO:0001932)	4/261	0.00407621	0.335499	0	0	6.13027	33.7323	C3;CD74;HSPB1;CYR61
retina homeostasis (GO:0001895)	2/38	0.00406547	0.3401	0	0	21.0526	115.9	HSPB1;B2M
actin-myosin filament sliding (GO:0033275)	2/38	0.00406547	0.345768	0	0	21.0526	115.9	TPM1;VIM
muscle filament sliding (GO:0030049)	2/38	0.00406547	0.351628	0	0	21.0526	115.9	TPM1;VIM
monocyte chemotaxis (GO:0002548)	2/41	0.0047195	0.370517	0	0	19.5122	104.508	RPS19;CCL2
positive regulation of receptor-mediated endocytosis (GO:0048260)	2/41	0.0047195	0.376306	0	0	19.5122	104.508	ANXA2;B2M
negative regulation of proteolysis (GO:0045861)	2/41	0.0047195	0.382279	0	0	19.5122	104.508	CSTB;PLAT
cardiac ventricle morphogenesis (GO:0003208)	2/43	0.00518069	0.400562	0	0	18.6047	97.9129	TPM1;CPE
positive regulation of viral life cycle (GO:1903902)	2/44	0.00541877	0.400753	0	0	18.1818	94.8707	CD74;LGALS1
heart contraction (GO:0060047)	2/44	0.00541877	0.406647	0	0	18.1818	94.8707	GPX1;TPM1
positive regulation of transport (GO:0051050)	2/44	0.00541877	0.412716	0	0	18.1818	94.8707	C3;ANXA2
regulation of cellular component movement (GO:0051270)	2/46	0.00590974	0.424752	0	0	17.3913	89.2374	RPS19;ACTN1
myofibril assembly (GO:0030239)	2/47	0.00616259	0.430791	0	0	17.0213	86.6257	TPM1;ANKRD1
regulation of fibroblast proliferation (GO:0048145)	2/46	0.00590974	0.43082	0	0	17.3913	89.2374	CD74;S100A6
cellular response to interleukin-1 (GO:0071347)	3/150	0.00626317	0.431905	0	0	8	40.5845	NFKBIA;ANKRD1;CCL2
positive regulation of tumor necrosis factor production (GO:0032760)	2/47	0.00616259	0.436774	0	0	17.0213	86.6257	HSPB1;CYBA
protein heterooligomerization (GO:0051291)	2/49	0.0066829	0.454704	0	0	16.3265	81.7666	CD74;ANXA2
regulation of DNA binding (GO:0051101)	2/52	0.00749948	0.503551	0	0	15.3846	75.2757	NFKBIA;ID3
positive regulation of protein modification process (GO:0031401)	3/163	0.00786954	0.521536	0	0	7.36196	35.6669	C3;CD74;CYR61
response to reactive oxygen species (GO:0000302)	2/60	0.00988432	0.646663	0	0	13.3333	61.5574	GPX1;TPM1
positive regulation of leukocyte chemotaxis (GO:0002690)	2/61	0.0102032	0.659074	0	0	13.1148	60.1319	CXCL1;CXCL2
regulation of proteolysis (GO:0030162)	2/63	0.0108545	0.683834	0	0	12.6984	57.4371	CSTB;PLAT
positive regulation of cell adhesion (GO:0045785)	2/64	0.0111869	0.687792	0	0	12.5	56.1626	CITED2;TPM1
iron ion homeostasis (GO:0055072)	2/63	0.0108545	0.692382	0	0	12.6984	57.4371	B2M;CP
positive regulation of endocytosis (GO:0045807)	2/64	0.0111869	0.69618	0	0	12.5	56.1626	CYBA;B2M
positive regulation of phosphorylation (GO:0042327)	3/208	0.0151834	0.704372	0	0	5.76923	24.159	C3;CD74;CYR61
positive regulation of myeloid leukocyte cytokine production involved in immune response (GO:0061081)	1/6	0.0149083	0.704416	0	0	66.6667	280.389	CD74
antigen processing and presentation of exogenous peptide antigen via MHC class I, TAP-dependent (GO:0002479)	2/75	0.0151327	0.708462	0	0	10.6667	44.7029	CYBA;B2M
amine metabolic process (GO:0009308)	1/6	0.0149083	0.711	0	0	66.6667	280.389	VCAM1
response to interleukin-1 (GO:0070555)	2/76	0.0155172	0.71337	0	0	10.5263	43.8506	ANKRD1;CCL2
regulation of immune response (GO:0050776)	3/251	0.0248297	0.715852	0	0	4.78088	17.6688	C3;VCAM1;B2M
response to molecule of bacterial origin (GO:0002237)	2/98	0.0249949	0.716567	0	0	8.16327	30.115	CXCL1;CXCL2
UV protection (GO:0009650)	1/10	0.0247259	0.716912	0	0	40	147.996	GPX1
spleen development (GO:0048536)	1/8	0.0198292	0.717647	0	0	50	196.03	CITED2
regulation of male gonad development (GO:2000018)	1/6	0.0149083	0.717707	0	0	66.6667	280.389	CITED2
muscle cell migration (GO:0014812)	1/10	0.0247259	0.721009	0	0	40	147.996	PLAT
B cell mediated immunity (GO:0019724)	1/8	0.0198292	0.722773	0	0	50	196.03	CD74
positive regulation of nitric-oxide synthase biosynthetic process (GO:0051770)	1/9	0.0222806	0.724189	0	0	44.4444	169.068	CCL2
antigen processing and presentation of endogenous peptide antigen (GO:0002483)	1/6	0.0149083	0.724543	0	0	66.6667	280.389	B2M
sequestering of actin monomers (GO:0042989)	1/10	0.0247259	0.725152	0	0	40	147.996	TMSB10
left/right pattern formation (GO:0060972)	1/7	0.0173717	0.726623	0	0	57.1429	231.595	CITED2
regulation of receptor binding (GO:1900120)	1/8	0.0198292	0.727973	0	0	50	196.03	B2M
regulation of leukocyte activation (GO:0002694)	1/9	0.0222806	0.728831	0	0	44.4444	169.068	CD74
negative regulation of transcription from RNA polymerase II promoter in response to stress (GO:0097201)	1/10	0.0247259	0.729344	0	0	40	147.996	CITED2
viral process (GO:0016032)	3/220	0.0176101	0.730604	0	0	5.45455	22.0325	RPS19;CCL2;B2M
cellular response to iron ion (GO:0071281)	1/6	0.0149083	0.731509	0	0	66.6667	280.389	B2M
regulation of cysteine-type endopeptidase activity involved in apoptotic process (GO:0043281)	2/93	0.022675	0.732345	0	0	8.60215	32.572	GPX1;CD44
regulation of natural killer cell chemotaxis (GO:2000501)	1/7	0.0173717	0.732628	0	0	57.1429	231.595	CCL2
positive regulation of respiratory burst (GO:0060267)	1/8	0.0198292	0.733248	0	0	50	196.03	RPS19
regulation of muscle system process (GO:0090257)	1/9	0.0222806	0.733534	0	0	44.4444	169.068	TPM1
positive regulation of receptor recycling (GO:0001921)	1/10	0.0247259	0.733584	0	0	40	147.996	ANXA2
extracellular matrix disassembly (GO:0022617)	2/78	0.0162986	0.736031	0	0	10.2564	42.2223	ADAMTS5;CD44
positive regulation of transmembrane receptor protein serine/threonine kinase signaling pathway (GO:0090100)	2/82	0.0179109	0.73709	0	0	9.7561	39.2424	CITED2;CYR61
macrophage migration (GO:1905517)	1/10	0.0247259	0.737874	0	0	40	147.996	CCL2
negative regulation of serine-type peptidase activity (GO:1902572)	1/9	0.0222806	0.738297	0	0	44.4444	169.068	SPINK1
positive regulation of tumor necrosis factor biosynthetic process (GO:0042535)	1/8	0.0198292	0.7386	0	0	50	196.03	HSPB1
regulation of glial cell apoptotic process (GO:0034350)	1/6	0.0149083	0.738611	0	0	66.6667	280.389	CCL2
leukocyte aggregation (GO:0070486)	1/7	0.0173717	0.738733	0	0	57.1429	231.595	CD44
negative regulation of cell proliferation (GO:0008285)	4/363	0.0127529	0.739526	0	0	4.40771	19.2264	ADAMTS1;ITGA1;CXCL1;IGFBP7
cellular response to tumor necrosis factor (GO:0071356)	3/194	0.0126089	0.739576	0	0	6.18557	27.0517	NFKBIA;ANKRD1;CCL2
negative regulation of protein binding (GO:0032091)	2/67	0.0122108	0.741805	0	0	11.9403	52.6022	B2M;NES
positive regulation of vacuole organization (GO:0044090)	1/10	0.0247259	0.742215	0	0	40	147.996	ANXA2
cellular response to fibroblast growth factor stimulus (GO:0044344)	2/94	0.0231314	0.742388	0	0	8.51064	32.0559	CCL2;CD44
antigen processing and presentation of exogenous peptide antigen via MHC class I (GO:0042590)	2/78	0.0162986	0.742603	0	0	10.2564	42.2223	CYBA;B2M
antigen processing and presentation of exogenous peptide antigen via MHC class I, TAP-independent (GO:0002480)	1/9	0.0222806	0.743122	0	0	44.4444	169.068	B2M
actin filament network formation (GO:0051639)	1/8	0.0198292	0.744031	0	0	50	196.03	ACTN1
cytoplasmic sequestering of NF-kappaB (GO:0007253)	1/7	0.0173717	0.744941	0	0	57.1429	231.595	NFKBIA
negative regulation of cysteine-type endopeptidase activity involved in apoptotic process (GO:0043154)	2/68	0.0125609	0.745328	0	0	11.7647	51.4961	GPX1;CD44
cellular response to cold (GO:0070417)	1/6	0.0149083	0.745853	0	0	66.6667	280.389	NFKBIA
regulation of mammary gland epithelial cell proliferation (GO:0033599)	1/10	0.0247259	0.746607	0	0	40	147.996	GPX1
regulation of organ morphogenesis (GO:2000027)	1/9	0.0222806	0.748011	0	0	44.4444	169.068	CITED2
negative regulation of receptor binding (GO:1900121)	1/11	0.0271653	0.749323	0	0	36.3636	131.12	B2M
regulation of peroxisome proliferator activated receptor signaling pathway (GO:0035358)	1/8	0.0198292	0.749542	0	0	50	196.03	CITED2
negative regulation of cellular protein metabolic process (GO:0032269)	2/89	0.0208877	0.750632	0	0	8.98876	34.7739	CSTB;PLAT
macrophage chemotaxis (GO:0048246)	1/10	0.0247259	0.751051	0	0	40	147.996	CCL2
positive regulation of cell migration by vascular endothelial growth factor signaling pathway (GO:0038089)	1/7	0.0173717	0.751254	0	0	57.1429	231.595	HSPB1
vascular endothelial growth factor receptor signaling pathway (GO:0048010)	2/70	0.0132742	0.752647	0	0	11.4286	49.3935	HSPB1;CYBA
regulation of macrophage cytokine production (GO:0010935)	1/9	0.0222806	0.752965	0	0	44.4444	169.068	CD74
membrane raft assembly (GO:0001765)	1/6	0.0149083	0.753237	0	0	66.6667	280.389	ANXA2
heart process (GO:0003015)	1/11	0.0271653	0.753395	0	0	36.3636	131.12	GPX1
positive regulation of T cell activation (GO:0050870)	2/68	0.0125609	0.754097	0	0	11.7647	51.4961	VCAM1;CCL2
basement membrane organization (GO:0071711)	1/8	0.0198292	0.755136	0	0	50	196.03	COL4A1
superoxide anion generation (GO:0042554)	1/10	0.0247259	0.755548	0	0	40	147.996	CYBA
positive regulation of response to external stimulus (GO:0032103)	2/90	0.0213287	0.755836	0	0	8.88889	34.2018	NFKBIA;CYBA
positive regulation of lymphocyte proliferation (GO:0050671)	2/71	0.0136374	0.756428	0	0	11.2676	48.3937	CD74;VCAM1
regulation of lamellipodium morphogenesis (GO:2000392)	1/11	0.0271653	0.757512	0	0	36.3636	131.12	CD44
regulation of low-density lipoprotein particle clearance (GO:0010988)	1/7	0.0173717	0.757675	0	0	57.1429	231.595	ANXA2
response to muscle stretch (GO:0035994)	1/9	0.0222806	0.757985	0	0	44.4444	169.068	ANKRD1
cellular response to molecule of bacterial origin (GO:0071219)	2/84	0.0187414	0.759028	0	0	9.52381	37.8764	ANKRD1;CCL2
cytochrome complex assembly (GO:0017004)	1/10	0.0247259	0.760099	0	0	40	147.996	CYBA
negative regulation of cysteine-type endopeptidase activity (GO:2000117)	2/72	0.0140048	0.760282	0	0	11.1111	47.4262	GPX1;CD44
positive regulation of cell proliferation (GO:0008284)	4/424	0.0213072	0.760353	0	0	3.77358	14.5234	CD74;S100A6;NES;CYR61
positive regulation of ERK1 and ERK2 cascade (GO:0070374)	3/201	0.0138618	0.760611	0	0	5.97015	25.544	CD74;CCL2;CD44
positive regulation of osteoblast proliferation (GO:0033690)	1/6	0.0149083	0.76077	0	0	66.6667	280.389	CYR61
immunoglobulin mediated immune response (GO:0016064)	1/8	0.0198292	0.760814	0	0	50	196.03	CD74
cellular response to lipopolysaccharide (GO:0071222)	2/91	0.0217736	0.761032	0	0	8.79121	33.6445	ANKRD1;CCL2
positive regulation of endothelial cell migration (GO:0010595)	2/70	0.0132742	0.761104	0	0	11.4286	49.3935	SPARC;HSPB1
negative regulation of peptide secretion (GO:0002792)	1/11	0.0271653	0.761674	0	0	36.3636	131.12	CD74
negative regulation of lipid localization (GO:1905953)	1/9	0.0222806	0.763072	0	0	44.4444	169.068	NFKBIA
bone cell development (GO:0098751)	1/7	0.0173717	0.764207	0	0	57.1429	231.595	ANXA2
positive regulation of calcium ion import (GO:0090280)	1/10	0.0247259	0.764706	0	0	40	147.996	CCL2
actomyosin structure organization (GO:0031032)	2/71	0.0136374	0.764741	0	0	11.2676	48.3937	TPM1;ANKRD1
protein modification process (GO:0036211)	2/84	0.0187414	0.765101	0	0	9.52381	37.8764	CPE;PLAT
peptide metabolic process (GO:0006518)	2/104	0.027901	0.765478	0	0	7.69231	27.5315	GPX1;CPE
regulation of tumor necrosis factor biosynthetic process (GO:0042534)	1/11	0.0271653	0.765883	0	0	36.3636	131.12	HSPB1
positive regulation of cellular protein metabolic process (GO:0032270)	2/91	0.0217736	0.766281	0	0	8.79121	33.6445	NFKBIA;VIM
regulation of toll-like receptor 2 signaling pathway (GO:0034135)	1/8	0.0198292	0.766577	0	0	50	196.03	CYBA
negative regulation of serine-type endopeptidase activity (GO:1900004)	1/9	0.0222806	0.768228	0	0	44.4444	169.068	SPINK1
embryonic camera-type eye development (GO:0031076)	1/6	0.0149083	0.768454	0	0	66.6667	280.389	NES
positive regulation of lipid localization (GO:1905954)	1/10	0.0247259	0.769369	0	0	40	147.996	C3
regulation of peptidyl-tyrosine phosphorylation (GO:0050730)	2/85	0.0191628	0.769981	0	0	9.41176	37.2215	CD74;CD44
positive regulation of heterotypic cell-cell adhesion (GO:0034116)	1/11	0.0271653	0.770138	0	0	36.3636	131.12	CD44
negative regulation of glial cell apoptotic process (GO:0034351)	1/7	0.0173717	0.770852	0	0	57.1429	231.595	CCL2
positive regulation of cellular metabolic process (GO:0031325)	2/92	0.0222224	0.771434	0	0	8.69565	33.1013	NFKBIA;ANXA2
positive regulation of inflammatory response (GO:0050729)	2/73	0.0143765	0.772247	0	0	10.9589	46.4894	NFKBIA;RPS19
insulin metabolic process (GO:1901142)	1/8	0.0198292	0.772429	0	0	50	196.03	CPE
positive regulation of protein phosphorylation (GO:0001934)	4/412	0.0194041	0.773586	0	0	3.8835	15.3098	C3;CD74;CYR61;CD44
negative regulation of cellular protein catabolic process (GO:1903363)	1/10	0.0247259	0.774089	0	0	40	147.996	ANXA2
regulation of serine-type endopeptidase activity (GO:1900003)	1/11	0.0271653	0.77444	0	0	36.3636	131.12	SPINK1
positive regulation of T cell cytokine production (GO:0002726)	1/12	0.0295988	0.774577	0	0	33.3333	117.334	B2M
positive regulation of vesicle fusion (GO:0031340)	1/6	0.0149083	0.776296	0	0	66.6667	280.389	ANXA2
response to tumor necrosis factor (GO:0034612)	2/97	0.0245234	0.777285	0	0	8.24742	30.5825	ANKRD1;CCL2
smooth muscle cell migration (GO:0014909)	1/7	0.0173717	0.777614	0	0	57.1429	231.595	PLAT
regulation of vascular associated smooth muscle cell migration (GO:1904752)	1/8	0.0198292	0.778371	0	0	50	196.03	TPM1
positive regulation of signal transduction (GO:0009967)	3/206	0.0147988	0.778538	0	0	5.82524	24.543	C3;CD74;CITED2
plasminogen activation (GO:0031639)	1/12	0.0295988	0.778569	0	0	33.3333	117.334	PLAT
membrane raft organization (GO:0031579)	1/10	0.0247259	0.778867	0	0	40	147.996	ANXA2
negative regulation of cell motility (GO:2000146)	2/97	0.0245234	0.782143	0	0	8.24742	30.5825	CITED2;TPM1
negative regulation of vascular smooth muscle cell proliferation (GO:1904706)	1/12	0.0295988	0.782604	0	0	33.3333	117.334	TPM1
leukocyte adhesion to vascular endothelial cell (GO:0061756)	1/16	0.0392729	0.78285	0	0	25	80.9305	VCAM1
positive regulation of defense response (GO:0031349)	2/74	0.0147525	0.784189	0	0	10.8108	45.5821	NFKBIA;CYBA
positive regulation of monocyte differentiation (GO:0045657)	1/8	0.0198292	0.784405	0	0	50	196.03	CD74
regulation of acrosome reaction (GO:0060046)	1/16	0.0392729	0.78592	0	0	25	80.9305	SPINK1
vesicle budding from membrane (GO:0006900)	1/12	0.0295988	0.78668	0	0	33.3333	117.334	ANXA2
cytoskeleton organization (GO:0007010)	2/126	0.0396296	0.786886	0	0	6.34921	20.4964	TPM1;CCL2
positive regulation of cytokine production involved in immune response (GO:0002720)	1/15	0.0368633	0.787085	0	0	26.6667	88.0144	B2M
regulation of reactive oxygen species biosynthetic process (GO:1903426)	1/16	0.0392729	0.789015	0	0	25	80.9305	CYBA
lipoxygenase pathway (GO:0019372)	1/15	0.0368633	0.790392	0	0	26.6667	88.0144	GPX1
positive regulation of interleukin-1 production (GO:0032732)	1/12	0.0295988	0.790798	0	0	33.3333	117.334	HSPB1
cytoplasmic sequestering of transcription factor (GO:0042994)	1/16	0.0392729	0.792133	0	0	25	80.9305	NFKBIA
positive regulation of endothelial cell chemotaxis (GO:2001028)	1/13	0.0320262	0.793348	0	0	30.7692	105.883	HSPB1
negative regulation of cellular component movement (GO:0051271)	1/15	0.0368633	0.793727	0	0	26.6667	88.0144	ACTN1
regulation of nitric-oxide synthase biosynthetic process (GO:0051769)	1/12	0.0295988	0.79496	0	0	33.3333	117.334	CCL2
negative regulation of lipid storage (GO:0010888)	1/16	0.0392729	0.795277	0	0	25	80.9305	NFKBIA
purine nucleotide catabolic process (GO:0006195)	1/14	0.0344477	0.795415	0	0	28.5714	96.2375	GPX1
positive regulation of response to biotic stimulus (GO:0002833)	1/17	0.0416767	0.796539	0	0	23.5294	74.7721	CYBA
positive regulation of phosphoprotein phosphatase activity (GO:0032516)	1/15	0.0368633	0.79709	0	0	26.6667	88.0144	ITGA1
positive regulation of cholesterol efflux (GO:0010875)	1/13	0.0320262	0.797218	0	0	30.7692	105.883	NFKBIA
hyaluronan catabolic process (GO:0030214)	1/16	0.0392729	0.798445	0	0	25	80.9305	CD44
negative regulation of smooth muscle cell migration (GO:0014912)	1/14	0.0344477	0.79903	0	0	28.5714	96.2375	TPM1
PERK-mediated unfolded protein response (GO:0036499)	1/12	0.0295988	0.799167	0	0	33.3333	117.334	CCL2
nucleotide catabolic process (GO:0009166)	1/17	0.0416767	0.799534	0	0	23.5294	74.7721	GPX1
negative regulation of release of cytochrome c from mitochondria (GO:0090201)	1/15	0.0368633	0.800482	0	0	26.6667	88.0144	GPX1
regulation of triglyceride biosynthetic process (GO:0010866)	1/13	0.0320262	0.801126	0	0	30.7692	105.883	C3
positive regulation of kinase activity (GO:0033674)	2/113	0.0325011	0.801223	0	0	7.07965	24.2583	CD74;CYR61
regulation of glucose transport (GO:0010827)	1/16	0.0392729	0.801639	0	0	25	80.9305	C3
positive regulation of signal transduction by p53 class mediator (GO:1901798)	1/17	0.0416767	0.802551	0	0	23.5294	74.7721	ANKRD1
regulation of monocyte differentiation (GO:0045655)	1/14	0.0344477	0.802679	0	0	28.5714	96.2375	CD74
skeletal muscle cell differentiation (GO:0035914)	1/12	0.0295988	0.803417	0	0	33.3333	117.334	ANKRD1
positive regulation of collagen metabolic process (GO:0010714)	1/15	0.0368633	0.803903	0	0	26.6667	88.0144	VIM
leukocyte tethering or rolling (GO:0050901)	1/16	0.0392729	0.804858	0	0	25	80.9305	VCAM1
regulation of T cell cytokine production (GO:0002724)	1/13	0.0320262	0.805073	0	0	30.7692	105.883	B2M
platelet-derived growth factor receptor signaling pathway (GO:0048008)	1/17	0.0416767	0.805591	0	0	23.5294	74.7721	PLAT
purine-containing compound catabolic process (GO:0072523)	1/14	0.0344477	0.806361	0	0	28.5714	96.2375	GPX1
regulation of mRNA stability (GO:0043488)	2/128	0.0407747	0.806486	0	0	6.25	19.9981	HSPB1;VIM
regulation of peptide secretion (GO:0002791)	1/15	0.0368633	0.807353	0	0	26.6667	88.0144	CD74
positive regulation of protein depolymerization (GO:1901881)	1/12	0.0295988	0.807714	0	0	33.3333	117.334	NES
myoblast differentiation (GO:0045445)	1/16	0.0392729	0.808104	0	0	25	80.9305	ANKRD1
positive regulation of G-protein coupled receptor protein signaling pathway (GO:0045745)	1/17	0.0416767	0.808654	0	0	23.5294	74.7721	C3
prostanoid biosynthetic process (GO:0046457)	1/13	0.0320262	0.809058	0	0	30.7692	105.883	CD74
cellular response to oxygen-containing compound (GO:1901701)	3/274	0.0310751	0.809061	0	0	4.37956	15.203	TPM1;ANKRD1;CCL2
positive regulation of response to cytokine stimulus (GO:0060760)	1/14	0.0344477	0.810077	0	0	28.5714	96.2375	CD74
cytoplasmic sequestering of protein (GO:0051220)	1/15	0.0368633	0.810833	0	0	26.6667	88.0144	NFKBIA
ruffle organization (GO:0031529)	1/16	0.0392729	0.811375	0	0	25	80.9305	TPM1
regulation of lamellipodium organization (GO:1902743)	1/17	0.0416767	0.81174	0	0	23.5294	74.7721	CD44
regulation of endothelial cell chemotaxis (GO:2001026)	1/13	0.0320262	0.813083	0	0	30.7692	105.883	HSPB1
regulation of neural precursor cell proliferation (GO:2000177)	1/14	0.0344477	0.813827	0	0	28.5714	96.2375	NES
regulation of fertilization (GO:0080154)	1/15	0.0368633	0.814343	0	0	26.6667	88.0144	SPINK1
negative regulation of immune effector process (GO:0002698)	1/16	0.0392729	0.814674	0	0	25	80.9305	RPS19
regulation of protein binding (GO:0043393)	2/111	0.0314545	0.814783	0	0	7.20721	24.9313	B2M;NES
regulation of receptor recycling (GO:0001919)	1/17	0.0416767	0.81485	0	0	23.5294	74.7721	ANXA2
negative regulation of macrophage derived foam cell differentiation (GO:0010745)	1/13	0.0320262	0.817149	0	0	30.7692	105.883	NFKBIA
positive regulation of MAPK cascade (GO:0043410)	3/289	0.0355539	0.81726	0	0	4.15225	13.8548	CD74;CCL2;CD44
brain development (GO:0007420)	2/119	0.0357221	0.817444	0	0	6.72269	22.3999	COL4A1;NES
hydrogen peroxide catabolic process (GO:0042744)	1/14	0.0344477	0.817612	0	0	28.5714	96.2375	GPX1
focal adhesion assembly (GO:0048041)	1/18	0.0440745	0.817862	0	0	22.2222	69.375	ACTN1
vitamin D metabolic process (GO:0042359)	1/15	0.0368633	0.817884	0	0	26.6667	88.0144	GC
positive regulation of cholesterol transport (GO:0032376)	1/17	0.0416767	0.817984	0	0	23.5294	74.7721	NFKBIA
fibrinolysis (GO:0042730)	1/16	0.0392729	0.817999	0	0	25	80.9305	PLAT
platelet degranulation (GO:0002576)	2/124	0.0384971	0.818544	0	0	6.45161	21.014	SPARC;ACTN1
prostaglandin biosynthetic process (GO:0001516)	1/18	0.0440745	0.820847	0	0	22.2222	69.375	CD74
regulation of cell migration (GO:0030334)	3/316	0.0444118	0.821136	0	0	3.79747	11.8263	CITED2;TPM1;CYR61
regulation of collagen biosynthetic process (GO:0032965)	1/17	0.0416767	0.821143	0	0	23.5294	74.7721	VIM
regulation of interleukin-1 beta production (GO:0032651)	1/13	0.0320262	0.821255	0	0	30.7692	105.883	HSPB1
embryonic heart tube development (GO:0035050)	1/16	0.0392729	0.821351	0	0	25	80.9305	CITED2
cardiac left ventricle morphogenesis (GO:0003214)	1/14	0.0344477	0.821433	0	0	28.5714	96.2375	CPE
positive regulation of collagen biosynthetic process (GO:0032967)	1/15	0.0368633	0.821456	0	0	26.6667	88.0144	VIM
calcium-mediated signaling using intracellular calcium source (GO:0035584)	1/18	0.0440745	0.823854	0	0	22.2222	69.375	VCAM1
regulation of osteoblast proliferation (GO:0033688)	1/16	0.0392729	0.824731	0	0	25	80.9305	CYR61
myeloid cell development (GO:0061515)	1/15	0.0368633	0.825058	0	0	26.6667	88.0144	ANXA2
negative regulation of secretion (GO:0051048)	1/14	0.0344477	0.82529	0	0	28.5714	96.2375	CD74
response to iron ion (GO:0010039)	1/13	0.0320262	0.825403	0	0	30.7692	105.883	B2M
muscle tissue morphogenesis (GO:0060415)	1/19	0.0464665	0.826196	0	0	21.0526	64.611	ANKRD1
actin filament organization (GO:0007015)	2/120	0.0362706	0.82629	0	0	6.66667	22.1116	ACTN1;TPM1
regulation of oxidative stress-induced intrinsic apoptotic signaling pathway (GO:1902175)	1/18	0.0440745	0.826883	0	0	22.2222	69.375	HSPB1
lipopolysaccharide-mediated signaling pathway (GO:0031663)	1/16	0.0392729	0.828139	0	0	25	80.9305	CCL2
protein O-linked fucosylation (GO:0036066)	1/15	0.0368633	0.828693	0	0	26.6667	88.0144	ADAMTS5
regulation of heterotypic cell-cell adhesion (GO:0034114)	1/19	0.0464665	0.829085	0	0	21.0526	64.611	CD44
positive regulation of neural precursor cell proliferation (GO:2000179)	1/14	0.0344477	0.829182	0	0	28.5714	96.2375	NES
cell-substrate adherens junction assembly (GO:0007045)	1/18	0.0440745	0.829934	0	0	22.2222	69.375	ACTN1
negative regulation of NF-kappaB import into nucleus (GO:0042347)	1/16	0.0392729	0.831576	0	0	25	80.9305	NFKBIA
regulation of cell proliferation (GO:0042127)	5/740	0.0368372	0.83177	0	0	2.7027	8.92229	ADAMTS1;ITGA1;CXCL1;IGFBP7;CXCL2
positive regulation of cellular response to transforming growth factor beta stimulus (GO:1903846)	1/19	0.0464665	0.831994	0	0	21.0526	64.611	CITED2
regulation of peptidase activity (GO:0052547)	1/18	0.0440745	0.833008	0	0	22.2222	69.375	CSTB
positive regulation of DNA damage response, signal transduction by p53 class mediator (GO:0043517)	1/14	0.0344477	0.833112	0	0	28.5714	96.2375	ANKRD1
sulfur compound transport (GO:0072348)	1/19	0.0464665	0.834924	0	0	21.0526	64.611	SLC6A6
negative regulation of cell migration (GO:0030336)	2/121	0.0368224	0.835131	0	0	6.61157	21.8291	CITED2;TPM1
regulation of cholesterol efflux (GO:0010874)	1/18	0.0440745	0.836105	0	0	22.2222	69.375	NFKBIA
positive regulation of peptidyl-tyrosine phosphorylation (GO:0050731)	2/116	0.0340965	0.836513	0	0	6.89655	23.3004	CD74;CD44
positive regulation of heart rate (GO:0010460)	1/14	0.0344477	0.837079	0	0	28.5714	96.2375	TPM1
regulation of transcription factor import into nucleus (GO:0042990)	1/19	0.0464665	0.837874	0	0	21.0526	64.611	NFKBIA
negative regulation of oxidative stress-induced intrinsic apoptotic signaling pathway (GO:1902176)	1/18	0.0440745	0.839224	0	0	22.2222	69.375	HSPB1
osteoclast differentiation (GO:0030316)	1/19	0.0464665	0.840845	0	0	21.0526	64.611	ANXA2
branching involved in blood vessel morphogenesis (GO:0001569)	1/14	0.0344477	0.841085	0	0	28.5714	96.2375	COL4A1
positive regulation of lipid storage (GO:0010884)	1/19	0.0464665	0.843837	0	0	21.0526	64.611	C3
negative regulation of sequence-specific DNA binding transcription factor activity (GO:0043433)	2/140	0.0479027	0.845839	0	0	5.71429	17.3633	NFKBIA;ID3
positive regulation of toll-like receptor signaling pathway (GO:0034123)	1/19	0.0464665	0.846851	0	0	21.0526	64.611	CYBA
response to lipid (GO:0033993)	2/140	0.0479027	0.848776	0	0	5.71429	17.3633	CXCL1;CXCL2
ribosomal small subunit assembly (GO:0000028)	1/19	0.0464665	0.849886	0	0	21.0526	64.611	RPS19
cell-cell adhesion via plasma-membrane adhesion molecules (GO:0098742)	2/142	0.0491322	0.849904	0	0	5.6338	16.976	CDH6;VCAM1
purine nucleotide metabolic process (GO:0006163)	1/20	0.0488525	0.850835	0	0	20	60.379	GPX1
positive regulation of macromolecule biosynthetic process (GO:0010557)	2/142	0.0491322	0.852795	0	0	5.6338	16.976	CCL2;VIM
regulation of protein kinase A signaling (GO:0010738)	1/19	0.0464665	0.852944	0	0	21.0526	64.611	AKAP12
regulation of cell development (GO:0060284)	1/20	0.0488525	0.853749	0	0	20	60.379	RPS19
positive regulation of transforming growth factor beta receptor signaling pathway (GO:0030511)	1/19	0.0464665	0.856023	0	0	21.0526	64.611	CITED2
regulation of vacuole organization (GO:0044088)	1/20	0.0488525	0.856682	0	0	20	60.379	ANXA2
negative regulation of innate immune response (GO:0045824)	1/20	0.0488525	0.859636	0	0	20	60.379	RPS19
positive regulation of T cell mediated immunity (GO:0002711)	1/21	0.0512328	0.862841	0	0	19.0476	56.5976	B2M
ventricular cardiac muscle tissue development (GO:0003229)	1/21	0.0512328	0.865698	0	0	19.0476	56.5976	TPM1
hepaticobiliary system development (GO:0061008)	1/21	0.0512328	0.868575	0	0	19.0476	56.5976	CITED2
regulation of macrophage activation (GO:0043030)	1/21	0.0512328	0.87147	0	0	19.0476	56.5976	CD74
ventricular septum morphogenesis (GO:0060412)	1/21	0.0512328	0.874384	0	0	19.0476	56.5976	CITED2
viral genome replication (GO:0019079)	1/22	0.0536072	0.876787	0	0	18.1818	53.2013	CCL2
regulation of protein kinase activity (GO:0045859)	2/147	0.0522559	0.877177	0	0	5.44218	16.0631	HSPB1;CYR61
positive regulation of BMP signaling pathway (GO:0030513)	1/21	0.0512328	0.877319	0	0	19.0476	56.5976	CYR61
positive regulation of phosphatase activity (GO:0010922)	1/22	0.0536072	0.879606	0	0	18.1818	53.2013	ITGA1
positive regulation of cellular component movement (GO:0051272)	1/21	0.0512328	0.880273	0	0	19.0476	56.5976	RPS19
negative regulation of actin filament polymerization (GO:0030837)	1/22	0.0536072	0.882444	0	0	18.1818	53.2013	TMSB10
hyaluronan metabolic process (GO:0030212)	1/21	0.0512328	0.883246	0	0	19.0476	56.5976	CD44
regulated exocytosis (GO:0045055)	2/148	0.0528891	0.884895	0	0	5.40541	15.8895	SPARC;ACTN1
positive regulation of biosynthetic process (GO:0009891)	1/22	0.0536072	0.885299	0	0	18.1818	53.2013	CYBA
regulation of calcium ion import (GO:0090279)	1/22	0.0536072	0.888174	0	0	18.1818	53.2013	CCL2
STAT cascade (GO:0097696)	1/22	0.0536072	0.891067	0	0	18.1818	53.2013	CCL2
regulation of DNA biosynthetic process (GO:2000278)	1/22	0.0536072	0.893979	0	0	18.1818	53.2013	ANKRD1
cell-cell adhesion mediated by cadherin (GO:0044331)	1/23	0.0559758	0.901086	0	0	17.3913	50.1363	CDH6
regulation of proteolysis involved in cellular protein catabolic process (GO:1903050)	1/23	0.0559758	0.903938	0	0	17.3913	50.1363	GPX1
membrane assembly (GO:0071709)	1/23	0.0559758	0.906808	0	0	17.3913	50.1363	ANXA2
negative regulation of transcription factor import into nucleus (GO:0042992)	1/23	0.0559758	0.909696	0	0	17.3913	50.1363	NFKBIA
vitamin transport (GO:0051180)	1/23	0.0559758	0.912602	0	0	17.3913	50.1363	GC
camera-type eye development (GO:0043010)	1/24	0.0583386	0.918832	0	0	16.6667	47.3582	NES
negative regulation of oxidative stress-induced cell death (GO:1903202)	1/24	0.0583386	0.921677	0	0	16.6667	47.3582	HSPB1
transition metal ion homeostasis (GO:0055076)	1/24	0.0583386	0.924539	0	0	16.6667	47.3582	B2M
positive regulation of vascular endothelial growth factor production (GO:0010575)	1/24	0.0583386	0.927419	0	0	16.6667	47.3582	C3
eosinophil chemotaxis (GO:0048245)	1/24	0.0583386	0.930318	0	0	16.6667	47.3582	CCL2
positive regulation of immune effector process (GO:0002699)	1/24	0.0583386	0.933234	0	0	16.6667	47.3582	RPS19
eosinophil migration (GO:0072677)	1/24	0.0583386	0.936169	0	0	16.6667	47.3582	CCL2
prostaglandin metabolic process (GO:0006693)	1/25	0.0606955	0.944297	0	0	16	44.8302	CD74
positive regulation of glucose transport (GO:0010828)	1/25	0.0606955	0.947184	0	0	16	44.8302	C3
regulation of vascular smooth muscle cell proliferation (GO:1904705)	1/25	0.0606955	0.95009	0	0	16	44.8302	TPM1
cellular response to vascular endothelial growth factor stimulus (GO:0035924)	1/25	0.0606955	0.953013	0	0	16	44.8302	HSPB1
negative regulation of catalytic activity (GO:0043086)	1/26	0.0630467	0.963256	0	0	15.3846	42.5212	NES
fat-soluble vitamin metabolic process (GO:0006775)	1/26	0.0630467	0.966148	0	0	15.3846	42.5212	GC
regulation of supramolecular fiber organization (GO:1902903)	1/26	0.0630467	0.969059	0	0	15.3846	42.5212	GPX1
regulation of muscle contraction (GO:0006937)	1/26	0.0630467	0.971986	0	0	15.3846	42.5212	TPM1
positive regulation of I-kappaB kinase/NF-kappaB signaling (GO:0043123)	2/163	0.0627089	0.972655	0	0	4.90798	13.5914	CD74;LGALS1
regulation of NF-kappaB import into nucleus (GO:0042345)	1/26	0.0630467	0.974932	0	0	15.3846	42.5212	NFKBIA
leukocyte cell-cell adhesion (GO:0007159)	1/27	0.0653922	0.987267	0	0	14.8148	40.4052	VCAM1
negative regulation of smooth muscle cell proliferation (GO:0048662)	1/27	0.0653922	0.990196	0	0	14.8148	40.4052	TPM1
regulation of vascular endothelial growth factor production (GO:0010574)	1/27	0.0653922	0.993143	0	0	14.8148	40.4052	C3
phosphatidylcholine acyl-chain remodeling (GO:0036151)	1/27	0.0653922	0.996108	0	0	14.8148	40.4052	DBI
regulation of defense response to virus by virus (GO:0050690)	1/28	0.0677318	1	0	0	14.2857	38.46	B2M
ventricular septum development (GO:0003281)	1/28	0.0677318	1	0	0	14.2857	38.46	CITED2
carboxylic acid catabolic process (GO:0046395)	1/28	0.0677318	1	0	0	14.2857	38.46	CD44
regulation of lipid biosynthetic process (GO:0046890)	1/28	0.0677318	1	0	0	14.2857	38.46	C3
antigen processing and presentation of peptide antigen via MHC class I (GO:0002474)	1/28	0.0677318	1	0	0	14.2857	38.46	B2M
positive regulation of hydrolase activity (GO:0051345)	2/172	0.068876	1	0	0	4.65116	12.4439	TPM1;CCL2
regulation of macrophage derived foam cell differentiation (GO:0010743)	1/29	0.0700658	1	0	0	13.7931	36.6665	NFKBIA
amino acid transmembrane transport (GO:0003333)	1/29	0.0700658	1	0	0	13.7931	36.6665	SLC6A6
regulation of cellular biosynthetic process (GO:0031326)	1/29	0.0700658	1	0	0	13.7931	36.6665	C3
superoxide metabolic process (GO:0006801)	1/29	0.0700658	1	0	0	13.7931	36.6665	CYBA
determination of bilateral symmetry (GO:0009855)	1/29	0.0700658	1	0	0	13.7931	36.6665	CITED2
regulation of angiogenesis (GO:0045765)	2/177	0.072386	1	0	0	4.51977	11.8678	SPARC;HSPB1
positive regulation of B cell proliferation (GO:0030890)	1/30	0.072394	1	0	0	13.3333	35.0084	CD74
negative regulation of DNA biosynthetic process (GO:2000279)	1/30	0.072394	1	0	0	13.3333	35.0084	ANKRD1
negative regulation of endothelial cell proliferation (GO:0001937)	1/30	0.072394	1	0	0	13.3333	35.0084	SPARC
connective tissue development (GO:0061448)	1/30	0.072394	1	0	0	13.3333	35.0084	CD44
positive regulation of reactive oxygen species biosynthetic process (GO:1903428)	1/30	0.072394	1	0	0	13.3333	35.0084	CYBA
cellular response to lipid (GO:0071396)	2/178	0.0730949	1	0	0	4.49438	11.7573	ANKRD1;CCL2
positive regulation of interleukin-1 beta production (GO:0032731)	1/31	0.0747165	1	0	0	12.9032	33.4717	HSPB1
liver development (GO:0001889)	1/31	0.0747165	1	0	0	12.9032	33.4717	CITED2
anterograde axonal transport (GO:0008089)	1/31	0.0747165	1	0	0	12.9032	33.4717	HSPB1
negative regulation of extrinsic apoptotic signaling pathway via death domain receptors (GO:1902042)	1/31	0.0747165	1	0	0	12.9032	33.4717	GPX1
positive regulation of protein dephosphorylation (GO:0035307)	1/31	0.0747165	1	0	0	12.9032	33.4717	ITGA1
transmembrane receptor protein tyrosine kinase signaling pathway (GO:0007169)	3/396	0.0763844	1	0	0	3.0303	7.79387	HSPB1;PLAT;CYBA
regulation of cell-cell adhesion (GO:0022407)	1/32	0.0770333	1	0	0	12.5	32.044	CITED2
positive regulation of myeloid leukocyte differentiation (GO:0002763)	1/32	0.0770333	1	0	0	12.5	32.044	CD74
positive regulation of tumor necrosis factor superfamily cytokine production (GO:1903557)	1/32	0.0770333	1	0	0	12.5	32.044	CYBA
platelet aggregation (GO:0070527)	1/33	0.0793444	1	0	0	12.1212	30.7146	HSPB1
positive regulation of cytokine-mediated signaling pathway (GO:0001961)	1/33	0.0793444	1	0	0	12.1212	30.7146	CD74
negative regulation of neurogenesis (GO:0050768)	1/33	0.0793444	1	0	0	12.1212	30.7146	ID3
positive regulation of organelle organization (GO:0010638)	1/33	0.0793444	1	0	0	12.1212	30.7146	ANXA2
negative regulation of mitochondrion organization (GO:0010823)	1/33	0.0793444	1	0	0	12.1212	30.7146	GPX1
positive regulation of calcium ion transport (GO:0051928)	1/33	0.0793444	1	0	0	12.1212	30.7146	CCL2
negative regulation of multi-organism process (GO:0043901)	1/33	0.0793444	1	0	0	12.1212	30.7146	ANXA2
positive regulation of chemokine production (GO:0032722)	1/34	0.0816498	1	0	0	11.7647	29.4743	CD74
epithelial tube morphogenesis (GO:0060562)	1/34	0.0816498	1	0	0	11.7647	29.4743	COL4A1
ventricular cardiac muscle tissue morphogenesis (GO:0055010)	1/34	0.0816498	1	0	0	11.7647	29.4743	TPM1
positive regulation of ATPase activity (GO:0032781)	1/35	0.0839496	1	0	0	11.4286	28.3147	TPM1
regulation of phosphoprotein phosphatase activity (GO:0043666)	1/35	0.0839496	1	0	0	11.4286	28.3147	ITGA1
carboxylic acid transmembrane transport (GO:1905039)	1/35	0.0839496	1	0	0	11.4286	28.3147	SLC6A6
positive regulation of peptide secretion (GO:0002793)	1/35	0.0839496	1	0	0	11.4286	28.3147	ANKRD1
erythrocyte differentiation (GO:0030218)	1/35	0.0839496	1	0	0	11.4286	28.3147	RPS19
maturation of SSU-rRNA from tricistronic rRNA transcript (SSU-rRNA, 5.8S rRNA, LSU-rRNA) (GO:0000462)	1/35	0.0839496	1	0	0	11.4286	28.3147	RPS19
positive regulation of osteoblast differentiation (GO:0045669)	1/35	0.0839496	1	0	0	11.4286	28.3147	CYR61
protein kinase B signaling (GO:0043491)	1/35	0.0839496	1	0	0	11.4286	28.3147	CCL2
regulation of receptor-mediated endocytosis (GO:0048259)	1/36	0.0862437	1	0	0	11.1111	27.2286	B2M
cardiac muscle tissue development (GO:0048738)	1/36	0.0862437	1	0	0	11.1111	27.2286	ANKRD1
muscle cell differentiation (GO:0042692)	1/36	0.0862437	1	0	0	11.1111	27.2286	ANKRD1
regulation of blood circulation (GO:1903522)	1/36	0.0862437	1	0	0	11.1111	27.2286	TPM1
positive regulation of signaling (GO:0023056)	1/36	0.0862437	1	0	0	11.1111	27.2286	ANXA2
cardiac muscle contraction (GO:0060048)	1/36	0.0862437	1	0	0	11.1111	27.2286	TPM1
zymogen activation (GO:0031638)	1/36	0.0862437	1	0	0	11.1111	27.2286	PLAT
negative regulation of blood coagulation (GO:0030195)	1/36	0.0862437	1	0	0	11.1111	27.2286	PLAT
positive regulation of stress fiber assembly (GO:0051496)	1/37	0.0885322	1	0	0	10.8108	26.2096	TPM1
positive regulation of multi-organism process (GO:0043902)	1/37	0.0885322	1	0	0	10.8108	26.2096	CYBA
positive regulation of receptor activity (GO:2000273)	1/37	0.0885322	1	0	0	10.8108	26.2096	ANXA2
homotypic cell-cell adhesion (GO:0034109)	1/38	0.0908151	1	0	0	10.5263	25.2519	HSPB1
positive regulation of innate immune response (GO:0045089)	1/38	0.0908151	1	0	0	10.5263	25.2519	RPS19
regulation of MAPK cascade (GO:0043408)	2/203	0.09152	1	0	0	3.94089	9.42344	CD74;CYR61
positive regulation of reactive oxygen species metabolic process (GO:2000379)	1/39	0.0930924	1	0	0	10.2564	24.3504	CYBA
skeletal muscle tissue development (GO:0007519)	1/39	0.0930924	1	0	0	10.2564	24.3504	ANKRD1
regulation of extrinsic apoptotic signaling pathway via death domain receptors (GO:1902041)	1/39	0.0930924	1	0	0	10.2564	24.3504	GPX1
acyl-CoA metabolic process (GO:0006637)	1/39	0.0930924	1	0	0	10.2564	24.3504	DBI
regulation of proteasomal protein catabolic process (GO:0061136)	1/39	0.0930924	1	0	0	10.2564	24.3504	GPX1
positive regulation of cytokine biosynthetic process (GO:0042108)	1/40	0.0953641	1	0	0	10	23.5005	HSPB1
regulation of ATPase activity (GO:0043462)	1/40	0.0953641	1	0	0	10	23.5005	TPM1
regulation of release of cytochrome c from mitochondria (GO:0090199)	1/40	0.0953641	1	0	0	10	23.5005	GPX1
negative regulation of epidermal growth factor receptor signaling pathway (GO:0042059)	1/40	0.0953641	1	0	0	10	23.5005	ITGA1
JAK-STAT cascade (GO:0007259)	1/40	0.0953641	1	0	0	10	23.5005	CCL2
regulation of phagocytosis (GO:0050764)	1/41	0.0976302	1	0	0	9.7561	22.6982	CYBA
calcium-dependent cell-cell adhesion via plasma membrane cell adhesion molecules (GO:0016339)	1/41	0.0976302	1	0	0	9.7561	22.6982	CDH6
regulation of translation (GO:0006417)	2/213	0.0992376	1	0	0	3.75587	8.67695	HSPB1;VIM
regulation of interleukin-6 production (GO:0032675)	1/42	0.0998908	1	0	0	9.52381	21.9398	CYBA
regulation of protein modification process (GO:0031399)	1/42	0.0998908	1	0	0	9.52381	21.9398	HSPB1
determination of left/right symmetry (GO:0007368)	1/42	0.0998908	1	0	0	9.52381	21.9398	CITED2
regulation of cell cycle (GO:0051726)	2/215	0.100803	1	0	0	3.72093	8.538	CITED2;ID3
regulation of B cell proliferation (GO:0030888)	1/43	0.102146	1	0	0	9.30233	21.2219	CD74
negative regulation of ERBB signaling pathway (GO:1901185)	1/43	0.102146	1	0	0	9.30233	21.2219	ITGA1
response to unfolded protein (GO:0006986)	1/43	0.102146	1	0	0	9.30233	21.2219	HSPB1
negative regulation of DNA metabolic process (GO:0051053)	1/43	0.102146	1	0	0	9.30233	21.2219	ANKRD1
response to hydrogen peroxide (GO:0042542)	1/43	0.102146	1	0	0	9.30233	21.2219	GPX1
positive regulation of interleukin-6 production (GO:0032755)	1/43	0.102146	1	0	0	9.30233	21.2219	CYBA
branching morphogenesis of an epithelial tube (GO:0048754)	1/43	0.102146	1	0	0	9.30233	21.2219	COL4A1
regulation of multicellular organismal development (GO:2000026)	1/43	0.102146	1	0	0	9.30233	21.2219	GPX1
central nervous system development (GO:0007417)	2/217	0.102375	1	0	0	3.68664	8.40225	COL4A1;NES
ribosomal small subunit biogenesis (GO:0042274)	1/44	0.104395	1	0	0	9.09091	20.5416	RPS19
adherens junction organization (GO:0034332)	1/44	0.104395	1	0	0	9.09091	20.5416	CDH6
positive regulation of actin filament bundle assembly (GO:0032233)	1/44	0.104395	1	0	0	9.09091	20.5416	TPM1
lymphocyte chemotaxis (GO:0048247)	1/44	0.104395	1	0	0	9.09091	20.5416	CCL2
regulation of T cell activation (GO:0050863)	1/44	0.104395	1	0	0	9.09091	20.5416	CCL2
myeloid cell differentiation (GO:0030099)	1/44	0.104395	1	0	0	9.09091	20.5416	RPS19
positive regulation of cytokine production (GO:0001819)	2/220	0.104747	1	0	0	3.63636	8.20441	C3;CYBA
nucleus organization (GO:0006997)	1/45	0.106639	1	0	0	8.88889	19.896	RPS19
positive regulation of blood vessel endothelial cell migration (GO:0043536)	1/45	0.106639	1	0	0	8.88889	19.896	HSPB1
interleukin-12-mediated signaling pathway (GO:0035722)	1/46	0.108878	1	0	0	8.69565	19.2829	ANXA2
cellular response to interleukin-12 (GO:0071349)	1/46	0.108878	1	0	0	8.69565	19.2829	ANXA2
cartilage development (GO:0051216)	1/46	0.108878	1	0	0	8.69565	19.2829	CD44
icosanoid metabolic process (GO:0006690)	1/46	0.108878	1	0	0	8.69565	19.2829	GPX1
maturation of SSU-rRNA (GO:0030490)	1/46	0.108878	1	0	0	8.69565	19.2829	RPS19
pyruvate metabolic process (GO:0006090)	1/46	0.108878	1	0	0	8.69565	19.2829	LDHB
heterophilic cell-cell adhesion via plasma membrane cell adhesion molecules (GO:0007157)	1/47	0.111111	1	0	0	8.51064	18.6998	VCAM1
negative regulation of I-kappaB kinase/NF-kappaB signaling (GO:0043124)	1/47	0.111111	1	0	0	8.51064	18.6998	NFKBIA
amino acid transport (GO:0006865)	1/48	0.113338	1	0	0	8.33333	18.1448	SLC6A6
cellular response to mechanical stimulus (GO:0071260)	1/48	0.113338	1	0	0	8.33333	18.1448	ANKRD1
positive regulation of response to DNA damage stimulus (GO:2001022)	1/49	0.11556	1	0	0	8.16327	17.616	ANKRD1
glutathione metabolic process (GO:0006749)	1/49	0.11556	1	0	0	8.16327	17.616	GPX1
antimicrobial humoral immune response mediated by antimicrobial peptide (GO:0061844)	1/49	0.11556	1	0	0	8.16327	17.616	RPS19
regulation of cellular protein metabolic process (GO:0032268)	1/50	0.117777	1	0	0	8	17.1117	NFKBIA
heart morphogenesis (GO:0003007)	1/50	0.117777	1	0	0	8	17.1117	ANKRD1
wound healing (GO:0042060)	1/50	0.117777	1	0	0	8	17.1117	TPM1
blood circulation (GO:0008015)	1/50	0.117777	1	0	0	8	17.1117	GPX1
regulation of blood vessel endothelial cell migration (GO:0043535)	1/50	0.117777	1	0	0	8	17.1117	HSPB1
coenzyme metabolic process (GO:0006732)	1/51	0.119988	1	0	0	7.84314	16.6303	DBI
carboxylic acid transport (GO:0046942)	1/51	0.119988	1	0	0	7.84314	16.6303	SLC6A6
B cell differentiation (GO:0030183)	1/52	0.122193	1	0	0	7.69231	16.1704	VCAM1
positive regulation of ossification (GO:0045778)	1/52	0.122193	1	0	0	7.69231	16.1704	CYR61
positive regulation of secretion by cell (GO:1903532)	1/52	0.122193	1	0	0	7.69231	16.1704	ANKRD1
embryonic organ development (GO:0048568)	1/53	0.124393	1	0	0	7.54717	15.7306	NES
neutrophil chemotaxis (GO:0030593)	1/53	0.124393	1	0	0	7.54717	15.7306	CCL2
cell morphogenesis involved in differentiation (GO:0000904)	1/54	0.126588	1	0	0	7.40741	15.3097	ACTN1
regulation of cellular catabolic process (GO:0031329)	1/55	0.128778	1	0	0	7.27273	14.9067	HSPB1
regulation of BMP signaling pathway (GO:0030510)	1/56	0.130962	1	0	0	7.14286	14.5204	CYR61
ribosome assembly (GO:0042255)	1/56	0.130962	1	0	0	7.14286	14.5204	RPS19
cellular iron ion homeostasis (GO:0006879)	1/56	0.130962	1	0	0	7.14286	14.5204	CP
positive regulation of protein transport (GO:0051222)	1/56	0.130962	1	0	0	7.14286	14.5204	ANKRD1
granulocyte chemotaxis (GO:0071621)	1/56	0.130962	1	0	0	7.14286	14.5204	CCL2
glycosaminoglycan catabolic process (GO:0006027)	1/56	0.130962	1	0	0	7.14286	14.5204	CD44
I-kappaB kinase/NF-kappaB signaling (GO:0007249)	1/57	0.133141	1	0	0	7.01754	14.1498	NFKBIA
neutrophil migration (GO:1990266)	1/58	0.135314	1	0	0	6.89655	13.7942	CCL2
regulation of epidermal growth factor receptor signaling pathway (GO:0042058)	1/58	0.135314	1	0	0	6.89655	13.7942	ITGA1
integrin-mediated signaling pathway (GO:0007229)	1/58	0.135314	1	0	0	6.89655	13.7942	ADAMTS1
negative regulation of cellular macromolecule biosynthetic process (GO:2000113)	3/512	0.135936	1	0	0	2.34375	4.67712	CITED2;ANKRD1;ID3
cell morphogenesis (GO:0000902)	1/59	0.137482	1	0	0	6.77966	13.4526	CDH6
cell junction assembly (GO:0034329)	1/59	0.137482	1	0	0	6.77966	13.4526	CDH6
positive regulation of protein binding (GO:0032092)	1/60	0.139645	1	0	0	6.66667	13.1244	B2M
regulation of stress fiber assembly (GO:0051492)	1/60	0.139645	1	0	0	6.66667	13.1244	TPM1
positive regulation of T cell proliferation (GO:0042102)	1/61	0.141802	1	0	0	6.55738	12.8087	VCAM1
striated muscle contraction (GO:0006941)	1/61	0.141802	1	0	0	6.55738	12.8087	TPM1
regulation of tumor necrosis factor production (GO:0032680)	1/61	0.141802	1	0	0	6.55738	12.8087	CYBA
positive regulation of cellular amide metabolic process (GO:0034250)	1/61	0.141802	1	0	0	6.55738	12.8087	VIM
regulation of vesicle fusion (GO:0031338)	1/61	0.141802	1	0	0	6.55738	12.8087	ANXA2
negative regulation of peptidase activity (GO:0010466)	1/62	0.143954	1	0	0	6.45161	12.5049	CSTB
negative regulation of intrinsic apoptotic signaling pathway (GO:2001243)	1/62	0.143954	1	0	0	6.45161	12.5049	HSPB1
cellular amide metabolic process (GO:0043603)	1/62	0.143954	1	0	0	6.45161	12.5049	CPE
regulation of T cell proliferation (GO:0042129)	1/62	0.143954	1	0	0	6.45161	12.5049	VCAM1
regulation of translational initiation (GO:0006446)	1/62	0.143954	1	0	0	6.45161	12.5049	HSPB1
regulation of programmed cell death (GO:0043067)	2/268	0.144525	1	0	0	2.98507	5.77405	LGALS1;ACTN1
negative regulation of neuron apoptotic process (GO:0043524)	1/63	0.146101	1	0	0	6.34921	12.2124	CCL2
adenylate cyclase-inhibiting G-protein coupled receptor signaling pathway (GO:0007193)	1/63	0.146101	1	0	0	6.34921	12.2124	AKAP12
negative regulation of neuron differentiation (GO:0045665)	1/64	0.148242	1	0	0	6.25	11.9307	ID3
homophilic cell adhesion via plasma membrane adhesion molecules (GO:0007156)	1/64	0.148242	1	0	0	6.25	11.9307	CDH6
cellular response to reactive oxygen species (GO:0034614)	1/65	0.150378	1	0	0	6.15385	11.6591	TPM1
negative regulation of apoptotic signaling pathway (GO:2001234)	1/65	0.150378	1	0	0	6.15385	11.6591	GPX1
negative regulation of blood vessel morphogenesis (GO:2000181)	1/65	0.150378	1	0	0	6.15385	11.6591	SPARC
positive regulation of macromolecule metabolic process (GO:0010604)	2/276	0.151439	1	0	0	2.89855	5.47123	ANXA2;CITED2
negative regulation of epithelial cell proliferation (GO:0050680)	1/66	0.152509	1	0	0	6.06061	11.3971	SPARC
response to interferon-gamma (GO:0034341)	1/68	0.156756	1	0	0	5.88235	10.9004	CCL2
negative regulation of angiogenesis (GO:0016525)	1/69	0.158871	1	0	0	5.7971	10.6647	SPARC
response to organic cyclic compound (GO:0014070)	1/69	0.158871	1	0	0	5.7971	10.6647	CCL2
regulation of endothelial cell migration (GO:0010594)	1/69	0.158871	1	0	0	5.7971	10.6647	SPARC
regulation of osteoblast differentiation (GO:0045667)	1/69	0.158871	1	0	0	5.7971	10.6647	CYR61
negative regulation of developmental process (GO:0051093)	1/70	0.160981	1	0	0	5.71429	10.437	ANXA2
neuropeptide signaling pathway (GO:0007218)	1/70	0.160981	1	0	0	5.71429	10.437	CPE
calcium-mediated signaling (GO:0019722)	1/70	0.160981	1	0	0	5.71429	10.437	VCAM1
phosphatidylcholine metabolic process (GO:0046470)	1/71	0.163086	1	0	0	5.6338	10.2168	DBI
defense response to Gram-negative bacterium (GO:0050829)	1/71	0.163086	1	0	0	5.6338	10.2168	RPS19
proteolysis (GO:0006508)	2/291	0.164578	1	0	0	2.74914	4.96048	CPE;PLAT
cell-cell junction organization (GO:0045216)	1/72	0.165186	1	0	0	5.55556	10.0038	CDH6
regulation of epithelial cell proliferation (GO:0050678)	1/72	0.165186	1	0	0	5.55556	10.0038	GPX1
B cell activation (GO:0042113)	1/73	0.16728	1	0	0	5.47945	9.79772	VCAM1
lymphocyte differentiation (GO:0030098)	1/73	0.16728	1	0	0	5.47945	9.79772	VCAM1
regulation of gene expression, epigenetic (GO:0040029)	1/74	0.16937	1	0	0	5.40541	9.59822	GPX1
positive regulation of epithelial cell migration (GO:0010634)	1/74	0.16937	1	0	0	5.40541	9.59822	SPARC
regulation of G-protein coupled receptor protein signaling pathway (GO:0008277)	1/74	0.16937	1	0	0	5.40541	9.59822	C3
nitrogen compound transport (GO:0071705)	1/74	0.16937	1	0	0	5.40541	9.59822	SLC6A6
gland development (GO:0048732)	1/75	0.171454	1	0	0	5.33333	9.40502	CITED2
negative regulation of extrinsic apoptotic signaling pathway (GO:2001237)	1/76	0.173533	1	0	0	5.26316	9.21782	GPX1
nucleic acid-templated transcription (GO:0097659)	1/76	0.173533	1	0	0	5.26316	9.21782	PTMA
positive regulation of cytoskeleton organization (GO:0051495)	1/77	0.175607	1	0	0	5.19481	9.03639	NES
regulation of transcription from RNA polymerase II promoter in response to hypoxia (GO:0061418)	1/78	0.177676	1	0	0	5.12821	8.86048	CITED2
positive regulation of translation (GO:0045727)	1/78	0.177676	1	0	0	5.12821	8.86048	VIM
negative regulation of inflammatory response (GO:0050728)	1/78	0.177676	1	0	0	5.12821	8.86048	RPS19
regulation of endothelial cell proliferation (GO:0001936)	1/79	0.17974	1	0	0	5.06329	8.68984	SPARC
regulation of transforming growth factor beta receptor signaling pathway (GO:0017015)	1/79	0.17974	1	0	0	5.06329	8.68984	CITED2
cell-cell junction assembly (GO:0007043)	1/79	0.17974	1	0	0	5.06329	8.68984	CDH6
positive regulation of binding (GO:0051099)	1/81	0.183852	1	0	0	4.93827	8.36356	B2M
negative regulation of cell death (GO:0060548)	1/81	0.183852	1	0	0	4.93827	8.36356	CYR61
positive regulation of protein secretion (GO:0050714)	1/82	0.185901	1	0	0	4.87805	8.20751	ANKRD1
regulation of anatomical structure morphogenesis (GO:0022603)	1/82	0.185901	1	0	0	4.87805	8.20751	SPARC
negative regulation of NF-kappaB transcription factor activity (GO:0032088)	1/82	0.185901	1	0	0	4.87805	8.20751	NFKBIA
positive regulation of cell cycle (GO:0045787)	1/82	0.185901	1	0	0	4.87805	8.20751	CITED2
negative regulation of endopeptidase activity (GO:0010951)	1/83	0.187945	1	0	0	4.81928	8.05594	SPINK1
positive regulation of peptidyl-serine phosphorylation (GO:0033138)	1/83	0.187945	1	0	0	4.81928	8.05594	CD44
protein maturation (GO:0051604)	1/83	0.187945	1	0	0	4.81928	8.05594	CPE
negative regulation of neuron death (GO:1901215)	1/83	0.187945	1	0	0	4.81928	8.05594	CCL2
regulation of neuron differentiation (GO:0045664)	1/84	0.189983	1	0	0	4.7619	7.90866	ID3
positive regulation of supramolecular fiber organization (GO:1902905)	1/84	0.189983	1	0	0	4.7619	7.90866	GPX1
regulation of peptidyl-serine phosphorylation (GO:0033135)	1/86	0.194046	1	0	0	4.65116	7.62634	CD44
cellular protein localization (GO:0034613)	2/327	0.196865	1	0	0	2.44648	3.97611	CD74;CPE
SRP-dependent cotranslational protein targeting to membrane (GO:0006614)	1/89	0.200101	1	0	0	4.49438	7.23115	RPS19
regulation of neuron apoptotic process (GO:0043523)	1/89	0.200101	1	0	0	4.49438	7.23115	CCL2
regulation of cytokine-mediated signaling pathway (GO:0001959)	1/90	0.20211	1	0	0	4.44444	7.10641	CD74
negative regulation of kinase activity (GO:0033673)	1/91	0.204114	1	0	0	4.3956	6.98496	HSPB1
cellular transition metal ion homeostasis (GO:0046916)	1/93	0.208106	1	0	0	4.30108	6.75142	CP
cotranslational protein targeting to membrane (GO:0006613)	1/93	0.208106	1	0	0	4.30108	6.75142	RPS19
axon development (GO:0061564)	1/94	0.210095	1	0	0	4.25532	6.63912	S100A6
regulation of heart contraction (GO:0008016)	1/95	0.21208	1	0	0	4.21053	6.52966	TPM1
interleukin-1-mediated signaling pathway (GO:0070498)	1/95	0.21208	1	0	0	4.21053	6.52966	NFKBIA
regulation of cell death (GO:0010941)	1/96	0.214059	1	0	0	4.16667	6.42294	CYR61
positive regulation of protein metabolic process (GO:0051247)	1/96	0.214059	1	0	0	4.16667	6.42294	NFKBIA
cell morphogenesis involved in neuron differentiation (GO:0048667)	1/97	0.216033	1	0	0	4.12371	6.31886	S100A6
antigen processing and presentation of exogenous peptide antigen (GO:0002478)	1/97	0.216033	1	0	0	4.12371	6.31886	CD74
protein targeting to ER (GO:0045047)	1/97	0.216033	1	0	0	4.12371	6.31886	RPS19
antigen processing and presentation of exogenous peptide antigen via MHC class II (GO:0019886)	1/97	0.216033	1	0	0	4.12371	6.31886	CD74
response to UV (GO:0009411)	1/98	0.218003	1	0	0	4.08163	6.21734	GPX1
antigen processing and presentation of peptide antigen via MHC class II (GO:0002495)	1/98	0.218003	1	0	0	4.08163	6.21734	CD74
steroid metabolic process (GO:0008202)	1/99	0.219967	1	0	0	4.0404	6.11829	GC
regulation of lipid metabolic process (GO:0019216)	1/100	0.221927	1	0	0	4	6.02163	ANKRD1
cellular response to metal ion (GO:0071248)	1/100	0.221927	1	0	0	4	6.02163	B2M
cellular response to transforming growth factor beta stimulus (GO:0071560)	1/100	0.221927	1	0	0	4	6.02163	ANKRD1
protein processing (GO:0016485)	1/101	0.223882	1	0	0	3.9604	5.92727	CPE
regulation of kinase activity (GO:0043549)	1/101	0.223882	1	0	0	3.9604	5.92727	CD74
positive regulation of angiogenesis (GO:0045766)	1/103	0.227777	1	0	0	3.8835	5.74519	HSPB1
plasma membrane invagination (GO:0099024)	1/103	0.227777	1	0	0	3.8835	5.74519	C3
positive regulation of vasculature development (GO:1904018)	1/104	0.229718	1	0	0	3.84615	5.65732	HSPB1
positive regulation of lymphocyte activation (GO:0051251)	1/104	0.229718	1	0	0	3.84615	5.65732	CCL2
phagocytosis, engulfment (GO:0006911)	1/104	0.229718	1	0	0	3.84615	5.65732	C3
fatty acid metabolic process (GO:0006631)	1/106	0.233585	1	0	0	3.77358	5.48759	GPX1
positive regulation of cellular component organization (GO:0051130)	1/106	0.233585	1	0	0	3.77358	5.48759	GPX1
cellular macromolecule biosynthetic process (GO:0034645)	2/367	0.233587	1	0	0	2.17984	3.16992	RPS19;PTMA
regulation of protein secretion (GO:0050708)	1/107	0.235511	1	0	0	3.73832	5.4056	ANKRD1
viral life cycle (GO:0019058)	1/107	0.235511	1	0	0	3.73832	5.4056	CCL2
regulation of protein activation cascade (GO:2000257)	1/108	0.237432	1	0	0	3.7037	5.32545	C3
monocarboxylic acid metabolic process (GO:0032787)	1/108	0.237432	1	0	0	3.7037	5.32545	LDHB
negative regulation of hydrolase activity (GO:0051346)	1/108	0.237432	1	0	0	3.7037	5.32545	CSTB
circulatory system development (GO:0072359)	1/109	0.239349	1	0	0	3.66972	5.24709	CITED2
regulation of complement activation (GO:0030449)	1/109	0.239349	1	0	0	3.66972	5.24709	C3
Wnt signaling pathway (GO:0016055)	1/109	0.239349	1	0	0	3.66972	5.24709	CPE
negative regulation of protein kinase activity (GO:0006469)	1/109	0.239349	1	0	0	3.66972	5.24709	HSPB1
viral gene expression (GO:0019080)	1/110	0.241261	1	0	0	3.63636	5.17045	RPS19
nuclear-transcribed mRNA catabolic process, nonsense-mediated decay (GO:0000184)	1/112	0.245071	1	0	0	3.57143	5.02217	RPS19
viral transcription (GO:0019083)	1/113	0.246969	1	0	0	3.53982	4.95041	RPS19
regulation of humoral immune response (GO:0002920)	1/113	0.246969	1	0	0	3.53982	4.95041	C3
regulation of immune effector process (GO:0002697)	1/114	0.248862	1	0	0	3.50877	4.88019	C3
protein O-linked glycosylation (GO:0006493)	1/115	0.250751	1	0	0	3.47826	4.81146	ADAMTS5
plasma membrane bounded cell projection organization (GO:0120036)	1/118	0.256389	1	0	0	3.38983	4.61376	TPM1
regulation of phosphorylation (GO:0042325)	1/119	0.258259	1	0	0	3.36134	4.55056	HSPB1
positive regulation of B cell activation (GO:0050871)	1/119	0.258259	1	0	0	3.36134	4.55056	CD74
macromolecular complex assembly (GO:0065003)	1/120	0.260124	1	0	0	3.33333	4.48865	CD74
regulation of acute inflammatory response (GO:0002673)	1/121	0.261985	1	0	0	3.30579	4.42799	C3
stimulatory C-type lectin receptor signaling pathway (GO:0002223)	1/121	0.261985	1	0	0	3.30579	4.42799	NFKBIA
tumor necrosis factor-mediated signaling pathway (GO:0033209)	1/123	0.265693	1	0	0	3.25203	4.31029	NFKBIA
innate immune response activating cell surface receptor signaling pathway (GO:0002220)	1/124	0.26754	1	0	0	3.22581	4.25318	NFKBIA
organic anion transport (GO:0015711)	1/124	0.26754	1	0	0	3.22581	4.25318	SLC6A6
negative regulation of macromolecule metabolic process (GO:0010605)	1/124	0.26754	1	0	0	3.22581	4.25318	CITED2
negative regulation of multicellular organismal process (GO:0051241)	1/125	0.269383	1	0	0	3.2	4.19719	RPS19
G-protein coupled receptor signaling pathway, coupled to cyclic nucleotide second messenger (GO:0007187)	1/125	0.269383	1	0	0	3.2	4.19719	CCL2
G2/M transition of mitotic cell cycle (GO:0000086)	1/126	0.271221	1	0	0	3.1746	4.14229	NES
cell cycle G2/M phase transition (GO:0044839)	1/127	0.273054	1	0	0	3.14961	4.08845	NES
vesicle organization (GO:0016050)	1/127	0.273054	1	0	0	3.14961	4.08845	ANXA2
gene expression (GO:0010467)	2/411	0.274452	1	0	0	1.94647	2.51675	RPS19;PTMA
positive regulation of NF-kappaB transcription factor activity (GO:0051092)	1/128	0.274883	1	0	0	3.125	4.03565	NFKBIA
regulation of protein processing (GO:0070613)	1/128	0.274883	1	0	0	3.125	4.03565	C3
generation of neurons (GO:0048699)	1/130	0.278528	1	0	0	3.07692	3.93304	ID3
cellular response to organic substance (GO:0071310)	1/133	0.283961	1	0	0	3.00752	3.78622	CCL2
regulation of intracellular signal transduction (GO:1902531)	2/422	0.284683	1	0	0	1.89573	2.38176	AKAP12;HSPB1
adenylate cyclase-modulating G-protein coupled receptor signaling pathway (GO:0007188)	1/134	0.285763	1	0	0	2.98507	3.73908	AKAP12
cellular response to organic cyclic compound (GO:0071407)	1/135	0.287561	1	0	0	2.96296	3.6928	CCL2
phagocytosis (GO:0006909)	1/135	0.287561	1	0	0	2.96296	3.6928	C3
positive regulation of transferase activity (GO:0051347)	1/137	0.291143	1	0	0	2.91971	3.60275	CD74
regulation of primary metabolic process (GO:0080090)	1/139	0.294707	1	0	0	2.8777	3.5159	ANKRD1
neuron differentiation (GO:0030182)	1/139	0.294707	1	0	0	2.8777	3.5159	ID3
regulation of cellular component organization (GO:0051128)	1/140	0.296482	1	0	0	2.85714	3.47362	SPARC
positive regulation of gene expression (GO:0010628)	3/771	0.303244	1	0	0	1.55642	1.85715	CD74;CITED2;VIM
cellular protein complex assembly (GO:0043623)	1/144	0.303541	1	0	0	2.77778	3.31177	CYBA
negative regulation of nucleic acid-templated transcription (GO:1903507)	2/444	0.305111	1	0	0	1.8018	2.13888	CITED2;ID3
positive regulation of transcription, DNA-templated (GO:0045893)	4/1120	0.306621	1	0	0	1.42857	1.68877	NFKBIA;CD74;CITED2;CYR61
skeletal system development (GO:0001501)	1/146	0.307044	1	0	0	2.73973	3.23497	CD44
heart development (GO:0007507)	1/149	0.312267	1	0	0	2.68456	3.12456	CITED2
negative regulation of cell differentiation (GO:0045596)	1/150	0.313999	1	0	0	2.66667	3.08897	NFKBIA
nervous system development (GO:0007399)	2/455	0.315294	1	0	0	1.75824	2.02945	CXCL1;NES
ribonucleoprotein complex assembly (GO:0022618)	1/156	0.324303	1	0	0	2.5641	2.88738	RPS19
positive regulation of cellular biosynthetic process (GO:0031328)	1/159	0.329398	1	0	0	2.51572	2.79368	VIM
protein localization to membrane (GO:0072657)	1/160	0.331088	1	0	0	2.5	2.76343	CPE
neuron projection morphogenesis (GO:0048812)	1/163	0.336133	1	0	0	2.45399	2.67546	S100A6
T cell receptor signaling pathway (GO:0050852)	1/163	0.336133	1	0	0	2.45399	2.67546	NFKBIA
positive regulation of intracellular signal transduction (GO:1902533)	2/479	0.337403	1	0	0	1.67015	1.81457	CD74;LGALS1
regulation of inflammatory response (GO:0050727)	1/166	0.34114	1	0	0	2.40964	2.59147	NFKBIA
positive regulation of protein kinase activity (GO:0045860)	1/172	0.351044	1	0	0	2.32558	2.43452	CYR61
peptide biosynthetic process (GO:0043043)	1/174	0.354313	1	0	0	2.29885	2.38523	RPS19
nuclear-transcribed mRNA catabolic process (GO:0000956)	1/174	0.354313	1	0	0	2.29885	2.38523	RPS19
positive regulation of transcription from RNA polymerase II promoter (GO:0045944)	3/848	0.356461	1	0	0	1.41509	1.45971	NFKBIA;CITED2;CYR61
positive regulation of nucleic acid-templated transcription (GO:1903508)	2/502	0.358408	1	0	0	1.59363	1.63519	CD74;CITED2
negative regulation of protein phosphorylation (GO:0001933)	1/178	0.360803	1	0	0	2.24719	2.29084	HSPB1
positive regulation of cell motility (GO:2000147)	1/179	0.362415	1	0	0	2.23464	2.26808	CYR61
Fc-epsilon receptor signaling pathway (GO:0038095)	1/182	0.367228	1	0	0	2.1978	2.2017	NFKBIA
Fc receptor signaling pathway (GO:0038093)	1/183	0.368825	1	0	0	2.18579	2.18018	NFKBIA
positive regulation of cellular process (GO:0048522)	2/519	0.373791	1	0	0	1.54143	1.51685	RPS19;CITED2
receptor-mediated endocytosis (GO:0006898)	1/188	0.376748	1	0	0	2.12766	2.07698	SPARC
regulation of GTPase activity (GO:0043087)	1/188	0.376748	1	0	0	2.12766	2.07698	CCL2
positive regulation of GTPase activity (GO:0043547)	1/192	0.383016	1	0	0	2.08333	1.99933	CCL2
positive regulation of cell differentiation (GO:0045597)	1/194	0.386127	1	0	0	2.06186	1.96204	CYR61
rRNA metabolic process (GO:0016072)	1/200	0.395368	1	0	0	2	1.85588	RPS19
rRNA processing (GO:0006364)	1/202	0.398418	1	0	0	1.9802	1.82228	RPS19
positive regulation of multicellular organismal process (GO:0051240)	1/202	0.398418	1	0	0	1.9802	1.82228	RPS19
regulation of autophagy (GO:0010506)	1/203	0.399937	1	0	0	1.97044	1.80581	HSPB1
positive regulation of sequence-specific DNA binding transcription factor activity (GO:0051091)	1/215	0.417878	1	0	0	1.86047	1.62338	NFKBIA
protein oligomerization (GO:0051259)	1/217	0.420817	1	0	0	1.84332	1.5955	RPS19
positive regulation of cell migration (GO:0030335)	1/221	0.42665	1	0	0	1.80995	1.5417	CYR61
mitotic cell cycle phase transition (GO:0044772)	1/221	0.42665	1	0	0	1.80995	1.5417	NES
axonogenesis (GO:0007409)	1/223	0.429546	1	0	0	1.79372	1.51574	S100A6
ribosome biogenesis (GO:0042254)	1/226	0.433862	1	0	0	1.76991	1.47793	RPS19
ncRNA processing (GO:0034470)	1/227	0.435293	1	0	0	1.76211	1.46561	RPS19
apoptotic process (GO:0006915)	1/231	0.440984	1	0	0	1.7316	1.41774	NFKBIA
translation (GO:0006412)	1/232	0.442398	1	0	0	1.72414	1.40611	RPS19
defense response to bacterium (GO:0042742)	1/241	0.454966	1	0	0	1.65975	1.30711	RPS19
negative regulation of gene expression (GO:0010629)	2/618	0.460153	1	0	0	1.2945	1.00478	CITED2;ID3
antigen receptor-mediated signaling pathway (GO:0050851)	1/257	0.476627	1	0	0	1.55642	1.15334	NFKBIA
protein deubiquitination (GO:0016579)	1/257	0.476627	1	0	0	1.55642	1.15334	NFKBIA
positive regulation of programmed cell death (GO:0043068)	1/257	0.476627	1	0	0	1.55642	1.15334	ANKRD1
protein modification by small protein removal (GO:0070646)	1/261	0.481909	1	0	0	1.53257	1.11877	NFKBIA
endocytosis (GO:0006897)	1/263	0.484531	1	0	0	1.52091	1.10201	SPARC
MAPK cascade (GO:0000165)	1/278	0.503781	1	0	0	1.43885	0.986493	CCL2
regulation of transcription from RNA polymerase II promoter (GO:0006357)	4/1478	0.510548	1	0	0	1.08254	0.727762	NFKBIA;CITED2;ANKRD1;CYR61
positive regulation of apoptotic process (GO:0043065)	1/307	0.539023	1	0	0	1.30293	0.805209	ANKRD1
protein transport (GO:0015031)	1/326	0.560769	1	0	0	1.22699	0.70975	CD74
regulation of transcription, DNA-templated (GO:0006355)	4/1598	0.573918	1	0	0	1.00125	0.555964	CD74;CITED2;ANKRD1;ID3
intracellular protein transport (GO:0006886)	1/347	0.583636	1	0	0	1.15274	0.620724	CD74
transcription, DNA-templated (GO:0006351)	1/356	0.593075	1	0	0	1.1236	0.587005	PTMA
negative regulation of transcription, DNA-templated (GO:0045892)	2/813	0.60876	1	0	0	0.98401	0.488395	CITED2;ID3
phosphorylation (GO:0016310)	1/386	0.623049	1	0	0	1.03627	0.490291	CCL2
vesicle-mediated transport (GO:0016192)	1/410	0.64546	1	0	0	0.97561	0.427114	ANXA2
protein phosphorylation (GO:0006468)	1/470	0.695931	1	0	0	0.851064	0.308515	CCL2
regulation of gene expression (GO:0010468)	2/1037	0.739729	1	0	0	0.771456	0.232572	GPX1;CITED2
negative regulation of transcription from RNA polymerase II promoter (GO:0000122)	1/565	0.761793	1	0	0	0.707965	0.192623	CITED2

## Sheet: PT (IRI) vs Nephron (IRI)
Term	Overlap	P-value	Adjusted P-value	Old P-value	Old Adjusted P-value	Odds Ratio	Combined Score	Genes
glutathione metabolic process (GO:0006749)	8/49	1.11861e-10	5.70824e-07	0	0	32.6531	748.205	GPX1;GSTA2;GSTT2;GGT1;GCLM;CNDP2;SOD1;GSTM5
purine-containing compound metabolic process (GO:0072521)	5/17	1.66643e-08	4.2519e-05	0	0	58.8235	1053.53	SLC22A12;MT-RNR1;SLC17A1;SLC17A3;ABCG2
hydrogen peroxide metabolic process (GO:0042743)	5/20	4.12595e-08	7.01824e-05	0	0	50	850.169	GPX1;GPX3;CAT;CYBA;SOD1
urate transport (GO:0015747)	4/10	1.20722e-07	0.000154011	0	0	80	1274.38	SLC22A12;SLC22A6;SLC17A1;SLC17A3
urate metabolic process (GO:0046415)	4/11	1.88979e-07	0.000192872	0	0	72.7273	1125.94	SLC22A12;SLC17A1;SLC17A3;ABCG2
cellular response to oxidative stress (GO:0034599)	7/115	1.78037e-06	0.0015142	0	0	12.1739	161.167	GPX1;GPX3;CAT;HMOX1;NOX4;CYBA;SOD1
hexose metabolic process (GO:0019318)	5/45	2.94512e-06	0.00214699	0	0	22.2222	283.008	AKR1A1;SORD;ALDOB;PCK1;FBP1
fructose metabolic process (GO:0006000)	3/7	4.18353e-06	0.00266857	0	0	85.7143	1061.52	SORD;ALDOB;FBP1
cellular iron ion homeostasis (GO:0006879)	5/56	8.81608e-06	0.00499872	0	0	17.8571	207.838	MT-RNR2;FTH1;HMOX1;ABCG2;SOD1
anion transport (GO:0006820)	5/56	8.81608e-06	0.00449884	0	0	17.8571	207.838	SLC22A12;SLC13A1;SLC22A6;SLC17A1;SLC17A3
sodium ion transport (GO:0006814)	5/58	1.04922e-05	0.00486743	0	0	17.2414	197.67	SLC13A1;SLC5A2;SLC17A1;SLC4A4;SLC17A3
peptide metabolic process (GO:0006518)	6/104	1.37197e-05	0.00583429	0	0	11.5385	129.192	HSPA8;GPX1;GSTA2;GSTT2;GSTM5;SOD1
iron ion homeostasis (GO:0055072)	5/63	1.578e-05	0.00619426	0	0	15.873	175.504	MT-RNR2;FTH1;HMOX1;ABCG2;SOD1
glucose metabolic process (GO:0006006)	5/64	1.70498e-05	0.00621467	0	0	15.625	171.553	AKR1A1;SORD;ALDOB;PCK1;FBP1
glutathione biosynthetic process (GO:0006750)	3/11	1.94376e-05	0.00661266	0	0	54.5455	591.726	GCLM;GGT1;CNDP2
nonribosomal peptide biosynthetic process (GO:0019184)	3/12	2.58227e-05	0.00823583	0	0	50	528.213	GCLM;GGT1;CNDP2
phosphate ion transport (GO:0006817)	3/13	3.34477e-05	0.0100402	0	0	46.1538	475.64	SLC34A1;SLC17A1;SLC17A3
sulfur compound biosynthetic process (GO:0044272)	6/122	3.39975e-05	0.0096383	0	0	9.83607	101.205	GSTA2;AKR1A1;GGT1;GCLM;CNDP2;GSTM5
nitrogen compound transport (GO:0071705)	5/74	3.46279e-05	0.00930031	0	0	13.5135	138.795	SLC22A12;SLC22A6;TCN2;SLC17A1;SLC17A3
hydrogen peroxide catabolic process (GO:0042744)	3/14	4.24153e-05	0.0108223	0	0	42.8571	431.486	GPX1;GPX3;CAT
response to hydrogen peroxide (GO:0042542)	4/43	6.25094e-05	0.0151898	0	0	18.6047	180.097	GPX1;CAT;HMOX1;SOD1
hexose biosynthetic process (GO:0019319)	4/44	6.84976e-05	0.0158883	0	0	18.1818	174.34	SORD;ALDOB;PCK1;FBP1
inorganic anion transport (GO:0015698)	4/44	6.84976e-05	0.0151975	0	0	18.1818	174.34	SLC13A1;SLC34A1;SLC17A1;SLC17A3
organic substance transport (GO:0071702)	5/87	7.54584e-05	0.0160443	0	0	11.4943	109.103	SLC22A12;SLC22A6;SLC47A1;TCN2;SLC17A3
cellular transition metal ion homeostasis (GO:0046916)	5/93	0.000103654	0.0211579	0	0	10.7527	98.65	MT-RNR2;FTH1;HMOX1;ABCG2;SOD1
drug transport (GO:0015893)	3/19	0.000110881	0.0217625	0	0	31.5789	287.591	SLC47A1;PDZK1;SLC17A3
epithelial cell differentiation (GO:0030855)	5/96	0.000120477	0.0227701	0	0	10.4167	94.0006	DAB2;MAF;PTER;GSTA2;PCK1
metal ion transport (GO:0030001)	5/101	0.000153078	0.0278984	0	0	9.90099	86.9759	KCNJ15;LRP2;SLC5A2;SLC4A4;SLC17A3
glutathione derivative biosynthetic process (GO:1901687)	3/22	0.00017431	0.0306725	0	0	27.2727	236.037	GSTA2;AKR1A1;GSTM5
glutathione derivative metabolic process (GO:1901685)	3/22	0.00017431	0.0296501	0	0	27.2727	236.037	GSTA2;AKR1A1;GSTM5
protein homotetramerization (GO:0051289)	4/57	0.000189645	0.031218	0	0	14.0351	120.286	CDA;GPX3;CAT;FBP1
dicarboxylic acid metabolic process (GO:0043648)	4/59	0.000216843	0.0345796	0	0	13.5593	114.391	IDH1;GGT1;GCLM;ASS1
cellular modified amino acid biosynthetic process (GO:0042398)	3/24	0.000227436	0.0351699	0	0	25	209.716	GCLM;GGT1;CNDP2
response to reactive oxygen species (GO:0000302)	4/60	0.000231445	0.0347372	0	0	13.3333	111.616	GPX1;CAT;HMOX1;SOD1
organonitrogen compound biosynthetic process (GO:1901566)	6/181	0.000298167	0.0434728	0	0	6.62983	53.82	MT-RNR1;GSTA2;AKR1A1;CHPT1;ASS1;GSTM5
organic anion transport (GO:0015711)	5/124	0.000397478	0.0563425	0	0	8.06452	63.1482	SLC22A12;SLC22A6;SLC17A1;SLC4A4;SLC17A3
superoxide metabolic process (GO:0006801)	3/29	0.000403221	0.0556118	0	0	20.6897	161.711	NOX4;CYBA;SOD1
fructose 1,6-bisphosphate metabolic process (GO:0030388)	2/7	0.000511333	0.0686666	0	0	57.1429	433.057	ALDOB;FBP1
negative regulation of apoptotic process (GO:0043066)	9/485	0.000727285	0.0951624	0	0	3.71134	26.8189	HSPA9;DAB2;GPX1;MT-RNR2;CAT;SQSTM1;LGMN;HSPD1;SOD1
sodium ion transmembrane transport (GO:0035725)	3/36	0.000768177	0.0980002	0	0	16.6667	119.525	SLC13A1;SLC17A1;SLC17A3
L-ascorbic acid metabolic process (GO:0019852)	2/9	0.000870867	0.108391	0	0	44.4444	313.156	CYB5A;AKR1A1
protein tetramerization (GO:0051262)	4/90	0.00108165	0.13142	0	0	8.88889	60.7046	CDA;GPX3;CAT;FBP1
superoxide anion generation (GO:0042554)	2/10	0.00108504	0.128766	0	0	40	273.046	NOX4;CYBA
UV protection (GO:0009650)	2/10	0.00108504	0.12584	0	0	40	273.046	GPX1;CAT
gluconeogenesis (GO:0006094)	3/41	0.00112633	0.127726	0	0	14.6341	99.3482	ALDOB;PCK1;FBP1
response to unfolded protein (GO:0006986)	3/43	0.00129455	0.14361	0	0	13.9535	92.785	HSPA9;HSPA8;HSPD1
heart process (GO:0003015)	2/11	0.00132184	0.143518	0	0	36.3636	241.045	GPX1;SOD1
interleukin-12-mediated signaling pathway (GO:0035722)	3/46	0.00157519	0.167462	0	0	13.0435	84.1745	HSPA9;GSTA2;SOD1
cellular response to interleukin-12 (GO:0071349)	3/46	0.00157519	0.164044	0	0	13.0435	84.1745	HSPA9;GSTA2;SOD1
cellular response to heat (GO:0034605)	3/47	0.00167652	0.171106	0	0	12.766	81.5877	HSPA9;HSPA8;HMOX1
monovalent inorganic cation transport (GO:0015672)	4/104	0.00184554	0.184662	0	0	7.69231	48.423	KCNJ15;SLC5A2;SLC4A4;SLC17A3
tricarboxylic acid metabolic process (GO:0072350)	2/13	0.00186243	0.182769	0	0	30.7692	193.412	IDH1;ASS1
fatty acid metabolic process (GO:0006631)	4/106	0.00197878	0.190523	0	0	7.54717	46.9832	GPX1;ACOX1;GGT1;SLC27A2
blood circulation (GO:0008015)	3/50	0.00200468	0.189442	0	0	12	74.5473	GPX1;GCLM;SOD1
vitamin D metabolic process (GO:0042359)	2/15	0.00249083	0.231104	0	0	26.6667	159.87	LRP2;LGMN
protein homooligomerization (GO:0051260)	5/190	0.0026672	0.243049	0	0	5.26316	31.1933	CDA;GPX3;CAT;HMOX1;FBP1
neutrophil activation involved in immune response (GO:0002283)	8/483	0.00292118	0.261523	0	0	3.31263	19.3317	CDA;HSPA8;FTH1;IDH1;CAT;CYBA;DNASE1;SLC27A2
glyceraldehyde-3-phosphate metabolic process (GO:0019682)	2/18	0.00359424	0.316231	0	0	22.2222	125.076	ALDOB;KHK
triglyceride biosynthetic process (GO:0019432)	2/19	0.00400405	0.346316	0	0	21.0526	116.22	GK;PCK1
glutamate metabolic process (GO:0006536)	2/21	0.00488539	0.415502	0	0	19.0476	101.362	GCLM;GGT1
cellular response to unfolded protein (GO:0034620)	2/22	0.0053565	0.448102	0	0	18.1818	95.0808	HSPA9;HSPA8
glutamine family amino acid metabolic process (GO:0009064)	2/23	0.00584762	0.481297	0	0	17.3913	89.4212	GCLM;GGT1
chaperone mediated protein folding requiring cofactor (GO:0051085)	2/24	0.00635855	0.515042	0	0	16.6667	84.2993	HSPA9;HSPA8
regulation of supramolecular fiber organization (GO:1902903)	2/26	0.00743899	0.593144	0	0	15.3846	75.4003	HSPA8;GPX1
fat-soluble vitamin metabolic process (GO:0006775)	2/26	0.00743899	0.584018	0	0	15.3846	75.4003	LRP2;LGMN
cellular response to topologically incorrect protein (GO:0035967)	2/27	0.00800811	0.619172	0	0	14.8148	71.5156	HSPA9;HSPA8
'de novo' posttranslational protein folding (GO:0051084)	2/30	0.00982858	0.748586	0	0	13.3333	61.6328	HSPA9;HSPA8
positive regulation of reactive oxygen species biosynthetic process (GO:1903428)	2/30	0.00982858	0.737577	0	0	13.3333	61.6328	CYBA;ASS1
neutrophil degranulation (GO:0043312)	7/479	0.010251	0.758127	0	0	2.92276	13.3873	CDA;HSPA8;FTH1;IDH1;CAT;CYBA;SLC27A2
negative regulation of extrinsic apoptotic signaling pathway via death domain receptors (GO:1902042)	2/31	0.0104725	0.763442	0	0	12.9032	58.8259	GPX1;HMOX1
alpha-amino acid metabolic process (GO:1901605)	2/31	0.0104725	0.752689	0	0	12.9032	58.8259	NOX4;ASS1
neutrophil mediated immunity (GO:0002446)	7/487	0.011156	0.790684	0	0	2.87474	12.9242	CDA;HSPA8;FTH1;IDH1;CAT;CYBA;SLC27A2
transmembrane transport (GO:0055085)	6/378	0.011801	0.824939	0	0	3.1746	14.0939	SLC22A12;SLC22A6;ABCC2;SLC47A1;SLC17A3;ABCG2
carboxylic acid metabolic process (GO:0019752)	2/33	0.0118146	0.814728	0	0	12.1212	53.799	CYB5A;GLYAT
macromolecule catabolic process (GO:0009057)	2/34	0.0125125	0.851349	0	0	11.7647	51.5415	NAPSA;LGMN
steroid metabolic process (GO:0008202)	3/99	0.013455	0.903435	0	0	6.06061	26.1115	CYP2E1;LRP2;LGMN
phosphate-containing compound metabolic process (GO:0006796)	4/183	0.0134645	0.892328	0	0	4.37158	18.8315	MIOX;GK;ALDOB;FBP1
sodium-independent organic anion transport (GO:0043252)	2/37	0.0147111	0.962445	0	0	10.8108	45.6125	SLC22A12;SLC22A6
positive regulation of reactive oxygen species metabolic process (GO:2000379)	2/39	0.0162624	1	0	0	10.2564	42.2451	CYBA;SOD1
regulation of extrinsic apoptotic signaling pathway via death domain receptors (GO:1902041)	2/39	0.0162624	1	0	0	10.2564	42.2451	GPX1;HMOX1
acyl-CoA metabolic process (GO:0006637)	2/39	0.0162624	1	0	0	10.2564	42.2451	DBI;GLYAT
negative regulation of programmed cell death (GO:0043069)	6/408	0.0166256	1	0	0	2.94118	12.0495	HSPA9;DAB2;MT-RNR2;CAT;SQSTM1;HSPD1
monocarboxylic acid metabolic process (GO:0032787)	3/108	0.0169601	1	0	0	5.55556	22.6494	GLYAT;GGT1;PCK1
regulation of cell growth (GO:0001558)	4/201	0.0183714	1	0	0	3.9801	15.9083	CDA;OSGIN1;CHPT1;FBP1
regulation of interleukin-6 production (GO:0032675)	2/42	0.0187141	1	0	0	9.52381	37.8903	CYBA;HSPD1
positive regulation of interleukin-6 production (GO:0032755)	2/43	0.0195638	1	0	0	9.30233	36.596	CYBA;HSPD1
negative regulation of cell growth (GO:0030308)	3/115	0.0200067	1	0	0	5.21739	20.4088	CDA;OSGIN1;FBP1
heart contraction (GO:0060047)	2/44	0.0204295	1	0	0	9.09091	35.3707	GPX1;SOD1
icosanoid metabolic process (GO:0006690)	2/46	0.022208	1	0	0	8.69565	33.107	GPX1;GGT1
pyruvate metabolic process (GO:0006090)	2/46	0.022208	1	0	0	8.69565	33.107	ALDOB;PCK1
negative regulation of growth (GO:0045926)	3/120	0.0223556	1	0	0	5	19.0034	CDA;OSGIN1;FBP1
platelet degranulation (GO:0002576)	3/124	0.0243386	1	0	0	4.83871	17.9792	SELENOP;TIMP3;SOD1
regulation of ion transport (GO:0043269)	2/50	0.025949	1	0	0	8	29.213	KCNJ15;PDZK1
fatty acid oxidation (GO:0019395)	2/50	0.025949	1	0	0	8	29.213	ACOX1;SLC27A2
fatty acid beta-oxidation (GO:0006635)	2/50	0.025949	1	0	0	8	29.213	ACOX1;SLC27A2
coenzyme metabolic process (GO:0006732)	2/51	0.0269215	1	0	0	7.84314	28.3516	DBI;GLYAT
positive regulation of vesicle fusion (GO:0031340)	1/6	0.029631	1	0	0	33.3333	117.298	TMEM27
response to lead ion (GO:0010288)	1/6	0.029631	1	0	0	33.3333	117.298	SLC34A1
pyrimidine-containing compound biosynthetic process (GO:0072528)	1/6	0.029631	1	0	0	33.3333	117.298	CDA
negative regulation of coenzyme metabolic process (GO:0051198)	1/6	0.029631	1	0	0	33.3333	117.298	FBP1
positive regulation of oxidative stress-induced cell death (GO:1903209)	1/6	0.029631	1	0	0	33.3333	117.298	SOD1
arginine biosynthetic process (GO:0006526)	1/6	0.029631	1	0	0	33.3333	117.298	ASS1
surfactant homeostasis (GO:0043129)	1/6	0.029631	1	0	0	33.3333	117.298	NAPSA
regulation of lysosomal protein catabolic process (GO:1905165)	1/6	0.029631	1	0	0	33.3333	117.298	LRP2
citrulline metabolic process (GO:0000052)	1/6	0.029631	1	0	0	33.3333	117.298	ASS1
negative regulation of erythrocyte differentiation (GO:0045647)	1/6	0.029631	1	0	0	33.3333	117.298	HSPA9
monoterpenoid metabolic process (GO:0016098)	1/6	0.029631	1	0	0	33.3333	117.298	CYP2E1
aldehyde catabolic process (GO:0046185)	1/6	0.029631	1	0	0	33.3333	117.298	AKR1A1
ventricular compact myocardium morphogenesis (GO:0003223)	1/6	0.029631	1	0	0	33.3333	117.298	LRP2
negative regulation of glycolytic process (GO:0045820)	1/6	0.029631	1	0	0	33.3333	117.298	FBP1
amine metabolic process (GO:0009308)	1/6	0.029631	1	0	0	33.3333	117.298	INMT
aggrephagy (GO:0035973)	1/6	0.029631	1	0	0	33.3333	117.298	SQSTM1
chemical homeostasis within a tissue (GO:0048875)	1/6	0.029631	1	0	0	33.3333	117.298	NAPSA
positive regulation of extrinsic apoptotic signaling pathway via death domain receptors (GO:1902043)	1/6	0.029631	1	0	0	33.3333	117.298	TIMP3
positive regulation of clathrin-dependent endocytosis (GO:2000370)	1/6	0.029631	1	0	0	33.3333	117.298	DAB2
cellular response to magnesium ion (GO:0071286)	1/6	0.029631	1	0	0	33.3333	117.298	FBP1
fructose 6-phosphate metabolic process (GO:0006002)	1/6	0.029631	1	0	0	33.3333	117.298	FBP1
long-chain fatty acid metabolic process (GO:0001676)	2/55	0.0309557	1	0	0	7.27273	25.2742	ACOX1;SLC27A2
organonitrogen compound catabolic process (GO:1901565)	2/56	0.0319994	1	0	0	7.14286	24.586	RIDA;NAPSA
inorganic cation transmembrane transport (GO:0098662)	3/140	0.033191	1	0	0	4.28571	14.5949	SLC13A1;SLC17A1;SLC17A3
positive regulation of blood vessel endothelial cell proliferation involved in sprouting angiogenesis (GO:1903589)	1/7	0.0344842	1	0	0	28.5714	96.2072	HMOX1
inner ear receptor stereocilium organization (GO:0060122)	1/7	0.0344842	1	0	0	28.5714	96.2072	SOD1
alditol metabolic process (GO:0019400)	1/7	0.0344842	1	0	0	28.5714	96.2072	GK
cellular divalent inorganic anion homeostasis (GO:0072501)	1/7	0.0344842	1	0	0	28.5714	96.2072	SLC34A1
negative regulation of membrane protein ectodomain proteolysis (GO:0051045)	1/7	0.0344842	1	0	0	28.5714	96.2072	TIMP3
terpenoid metabolic process (GO:0006721)	1/7	0.0344842	1	0	0	28.5714	96.2072	CYP2E1
regulation of chemokine biosynthetic process (GO:0045073)	1/7	0.0344842	1	0	0	28.5714	96.2072	HMOX1
lens fiber cell differentiation (GO:0070306)	1/7	0.0344842	1	0	0	28.5714	96.2072	MAF
negative regulation of leukocyte migration (GO:0002686)	1/7	0.0344842	1	0	0	28.5714	96.2072	HMOX1
cellular trivalent inorganic anion homeostasis (GO:0072502)	1/7	0.0344842	1	0	0	28.5714	96.2072	SLC34A1
carnitine transport (GO:0015879)	1/7	0.0344842	1	0	0	28.5714	96.2072	PDZK1
amino-acid betaine transport (GO:0015838)	1/7	0.0344842	1	0	0	28.5714	96.2072	PDZK1
regulation of Wnt signaling pathway, planar cell polarity pathway (GO:2000095)	1/7	0.0344842	1	0	0	28.5714	96.2072	DAB2
sulfur amino acid biosynthetic process (GO:0000097)	1/7	0.0344842	1	0	0	28.5714	96.2072	GGT1
cellular response to laminar fluid shear stress (GO:0071499)	1/7	0.0344842	1	0	0	28.5714	96.2072	ASS1
female genitalia development (GO:0030540)	1/7	0.0344842	1	0	0	28.5714	96.2072	LRP2
heme catabolic process (GO:0042167)	1/7	0.0344842	1	0	0	28.5714	96.2072	HMOX1
folic acid transport (GO:0015884)	1/7	0.0344842	1	0	0	28.5714	96.2072	LRP2
long-chain fatty acid import (GO:0044539)	1/7	0.0344842	1	0	0	28.5714	96.2072	SLC27A2
cellular phosphate ion homeostasis (GO:0030643)	1/7	0.0344842	1	0	0	28.5714	96.2072	SLC34A1
retrograde axonal transport (GO:0008090)	1/7	0.0344842	1	0	0	28.5714	96.2072	SOD1
porphyrin-containing compound catabolic process (GO:0006787)	1/7	0.0344842	1	0	0	28.5714	96.2072	HMOX1
regulation of anion transport (GO:0044070)	1/7	0.0344842	1	0	0	28.5714	96.2072	PDZK1
regulated exocytosis (GO:0045055)	3/148	0.0381646	1	0	0	4.05405	13.2399	SELENOP;TIMP3;SOD1
fatty acid alpha-oxidation (GO:0001561)	1/8	0.0393135	1	0	0	25	80.9047	SLC27A2
positive regulation of spindle checkpoint (GO:0090232)	1/8	0.0393135	1	0	0	25	80.9047	NDRG1
regulation of transcription from RNA polymerase II promoter in response to oxidative stress (GO:0043619)	1/8	0.0393135	1	0	0	25	80.9047	HMOX1
myelin maintenance (GO:0043217)	1/8	0.0393135	1	0	0	25	80.9047	SOD1
regulation of toll-like receptor 2 signaling pathway (GO:0034135)	1/8	0.0393135	1	0	0	25	80.9047	CYBA
response to magnesium ion (GO:0032026)	1/8	0.0393135	1	0	0	25	80.9047	FBP1
glycerol-3-phosphate metabolic process (GO:0006072)	1/8	0.0393135	1	0	0	25	80.9047	GK
pyrimidine nucleobase metabolic process (GO:0006206)	1/8	0.0393135	1	0	0	25	80.9047	CDA
response to hydroperoxide (GO:0033194)	1/8	0.0393135	1	0	0	25	80.9047	GPX3
coronary vasculature morphogenesis (GO:0060977)	1/8	0.0393135	1	0	0	25	80.9047	LRP2
short-chain fatty acid catabolic process (GO:0019626)	1/8	0.0393135	1	0	0	25	80.9047	PCK1
positive regulation of non-canonical Wnt signaling pathway (GO:2000052)	1/8	0.0393135	1	0	0	25	80.9047	DAB2
cellular monovalent inorganic anion homeostasis (GO:0030320)	1/8	0.0393135	1	0	0	25	80.9047	SLC34A1
benzene-containing compound metabolic process (GO:0042537)	1/8	0.0393135	1	0	0	25	80.9047	CYP2E1
positive regulation of early endosome to late endosome transport (GO:2000643)	1/8	0.0393135	1	0	0	25	80.9047	DAB2
B cell mediated immunity (GO:0019724)	1/8	0.0393135	1	0	0	25	80.9047	HSPD1
negative regulation of neuron apoptotic process (GO:0043524)	2/63	0.0396819	1	0	0	6.34921	20.488	SOD1;LGMN
cellular response to decreased oxygen levels (GO:0036294)	2/64	0.0408313	1	0	0	6.25	19.9894	HMOX1;NDRG1
positive regulation of endocytosis (GO:0045807)	2/64	0.0408313	1	0	0	6.25	19.9894	DAB2;CYBA
inositol metabolic process (GO:0006020)	1/9	0.0441188	1	0	0	22.2222	69.3526	MIOX
negative regulation of serine-type endopeptidase activity (GO:1900004)	1/9	0.0441188	1	0	0	22.2222	69.3526	SPINK1
removal of superoxide radicals (GO:0019430)	1/9	0.0441188	1	0	0	22.2222	69.3526	SOD1
vacuolar proton-transporting V-type ATPase complex assembly (GO:0070072)	1/9	0.0441188	1	0	0	22.2222	69.3526	ALDOB
L-fucose metabolic process (GO:0042354)	1/9	0.0441188	1	0	0	22.2222	69.3526	FUT9
negative regulation of alcohol biosynthetic process (GO:1902931)	1/9	0.0441188	1	0	0	22.2222	69.3526	SOD1
regulation of organ growth (GO:0046620)	1/9	0.0441188	1	0	0	22.2222	69.3526	SOD1
cellular response to superoxide (GO:0071451)	1/9	0.0441188	1	0	0	22.2222	69.3526	SOD1
regulation of SNARE complex assembly (GO:0035542)	1/9	0.0441188	1	0	0	22.2222	69.3526	TMEM27
negative regulation of serine-type peptidase activity (GO:1902572)	1/9	0.0441188	1	0	0	22.2222	69.3526	SPINK1
vasodilation (GO:0042311)	1/9	0.0441188	1	0	0	22.2222	69.3526	SOD1
fucose catabolic process (GO:0019317)	1/9	0.0441188	1	0	0	22.2222	69.3526	FUT9
proton-transporting V-type ATPase complex assembly (GO:0070070)	1/9	0.0441188	1	0	0	22.2222	69.3526	ALDOB
homocysteine metabolic process (GO:0050667)	1/9	0.0441188	1	0	0	22.2222	69.3526	NOX4
regulation of leukocyte mediated cytotoxicity (GO:0001910)	1/9	0.0441188	1	0	0	22.2222	69.3526	DNASE1
L-fucose catabolic process (GO:0042355)	1/9	0.0441188	1	0	0	22.2222	69.3526	FUT9
positive regulation of long-term synaptic potentiation (GO:1900273)	1/9	0.0441188	1	0	0	22.2222	69.3526	SQSTM1
positive regulation of ion transmembrane transport (GO:0034767)	1/9	0.0441188	1	0	0	22.2222	69.3526	PDZK1
vitamin transmembrane transport (GO:0035461)	1/9	0.0441188	1	0	0	22.2222	69.3526	LRP2
regulation of protein localization to plasma membrane (GO:1903076)	2/67	0.0443538	1	0	0	5.97015	18.6003	DAB2;SQSTM1
chaperone-mediated protein transport (GO:0072321)	1/10	0.0489004	1	0	0	20	60.3594	HSPA8
cytochrome complex assembly (GO:0017004)	1/10	0.0489004	1	0	0	20	60.3594	CYBA
positive regulation of cytoplasmic transport (GO:1903651)	1/10	0.0489004	1	0	0	20	60.3594	DAB2
regulation of mammary gland epithelial cell proliferation (GO:0033599)	1/10	0.0489004	1	0	0	20	60.3594	GPX1
leukotriene D4 biosynthetic process (GO:1901750)	1/10	0.0489004	1	0	0	20	60.3594	GGT1
leukotriene D4 metabolic process (GO:1901748)	1/10	0.0489004	1	0	0	20	60.3594	GGT1
glycine metabolic process (GO:0006544)	1/10	0.0489004	1	0	0	20	60.3594	GLYAT
positive regulation of insulin secretion involved in cellular response to glucose stimulus (GO:0035774)	1/10	0.0489004	1	0	0	20	60.3594	TMEM27
response to laminar fluid shear stress (GO:0034616)	1/10	0.0489004	1	0	0	20	60.3594	ASS1
aspartate family amino acid metabolic process (GO:0009066)	1/10	0.0489004	1	0	0	20	60.3594	ASS1
RNA phosphodiester bond hydrolysis, endonucleolytic (GO:0090502)	1/10	0.0489004	1	0	0	20	60.3594	LACTB2
phosphatidylcholine metabolic process (GO:0046470)	2/71	0.0492185	1	0	0	5.6338	16.9661	DBI;CHPT1
response to metal ion (GO:0010038)	2/72	0.0504638	1	0	0	5.55556	16.5917	SLC34A1;NDRG1
regulation of apoptotic process (GO:0042981)	8/815	0.0514684	1	0	0	1.96319	5.82437	HSPA9;DAB2;MT-RNR2;CAT;SQSTM1;NDRG1;HSPD1;SOD1
isotype switching (GO:0045190)	1/11	0.0536583	1	0	0	18.1818	53.184	HSPD1
regulation of serine-type endopeptidase activity (GO:1900003)	1/11	0.0536583	1	0	0	18.1818	53.184	SPINK1
regulation of myeloid leukocyte mediated immunity (GO:0002886)	1/11	0.0536583	1	0	0	18.1818	53.184	DNASE1
drug transmembrane transport (GO:0006855)	1/11	0.0536583	1	0	0	18.1818	53.184	SLC47A1
phosphate ion homeostasis (GO:0055062)	1/11	0.0536583	1	0	0	18.1818	53.184	SLC34A1
arginine metabolic process (GO:0006525)	1/11	0.0536583	1	0	0	18.1818	53.184	ASS1
response to axon injury (GO:0048678)	1/11	0.0536583	1	0	0	18.1818	53.184	SOD1
import across plasma membrane (GO:0098739)	1/11	0.0536583	1	0	0	18.1818	53.184	LRP2
regulation of leukocyte cell-cell adhesion (GO:1903037)	1/11	0.0536583	1	0	0	18.1818	53.184	ASS1
positive regulation of superoxide anion generation (GO:0032930)	1/11	0.0536583	1	0	0	18.1818	53.184	SOD1
negative regulation of leukocyte cell-cell adhesion (GO:1903038)	1/11	0.0536583	1	0	0	18.1818	53.184	ASS1
glycerol metabolic process (GO:0006071)	1/11	0.0536583	1	0	0	18.1818	53.184	GK
regulation of blood vessel endothelial cell proliferation involved in sprouting angiogenesis (GO:1903587)	1/11	0.0536583	1	0	0	18.1818	53.184	HMOX1
urea cycle (GO:0000050)	1/11	0.0536583	1	0	0	18.1818	53.184	ASS1
myeloid cell activation involved in immune response (GO:0002275)	1/11	0.0536583	1	0	0	18.1818	53.184	DNASE1
internal protein amino acid acetylation (GO:0006475)	1/11	0.0536583	1	0	0	18.1818	53.184	PCK1
negative regulation of extrinsic apoptotic signaling pathway (GO:2001237)	2/76	0.0555566	1	0	0	5.26316	15.2124	GPX1;HMOX1
water-soluble vitamin metabolic process (GO:0006767)	2/77	0.0568571	1	0	0	5.19481	14.8946	CYB5A;TCN2
sensory perception of mechanical stimulus (GO:0050954)	2/78	0.0581682	1	0	0	5.12821	14.5868	LRP2;SOD1
cellular response to fluid shear stress (GO:0071498)	1/12	0.0583926	1	0	0	16.6667	47.3428	ASS1
pyrimidine-containing compound salvage (GO:0008655)	1/12	0.0583926	1	0	0	16.6667	47.3428	CDA
prostanoid metabolic process (GO:0006692)	1/12	0.0583926	1	0	0	16.6667	47.3428	ACOX1
regulation of T cell differentiation in thymus (GO:0033081)	1/12	0.0583926	1	0	0	16.6667	47.3428	SOD1
pyrimidine nucleoside salvage (GO:0043097)	1/12	0.0583926	1	0	0	16.6667	47.3428	CDA
cellular modified amino acid catabolic process (GO:0042219)	1/12	0.0583926	1	0	0	16.6667	47.3428	GGT1
negative regulation of androgen receptor signaling pathway (GO:0060766)	1/12	0.0583926	1	0	0	16.6667	47.3428	DAB2
negative regulation of ATP metabolic process (GO:1903579)	1/12	0.0583926	1	0	0	16.6667	47.3428	FBP1
serine family amino acid biosynthetic process (GO:0009070)	1/12	0.0583926	1	0	0	16.6667	47.3428	GGT1
aromatic compound biosynthetic process (GO:0019438)	1/12	0.0583926	1	0	0	16.6667	47.3428	MT-RNR1
regulation of blood vessel size (GO:0050880)	1/12	0.0583926	1	0	0	16.6667	47.3428	GCLM
positive regulation of SMAD protein import into nucleus (GO:0060391)	1/12	0.0583926	1	0	0	16.6667	47.3428	DAB2
cation transport (GO:0006812)	2/79	0.0594898	1	0	0	5.06329	14.2884	SLC47A1;LRP2
sensory perception of sound (GO:0007605)	2/81	0.0621639	1	0	0	4.93827	13.7184	LRP2;SOD1
protein catabolic process (GO:0030163)	2/81	0.0621639	1	0	0	4.93827	13.7184	HSPA8;NAPSA
glutamine family amino acid biosynthetic process (GO:0009084)	1/13	0.0631034	1	0	0	15.3846	42.5074	ASS1
alpha-linolenic acid metabolic process (GO:0036109)	1/13	0.0631034	1	0	0	15.3846	42.5074	ACOX1
regulation of superoxide anion generation (GO:0032928)	1/13	0.0631034	1	0	0	15.3846	42.5074	SOD1
regulation of leukocyte migration (GO:0002685)	1/13	0.0631034	1	0	0	15.3846	42.5074	HMOX1
secretion (GO:0046903)	1/13	0.0631034	1	0	0	15.3846	42.5074	SLC22A6
myelination in peripheral nervous system (GO:0022011)	1/13	0.0631034	1	0	0	15.3846	42.5074	SOD1
placenta development (GO:0001890)	1/13	0.0631034	1	0	0	15.3846	42.5074	SOD1
negative regulation of endopeptidase activity (GO:0010951)	2/83	0.0648784	1	0	0	4.81928	13.1819	SPINK1;TIMP3
negative regulation of neuron death (GO:1901215)	2/83	0.0648784	1	0	0	4.81928	13.1819	SOD1;LGMN
nucleoside salvage (GO:0043174)	1/14	0.0677909	1	0	0	14.2857	38.4475	CDA
monosaccharide transport (GO:0015749)	1/14	0.0677909	1	0	0	14.2857	38.4475	SLC5A2
neutrophil activation (GO:0042119)	1/14	0.0677909	1	0	0	14.2857	38.4475	DNASE1
metallo-sulfur cluster assembly (GO:0031163)	1/14	0.0677909	1	0	0	14.2857	38.4475	HSPA9
positive regulation of neural precursor cell proliferation (GO:2000179)	1/14	0.0677909	1	0	0	14.2857	38.4475	LRP2
thymus development (GO:0048538)	1/14	0.0677909	1	0	0	14.2857	38.4475	SOD1
positive regulation of calcium ion-dependent exocytosis (GO:0045956)	1/14	0.0677909	1	0	0	14.2857	38.4475	TMEM27
positive regulation of transporter activity (GO:0032411)	1/14	0.0677909	1	0	0	14.2857	38.4475	PDZK1
response to ethanol (GO:0045471)	1/14	0.0677909	1	0	0	14.2857	38.4475	SOD1
purine-containing compound catabolic process (GO:0072523)	1/14	0.0677909	1	0	0	14.2857	38.4475	GPX1
positive regulation of blood vessel diameter (GO:0097755)	1/14	0.0677909	1	0	0	14.2857	38.4475	HMOX1
purine nucleotide catabolic process (GO:0006195)	1/14	0.0677909	1	0	0	14.2857	38.4475	GPX1
toll-like receptor signaling pathway (GO:0002224)	2/86	0.0690235	1	0	0	4.65116	12.434	HSPD1;LGMN
fatty acid beta-oxidation using acyl-CoA oxidase (GO:0033540)	1/15	0.0724552	1	0	0	13.3333	34.9972	ACOX1
regulation of fertilization (GO:0080154)	1/15	0.0724552	1	0	0	13.3333	34.9972	SPINK1
selective autophagy (GO:0061912)	1/15	0.0724552	1	0	0	13.3333	34.9972	SQSTM1
regulation of clathrin-dependent endocytosis (GO:2000369)	1/15	0.0724552	1	0	0	13.3333	34.9972	DAB2
sulfate transport (GO:0008272)	1/15	0.0724552	1	0	0	13.3333	34.9972	SLC13A1
pyrimidine nucleoside biosynthetic process (GO:0046134)	1/15	0.0724552	1	0	0	13.3333	34.9972	CDA
transport along microtubule (GO:0010970)	1/15	0.0724552	1	0	0	13.3333	34.9972	HSPA8
negative regulation of release of cytochrome c from mitochondria (GO:0090201)	1/15	0.0724552	1	0	0	13.3333	34.9972	GPX1
lipoxygenase pathway (GO:0019372)	1/15	0.0724552	1	0	0	13.3333	34.9972	GPX1
monovalent inorganic anion homeostasis (GO:0055083)	1/15	0.0724552	1	0	0	13.3333	34.9972	SLC34A1
fatty acid beta-oxidation using acyl-CoA dehydrogenase (GO:0033539)	1/15	0.0724552	1	0	0	13.3333	34.9972	ACOX1
regulation of neuron apoptotic process (GO:0043523)	2/89	0.0732536	1	0	0	4.49438	11.7475	SOD1;LGMN
regulation of Ras protein signal transduction (GO:0046578)	2/90	0.0746819	1	0	0	4.44444	11.5312	SQSTM1;FBP1
regulation of SMAD protein import into nucleus (GO:0060390)	1/16	0.0770964	1	0	0	12.5	32.0337	DAB2
positive regulation of leukocyte activation (GO:0002696)	1/16	0.0770964	1	0	0	12.5	32.0337	HSPD1
positive regulation of regulated secretory pathway (GO:1903307)	1/16	0.0770964	1	0	0	12.5	32.0337	TMEM27
positive regulation of cell migration involved in sprouting angiogenesis (GO:0090050)	1/16	0.0770964	1	0	0	12.5	32.0337	HMOX1
hexose transport (GO:0008645)	1/16	0.0770964	1	0	0	12.5	32.0337	SLC5A2
regulation of reactive oxygen species biosynthetic process (GO:1903426)	1/16	0.0770964	1	0	0	12.5	32.0337	CYBA
regulation of interferon-alpha production (GO:0032647)	1/16	0.0770964	1	0	0	12.5	32.0337	HSPD1
negative regulation of steroid biosynthetic process (GO:0010894)	1/16	0.0770964	1	0	0	12.5	32.0337	SOD1
regulation of acrosome reaction (GO:0060046)	1/16	0.0770964	1	0	0	12.5	32.0337	SPINK1
serine family amino acid metabolic process (GO:0009069)	1/17	0.0817146	1	0	0	11.7647	29.465	GLYAT
chaperone-mediated protein complex assembly (GO:0051131)	1/17	0.0817146	1	0	0	11.7647	29.465	HSPD1
regulation of multicellular organism growth (GO:0040014)	1/17	0.0817146	1	0	0	11.7647	29.465	SOD1
DNA catabolic process (GO:0006308)	1/17	0.0817146	1	0	0	11.7647	29.465	DNASE1
regulation of early endosome to late endosome transport (GO:2000641)	1/17	0.0817146	1	0	0	11.7647	29.465	DAB2
nucleobase-containing compound biosynthetic process (GO:0034654)	1/17	0.0817146	1	0	0	11.7647	29.465	CDA
positive regulation of cation transmembrane transport (GO:1904064)	1/17	0.0817146	1	0	0	11.7647	29.465	PDZK1
regulation of insulin-like growth factor receptor signaling pathway (GO:0043567)	1/17	0.0817146	1	0	0	11.7647	29.465	IGFBP4
cellular response to glucocorticoid stimulus (GO:0071385)	1/17	0.0817146	1	0	0	11.7647	29.465	PCK1
2-oxoglutarate metabolic process (GO:0006103)	1/17	0.0817146	1	0	0	11.7647	29.465	IDH1
positive regulation of macrophage activation (GO:0043032)	1/17	0.0817146	1	0	0	11.7647	29.465	HSPD1
heterocycle biosynthetic process (GO:0018130)	1/17	0.0817146	1	0	0	11.7647	29.465	MT-RNR1
negative regulation of cellular carbohydrate metabolic process (GO:0010677)	1/17	0.0817146	1	0	0	11.7647	29.465	FBP1
nucleotide catabolic process (GO:0009166)	1/17	0.0817146	1	0	0	11.7647	29.465	GPX1
positive regulation of response to biotic stimulus (GO:0002833)	1/17	0.0817146	1	0	0	11.7647	29.465	CYBA
positive regulation of protein localization to membrane (GO:1905477)	2/95	0.0819552	1	0	0	4.21053	10.533	PDZK1;SQSTM1
leukotriene biosynthetic process (GO:0019370)	1/18	0.08631	1	0	0	11.1111	27.2201	GGT1
negative regulation of fibroblast proliferation (GO:0048147)	1/18	0.08631	1	0	0	11.1111	27.2201	FTH1
iron-sulfur cluster assembly (GO:0016226)	1/18	0.08631	1	0	0	11.1111	27.2201	HSPA9
anion transmembrane transport (GO:0098656)	1/18	0.08631	1	0	0	11.1111	27.2201	SLC13A1
regulation of oxidative stress-induced intrinsic apoptotic signaling pathway (GO:1902175)	1/18	0.08631	1	0	0	11.1111	27.2201	SOD1
response to UV (GO:0009411)	2/98	0.0864202	1	0	0	4.08163	9.99402	GPX1;CAT
regulation of lipid metabolic process (GO:0019216)	2/100	0.0894369	1	0	0	4	9.65689	ACOX1;PLIN2
positive regulation of transforming growth factor beta receptor signaling pathway (GO:0030511)	1/19	0.0908825	1	0	0	10.5263	25.2441	DAB2
regulation of gluconeogenesis (GO:0006111)	1/19	0.0908825	1	0	0	10.5263	25.2441	FBP1
negative regulation of phosphate metabolic process (GO:0045936)	1/19	0.0908825	1	0	0	10.5263	25.2441	CDA
negative regulation of protein localization to plasma membrane (GO:1903077)	1/19	0.0908825	1	0	0	10.5263	25.2441	DAB2
positive regulation of toll-like receptor signaling pathway (GO:0034123)	1/19	0.0908825	1	0	0	10.5263	25.2441	CYBA
negative regulation of protein localization to cell periphery (GO:1904376)	1/19	0.0908825	1	0	0	10.5263	25.2441	DAB2
protein targeting to lysosome (GO:0006622)	1/19	0.0908825	1	0	0	10.5263	25.2441	HSPA8
leukotriene metabolic process (GO:0006691)	1/19	0.0908825	1	0	0	10.5263	25.2441	GGT1
regulation of long-term synaptic potentiation (GO:1900271)	1/19	0.0908825	1	0	0	10.5263	25.2441	SQSTM1
sulfur compound transport (GO:0072348)	1/19	0.0908825	1	0	0	10.5263	25.2441	SLC13A1
positive regulation of interferon-alpha production (GO:0032727)	1/19	0.0908825	1	0	0	10.5263	25.2441	HSPD1
positive regulation of cellular response to transforming growth factor beta stimulus (GO:1903846)	1/19	0.0908825	1	0	0	10.5263	25.2441	DAB2
acylglycerol biosynthetic process (GO:0046463)	1/19	0.0908825	1	0	0	10.5263	25.2441	GK
protein processing (GO:0016485)	2/101	0.090957	1	0	0	3.9604	9.49453	GGT1;LGMN
calcium-independent cell-cell adhesion via plasma membrane cell-adhesion molecules (GO:0016338)	1/20	0.0954324	1	0	0	10	23.4934	CLDN2
purine nucleotide metabolic process (GO:0006163)	1/20	0.0954324	1	0	0	10	23.4934	GPX1
cytokine-mediated signaling pathway (GO:0019221)	6/633	0.0976253	1	0	0	1.89573	4.41065	HSPA9;HSPA8;GSTA2;HMOX1;SQSTM1;SOD1
positive regulation of cytokine production (GO:0001819)	3/220	0.0981163	1	0	0	2.72727	6.33164	CYBA;HSPD1;SOD1
positive regulation of cellular component organization (GO:0051130)	2/106	0.0986696	1	0	0	3.77358	8.73954	DAB2;GPX1
cobalamin metabolic process (GO:0009235)	1/21	0.0999598	1	0	0	9.52381	21.9332	TCN2
epoxygenase P450 pathway (GO:0019373)	1/21	0.0999598	1	0	0	9.52381	21.9332	CYP2E1
response to nicotine (GO:0035094)	1/21	0.0999598	1	0	0	9.52381	21.9332	HMOX1
positive regulation of leukocyte cell-cell adhesion (GO:1903039)	1/21	0.0999598	1	0	0	9.52381	21.9332	HSPD1
cellular response to hexose stimulus (GO:0071331)	1/21	0.0999598	1	0	0	9.52381	21.9332	PCK1
regulation of macrophage activation (GO:0043030)	1/21	0.0999598	1	0	0	9.52381	21.9332	HSPD1
tetrapyrrole metabolic process (GO:0033013)	1/21	0.0999598	1	0	0	9.52381	21.9332	TCN2
positive regulation of T cell mediated immunity (GO:0002711)	1/21	0.0999598	1	0	0	9.52381	21.9332	HSPD1
regulation of cytokine production (GO:0001817)	2/108	0.101805	1	0	0	3.7037	8.46183	HSPD1;SOD1
purine-containing compound biosynthetic process (GO:0072522)	1/22	0.104465	1	0	0	9.09091	20.5355	MT-RNR1
regulation of membrane protein ectodomain proteolysis (GO:0051043)	1/22	0.104465	1	0	0	9.09091	20.5355	TIMP3
positive regulation of biosynthetic process (GO:0009891)	1/22	0.104465	1	0	0	9.09091	20.5355	CYBA
sulfur amino acid metabolic process (GO:0000096)	1/22	0.104465	1	0	0	9.09091	20.5355	NOX4
DNA catabolic process, endonucleolytic (GO:0000737)	1/22	0.104465	1	0	0	9.09091	20.5355	DNASE1
negative regulation of myeloid cell differentiation (GO:0045638)	1/22	0.104465	1	0	0	9.09091	20.5355	HSPA9
positive regulation of interleukin-10 production (GO:0032733)	1/22	0.104465	1	0	0	9.09091	20.5355	HSPD1
regulation of ERBB signaling pathway (GO:1901184)	1/22	0.104465	1	0	0	9.09091	20.5355	LGMN
positive regulation of protein targeting to membrane (GO:0090314)	1/22	0.104465	1	0	0	9.09091	20.5355	PDZK1
regulation of insulin secretion involved in cellular response to glucose stimulus (GO:0061178)	1/22	0.104465	1	0	0	9.09091	20.5355	TMEM27
outflow tract septum morphogenesis (GO:0003148)	1/22	0.104465	1	0	0	9.09091	20.5355	LRP2
exogenous drug catabolic process (GO:0042738)	1/23	0.108947	1	0	0	8.69565	19.2773	CYP2E1
response to alkaloid (GO:0043279)	1/23	0.108947	1	0	0	8.69565	19.2773	HMOX1
cellular nitrogen compound biosynthetic process (GO:0044271)	1/23	0.108947	1	0	0	8.69565	19.2773	MT-RNR1
vitamin transport (GO:0051180)	1/23	0.108947	1	0	0	8.69565	19.2773	TCN2
cholesterol efflux (GO:0033344)	1/23	0.108947	1	0	0	8.69565	19.2773	ABCG2
positive regulation of ion transmembrane transporter activity (GO:0032414)	1/23	0.108947	1	0	0	8.69565	19.2773	PDZK1
glycolytic process (GO:0006096)	1/23	0.108947	1	0	0	8.69565	19.2773	ALDOB
regulation of androgen receptor signaling pathway (GO:0060765)	1/23	0.108947	1	0	0	8.69565	19.2773	DAB2
regulation of proteolysis involved in cellular protein catabolic process (GO:1903050)	1/23	0.108947	1	0	0	8.69565	19.2773	GPX1
epithelium development (GO:0060429)	2/115	0.11299	1	0	0	3.47826	7.58419	PTER;GSTA2
receptor catabolic process (GO:0032801)	1/24	0.113408	1	0	0	8.33333	18.1397	LGMN
negative regulation of protein localization to membrane (GO:1905476)	1/24	0.113408	1	0	0	8.33333	18.1397	DAB2
regulation of transmembrane transport (GO:0034762)	1/24	0.113408	1	0	0	8.33333	18.1397	KCNJ15
transition metal ion homeostasis (GO:0055076)	1/24	0.113408	1	0	0	8.33333	18.1397	HMOX1
ATP generation from ADP (GO:0006757)	1/24	0.113408	1	0	0	8.33333	18.1397	ALDOB
drug catabolic process (GO:0042737)	1/24	0.113408	1	0	0	8.33333	18.1397	CYP2E1
organic cation transport (GO:0015695)	1/24	0.113408	1	0	0	8.33333	18.1397	SLC47A1
glycolytic process through glucose-6-phosphate (GO:0061620)	1/25	0.117846	1	0	0	8	17.107	ALDOB
regulation of interleukin-10 production (GO:0032653)	1/25	0.117846	1	0	0	8	17.107	HSPD1
canonical glycolysis (GO:0061621)	1/25	0.117846	1	0	0	8	17.107	ALDOB
long-chain fatty acid transport (GO:0015909)	1/25	0.117846	1	0	0	8	17.107	SLC27A2
response to alcohol (GO:0097305)	1/25	0.117846	1	0	0	8	17.107	SOD1
glucose catabolic process to pyruvate (GO:0061718)	1/25	0.117846	1	0	0	8	17.107	ALDOB
positive regulation of nitric oxide biosynthetic process (GO:0045429)	1/25	0.117846	1	0	0	8	17.107	ASS1
regulation of glucose metabolic process (GO:0010906)	1/25	0.117846	1	0	0	8	17.107	FBP1
signal transduction in response to DNA damage (GO:0042770)	1/25	0.117846	1	0	0	8	17.107	NDRG1
positive regulation of interleukin-12 production (GO:0032735)	1/25	0.117846	1	0	0	8	17.107	HSPD1
peptide catabolic process (GO:0043171)	1/25	0.117846	1	0	0	8	17.107	GGT1
positive regulation of nitric oxide metabolic process (GO:1904407)	1/25	0.117846	1	0	0	8	17.107	ASS1
prostaglandin metabolic process (GO:0006693)	1/25	0.117846	1	0	0	8	17.107	ACOX1
bile acid biosynthetic process (GO:0006699)	1/26	0.122262	1	0	0	7.69231	16.1661	SLC27A2
phosphatidylcholine acyl-chain remodeling (GO:0036151)	1/27	0.126657	1	0	0	7.40741	15.3057	DBI
regulation of protein targeting to membrane (GO:0090313)	1/27	0.126657	1	0	0	7.40741	15.3057	PDZK1
negative regulation of smooth muscle cell proliferation (GO:0048662)	1/27	0.126657	1	0	0	7.40741	15.3057	HMOX1
regulation of blood vessel diameter (GO:0097746)	1/27	0.126657	1	0	0	7.40741	15.3057	HMOX1
negative regulation of small GTPase mediated signal transduction (GO:0051058)	1/27	0.126657	1	0	0	7.40741	15.3057	FBP1
regulation of protein transport (GO:0051223)	1/27	0.126657	1	0	0	7.40741	15.3057	HSPA8
cellular response to glucose stimulus (GO:0071333)	1/27	0.126657	1	0	0	7.40741	15.3057	PCK1
negative regulation of cellular process (GO:0048523)	5/534	0.1295	1	0	0	1.87266	3.82786	CDA;FTH1;OSGIN1;NOX4;FBP1
regulation of vasculature development (GO:1901342)	1/28	0.131029	1	0	0	7.14286	14.5167	HMOX1
negative regulation of intracellular steroid hormone receptor signaling pathway (GO:0033144)	1/28	0.131029	1	0	0	7.14286	14.5167	DAB2
cellular response to ketone (GO:1901655)	1/28	0.131029	1	0	0	7.14286	14.5167	PCK1
negative regulation of homeostatic process (GO:0032845)	1/28	0.131029	1	0	0	7.14286	14.5167	HSPA9
RNA phosphodiester bond hydrolysis (GO:0090501)	1/28	0.131029	1	0	0	7.14286	14.5167	LACTB2
primary neural tube formation (GO:0014020)	1/28	0.131029	1	0	0	7.14286	14.5167	LRP2
positive regulation of sprouting angiogenesis (GO:1903672)	1/28	0.131029	1	0	0	7.14286	14.5167	HMOX1
protein alkylation (GO:0008213)	1/29	0.13538	1	0	0	6.89655	13.7908	HSPA8
dicarboxylic acid transport (GO:0006835)	1/29	0.13538	1	0	0	6.89655	13.7908	SLC22A6
MyD88-dependent toll-like receptor signaling pathway (GO:0002755)	1/29	0.13538	1	0	0	6.89655	13.7908	HSPD1
very long-chain fatty acid metabolic process (GO:0000038)	1/29	0.13538	1	0	0	6.89655	13.7908	ACOX1
tube closure (GO:0060606)	1/29	0.13538	1	0	0	6.89655	13.7908	LRP2
B cell proliferation (GO:0042100)	1/29	0.13538	1	0	0	6.89655	13.7908	HSPD1
carbohydrate derivative biosynthetic process (GO:1901137)	1/29	0.13538	1	0	0	6.89655	13.7908	GK
positive regulation of programmed cell death (GO:0043068)	3/257	0.137965	1	0	0	2.33463	4.62433	SQSTM1;HSPD1;SOD1
artery morphogenesis (GO:0048844)	1/30	0.13971	1	0	0	6.66667	13.1213	LRP2
regulation of developmental growth (GO:0048638)	1/30	0.13971	1	0	0	6.66667	13.1213	SOD1
regulation of cell migration involved in sprouting angiogenesis (GO:0090049)	1/30	0.13971	1	0	0	6.66667	13.1213	HMOX1
bile acid metabolic process (GO:0008206)	1/30	0.13971	1	0	0	6.66667	13.1213	SLC27A2
regulation of cation transmembrane transport (GO:1904062)	1/30	0.13971	1	0	0	6.66667	13.1213	PDZK1
cellular response to drug (GO:0035690)	1/30	0.13971	1	0	0	6.66667	13.1213	FBP1
cellular response to hypoxia (GO:0071456)	2/132	0.141342	1	0	0	3.0303	5.92901	HMOX1;NDRG1
negative regulation of cell-cell adhesion (GO:0022408)	1/31	0.144017	1	0	0	6.45161	12.5021	ASS1
positive regulation of insulin secretion (GO:0032024)	1/31	0.144017	1	0	0	6.45161	12.5021	TMEM27
liver development (GO:0001889)	1/31	0.144017	1	0	0	6.45161	12.5021	PCK1
response to cadmium ion (GO:0046686)	1/31	0.144017	1	0	0	6.45161	12.5021	SLC34A1
anterograde axonal transport (GO:0008089)	1/31	0.144017	1	0	0	6.45161	12.5021	SOD1
cofactor biosynthetic process (GO:0051188)	1/31	0.144017	1	0	0	6.45161	12.5021	HSPA9
regulation of nitric oxide biosynthetic process (GO:0045428)	1/32	0.148304	1	0	0	6.25	11.9281	ASS1
negative regulation of BMP signaling pathway (GO:0030514)	1/32	0.148304	1	0	0	6.25	11.9281	LRP2
phosphatidylcholine biosynthetic process (GO:0006656)	1/32	0.148304	1	0	0	6.25	11.9281	CHPT1
purine ribonucleoside triphosphate metabolic process (GO:0009205)	1/32	0.148304	1	0	0	6.25	11.9281	HSPA8
positive regulation of tumor necrosis factor superfamily cytokine production (GO:1903557)	1/32	0.148304	1	0	0	6.25	11.9281	CYBA
regulation of erythrocyte differentiation (GO:0045646)	1/32	0.148304	1	0	0	6.25	11.9281	HSPA9
cellular glucose homeostasis (GO:0001678)	1/33	0.152569	1	0	0	6.06061	11.3948	PCK1
protein acetylation (GO:0006473)	1/33	0.152569	1	0	0	6.06061	11.3948	PCK1
positive regulation of intrinsic apoptotic signaling pathway (GO:2001244)	1/33	0.152569	1	0	0	6.06061	11.3948	SOD1
regulation of T cell differentiation (GO:0045580)	1/33	0.152569	1	0	0	6.06061	11.3948	SOD1
negative regulation of mitochondrion organization (GO:0010823)	1/33	0.152569	1	0	0	6.06061	11.3948	GPX1
regulation of interleukin-12 production (GO:0032655)	1/33	0.152569	1	0	0	6.06061	11.3948	HSPD1
neural tube closure (GO:0001843)	1/33	0.152569	1	0	0	6.06061	11.3948	LRP2
positive regulation of catalytic activity (GO:0043085)	1/33	0.152569	1	0	0	6.06061	11.3948	SOD1
regulation of primary metabolic process (GO:0080090)	2/139	0.153424	1	0	0	2.8777	5.39439	ACOX1;PLIN2
regulation of cellular component organization (GO:0051128)	2/140	0.155166	1	0	0	2.85714	5.32359	HSPA8;CHPT1
positive regulation of chemokine production (GO:0032722)	1/34	0.156813	1	0	0	5.88235	10.8982	HMOX1
apoptotic mitochondrial changes (GO:0008637)	1/34	0.156813	1	0	0	5.88235	10.8982	HSPD1
ventricular cardiac muscle tissue morphogenesis (GO:0055010)	1/34	0.156813	1	0	0	5.88235	10.8982	LRP2
positive regulation of cell development (GO:0010720)	1/34	0.156813	1	0	0	5.88235	10.8982	LRP2
positive regulation of ATPase activity (GO:0032781)	1/35	0.161037	1	0	0	5.71429	10.435	ALDOB
membrane protein proteolysis (GO:0033619)	1/35	0.161037	1	0	0	5.71429	10.435	NAPSA
carboxylic acid transmembrane transport (GO:1905039)	1/35	0.161037	1	0	0	5.71429	10.435	LRP2
erythrocyte differentiation (GO:0030218)	1/35	0.161037	1	0	0	5.71429	10.435	HSPA9
carbohydrate catabolic process (GO:0016052)	1/35	0.161037	1	0	0	5.71429	10.435	ALDOB
flagellated sperm motility (GO:0030317)	1/35	0.161037	1	0	0	5.71429	10.435	SORD
regulation of mitochondrial membrane potential (GO:0051881)	1/35	0.161037	1	0	0	5.71429	10.435	SOD1
regulation of ion transmembrane transport (GO:0034765)	1/35	0.161037	1	0	0	5.71429	10.435	KCNJ15
sulfur compound catabolic process (GO:0044273)	1/35	0.161037	1	0	0	5.71429	10.435	GGT1
cellular protein complex assembly (GO:0043623)	2/144	0.162174	1	0	0	2.77778	5.05301	CYBA;HSPD1
endosome organization (GO:0007032)	1/36	0.165239	1	0	0	5.55556	10.002	SQSTM1
organophosphate biosynthetic process (GO:0090407)	1/36	0.165239	1	0	0	5.55556	10.002	GK
acylglycerol metabolic process (GO:0006639)	1/36	0.165239	1	0	0	5.55556	10.002	GK
lymphocyte proliferation (GO:0046651)	1/36	0.165239	1	0	0	5.55556	10.002	HSPD1
axonal transport (GO:0098930)	1/36	0.165239	1	0	0	5.55556	10.002	SOD1
zymogen activation (GO:0031638)	1/36	0.165239	1	0	0	5.55556	10.002	GGT1
negative regulation of canonical Wnt signaling pathway (GO:0090090)	2/148	0.169239	1	0	0	2.7027	4.8012	DAB2;IGFBP4
negative regulation of Ras protein signal transduction (GO:0046580)	1/37	0.16942	1	0	0	5.40541	9.59662	FBP1
positive regulation of smooth muscle cell proliferation (GO:0048661)	1/37	0.16942	1	0	0	5.40541	9.59662	HMOX1
positive regulation of multi-organism process (GO:0043902)	1/37	0.16942	1	0	0	5.40541	9.59662	CYBA
organic cyclic compound biosynthetic process (GO:1901362)	1/37	0.16942	1	0	0	5.40541	9.59662	MT-RNR1
potassium ion import (GO:0010107)	1/38	0.173581	1	0	0	5.26316	9.21638	KCNJ15
mitochondrion disassembly (GO:0061726)	1/38	0.173581	1	0	0	5.26316	9.21638	SQSTM1
regulation of cellular pH (GO:0030641)	1/38	0.173581	1	0	0	5.26316	9.21638	SLC4A4
retina homeostasis (GO:0001895)	1/38	0.173581	1	0	0	5.26316	9.21638	SOD1
chemical homeostasis (GO:0048878)	1/38	0.173581	1	0	0	5.26316	9.21638	ACOX1
signal transduction by p53 class mediator (GO:0072331)	1/39	0.177721	1	0	0	5.12821	8.85919	NDRG1
positive regulation of phagocytosis (GO:0050766)	1/39	0.177721	1	0	0	5.12821	8.85919	CYBA
negative regulation of protein catabolic process (GO:0042177)	1/39	0.177721	1	0	0	5.12821	8.85919	TIMP3
purine ribonucleoside monophosphate metabolic process (GO:0009167)	1/39	0.177721	1	0	0	5.12821	8.85919	HSPA8
regulation of proteasomal protein catabolic process (GO:0061136)	1/39	0.177721	1	0	0	5.12821	8.85919	GPX1
spermatogenesis (GO:0007283)	2/153	0.178143	1	0	0	2.61438	4.51025	GGT1;SOD1
proteolysis (GO:0006508)	3/291	0.178599	1	0	0	2.06186	3.55177	NAPSA;GGT1;LGMN
male gamete generation (GO:0048232)	2/154	0.179932	1	0	0	2.5974	4.455	GGT1;SOD1
positive regulation of cytokine biosynthetic process (GO:0042108)	1/40	0.18184	1	0	0	5	8.52314	HMOX1
regulation of ATPase activity (GO:0043462)	1/40	0.18184	1	0	0	5	8.52314	ALDOB
response to peptide hormone (GO:0043434)	1/40	0.18184	1	0	0	5	8.52314	PCK1
negative regulation of ERK1 and ERK2 cascade (GO:0070373)	1/40	0.18184	1	0	0	5	8.52314	TIMP3
regulation of release of cytochrome c from mitochondria (GO:0090199)	1/40	0.18184	1	0	0	5	8.52314	GPX1
negative regulation of catabolic process (GO:0009895)	1/40	0.18184	1	0	0	5	8.52314	FBP1
positive regulation of epithelial to mesenchymal transition (GO:0010718)	1/40	0.18184	1	0	0	5	8.52314	DAB2
autophagy of mitochondrion (GO:0000422)	1/40	0.18184	1	0	0	5	8.52314	SQSTM1
regulation of cholesterol biosynthetic process (GO:0045540)	1/40	0.18184	1	0	0	5	8.52314	SOD1
bicarbonate transport (GO:0015701)	1/41	0.185939	1	0	0	4.87805	8.20652	SLC4A4
regulation of phagocytosis (GO:0050764)	1/41	0.185939	1	0	0	4.87805	8.20652	CYBA
negative regulation of proteolysis (GO:0045861)	1/41	0.185939	1	0	0	4.87805	8.20652	TIMP3
positive regulation of receptor-mediated endocytosis (GO:0048260)	1/41	0.185939	1	0	0	4.87805	8.20652	DAB2
regulation of ion transmembrane transporter activity (GO:0032412)	1/42	0.190018	1	0	0	4.7619	7.9078	PDZK1
positive regulation of interferon-gamma production (GO:0032729)	1/43	0.194076	1	0	0	4.65116	7.6256	HSPD1
development of primary male sexual characteristics (GO:0046546)	1/43	0.194076	1	0	0	4.65116	7.6256	LRP2
positive regulation of protein localization to plasma membrane (GO:1903078)	1/43	0.194076	1	0	0	4.65116	7.6256	SQSTM1
negative regulation of ERBB signaling pathway (GO:1901185)	1/43	0.194076	1	0	0	4.65116	7.6256	LGMN
male gonad development (GO:0008584)	1/43	0.194076	1	0	0	4.65116	7.6256	LRP2
regulation of multicellular organismal development (GO:2000026)	1/43	0.194076	1	0	0	4.65116	7.6256	GPX1
regulation of interferon-gamma production (GO:0032649)	1/43	0.194076	1	0	0	4.65116	7.6256	HSPD1
protein transmembrane import into intracellular organelle (GO:0044743)	1/43	0.194076	1	0	0	4.65116	7.6256	HSPD1
positive regulation of transport (GO:0051050)	1/44	0.198114	1	0	0	4.54545	7.35868	DAB2
unsaturated fatty acid metabolic process (GO:0033559)	1/44	0.198114	1	0	0	4.54545	7.35868	ACOX1
cholesterol transport (GO:0030301)	1/44	0.198114	1	0	0	4.54545	7.35868	ABCG2
regulation of T cell activation (GO:0050863)	1/44	0.198114	1	0	0	4.54545	7.35868	HSPD1
regulation of smooth muscle cell proliferation (GO:0048660)	1/44	0.198114	1	0	0	4.54545	7.35868	HMOX1
amide biosynthetic process (GO:0043604)	1/44	0.198114	1	0	0	4.54545	7.35868	ASS1
regulation of intracellular pH (GO:0051453)	1/44	0.198114	1	0	0	4.54545	7.35868	SLC4A4
carboxylic acid biosynthetic process (GO:0046394)	1/44	0.198114	1	0	0	4.54545	7.35868	AKR1A1
myeloid cell differentiation (GO:0030099)	1/44	0.198114	1	0	0	4.54545	7.35868	HSPA9
negative regulation of immune system process (GO:0002683)	1/44	0.198114	1	0	0	4.54545	7.35868	HMOX1
positive regulation of apoptotic process (GO:0043065)	3/307	0.198757	1	0	0	1.9544	3.15766	SQSTM1;HSPD1;SOD1
regulation of inflammatory response (GO:0050727)	2/166	0.201606	1	0	0	2.40964	3.85889	DNASE1;GGT1
positive regulation of blood vessel endothelial cell migration (GO:0043536)	1/45	0.202133	1	0	0	4.44444	7.10592	HMOX1
nicotinamide nucleotide metabolic process (GO:0046496)	1/45	0.202133	1	0	0	4.44444	7.10592	ALDOB
regulation of fibroblast proliferation (GO:0048145)	1/46	0.206131	1	0	0	4.34783	6.86628	FTH1
protein methylation (GO:0006479)	1/46	0.206131	1	0	0	4.34783	6.86628	HSPA8
positive regulation of protein localization to cell periphery (GO:1904377)	1/46	0.206131	1	0	0	4.34783	6.86628	SQSTM1
response to glucose (GO:0009749)	1/47	0.210109	1	0	0	4.25532	6.63884	PCK1
inositol phosphate metabolic process (GO:0043647)	1/47	0.210109	1	0	0	4.25532	6.63884	MIOX
positive regulation of tumor necrosis factor production (GO:0032760)	1/47	0.210109	1	0	0	4.25532	6.63884	CYBA
positive regulation of pathway-restricted SMAD protein phosphorylation (GO:0010862)	1/47	0.210109	1	0	0	4.25532	6.63884	DAB2
polyol metabolic process (GO:0019751)	1/47	0.210109	1	0	0	4.25532	6.63884	MIOX
regulation of mitochondrion organization (GO:0010821)	1/48	0.214068	1	0	0	4.16667	6.42275	SQSTM1
pattern recognition receptor signaling pathway (GO:0002221)	1/48	0.214068	1	0	0	4.16667	6.42275	LGMN
negative regulation of Wnt signaling pathway (GO:0030178)	2/174	0.216222	1	0	0	2.29885	3.52058	DAB2;IGFBP4
organic hydroxy compound biosynthetic process (GO:1901617)	1/49	0.218007	1	0	0	4.08163	6.21725	SLC27A2
establishment of protein localization to mitochondrion (GO:0072655)	1/49	0.218007	1	0	0	4.08163	6.21725	HSPD1
gonad development (GO:0008406)	1/49	0.218007	1	0	0	4.08163	6.21725	LRP2
lipid homeostasis (GO:0055088)	1/49	0.218007	1	0	0	4.08163	6.21725	ACOX1
wound healing (GO:0042060)	1/50	0.221927	1	0	0	4	6.02163	HMOX1
cellular protein metabolic process (GO:0044267)	4/484	0.223632	1	0	0	1.65289	2.47563	NAPSA;IGFBP4;SLC34A1;LGMN
arachidonic acid metabolic process (GO:0019369)	1/51	0.225827	1	0	0	3.92157	5.83524	CYP2E1
triglyceride metabolic process (GO:0006641)	1/52	0.229708	1	0	0	3.84615	5.65749	GK
positive regulation of nervous system development (GO:0051962)	1/52	0.229708	1	0	0	3.84615	5.65749	LRP2
positive regulation of protein import into nucleus (GO:0042307)	1/53	0.233569	1	0	0	3.77358	5.48784	DAB2
regulation of calcium ion-dependent exocytosis (GO:0017158)	1/53	0.233569	1	0	0	3.77358	5.48784	TMEM27
negative regulation of cellular component organization (GO:0051129)	1/54	0.237412	1	0	0	3.7037	5.32578	HSPA8
protein targeting to mitochondrion (GO:0006626)	1/54	0.237412	1	0	0	3.7037	5.32578	HSPD1
cellular response to nutrient levels (GO:0031669)	1/54	0.237412	1	0	0	3.7037	5.32578	HSPA8
positive regulation of response to stimulus (GO:0048584)	1/54	0.237412	1	0	0	3.7037	5.32578	TMEM27
negative regulation of supramolecular fiber organization (GO:1902904)	1/54	0.237412	1	0	0	3.7037	5.32578	HSPA8
negative regulation of cellular response to growth factor stimulus (GO:0090288)	1/55	0.241235	1	0	0	3.63636	5.17085	LRP2
regulation of BMP signaling pathway (GO:0030510)	1/56	0.245039	1	0	0	3.57143	5.02263	LRP2
ATP metabolic process (GO:0046034)	1/56	0.245039	1	0	0	3.57143	5.02263	HSPA8
negative regulation of cellular catabolic process (GO:0031330)	1/56	0.245039	1	0	0	3.57143	5.02263	TIMP3
regulation of glycolytic process (GO:0006110)	1/57	0.248825	1	0	0	3.50877	4.88073	FBP1
regulation of neurogenesis (GO:0050767)	1/57	0.248825	1	0	0	3.50877	4.88073	LRP2
receptor metabolic process (GO:0043112)	1/58	0.252591	1	0	0	3.44828	4.74477	LGMN
cell morphogenesis (GO:0000902)	1/59	0.256339	1	0	0	3.38983	4.61442	NOX4
regulation of pathway-restricted SMAD protein phosphorylation (GO:0060393)	1/59	0.256339	1	0	0	3.38983	4.61442	DAB2
potassium ion transport (GO:0006813)	1/61	0.263779	1	0	0	3.27869	4.36932	KCNJ15
regulation of tumor necrosis factor production (GO:0032680)	1/61	0.263779	1	0	0	3.27869	4.36932	CYBA
diterpenoid metabolic process (GO:0016101)	1/62	0.267472	1	0	0	3.22581	4.25401	LRP2
negative regulation of peptidase activity (GO:0010466)	1/62	0.267472	1	0	0	3.22581	4.25401	TIMP3
positive regulation of type I interferon production (GO:0032481)	1/62	0.267472	1	0	0	3.22581	4.25401	HSPD1
cellular protein catabolic process (GO:0044257)	1/62	0.267472	1	0	0	3.22581	4.25401	LGMN
positive regulation of multicellular organismal process (GO:0051240)	2/202	0.267934	1	0	0	1.9802	2.60795	DAB2;SOD1
carbohydrate homeostasis (GO:0033500)	1/63	0.271146	1	0	0	3.1746	4.14317	PCK1
regulation of I-kappaB kinase/NF-kappaB signaling (GO:0043122)	2/204	0.271641	1	0	0	1.96078	2.55544	HMOX1;SQSTM1
negative regulation of cell proliferation (GO:0008285)	3/363	0.272795	1	0	0	1.65289	2.14717	FTH1;HMOX1;NOX4
negative regulation of apoptotic signaling pathway (GO:2001234)	1/65	0.278439	1	0	0	3.07692	3.93402	GPX1
fatty acid catabolic process (GO:0009062)	1/65	0.278439	1	0	0	3.07692	3.93402	SLC27A2
regulation of myeloid cell differentiation (GO:0045637)	1/65	0.278439	1	0	0	3.07692	3.93402	HSPA9
purine ribonucleotide metabolic process (GO:0009150)	1/66	0.282059	1	0	0	3.0303	3.83528	HSPA8
positive regulation of endothelial cell proliferation (GO:0001938)	1/67	0.28566	1	0	0	2.98507	3.74016	HMOX1
negative regulation of protein binding (GO:0032091)	1/67	0.28566	1	0	0	2.98507	3.74016	DAB2
positive regulation of synaptic transmission (GO:0050806)	1/67	0.28566	1	0	0	2.98507	3.74016	SQSTM1
regulation of canonical Wnt signaling pathway (GO:0060828)	2/213	0.288311	1	0	0	1.87793	2.33562	DAB2;IGFBP4
regulation of endopeptidase activity (GO:0052548)	1/68	0.289244	1	0	0	2.94118	3.64849	TIMP3
positive regulation of T cell activation (GO:0050870)	1/68	0.289244	1	0	0	2.94118	3.64849	HSPD1
regulation of epithelial to mesenchymal transition (GO:0010717)	1/68	0.289244	1	0	0	2.94118	3.64849	DAB2
negative regulation of cysteine-type endopeptidase activity involved in apoptotic process (GO:0043154)	1/68	0.289244	1	0	0	2.94118	3.64849	GPX1
monocarboxylic acid biosynthetic process (GO:0072330)	1/68	0.289244	1	0	0	2.94118	3.64849	SLC27A2
response to organic cyclic compound (GO:0014070)	1/69	0.29281	1	0	0	2.89855	3.56009	HMOX1
positive regulation of neurogenesis (GO:0050769)	1/69	0.29281	1	0	0	2.89855	3.56009	LRP2
regulation of endocytosis (GO:0030100)	1/69	0.29281	1	0	0	2.89855	3.56009	DAB2
protein oligomerization (GO:0051259)	2/217	0.295709	1	0	0	1.84332	2.24586	CAT;HMOX1
vascular endothelial growth factor receptor signaling pathway (GO:0048010)	1/70	0.296358	1	0	0	2.85714	3.47482	CYBA
positive regulation of proteasomal ubiquitin-dependent protein catabolic process (GO:0032436)	1/70	0.296358	1	0	0	2.85714	3.47482	DAB2
ion transmembrane transport (GO:0034220)	2/219	0.299405	1	0	0	1.82648	2.20267	SLC13A1;SLC17A3
response to insulin (GO:0032868)	1/71	0.299888	1	0	0	2.8169	3.39252	PCK1
negative regulation of cysteine-type endopeptidase activity (GO:2000117)	1/72	0.303401	1	0	0	2.77778	3.31305	GPX1
regulation of epithelial cell proliferation (GO:0050678)	1/72	0.303401	1	0	0	2.77778	3.31305	GPX1
glycoprotein biosynthetic process (GO:0009101)	1/72	0.303401	1	0	0	2.77778	3.31305	FUT9
B cell activation (GO:0042113)	1/73	0.306897	1	0	0	2.73973	3.23628	HSPD1
nucleic acid phosphodiester bond hydrolysis (GO:0090305)	1/73	0.306897	1	0	0	2.73973	3.23628	DNASE1
regulation of protein complex assembly (GO:0043254)	1/73	0.306897	1	0	0	2.73973	3.23628	HSPA8
positive regulation of proteasomal protein catabolic process (GO:1901800)	1/73	0.306897	1	0	0	2.73973	3.23628	DAB2
regulation of gene expression, epigenetic (GO:0040029)	1/74	0.310375	1	0	0	2.7027	3.16209	GPX1
positive regulation of defense response (GO:0031349)	1/74	0.310375	1	0	0	2.7027	3.16209	CYBA
glucose homeostasis (GO:0042593)	1/74	0.310375	1	0	0	2.7027	3.16209	PCK1
antigen processing and presentation of exogenous peptide antigen via MHC class I, TAP-dependent (GO:0002479)	1/75	0.313836	1	0	0	2.66667	3.09036	CYBA
negative regulation of phosphorylation (GO:0042326)	1/75	0.313836	1	0	0	2.66667	3.09036	FBP1
negative regulation of cellular amide metabolic process (GO:0034249)	1/75	0.313836	1	0	0	2.66667	3.09036	RIDA
gland development (GO:0048732)	1/75	0.313836	1	0	0	2.66667	3.09036	SOD1
retinoid metabolic process (GO:0001523)	1/75	0.313836	1	0	0	2.66667	3.09036	LRP2
regulation of defense response (GO:0031347)	1/75	0.313836	1	0	0	2.66667	3.09036	GGT1
negative regulation of transmembrane receptor protein serine/threonine kinase signaling pathway (GO:0090101)	1/77	0.320707	1	0	0	2.5974	2.95384	LRP2
antigen processing and presentation of exogenous peptide antigen via MHC class I (GO:0042590)	1/78	0.324116	1	0	0	2.5641	2.88886	CYBA
regulation of cellular response to heat (GO:1900034)	1/78	0.324116	1	0	0	2.5641	2.88886	HSPA8
activation of protein kinase activity (GO:0032147)	2/233	0.325176	1	0	0	1.71674	1.92857	MT-RNR1;SOD1
steroid biosynthetic process (GO:0006694)	1/79	0.327509	1	0	0	2.53165	2.82593	SLC27A2
activation of cysteine-type endopeptidase activity involved in apoptotic process (GO:0006919)	1/79	0.327509	1	0	0	2.53165	2.82593	HSPD1
regulation of transforming growth factor beta receptor signaling pathway (GO:0017015)	1/79	0.327509	1	0	0	2.53165	2.82593	DAB2
cellular response to hormone stimulus (GO:0032870)	1/80	0.330885	1	0	0	2.5	2.76496	ABCC2
nucleic acid metabolic process (GO:0090304)	1/80	0.330885	1	0	0	2.5	2.76496	IGFBP4
negative regulation of MAPK cascade (GO:0043409)	1/80	0.330885	1	0	0	2.5	2.76496	TIMP3
regulation of hydrolase activity (GO:0051336)	1/80	0.330885	1	0	0	2.5	2.76496	SOD1
regulation of anatomical structure morphogenesis (GO:0022603)	1/82	0.337586	1	0	0	2.43902	2.64862	HMOX1
DNA damage response, signal transduction by p53 class mediator (GO:0030330)	1/82	0.337586	1	0	0	2.43902	2.64862	NDRG1
negative regulation of binding (GO:0051100)	1/82	0.337586	1	0	0	2.43902	2.64862	DAB2
positive regulation of transmembrane receptor protein serine/threonine kinase signaling pathway (GO:0090100)	1/82	0.337586	1	0	0	2.43902	2.64862	DAB2
positive regulation of homeostatic process (GO:0032846)	1/83	0.340912	1	0	0	2.40964	2.59309	TMEM27
protein maturation (GO:0051604)	1/83	0.340912	1	0	0	2.40964	2.59309	HSPD1
positive regulation of supramolecular fiber organization (GO:1902905)	1/84	0.344221	1	0	0	2.38095	2.53922	GPX1
T cell activation (GO:0042110)	1/88	0.357294	1	0	0	2.27273	2.33908	HSPD1
positive regulation of protein complex assembly (GO:0031334)	1/88	0.357294	1	0	0	2.27273	2.33908	TMEM27
regulation of proteasomal ubiquitin-dependent protein catabolic process (GO:0032434)	1/88	0.357294	1	0	0	2.27273	2.33908	DAB2
negative regulation of translation (GO:0017148)	1/88	0.357294	1	0	0	2.27273	2.33908	RIDA
inflammatory response (GO:0006954)	2/252	0.359751	1	0	0	1.5873	1.62277	NOX4;CYBA
negative regulation of cellular protein metabolic process (GO:0032269)	1/89	0.360521	1	0	0	2.24719	2.29259	RIDA
positive regulation of response to external stimulus (GO:0032103)	1/90	0.363733	1	0	0	2.22222	2.24741	CYBA
proteolysis involved in cellular protein catabolic process (GO:0051603)	1/93	0.373273	1	0	0	2.15054	2.11924	LGMN
regulation of transcription from RNA polymerase II promoter in response to stress (GO:0043618)	1/93	0.373273	1	0	0	2.15054	2.11924	HMOX1
regulation of cysteine-type endopeptidase activity involved in apoptotic process (GO:0043281)	1/93	0.373273	1	0	0	2.15054	2.11924	GPX1
regulation of protein phosphorylation (GO:0001932)	2/261	0.375914	1	0	0	1.53257	1.49946	DAB2;SOD1
interleukin-1-mediated signaling pathway (GO:0070498)	1/95	0.379554	1	0	0	2.10526	2.03949	SQSTM1
antigen processing and presentation of exogenous peptide antigen (GO:0002478)	1/97	0.385772	1	0	0	2.06186	1.96394	LGMN
antigen processing and presentation of exogenous peptide antigen via MHC class II (GO:0019886)	1/97	0.385772	1	0	0	2.06186	1.96394	LGMN
antigen processing and presentation of peptide antigen via MHC class II (GO:0002495)	1/98	0.388858	1	0	0	2.04082	1.92763	LGMN
cellular response to metal ion (GO:0071248)	1/100	0.394984	1	0	0	2	1.85782	FBP1
regulation of kinase activity (GO:0043549)	1/101	0.398025	1	0	0	1.9802	1.82424	SOD1
positive regulation of angiogenesis (GO:0045766)	1/103	0.40406	1	0	0	1.94175	1.7596	HMOX1
regulation of cellular response to stress (GO:0080135)	1/104	0.407055	1	0	0	1.92308	1.72847	HSPA8
positive regulation of vasculature development (GO:1904018)	1/104	0.407055	1	0	0	1.92308	1.72847	HMOX1
positive regulation of lymphocyte activation (GO:0051251)	1/104	0.407055	1	0	0	1.92308	1.72847	HSPD1
regulation of response to external stimulus (GO:0032101)	1/107	0.415951	1	0	0	1.86916	1.6396	GGT1
cellular response to starvation (GO:0009267)	1/107	0.415951	1	0	0	1.86916	1.6396	HSPA8
positive regulation of cysteine-type endopeptidase activity involved in apoptotic process (GO:0043280)	1/109	0.421809	1	0	0	1.83486	1.58386	HSPD1
macroautophagy (GO:0016236)	1/110	0.424715	1	0	0	1.81818	1.55697	SQSTM1
cellular response to peptide hormone stimulus (GO:0071375)	1/110	0.424715	1	0	0	1.81818	1.55697	PCK1
cellular response to insulin stimulus (GO:0032869)	1/110	0.424715	1	0	0	1.81818	1.55697	PCK1
ion transport (GO:0006811)	2/289	0.425073	1	0	0	1.38408	1.18408	SLC17A1;SLC17A3
regulation of protein binding (GO:0043393)	1/111	0.427608	1	0	0	1.8018	1.53072	DAB2
regulation of organelle organization (GO:0033043)	1/113	0.433349	1	0	0	1.76991	1.48002	SQSTM1
activation of MAPK activity (GO:0000187)	1/117	0.444662	1	0	0	1.7094	1.38537	SOD1
negative regulation of cell migration (GO:0030336)	1/121	0.455751	1	0	0	1.65289	1.29886	HMOX1
regulation of acute inflammatory response (GO:0002673)	1/121	0.455751	1	0	0	1.65289	1.29886	DNASE1
dephosphorylation (GO:0016311)	1/124	0.463923	1	0	0	1.6129	1.23877	FBP1
vesicle organization (GO:0016050)	1/127	0.471974	1	0	0	1.5748	1.18241	SQSTM1
negative regulation of cellular macromolecule biosynthetic process (GO:2000113)	3/512	0.473664	1	0	0	1.17188	0.875692	HSPA8;DAB2;RIDA
regulation of mRNA stability (GO:0043488)	1/128	0.474631	1	0	0	1.5625	1.1644	HSPA8
protein glycosylation (GO:0006486)	1/130	0.479906	1	0	0	1.53846	1.12949	FUT9
cellular response to organic substance (GO:0071310)	1/133	0.487719	1	0	0	1.50376	1.07972	ABCC2
mitochondrial transport (GO:0006839)	1/135	0.492863	1	0	0	1.48148	1.04818	HSPD1
response to cytokine (GO:0034097)	1/138	0.500484	1	0	0	1.44928	1.00316	TIMP3
response to lipid (GO:0033993)	1/140	0.505501	1	0	0	1.42857	0.974578	PCK1
regulation of small GTPase mediated signal transduction (GO:0051056)	1/140	0.505501	1	0	0	1.42857	0.974578	SQSTM1
modification-dependent protein catabolic process (GO:0019941)	1/141	0.507991	1	0	0	1.41844	0.960697	SQSTM1
cell-cell adhesion via plasma-membrane adhesion molecules (GO:0098742)	1/142	0.510469	1	0	0	1.40845	0.947079	CLDN2
skeletal system development (GO:0001501)	1/146	0.520256	1	0	0	1.36986	0.895116	IGFBP4
regulation of protein kinase activity (GO:0045859)	1/147	0.522672	1	0	0	1.36054	0.882722	SOD1
cellular response to interleukin-1 (GO:0071347)	1/150	0.529849	1	0	0	1.33333	0.846884	SQSTM1
positive regulation of intracellular protein transport (GO:0090316)	1/152	0.534574	1	0	0	1.31579	0.824059	PDZK1
protein stabilization (GO:0050821)	1/152	0.534574	1	0	0	1.31579	0.824059	HSPD1
positive regulation of cellular biosynthetic process (GO:0031328)	1/159	0.550745	1	0	0	1.25786	0.750293	ASS1
positive regulation of I-kappaB kinase/NF-kappaB signaling (GO:0043123)	1/163	0.559735	1	0	0	1.22699	0.712015	HMOX1
neuron projection morphogenesis (GO:0048812)	1/163	0.559735	1	0	0	1.22699	0.712015	LRP2
positive regulation of protein modification process (GO:0031401)	1/163	0.559735	1	0	0	1.22699	0.712015	DAB2
glycerophospholipid biosynthetic process (GO:0046474)	1/164	0.561954	1	0	0	1.21951	0.702847	CHPT1
mitochondrion organization (GO:0007005)	1/167	0.568546	1	0	0	1.1976	0.676255	HSPD1
positive regulation of protein kinase activity (GO:0045860)	1/172	0.579315	1	0	0	1.16279	0.634777	MT-RNR1
positive regulation of hydrolase activity (GO:0051345)	1/172	0.579315	1	0	0	1.16279	0.634777	ALDOB
peptide biosynthetic process (GO:0043043)	1/174	0.583548	1	0	0	1.14943	0.619113	GGT1
positive regulation of MAP kinase activity (GO:0043406)	1/177	0.589818	1	0	0	1.12994	0.596543	SOD1
regulation of angiogenesis (GO:0045765)	1/177	0.589818	1	0	0	1.12994	0.596543	HMOX1
positive regulation of cell motility (GO:2000147)	1/179	0.593946	1	0	0	1.11732	0.582085	DAB2
negative regulation of gene expression (GO:0010629)	3/618	0.600972	1	0	0	0.970874	0.494376	HSPA8;DAB2;RIDA
vesicle-mediated transport (GO:0016192)	2/410	0.610915	1	0	0	0.97561	0.480778	HSPA8;LRP2
receptor-mediated endocytosis (GO:0006898)	1/188	0.61202	1	0	0	1.06383	0.522331	LRP2
regulation of GTPase activity (GO:0043087)	1/188	0.61202	1	0	0	1.06383	0.522331	SOD1
gene expression (GO:0010467)	2/411	0.612247	1	0	0	0.973236	0.477488	NOX4;HSPD1
positive regulation of cell differentiation (GO:0045597)	1/194	0.623624	1	0	0	1.03093	0.486813	DAB2
positive regulation of phosphorylation (GO:0042327)	1/208	0.64938	1	0	0	0.961538	0.415132	DAB2
negative regulation of nucleic acid-templated transcription (GO:1903507)	2/444	0.654308	1	0	0	0.900901	0.382141	HSPA8;DAB2
regulation of translation (GO:0006417)	1/213	0.65815	1	0	0	0.938967	0.392791	RIDA
cellular response to cytokine stimulus (GO:0071345)	2/456	0.668688	1	0	0	0.877193	0.353015	HSPA8;HMOX1
positive regulation of cell migration (GO:0030335)	1/221	0.671731	1	0	0	0.904977	0.360088	DAB2
endosomal transport (GO:0016197)	1/229	0.684778	1	0	0	0.873362	0.330708	SQSTM1
apoptotic process (GO:0006915)	1/231	0.687959	1	0	0	0.865801	0.323832	HSPD1
regulation of signal transduction (GO:0009966)	1/233	0.691108	1	0	0	0.858369	0.317132	IGFBP4
RNA splicing, via transesterification reactions with bulged adenosine as nucleophile (GO:0000377)	1/236	0.695772	1	0	0	0.847458	0.3074	HSPA8
regulation of ERK1 and ERK2 cascade (GO:0070372)	1/247	0.712287	1	0	0	0.809717	0.274716	TIMP3
mRNA splicing, via spliceosome (GO:0000398)	1/261	0.732027	1	0	0	0.766284	0.239033	HSPA8
endocytosis (GO:0006897)	1/263	0.734736	1	0	0	0.760456	0.234407	LRP2
regulation of programmed cell death (GO:0043067)	1/268	0.741388	1	0	0	0.746269	0.223306	NDRG1
mRNA processing (GO:0006397)	1/283	0.760372	1	0	0	0.706714	0.193603	HSPA8
negative regulation of signal transduction (GO:0009968)	1/283	0.760372	1	0	0	0.706714	0.193603	LGMN
negative regulation of transcription, DNA-templated (GO:0045892)	3/813	0.778043	1	0	0	0.738007	0.18522	HSPA8;DAB2;FBP1
DNA metabolic process (GO:0006259)	1/314	0.795341	1	0	0	0.636943	0.14585	IGFBP4
regulation of cell migration (GO:0030334)	1/316	0.797415	1	0	0	0.632911	0.143278	DAB2
ubiquitin-dependent protein catabolic process (GO:0006511)	1/341	0.821649	1	0	0	0.58651	0.115215	SQSTM1
transcription, DNA-templated (GO:0006351)	1/356	0.834788	1	0	0	0.561798	0.101448	MAF
post-translational protein modification (GO:0043687)	1/357	0.835629	1	0	0	0.560224	0.1006	IGFBP4
phosphorylation (GO:0016310)	1/386	0.858258	1	0	0	0.518135	0.0791972	GK
transmembrane receptor protein tyrosine kinase signaling pathway (GO:0007169)	1/396	0.865322	1	0	0	0.505051	0.0730572	CYBA
positive regulation of protein phosphorylation (GO:0001934)	1/412	0.875907	1	0	0	0.485437	0.064318	DAB2
regulation of intracellular signal transduction (GO:1902531)	1/422	0.8821	1	0	0	0.473934	0.0594548	SQSTM1
positive regulation of cell proliferation (GO:0008284)	1/424	0.883302	1	0	0	0.471698	0.0585324	HMOX1
regulation of cell proliferation (GO:0042127)	2/740	0.889004	1	0	0	0.540541	0.0635966	FTH1;NOX4
positive regulation of intracellular signal transduction (GO:1902533)	1/479	0.911983	1	0	0	0.417537	0.0384694	HMOX1
transcription from RNA polymerase II promoter (GO:0006366)	1/485	0.914654	1	0	0	0.412371	0.0367874	MAF
positive regulation of nucleic acid-templated transcription (GO:1903508)	1/502	0.921794	1	0	0	0.398406	0.0324435	DAB2
positive regulation of cellular process (GO:0048522)	1/519	0.928343	1	0	0	0.385356	0.028653	DAB2
negative regulation of transcription from RNA polymerase II promoter (GO:0000122)	1/565	0.943463	1	0	0	0.353982	0.0206011	FBP1
cellular protein modification process (GO:0006464)	2/1001	0.963398	1	0	0	0.3996	0.0149005	IGFBP4;FUT9
positive regulation of transcription, DNA-templated (GO:0045893)	2/1120	0.978439	1	0	0	0.357143	0.00778471	DAB2;SQSTM1
positive regulation of gene expression (GO:0010628)	1/771	0.980574	1	0	0	0.259403	0.00508886	DAB2
regulation of transcription from RNA polymerase II promoter (GO:0006357)	3/1478	0.981442	1	0	0	0.405954	0.00760439	SQSTM1;FBP1;HSPD1
positive regulation of transcription from RNA polymerase II promoter (GO:0045944)	1/848	0.987007	1	0	0	0.235849	0.00308449	SQSTM1
regulation of transcription, DNA-templated (GO:0006355)	3/1598	0.98877	1	0	0	0.375469	0.00424027	HSPA8;DAB2;HSPD1
regulation of gene expression (GO:0010468)	1/1037	0.995191	1	0	0	0.192864	0.000929666	GPX1
